# Supplementary material
Source: Research Square preprint supplement (doi:10.21203/rs.3.rs-7542514/v1)
Supplement: Supplementary file 1 [file ce2f62576c7f270868e0ea4a.pdf]

**Supplemental Files (SF)**  
**Rethinking Gender Identities and Sexual Orientation:**  
**The Multidimensional Gender and**  
**Sexuality Inventory (MGSI)**

---

## Contents

|                                                                                           |           |
|-------------------------------------------------------------------------------------------|-----------|
| <b>1 Literature Review</b>                                                                | <b>1</b>  |
| 1.1 Gender . . . . .                                                                      | 1         |
| 1.2 Sexuality . . . . .                                                                   | 2         |
| 1.3 Discrimination . . . . .                                                              | 2         |
| <b>2 Theoretical Background</b>                                                           | <b>3</b>  |
| <b>3 Survey Instructions and Coding</b>                                                   | <b>4</b>  |
| 3.1 Demographic Questions . . . . .                                                       | 4         |
| 3.2 Multi-Gender Identity Questionnaire (MIQ) . . . . .                                   | 5         |
| 3.3 Transgender Congruence Scale (TCS) . . . . .                                          | 6         |
| 3.4 Multidimensional Scale of Perceived Discrimination (MSPD) . . . . .                   | 7         |
| 3.5 Open Sex Role Inventory (OSRI) . . . . .                                              | 11        |
| 3.6 Sexual Orientation Questionnaire (SOQ) . . . . .                                      | 13        |
| 3.7 Survey Codes . . . . .                                                                | 15        |
| 3.8 Screenshots . . . . .                                                                 | 21        |
| <b>4 Data Analysis</b>                                                                    | <b>21</b> |
| 4.1 Descriptives . . . . .                                                                | 21        |
| 4.2 Replication Analyses - MIQ and SOQ . . . . .                                          | 22        |
| 4.3 Replication Analyses - TCS . . . . .                                                  | 35        |
| 4.4 Replication Analyses - OSRI . . . . .                                                 | 39        |
| 4.5 Replication Analyses - MSPD . . . . .                                                 | 47        |
| 4.6 Summary and Expectation Items Analyses . . . . .                                      | 52        |
| 4.7 Disaggregated Correlation Patterns by Gender Identity . . . . .                       | 53        |
| <b>5 Factor Analysis</b>                                                                  | <b>55</b> |
| 5.1 Correlation Matrix - Excluding Supplementary Items . . . . .                          | 56        |
| 5.2 Exploratory Factor Analysis - Excluding Supplementary Items . . . . .                 | 59        |
| 5.3 Exploratory Factor Analysis - Excluding Supplementary Items - Cisgender . . . . .     | 95        |
| 5.4 Exploratory Factor Analysis - Excluding Supplementary Items - Non-cisgender . . . . . | 100       |
| 5.5 Inclusion of Supplementary Items . . . . .                                            | 105       |
| 5.6 Exploratory Factor Analysis - All Items . . . . .                                     | 105       |
| 5.7 Exploratory Factor Analysis - All Items - Cisgender . . . . .                         | 123       |
| 5.8 Exploratory Factor Analysis - All Items - Non-cisgender . . . . .                     | 128       |

|          |                                                                                    |            |
|----------|------------------------------------------------------------------------------------|------------|
| 5.9      | Exploratory Factor Analysis - MIQ Items - Including Supplementary Items . . . . .  | 134        |
| 5.10     | Exploratory Factor Analysis - SOQ Items - Including Supplementary Items . . . . .  | 135        |
| 5.11     | Exploratory Factor Analysis - TCS Items - Including Supplementary Items . . . . .  | 136        |
| 5.12     | Exploratory Factor Analysis - OSRI Items - Including Supplementary Items . . . . . | 137        |
| 5.13     | Exploratory Factor Analysis - MSPD Items - Including Supplementary Items . . . . . | 138        |
| 5.14     | Principal Component Analysis - All Items . . . . .                                 | 141        |
| <b>6</b> | <b>MGSI Robustness Tests</b>                                                       | <b>144</b> |

# 1. Literature Review

Here, we summarize key measures of gender, sexuality, and discrimination from the literature relevant to our study. These include widely used tools like the Bem Sex Role Inventory (BSRI) for masculinity and femininity, modern instruments such as the Multi-Gender Identity Questionnaire, and scales that assess sexual orientation, like the Kinsey Scale. Others, like the Multidimensional Scales of Perceived Discrimination, focus on discrimination and microaggressions. Collectively, these tools reflect the evolving complexity of measuring their respective constructs in social science research.

## 1.1. Gender

Research on gender identity has advanced considerably, resulting in various tools to measure masculinity, femininity, and nonbinary experiences. One of the earliest and still most widely used tools is the **BSRI** of Bem (1974). The BSRI is a 60-item scale that measures masculinity and femininity as independent dimensions, using traits traditionally categorized as masculine, feminine, or neutral. Participants rate themselves on seven-point Likert scales, providing a nuanced view of their gender roles. The BSRI laid the groundwork for later scales and highlighted the importance of identifying between masculinity and femininity, moving away from the traditional unidimensional approach of viewing them as opposite ends of a spectrum. The **Personal Attributes Questionnaire (PAQ)** (Helmreich et al., 1981) built on the BSRI but classified traits into three subscales: Masculine, Feminine, and Masculine-Feminine. This scale also used Likert-type scales to measure these traits, contributing to early discussions about how gender roles are socially constructed and expressed. Piasenti and Süer (2024) developed a continuous scale for measuring gender identity by starting with an expanded inventory of 90 attributes, combining items from the BSRI with additional items. These attributes were categorized as feminine, masculine, or neutral across the following contexts: desirability and gender norms in society at large and in the workplace. The authors measured economic behaviors such as confidence, risk preferences, altruism, and competition and collected participants' self-ratings on the attribute. This process resulted in a two-dimensional scale with separate femininity and masculinity scores.

In response to changing societal views on gender, De Roover and Vermunt (2019) developed the **Open Sex Role Inventory (OSRI)** as a more contemporary adaptation of the BSRI. This scale introduces more modern conceptions of masculine and feminine characteristics by proposing statements like “I like guns” (masculine) and “I have kept a personal journal” (feminine). Like its predecessor, the OSRI uses a seven-point Likert scale, but its updated items reflect more current gender stereotypes, offering more relevance to modern populations. Similarly, the **Gender-Related Attributes Scale (GRAS)** (Gruber et al., 2019) extends these earlier inventories by including both personality traits and cognitive abilities and interests associated with male or female gender roles. This extension acknowledges the diversity of gender expression beyond personality characteristics alone.

Recent research highlights the importance of assessing gender identity along multiple dimensions rather than just using masculinity and femininity. The **Two-Dimensional Magliozzi Scale** (Magliozzi et al., 2016) measures both self-perceived masculinity and femininity (“how do you see yourself?”) and how others perceive the individual (“how do most people see you?”), reflecting the social complexity of gender identity. However, some researchers emphasize the value of unidimensional approaches. For example, the **Traditional Masculinity Femininity Scale** (Kachel et al., 2016) uses a seven-point scale from “very masculine” to “very feminine”, focusing on traditional gender roles. The **Single-Item Continuous Gender Identity** scale (Brenøe et al., 2022) similarly uses a seven-point scale to gauge both self-perception and where respondents believe others would place them on the gender spectrum.

To address the growing recognition of nonbinary and fluid gender identities, the **Multi-Gender Identity**

**Questionnaire** by Jacobson and Joel (2018) includes 24 questions that assess experiences of feeling like a woman, man, both, neither, or transitioning between these identities. This scale helps capture the complexity of gender identity beyond the binary framework, making it particularly relevant for nonbinary and gender-fluid individuals. In a similar vein, the **Genderqueer Identity Scale** developed by McGuire et al. (2019) focuses on how people experience their gender as male, female, or neither. With 23 items, it explores nonbinary experiences in depth, offering an important tool for research on gender diversity. For transgender individuals, measures of gender congruence—how aligned one feels with their gender identity—are crucial. The **Transgender Congruence Scale** by Kozee et al. (2012) assesses the congruence between a participant’s appearance and their gender identity. This 12-item scale provides insights into the comfort levels and satisfaction transgender individuals experience with their gender presentation and contributes to understanding transgender well-being.

## 1.2. Sexuality

Research on measuring sexuality has evolved to capture a broad range of experiences, including sexual behaviors, attraction, and identity. One of the foundational tools in this area is the **Kinsey Scale** developed by Kinsey et al. (1949), which assesses sexual behavior on a continuum from exclusively heterosexual (0) to exclusively homosexual (6). This simple yet effective measure paved the way for more comprehensive scales. Building on the Kinsey Scale, the **Klein Sexual Orientation Grid** by Klein et al. (1985) introduces a more detailed approach by assessing sexual orientation across multiple dimensions, such as sexual attraction, behavior, fantasies, and emotional and social preferences. It offers a more nuanced scoring system, ranging from 1 (other sex only/heterosexual) to 7 (same-sex only/homosexual), providing a broader understanding of sexual orientation.

To assess sexual fantasies, attraction, behavior, and romantic relationships, the **Sexual Orientation Questionnaire** (Jacobson and Joel, 2018) includes eight questions, repeated once for women and once for men, giving a clear distinction between different gender-related experiences in sexuality. For those focusing specifically on sexual identity within the LGBTQ+ community, the **Lesbian, Gay, and Bisexual Identity Scale** by Mohr and Kendra (2011) offers a more specific tool. It contains 27 items rated on a six-point scale, providing insight into sexual identity development and expression across different contexts.

## 1.3. Discrimination

Research on discrimination has led to the development of several scales that capture both experienced discrimination and underlying beliefs about gender and sexuality. The **Multidimensional Scale of Perceived Discrimination** (Molero et al., 2013) assesses four dimensions of perceived discrimination: blatant group discrimination, subtle group discrimination, blatant individual discrimination, and subtle individual discrimination, providing a comprehensive understanding of how individuals experience discrimination. Similarly, the **Heterosexist Harassment, Rejection, and Discrimination Scale** developed by Szymanski (2006) measures the frequency with which sexual minorities encountered harassment and discrimination due to their sexual orientation over the past year.

In addition to measuring experienced discrimination, scales such as the **Internalized Homophobia Scale** (Herek et al., 1998) focus on beliefs and attitudes, assessing internalized negative perceptions among lesbian, gay, and bisexual individuals through nine items rated on a 5-point scale. The **Gender Role Belief Scale** by Kerr and Holden (1996) evaluates individuals’ beliefs about gender roles, with higher scores indicating more progressive views and lower scores suggesting adherence to traditional gender ideologies.

Microaggressions also play a significant role in the experiences of marginalized groups. The **Gendered Racial Microaggressions Scale** (Lewis and Neville, 2015) examines the lifetime frequency and stress appraisal of gendered racial microaggressions. In contrast, the **Sexual Orientation Microaggressions Scale** by Nadal (2019) assesses the prevalence of microaggressions related to sexual orientation in the past six months. Moreover, the **Nonbinary Gender Microaggressions Scale** of Croteau and Morrison (2023) focuses explicitly on the experiences of nonbinary individuals regarding microaggressions. Lastly, the **Gender Congruence and Life Satisfaction Scale** (Jones et al., 2019) measures gender congruence and related mental well-being, highlighting the intersection of discrimination, identity, and life satisfaction for those undergoing gender-affirming interventions.

## 2. Theoretical Background

Gender differences in social behavior have long been a central topic in psychology and sociology, shaped by societal roles and expectations based on an individual's gender. As an early starting point, *Sex Role Theory* of Parsons (1942) is rooted in a binary understanding of sex, categorizing individuals into two distinct categories: male and female. Moreover, it designates roles, behaviors, and expectations associated with being male or female in a given culture or society, describing the division of labor between husbands and wives as a specialization of men in task-oriented (or instrumental) behavior and of women in socio-emotional (or expressive) behavior.

Bem (1974) significantly contributed to Sex Role Theory by introducing the concept of androgyny, challenging the traditional gender roles by showing that individuals could possess a mix of gender-typical and gender-atypical traits. She developed the BSRI, the most commonly used and repeatedly validated measure of gender roles. The BSRI includes 60 dichotomous items divided into three categories of 20 items each: masculine, feminine and androgyny. Bem (1974) hypothesized that "many individuals might conceive of themselves as androgynous"; that is, they might be both masculine and feminine depending on the situational appropriateness of these behaviors" (Bem, 1974, p.155). Androgyny, as measured by the BSRI, suggests that individuals could possess a mix of both traditionally "masculine" and "feminine" traits. Thus, the inventory acknowledges that people are not limited to adhering strictly to one set of gender-stereotyped characteristics. Instead, individuals can express diverse qualities and behaviors that do not conform with traditional gender norms.

This shift towards androgyny marks a significant turning point in gender theory. It provides empirical evidence that individuals may exhibit a combination of traits traditionally associated with men and women. This realization challenges the notion that gender roles are fixed and inherent, opening up space for a more nuanced understanding of gender as a multidimensional and dynamic concept. *Social Role Theory* of Eagly (1987), for example, implies that each gender/sex is expected to possess characteristics suited for the tasks they typically undertake.

These expectations encompass both the preferred and the typical attributes of men and women. For example, women who predominantly occupy roles demanding communal, domestic, or subordinate behaviors develop stereotypes associated with women's gender roles. Conversely, men who mostly occupy roles demanding agentic, resource acquisition, or dominant behaviors develop stereotypes associated with men's gender roles. Eagly (1987) acknowledges that gender is not solely determined by sex, emphasizing the impact of social roles and expectations, suggesting that societal expectations influence behavior, leading individuals to conform to gender-stereotypic expectations in their interactions.

A large body of evidence demonstrates that in terms of traits, abilities, interests and behaviors, men and women do not clearly fall into two distinct categories (Egan and Perry, 2001; Hyde et al., 2019; Jacobson and Joel, 2018). Gender identity is a complex social concept that should not and cannot be measured unidimensionally, and general self-declarations of femininity or masculinity as a form of gender

typification are insufficient, because many factors moderate these multidimensional categories. In conclusion, the development of modern gender theory has significantly advanced our understanding of gender beyond the limitations of binary frameworks, emphasizing the nature of gender, and critiquing the societal norms that shape gender identity and expression. The mentioned studies were instrumental in advancing the field of gender studies and providing a more inclusive and nuanced perspective on gender that acknowledges the diversity and complexity of human experiences, highlighting the importance of a multidimensional assessment of gender.

### 3. Survey Instructions and Coding

#### 3.1. Demographic Questions

1. What sex were you registered with at birth?  
Female, Male, None of the aforementioned options
2. Which gender do you self-identify with?  
Woman, Man, Non-binary, Transman, Transwoman, None of the aforementioned options
3. What is your age?  
[Please enter only numbers in this field]
4. How would you describe your level of religiosity?  
Very religious, Moderately religious, Slightly religious, Not at all religious, None of the aforementioned options
5. What is your religious affiliation?  
Christianity, Islam, Hinduism, Buddhism, Judaism, Sikhism, Atheism, None of the aforementioned options
6. Which ethnic group do you identify with?  
Caucasian/White, African American/Black, Hispanic/Latino, Asian/Pacific Islander, Native American/Alaska Native, Mixed Ethnicity, None of the aforementioned options
7. Which of these is the highest level of education you have completed?  
No formal qualifications, Secondary education (e.g. GED/GCSE), High school diploma/A-levels, Technical/community college, Undergraduate degree (BA/BSc/other), Graduate degree (MA/MSc/MPhil/other), Doctoral degree (PhD/other), None of the aforementioned options
8. What is your current occupation?  
Full-Time, Part-Time, Due to start a new job within the next month, Unemployed (and job seeking), Not in paid work (e.g. homemaker, retired or disabled), None of the aforementioned options
9. What is your personal income per year (after tax) in USD?  
Less than \$ 10,000, \$ 10,000 - \$ 19,999, \$ 20,000 - \$ 29,999, \$ 30,000 - \$ 39,999, \$ 40,000 - \$ 49,999, \$ 50,000 - \$ 59,999, \$ 60,000 - \$ 69,999, \$ 70,000 - \$ 79,999, \$ 80,000 - \$ 89,999, \$ 90,000 - \$ 99,999, more than \$ 100,000, None of the aforementioned options
10. What is your relationship/marital status?  
Single, In a relationship, Engaged, Married, Widowed, Divorced, Separated, Never married, In a civil partnership/union or similar, None of the aforementioned options

11. How many dependents do you have?  
None, 1, 2, 3, 4, 5 or more, None of the aforementioned options
12. Which sexual orientation category resonates with your internal sense of self?  
Heterosexual, Bisexual, Homosexual, Pansexual, Asexual, None of the aforementioned options

*The following information is not disclosed to participants and is solely included for clarification purposes: If conditions are specified for a question, they are explained in the footnotes. If no conditions are specified, the question is directed to all participants. If a question is crossed out, it indicates that it did not meet the condition described in Section 2.*

*To conserve space and avoid repetition, the answer options for the subsection Multi-Gender Identity Questionnaire are provided once and referred to for all subsequent questions. They are: Always, Very often, Often, Quite often, Sometimes, Occasionally, Rarely, Very rarely, Almost never, Never, Does not apply*

### **3.2. Multi-Gender Identity Questionnaire (MIQ)**

1. In the past 12 months, have you felt satisfied being a woman?<sup>1</sup>
2. In the past 12 months, have you felt satisfied being a transwoman?<sup>1</sup>
3. In the past 12 months, have you felt satisfied being a man?<sup>1</sup>
4. In the past 12 months, have you felt satisfied being a transman?<sup>1</sup>
5. In the past 12 months, have you felt satisfied being non-binary?<sup>1</sup>
- ~~6. In the past 12 months, have you thought of yourself as a woman?~~
- ~~7. In the past 12 months, have you thought of yourself as a man?~~
- ~~8. In the past 12 months, have you felt that you have to work at being a woman?~~
- ~~9. In the past 12 months, have you felt that you have to work at being a man?~~
- ~~10. In the past 12 months, have you felt pressured by others to be a “proper” woman?~~
- ~~11. In the past 12 months, have you felt pressured by others to be a “proper” man?~~
12. In the past 12 months, have you felt that you were a “real” woman?<sup>2</sup>
13. In the past 12 months, have you felt that you were a “real” man?<sup>3</sup>
- ~~14. In the past 12 months, when you went into a department store to buy yourself clothing, did you shop in a department labeled for your sex?~~
15. In the past 12 months, have you worn clothes typically associated with females, such as skirts or dresses?
16. In the past 12 months, have you worn clothes typically associated with males, such as pants or suits?
17. In the past 12 months, have you felt more like a man than like a woman?<sup>2</sup>

---

<sup>1</sup> This is contingent on the response to Question 2 in the Demographic section.

<sup>2</sup> All participants must answer, except those who choose “man” in Question 2 of the Demographic section.

<sup>3</sup> All participants must answer, except those who choose “woman” in Question 2 of the Demographic section.

18. In the past 12 months, have you felt more like a woman than like a man?<sup>3</sup>
19. Please select “Very often” for this question.
20. In the past 12 months, have you sometimes felt like a man and sometimes like a woman?
21. In the past 12 months, have you felt somewhere in between a woman and a man?
22. ~~In the past 12 months, have there been times when you have felt that you are neither a man nor a woman?~~
23. ~~In the past 12 months, have you felt that it would be better for you to live as a man than as a woman?~~
24. ~~In the past 12 months, have you felt that it would be better for you to live as a woman than as a man?~~
25. In the past 12 months, have you had the wish or desire to be a woman?<sup>3</sup>
26. In the past 12 months, have you had the wish or desire to be a man?<sup>2</sup>
27. In the past 12 months, have you disliked your body because of its female form?<sup>4</sup>
28. In the past 12 months, have you disliked your body because of its male form?<sup>4</sup>
29. In the past 12 months, have you wished you had the physique or body characteristics typically associated with males?<sup>5</sup>
30. In the past 12 months, have you wished you had the physique or body characteristics typically associated with females?<sup>6</sup>
31. Summary Item: In the past 12 months, have you felt contentment with your own gender?
32. Expectation Item: If you think about your self-perceptions of your gender, how much do you feel as a woman?
33. Expectation Item: If you think about your self-perceptions of your gender, how much do you feel as a man?

*To conserve space and avoid repetition, the answer options for the subsection Transgender Congruence Scale will be provided once and referred to for all subsequent questions. They are:*

Agree very strongly, Agree strongly, Agree moderately, Agree slightly, Agree, Disagree, Disagree slightly, Disagree moderately, Disagree strongly, Disagree very strongly, Does not apply

### **3.3. Transgender Congruence Scale (TCS)**

1. My outward appearance represents my gender identity.
2. ~~I experience a sense of unity between my gender identity and my body.~~
3. ~~My physical appearance adequately expresses my gender identity.~~
4. ~~I am generally comfortable with how others perceive my gender identity when they look at me.~~

---

<sup>4</sup> This is contingent on the response to Question 1 in the Demographic section.

<sup>5</sup> All participants must answer, except those who choose “male” in Question 1 of the Demographic section.

<sup>6</sup> All participants must answer, except those who choose “female” in Question 1 of the Demographic section.

5. ~~My physical body represents my gender identity.~~
6. ~~The way my body currently looks does not represent my gender identity.~~
7. Please select “Disagree moderately” for this question.
8. I am happy with the way my appearance expresses my gender identity.
9. ~~I do not feel that my appearance reflects my gender identity.~~
10. I feel that my mind and body are consistent with one another.
11. ~~I am not proud of my gender identity.~~
12. I am happy that I have the gender identity that I do.
13. I have accepted my gender identity.
14. Summary Item: My external gender identity (e.g., my body, outward appearance, or how I dress) represents my gender identity.
15. Expectation Item: If I think about the external representation of my gender, I feel like a woman.
16. Expectation Item: If I think about the external representation of my gender, I feel like a man.

*To conserve space and avoid repetition, the answer options for the subsection Multidimensional Scale of Perceived Discrimination will be provided once and referred to for all subsequent questions. They are: Agree very strongly, Agree strongly, Agree moderately, Agree slightly, Agree, Disagree, Disagree slightly, Disagree moderately, Disagree strongly, Disagree very strongly, Does not apply*

### **3.4. Multidimensional Scale of Perceived Discrimination (MSPD)**

1. In society, men are visibly rejected.
2. In society, women are visibly rejected.
3. In society, transwomen are visibly rejected.
4. In society, transmen are visibly rejected.
5. In society, non-binary individuals are visibly rejected.
6. Society treats men unfairly.
7. Society treats women unfairly.
8. Society treats transwomen unfairly.
9. Society treats transmen unfairly.
10. Society treats non-binary individuals unfairly.
11. Men suffer from occupational discrimination.
12. Women suffer from occupational discrimination.
13. Transwomen suffer from occupational discrimination.
14. Transmen suffer from occupational discrimination.

15. Non-binary individuals suffer from occupational discrimination.
16. Men suffer from discrimination in the health sphere.
17. Women suffer from discrimination in the health sphere.
18. Transwomen suffer from discrimination in the health sphere.
19. Transmen suffer from discrimination in the health sphere.
20. Non-binary individuals suffer from discrimination in the health sphere.
21. ~~Men suffer from discrimination in the legal sphere.~~
22. ~~Women suffer from discrimination in the legal sphere.~~
23. Men suffer from rejection in their daily social relations.
24. women suffer from rejection in their daily social relations.
25. Transwomen suffer from rejection in their daily social relations.
26. Transmen suffer from rejection in their daily social relations.
27. Non-binary individuals suffer from rejection in their daily social relations.
28. Men suffer from discrimination by some private institutions (e.g., banks, insurance companies, etc.)
29. Women suffer from discrimination by some private institutions (e.g., banks, insurance companies, etc.)
30. Transwomen suffer from discrimination by some private institutions (e.g., banks, insurance companies, etc.)
31. Transmen suffer from discrimination by some private institutions (e.g., banks, insurance companies, etc.)
32. Non-binary individuals suffer from discrimination by some private institutions (e.g., banks, insurance companies, etc.)
33. Society mistrusts men.
34. Society mistrusts women.
35. Society mistrusts transwomen.
36. Society mistrusts transmen.
37. Society mistrusts non-binary individuals.
38. Even when people seem to accept men, I think that, deep down, they have some misgivings.
39. Even when people seem to accept women, I think that, deep down, they have some misgivings.
40. Even when people seem to accept transwomen, I think that, deep down, they have some misgivings.
41. Even when people seem to accept transmen, I think that, deep down, they have some misgivings.
42. Even when people seem to accept non-binary individuals, I think that, deep down, they have some misgivings.

43. Even though there is no express rejection, people treat men differently.
44. Even though there is no express rejection, people treat women differently.
45. Even though there is no express rejection, people treat transwomen differently.
46. Even though there is no express rejection, people treat transmen differently.
47. Even though there is no express rejection, people treat non-binary individuals differently.
48. I have felt personally rejected for being a man.<sup>1</sup>
49. I have felt personally rejected for being a woman.<sup>1</sup>
50. I have felt personally rejected for being a transwoman.<sup>1</sup>
51. I have felt personally rejected for being a transman.<sup>1</sup>
52. I have felt personally rejected for being a non-binary individual.<sup>1</sup>
53. I have been treated unfairly for being a man.<sup>1</sup>
54. I have been treated unfairly for being a woman.<sup>1</sup>
55. I have been treated unfairly for being a transman.<sup>1</sup>
56. I have been treated unfairly for being a transwoman.<sup>1</sup>
57. I have been treated unfairly for being a non-binary individual.<sup>1</sup>
58. I have been discriminated at work for being a man.<sup>1</sup>
59. I have been discriminated at work for being a woman.<sup>1</sup>
60. I have been discriminated at work for being a transwoman.<sup>1</sup>
61. I have been discriminated at work for being a transman.<sup>1</sup>
62. I have been discriminated at work for being a non-binary individual.<sup>1</sup>
63. I have been discriminated in the health sphere for being a man.<sup>1</sup>
64. I have been discriminated in the health sphere for being a woman.<sup>1</sup>
65. I have been discriminated in the health sphere for being a transwoman.<sup>1</sup>
66. I have been discriminated in the health sphere for being a transman.<sup>1</sup>
67. I have been discriminated in the health sphere for being a non-binary individual.<sup>1</sup>
68. I have been discriminated in the legal sphere for being a man.<sup>1</sup>
69. I have been discriminated in the legal sphere for being a woman.<sup>1</sup>
70. I have been discriminated in the legal sphere for being a transwoman.<sup>1</sup>
71. I have been discriminated in the legal sphere for being a transman.<sup>1</sup>
72. I have been discriminated in the legal sphere for being a non-binary individual.<sup>1</sup>
73. I have been rejected in my daily social relations for being a man.<sup>1</sup>

74. I have been rejected in my daily social relations for being a woman.<sup>1</sup>
75. I have been rejected in my daily social relations for being a transwoman.<sup>1</sup>
76. I have been rejected in my daily social relations for being a transman.<sup>1</sup>
77. I have been rejected in my daily social relations for being a non-binary individual.<sup>1</sup>
78. I have been the target of discriminatory actions by some private institution (e.g., banks, insurance companies, etc.) for being a man.<sup>1</sup>
79. I have been the target of discriminatory actions by some private institution (e.g., banks, insurance companies, etc.) for being a woman.<sup>1</sup>
80. I have been the target of discriminatory actions by some private institution (e.g., banks, insurance companies, etc.) for being a transwoman.<sup>1</sup>
81. I have been the target of discriminatory actions by some private institution (e.g., banks, insurance companies, etc.) for being a transman.<sup>1</sup>
82. I have been the target of discriminatory actions by some private institution (e.g., banks, insurance companies, etc.) for being a non-binary individual.<sup>1</sup>
83. Even when people seem to accept me, deep down, I think they have some misgivings because I am a man.<sup>1</sup>
84. Even when people seem to accept me, deep down, I think they have some misgivings because I am a woman.<sup>1</sup>
85. Even when people seem to accept me, deep down, I think they have some misgivings because I am a transwoman.<sup>1</sup>
86. Even when people seem to accept me, deep down, I think they have some misgivings because I am a transman.<sup>1</sup>
87. Even when people seem to accept me, deep down, I think they have some misgivings because I am a non-binary individual.<sup>1</sup>
88. Even though there is no express rejection, people treat me differently when they see I am a man.<sup>1</sup>
89. Even though there is no express rejection, people treat me differently when they see I am a woman.<sup>1</sup>
90. Even though there is no express rejection, people treat me differently when they see I am a transwoman.<sup>1</sup>
91. Even though there is no express rejection, people treat me differently when they see I am a transman.<sup>1</sup>
92. Even though there is no express rejection, people treat me differently when they see I am a non-binary individual.<sup>1</sup>
93. I feel that people mistrust me for being a man.<sup>1</sup>
94. I feel that people mistrust me for being a woman.<sup>1</sup>
95. I feel that people mistrust me for being a transwoman.<sup>1</sup>
96. I feel that people mistrust me for being a transman.<sup>1</sup>

97. I feel that people mistrust me for being a non-binary individual.<sup>1</sup>
98. Summary Item: I feel discriminated by others based on my gender.
99. Expectation Item: If I think about how I am perceived by others, others discriminate against me because I am a man.<sup>1</sup>
100. Expectation Item: If I think about how I am perceived by others, others discriminate against me because I am a woman.<sup>1</sup>
101. Expectation Item: If I think about how I am perceived by others, others discriminate against me because I am a transwoman.<sup>1</sup>
102. Expectation Item: If I think about how I am perceived by others, others discriminate against me because I am a transman.<sup>1</sup>
103. Expectation Item: If I think about how I am perceived by others, others discriminate against me because I am a non-binary individual.<sup>1</sup>

*To conserve space and avoid repetition, the answer options for the subsection Open Sex Role Inventory will be provided once and referred to for all subsequent questions. They are:*

Always, Very often, Often, Quite Often, Sometimes, Occasionally, Rarely, Very rarely, Almost never, Never, Does not apply

### **3.5. Open Sex Role Inventory (OSRI)**

1. ~~I have studied how to win at gambling.~~
2. ~~I have thought about dying my hair.~~
3. I have thrown knives, axes or other sharp things.
4. I give people handmade gifts.
5. ~~I have day dreamed about saving someone from a burning building.~~
6. I get embarrassed when people read things I have written.
7. ~~I have been very interested in historical wars.~~
8. ~~I know the birthdays of my friends.~~
9. ~~I like guns.~~
10. I am happiest when I am in my bed.
11. ~~I did not work very hard in school.~~
12. ~~I use lotion on my hands.~~
13. I would prefer a class in mathematics to a class in pottery.
14. ~~I dance when I am alone.~~
15. I have thought it would be exciting to be an outlaw.
16. When I was a child, I put on fake concerts and plays with my friends.

17. I have considered joining the military.
18. I get dizzy when I stand up sharply.
19. ~~I do not think it is normal to get emotionally upset upon hearing about the deaths of people you did not know.~~
20. ~~I sometimes feel like crying when I get angry.~~
21. ~~I do not remember birthdays.~~
22. ~~I save the letters I get.~~
23. ~~I playfully insult my friends.~~
24. ~~I oppose medical experimentation with animals.~~
25. ~~I could do an impressive amount of push ups.~~
26. ~~I jump up and down in excitement sometimes.~~
27. I think a natural disaster would be kind of exciting.
28. I wear a blanket around the house.
29. ~~I have burned things up with a magnifying glass.~~
30. I think horoscopes are fun.
31. ~~I don't pack much luggage when I travel.~~
32. ~~I have thought about becoming a vegetarian.~~
33. ~~I hate shopping.~~
34. ~~I have kept a personal journal.~~
35. I have taken apart machines just to see how they work.
36. I take lots of pictures of my activities.
37. Please select "Agree" for this question.
38. ~~I have played a lot of video games.~~
39. ~~I leave nice notes for people now and then.~~
40. I have set fuels, aerosols or other chemicals on fire, just for fun.
41. I really like dancing.
42. I take stairs two at a time.
43. ~~I bake sweets just for myself sometimes.~~
44. ~~I think a natural disaster would be kind of exciting.~~
45. I decorate my things (e.g. stickers on laptop).
46. Summary Item: I prefer adventurous group activities to cautious individual activities.

47. Expectation Item: My gender identity matches contemporary gender stereotypes assigned by friends, family, co-workers, and others, as well as those imposed by political, educational, media, medical, cultural and social institutions.

*The answer options for each question in the subsection Sexual Orientation Questionnaire will be provided separately, as they vary across this section.*

### **3.6. Sexual Orientation Questionnaire (SOQ)**

1. In the past 12 months, have your romantic relationships been with men?  
Always, Very often, Often, Quite Often, Sometimes, Occasionally, Rarely, Very rarely, Almost never, Never, I have never had romantic relationships
2. In the past 12 months, have your romantic relationships been with transmen?  
Always, Very often, Often, Quite Often, Sometimes, Occasionally, Rarely, Very rarely, Almost never, Never, I have never had romantic relationships
3. In the past 12 months, have your romantic relationships been with women?  
Always, Very often, Often, Quite Often, Sometimes, Occasionally, Rarely, Very rarely, Almost never, Never, I have never had romantic relationships.
4. In the past 12 months, have your romantic relationships been with transwomen?  
Always, Very often, Often, Quite Often, Sometimes, Occasionally, Rarely, Very rarely, Almost never, Never, I have never had romantic relationships
5. In the past 12 months, have your romantic relationships been with non-binary individuals?  
Always, Very often, Often, Quite Often, Sometimes, Occasionally, Rarely, Very rarely, Almost never, Never, I have never had romantic relationships
6. In the past 12 months, when you felt sexually attracted, was this to men?  
Always, Very often, Often, Quite Often, Sometimes, Occasionally, Rarely, Very rarely, Almost never, Never, Does not apply
7. In the past 12 months, when you felt sexually attracted, was this to transmen?  
Always, Very often, Often, Quite Often, Sometimes, Occasionally, Rarely, Very rarely, Almost never, Never, Does not apply
8. In the past 12 months, when you felt sexually attracted, was this to women?  
Always, Very often, Often, Quite Often, Sometimes, Occasionally, Rarely, Very rarely, Almost never, Never, Does not apply
9. In the past 12 months, when you felt sexually attracted, was this to transwomen?  
Always, Very often, Often, Quite Often, Sometimes, Occasionally, Rarely, Very rarely, Almost never, Never, Does not apply
10. In the past 12 months, when you felt sexually attracted, was this to non-binary individuals?  
Always, Very often, Often, Quite Often, Sometimes, Occasionally, Rarely, Very rarely, Almost never, Never, Does not apply
11. In the past 12 months, when you had sex, was it with men?  
Always, Very often, Often, Quite Often, Sometimes, Occasionally, Rarely, Very rarely, Almost never, Never, I have never had sex

12. In the past 12 months, when you had sex, was it with transmen?  
Always, Very often, Often, Quite Often, Sometimes, Occasionally, Rarely, Very rarely, Almost never, Never, I have never had sex
13. In the past 12 months, when you had sex, was it with women?  
Always, Very often, Often, Quite Often, Sometimes, Occasionally, Rarely, Very rarely, Almost never, Never, I have never had sex
14. In the past 12 months, when you had sex, was it with transwomen?  
Always, Very often, Often, Quite Often, Sometimes, Occasionally, Rarely, Very rarely, Almost never, Never, I have never had sex
15. In the past 12 months, when you had sex, was it with non-binary individuals?  
Always, Very often, Often, Quite Often, Sometimes, Occasionally, Rarely, Very rarely, Almost never, Never, I have never had sex
16. Summary Item: Over the past 12 months, have you had sexual activities with women?  
Always, Very often, Often, Quite Often, Sometimes, Occasionally, Rarely, Very rarely, Almost never, Never, I have never had sexual activities
17. Summary Item: Over the past 12 months, have you had sexual activities with men?  
Always, Very often, Often, Quite Often, Sometimes, Occasionally, Rarely, Very rarely, Almost never, Never, I have never had sexual activities
18. Summary Item: Over the past 12 months, have you had sexual activities with transwomen?  
Always, Very often, Often, Quite Often, Sometimes, Occasionally, Rarely, Very rarely, Almost never, Never, I have never had sexual activities
19. Summary Item: Over the past 12 months, have you had sexual activities with transmen?  
Always, Very often, Often, Quite Often, Sometimes, Occasionally, Rarely, Very rarely, Almost never, Never, I have never had sexual activities
20. Summary Item: Over the past 12 months, have you had sexual activities with non-binary individuals?  
Always, Very often, Often, Quite Often, Sometimes, Occasionally, Rarely, Very rarely, Almost never, Never, I have never had sexual activities
21. Expectation Item: If you think about your sexual behavior, how much do you feel attracted to women?  
Always, Very often, Often, Quite Often, Sometimes, Occasionally, Rarely, Very rarely, Almost never, Never, Does not apply
22. Expectation Item: If you think about your sexual behavior, how much do you feel attracted to men?  
Always, Very often, Often, Quite Often, Sometimes, Occasionally, Rarely, Very rarely, Almost never, Never, Does not apply
23. Expectation Item: If you think about your sexual behavior, how much do you feel attracted to transwomen?  
Always, Very often, Often, Quite Often, Sometimes, Occasionally, Rarely, Very rarely, Almost never, Never, Does not apply

24. Expectation Item: If you think about your sexual behavior, how much do you feel attracted to transmen?  
Always, Very often, Often, Quite Often, Sometimes, Occasionally, Rarely, Very rarely, Almost never, Never, Does not apply
25. Expectation Item: If you think about your sexual behavior, how much do you feel attracted to non-binary individuals?  
Always, Very often, Often, Quite Often, Sometimes, Occasionally, Rarely, Very rarely, Almost never, Never, Does not apply

### 3.7. Survey Codes

| Code | Items of the Demographic Section                                              |
|------|-------------------------------------------------------------------------------|
| ID   | Please insert your Prolific ID                                                |
| DQ1  | What sex were you registered with at birth?                                   |
| DQ2  | Which gender do you self-identify with?                                       |
| DQ3  | What is your age?                                                             |
| DQ4  | How would you describe your level of religiosity?                             |
| DQ5  | What is your religious affiliation?                                           |
| DQ6  | Which ethnic group do you identify with?                                      |
| DQ7  | Which of these is the highest level of education you have completed?          |
| DQ8  | What is your current occupation?                                              |
| DQ9  | What is your personal income per year (after tax) in USD?                     |
| DQ10 | What is your relationship/marital status?                                     |
| DQ11 | How many dependents do you have?                                              |
| DQ12 | Which sexual orientation category resonates with your internal sense of self? |

Table SF1: Survey Codes - Demographic Section.

| Code  | Items of the Multi-Gender Identity Questionnaire                                                               |
|-------|----------------------------------------------------------------------------------------------------------------|
| MIQ1  | In the past 12 months, have you felt satisfied being a woman?                                                  |
| MIQ1  | In the past 12 months, have you felt satisfied being a transwoman?                                             |
| MIQ1  | In the past 12 months, have you felt satisfied being a man?                                                    |
| MIQ1  | In the past 12 months, have you felt satisfied being a transman?                                               |
| MIQ1  | In the past 12 months, have you felt satisfied being non-binary?                                               |
| MIQ2a | In the past 12 months, have you felt that you were a “real” woman?                                             |
| MIQ2b | In the past 12 months, have you felt that you were a “real” man?                                               |
| MIQ3  | In the past 12 months, have you worn the clothes typically associated with females, such as skirts or dresses? |
| MIQ4  | In the past 12 months, have you worn the clothes typically associated with males, such as pants or suits?      |
| MIQ5a | In the past 12 months, have you felt more like a man than like a woman?                                        |
| MIQ5b | In the past 12 months, have you felt more like a woman than like a man?                                        |
| MIQ6  | In the past 12 months, have you sometimes felt like a man and sometimes like a woman?                          |
| MIQ7  | In the past 12 months, have you felt somewhere in between a woman and a man?                                   |

|        |                                                                                                                        |
|--------|------------------------------------------------------------------------------------------------------------------------|
| MIQ8a  | In the past 12 months, have you had the wish or desire to be a woman?                                                  |
| MIQ8b  | In the past 12 months, have you had the wish or desire to be a man?                                                    |
| MIQ9a  | In the past 12 months, have you disliked your body because of its female form?                                         |
| MIQ9b  | In the past 12 months, have you disliked your body because of its male form?                                           |
| MIQ10a | In the past 12 months, have you wished you had the physique or body characteristics typically associated with males?   |
| MIQ10b | In the past 12 months, have you wished you had the physique or body characteristics typically associated with females? |
| MIQ11  | In the past 12 months, have you felt contentment with your own gender?                                                 |
| MIQ12  | If you think about the self-perception of your gender, how much do you feel as a woman?                                |
| MIQ13  | If you think about the self-perception of your gender, how much do you feel as a man?                                  |

Table SF2: Survey Codes - MIQ Section.

| Code | Items of the Transgender Congruence Scale                                                                      |
|------|----------------------------------------------------------------------------------------------------------------|
| TCS1 | My outward appearance represents my gender identity.                                                           |
| TCS2 | I am happy with the way my appearance expresses my gender identity.                                            |
| TCS3 | I feel that my mind and body are consistent with one another.                                                  |
| TCS4 | I am happy that I have the gender identity that I do.                                                          |
| TCS5 | I have accepted my gender identity.                                                                            |
| TCS6 | My external gender identity (e.g., my body, outward appearance, or how I dress) represents my gender identity. |
| TCS7 | If I think about the external representation of my gender, I feel like a woman.                                |
| TCS8 | If I think about the external representation of my gender, I feel like a man.                                  |

Table SF3: Survey Codes - TCS Section.

| Code   | Items of the Open Sex Role Inventory                                  |
|--------|-----------------------------------------------------------------------|
| OSRI1  | I have thrown knives, axes or other sharp things.                     |
| OSRI2  | I give people handmade gifts.                                         |
| OSRI3  | I get embarrassed when people read things I have written.             |
| OSRI4  | I am happiest when I am in my bed.                                    |
| OSRI5  | I would prefer a class in mathematics to a class in pottery.          |
| OSRI6  | I have thought it would be exciting to be an outlaw.                  |
| OSRI7  | When I was a child, I put on fake concerts and plays with my friends. |
| OSRI8  | I have considered joining the military.                               |
| OSRI9  | I get dizzy when I stand up sharply.                                  |
| OSRI10 | I think a natural disaster would be kind of exciting.                 |
| OSRI11 | I wear a blanket around the house.                                    |
| OSRI12 | I think horoscopes are fun.                                           |
| OSRI13 | I have taken apart machines just to see how they work.                |
| OSRI14 | I take lots of pictures of my activities.                             |
| OSRI15 | I have set fuels, aerosols or other chemicals on fire, just for fun.  |
| OSRI16 | I really like dancing.                                                |

|        |                                                                                                                                                                                                                       |
|--------|-----------------------------------------------------------------------------------------------------------------------------------------------------------------------------------------------------------------------|
| OSRI17 | I take stairs two at a time.                                                                                                                                                                                          |
| OSRI18 | I decorate my things (e.g. stickers on laptop).                                                                                                                                                                       |
| OSRI19 | I prefer adventurous group activities to cautious individual activities.                                                                                                                                              |
| OSRI20 | My gender identity matches contemporary gender stereotypes assigned by friends, family, co-workers, and others, as well as those imposed by political, educational, media, medical, cultural and social institutions. |

Table SF4: Survey Codes - OSRI Section.

| <b>Code</b> | <b>Items of the Sexual Orientation Questionnaire</b>                                               |
|-------------|----------------------------------------------------------------------------------------------------|
| SOQ1a       | In the past 12 months, has/have your romantic relationship(s) been with men?                       |
| SOQ1b       | In the past 12 months, has/have your romantic relationship(s) been with transmen?                  |
| SOQ1c       | In the past 12 months, has/have your romantic relationship(s) been with women?                     |
| SOQ1d       | In the past 12 months, has/have your romantic relationship(s) been with transwomen?                |
| SOQ1e       | In the past 12 months, has/have your romantic relationship(s) been with non-binary individuals?    |
| SOQ2a       | In the past 12 months, when you felt sexually attracted, was this to men?                          |
| SOQ2b       | In the past 12 months, when you felt sexually attracted, was this to transmen?                     |
| SOQ2c       | In the past 12 months, when you felt sexually attracted, was this to women?                        |
| SOQ2d       | In the past 12 months, when you felt sexually attracted, was this to transwomen?                   |
| SOQ2e       | In the past 12 months, when you felt sexually attracted, was this to non-binary individuals?       |
| SOQ3a       | In the past 12 months, when you had sex, was it with men?                                          |
| SOQ3b       | In the past 12 months, when you had sex, was it with transmen?                                     |
| SOQ3c       | In the past 12 months, when you had sex, was it with women?                                        |
| SOQ3d       | In the past 12 months, when you had sex, was it with transwomen?                                   |
| SOQ3e       | In the past 12 months, when you had sex, was it with non-binary individuals?                       |
| SOQ4a       | Over the past 12 months, have you had sexual activities with women?                                |
| SOQ4b       | Over the past 12 months, have you had sexual activities with men?                                  |
| SOQ4c       | Over the past 12 months, have you had sexual activities with transwomen?                           |
| SOQ4d       | Over the past 12 months, have you had sexual activities with transmen?                             |
| SOQ4e       | Over the past 12 months, have you had sexual activities with non-binary individuals?               |
| SOQ5a       | If you think about your sexual behavior, how much do you feel attracted to women?                  |
| SOQ5b       | If you think about your sexual behavior, how much do you feel attracted to men?                    |
| SOQ5c       | If you think about your sexual behavior, how much do you feel attracted to transwomen?             |
| SOQ5d       | If you think about your sexual behavior, how much do you feel attracted to transmen?               |
| SOQ5e       | If you think about your sexual behavior, how much do you feel attracted to non-binary individuals? |

Table SF5: Survey Codes - SOQ Section.

| <b>Code</b> | <b>Items of the Multidimensional Scale of Perceived Discrimination</b> |
|-------------|------------------------------------------------------------------------|
| MSPD1a      | In society, men are visibly rejected.                                  |
| MSPD1b      | In society, women are visibly rejected.                                |
| MSPD1c      | In society, transwomen are visibly rejected.                           |

**Table SF6 – continued from previous page**

| <b>Code</b> | <b>Item</b>                                                                                                              |
|-------------|--------------------------------------------------------------------------------------------------------------------------|
| MSPD1d      | In society, transmen are visibly rejected.                                                                               |
| MSPD1e      | In society, non-binary individuals are visibly rejected.                                                                 |
| MSPD2a      | Society treats men unfairly.                                                                                             |
| MSPD2b      | Society treats women unfairly.                                                                                           |
| MSPD2c      | Society treats transwomen unfairly.                                                                                      |
| MSPD2d      | Society treats transmen unfairly.                                                                                        |
| MSPD2e      | Society treats non-binary individuals unfairly.                                                                          |
| MSPD3a      | Men suffer from occupational discrimination.                                                                             |
| MSPD3b      | Women suffer from occupational discrimination.                                                                           |
| MSPD3c      | Transwomen suffer from occupational discrimination.                                                                      |
| MSPD3d      | Transmen suffer from occupational discrimination.                                                                        |
| MSPD3e      | Non-binary individuals suffer from occupational discrimination.                                                          |
| MSPD4a      | Men suffer from discrimination in the health sphere.                                                                     |
| MSPD4b      | Women suffer from discrimination in the health sphere.                                                                   |
| MSPD4c      | Transwomen suffer from discrimination in the health sphere.                                                              |
| MSPD4d      | Transmen suffer from discrimination in the health sphere.                                                                |
| MSPD4e      | Non-binary individuals suffer from discrimination in the health sphere.                                                  |
| MSPD5a      | Men suffer from rejection in their daily social relations.                                                               |
| MSPD5b      | Women suffer from rejection in their daily social relations.                                                             |
| MSPD5c      | Transwomen suffer from rejection in their daily social relations.                                                        |
| MSPD5d      | Transmen suffer from rejection in their daily social relations.                                                          |
| MSPD5e      | Non-binary individuals suffer from rejection in their daily social relations.                                            |
| MSPD6a      | Men suffer from discrimination by some private institutions (e.g., banks, insurance companies, etc.).                    |
| MSPD6b      | Women suffer from discrimination by some private institutions (e.g., banks, insurance companies, etc.).                  |
| MSPD6c      | Transwomen suffer from discrimination by some private institutions (e.g., banks, insurance companies, etc.).             |
| MSPD6d      | Transmen suffer from discrimination by some private institutions (e.g., banks, insurance companies, etc.).               |
| MSPD6e      | Non-binary individuals suffer from discrimination by some private institutions (e.g., banks, insurance companies, etc.). |
| MSPD7a      | Society mistrusts men.                                                                                                   |
| MSPD7b      | Society mistrusts women.                                                                                                 |
| MSPD7c      | Society mistrusts transwomen.                                                                                            |
| MSPD7d      | Society mistrusts transmen.                                                                                              |
| MSPD7e      | Society mistrusts non-binary individuals.                                                                                |
| MSPD8a      | Even when people seem to accept men, I think that, deep down, they have some misgivings.                                 |
| MSPD8b      | Even when people seem to accept women, I think that, deep down, they have some misgivings.                               |
| MSPD8c      | Even when people seem to accept transwomen, I think that, deep down, they have some misgivings.                          |
| MSPD8d      | Even when people seem to accept transmen, I think that, deep down, they have some misgivings.                            |
| MSPD8e      | Even when people seem to accept non-binary individuals, I think that, deep down, they have some misgivings.              |

**Table SF6 – continued from previous page**

| <b>Code</b> | <b>Item</b>                                                                                                                                    |
|-------------|------------------------------------------------------------------------------------------------------------------------------------------------|
| MSPD9a      | Even though there is no express rejection, people treat men differently.                                                                       |
| MSPD9b      | Even though there is no express rejection, people treat women differently.                                                                     |
| MSPD9c      | Even though there is no express rejection, people treat transwomen differently.                                                                |
| MSPD9d      | Even though there is no express rejection, people treat transmen differently.                                                                  |
| MSPD9e      | Even though there is no express rejection, people treat non-binary individuals differently.                                                    |
| MSPD10a     | I have felt personally rejected for being a man.                                                                                               |
| MSPD10b     | I have been treated unfairly for being a man.                                                                                                  |
| MSPD10c     | I have been discriminated at work for being a man.                                                                                             |
| MSPD10d     | I have been discriminated in the health sphere for being a man.                                                                                |
| MSPD10e     | I have been discriminated in the legal sphere for being a man.                                                                                 |
| MSPD10f     | I have been rejected in my daily social relations for being a man.                                                                             |
| MSPD10g     | I have been the target of discriminatory actions by some private institutions (e.g., banks, insurance companies, etc.) for being a man.        |
| MSPD10h     | Even when people seem to accept me, deep down, I think they have some misgivings because I am a man.                                           |
| MSPD10i     | Even though there is no express rejection, people treat me differently when they see I am a man.                                               |
| MSPD10j     | I feel that people mistrust me for being a man.                                                                                                |
| MSPD10k     | I feel discriminated by others based on my gender.                                                                                             |
| MSPD10l     | If I think about how I am perceived by others, others discriminate against me because I am a man.                                              |
| MSPD10a     | I have felt personally rejected for being a woman.                                                                                             |
| MSPD10b     | I have been treated unfairly for being a woman.                                                                                                |
| MSPD10c     | I have been discriminated at work for being a woman.                                                                                           |
| MSPD10d     | I have been discriminated in the health sphere for being a woman.                                                                              |
| MSPD10e     | I have been discriminated in the legal sphere for being a woman.                                                                               |
| MSPD10f     | I have been rejected in my daily social relations for being a woman.                                                                           |
| MSPD10g     | I have been the target of discriminatory actions by some private institutions (e.g., banks, insurance companies, etc.) for being a woman.      |
| MSPD10h     | Even when people seem to accept me, deep down, I think they have some misgivings because I am a woman.                                         |
| MSPD10i     | Even though there is no express rejection, people treat me differently when they see I am a woman.                                             |
| MSPD10j     | I feel that people mistrust me for being a woman.                                                                                              |
| MSPD10k     | I feel discriminated by others based on my gender.                                                                                             |
| MSPD10l     | If I think about how I am perceived by others, others discriminate against me because I am a woman.                                            |
| MSPD10a     | I have felt personally rejected for being a transwoman.                                                                                        |
| MSPD10b     | I have been treated unfairly for being a transwoman.                                                                                           |
| MSPD10c     | I have been discriminated at work for being a transwoman.                                                                                      |
| MSPD10d     | I have been discriminated in the health sphere for being a transwoman.                                                                         |
| MSPD10e     | I have been discriminated in the legal sphere for being a transwoman.                                                                          |
| MSPD10f     | I have been rejected in my daily social relations for being a transwoman.                                                                      |
| MSPD10g     | I have been the target of discriminatory actions by some private institutions (e.g., banks, insurance companies, etc.) for being a transwoman. |

**Table SF6 – continued from previous page**

| <b>Code</b> | <b>Item</b>                                                                                                                                               |
|-------------|-----------------------------------------------------------------------------------------------------------------------------------------------------------|
| MSPD10h     | Even when people seem to accept me, deep down, I think they have some misgivings because I am a transwoman.                                               |
| MSPD10i     | Even though there is no express rejection, people treat me differently when they see I am a transwoman.                                                   |
| MSPD10j     | I feel that people mistrust me for being a transwoman.                                                                                                    |
| MSPD10k     | I feel discriminated by others based on my gender.                                                                                                        |
| MSPD10l     | If I think about how I am perceived by others, others discriminate against me because I am a transwoman.                                                  |
| MSPD10a     | I have felt personally rejected for being a transman.                                                                                                     |
| MSPD10b     | I have been treated unfairly for being a transman.                                                                                                        |
| MSPD10c     | I have been discriminated at work for being a transman.                                                                                                   |
| MSPD10d     | I have been discriminated in the health sphere for being a transman.                                                                                      |
| MSPD10e     | I have been discriminated in the legal sphere for being a transman.                                                                                       |
| MSPD10f     | I have been rejected in my daily social relations for being a transman.                                                                                   |
| MSPD10g     | I have been the target of discriminatory actions by some private institutions (e.g., banks, insurance companies, etc.) for being a transman.              |
| MSPD10h     | Even when people seem to accept me, deep down, I think they have some misgivings because I am a transman.                                                 |
| MSPD10i     | Even though there is no express rejection, people treat me differently when they see I am a transman.                                                     |
| MSPD10j     | I feel that people mistrust me for being a transman.                                                                                                      |
| MSPD10k     | I feel discriminated by others based on my gender.                                                                                                        |
| MSPD10l     | If I think about how I am perceived by others, others discriminate against me because I am a transman.                                                    |
| MSPD10a     | I have felt personally rejected for being a non-binary individual.                                                                                        |
| MSPD10b     | I have been treated unfairly for being a non-binary individual.                                                                                           |
| MSPD10c     | I have been discriminated at work for being a non-binary individual.                                                                                      |
| MSPD10d     | I have been discriminated in the health sphere for being a non-binary individual.                                                                         |
| MSPD10e     | I have been discriminated in the legal sphere for being a non-binary individual.                                                                          |
| MSPD10f     | I have been rejected in my daily social relations for being a non-binary individual.                                                                      |
| MSPD10g     | I have been the target of discriminatory actions by some private institutions (e.g., banks, insurance companies, etc.) for being a non-binary individual. |
| MSPD10h     | Even when people seem to accept me, deep down, I think they have some misgivings because I am a non-binary individual.                                    |
| MSPD10i     | Even though there is no express rejection, people treat me differently when they see I am a non-binary individual.                                        |
| MSPD10j     | I feel that people mistrust me for being a non-binary individual.                                                                                         |
| MSPD10k     | I feel discriminated by others based on my gender.                                                                                                        |
| MSPD10l     | If I think about how I am perceived by others, others discriminate against me because I am a non-binary individual.                                       |

Table SF6: Survey Codes - MSPD Section.

### 3.8. Screenshots

All screenshots of the experiment are accessible at

[https://osf.io/wr5cz/?view\\_only=589a8ee81e164a2ea5ab32e3b9255ed2](https://osf.io/wr5cz/?view_only=589a8ee81e164a2ea5ab32e3b9255ed2) in the survey file.

## 4. Data Analysis

### 4.1. Descriptives

| Category                           | Woman | Non-binary | Man | Transman | Transwoman | Total |
|------------------------------------|-------|------------|-----|----------|------------|-------|
| <b>Sexual Orientation</b>          |       |            |     |          |            |       |
| Pansexual                          | 17    | 75         | 17  | 13       | 7          | 129   |
| Bisexual                           | 75    | 72         | 78  | 32       | 18         | 275   |
| Heterosexual                       | 290   | 10         | 297 | 7        | 3          | 607   |
| Homosexual                         | 25    | 47         | 47  | 20       | 9          | 148   |
| Asexual                            | 11    | 52         | 10  | 13       | 5          | 91    |
| None of the aforementioned options | 8     | 35         | 3   | 7        | 2          | 55    |
| Category Total                     | 426   | 291        | 452 | 92       | 44         | 1,305 |
| <b>Income</b>                      |       |            |     |          |            |       |
| Less than \$10,000                 | 62    | 98         | 62  | 32       | 14         | 268   |
| \$10,000 - \$19,999                | 43    | 53         | 39  | 12       | 5          | 152   |
| \$20,000 - \$29,999                | 36    | 40         | 30  | 10       | 7          | 123   |
| \$30,000 - \$39,999                | 40    | 22         | 45  | 9        | 5          | 121   |
| \$40,000 - \$49,999                | 55    | 27         | 46  | 6        | 6          | 140   |
| \$50,000 - \$59,999                | 35    | 14         | 47  | 6        | 1          | 103   |
| \$60,000 - \$69,999                | 41    | 11         | 33  | 3        | 0          | 88    |
| \$70,000 - \$79,999                | 25    | 7          | 33  | 5        | 2          | 72    |
| \$80,000 - \$89,999                | 24    | 3          | 29  | 3        | 1          | 60    |
| \$90,000 - \$99,999                | 20    | 2          | 15  | 1        | 3          | 41    |
| More than \$100,000                | 41    | 10         | 68  | 3        | 0          | 122   |
| None of the aforementioned options | 4     | 4          | 5   | 2        | 0          | 15    |
| Category Total                     | 426   | 291        | 452 | 92       | 44         | 1,305 |
| <b>Employment Status</b>           |       |            |     |          |            |       |
| Full-Time                          | 239   | 99         | 295 | 36       | 16         | 685   |
| Part-Time                          | 66    | 77         | 67  | 27       | 11         | 248   |
| Unemployed (and job seeking)       | 33    | 53         | 48  | 16       | 10         | 160   |
| Not in paid work                   | 70    | 43         | 21  | 8        | 3          | 145   |
| Due to start a new job             | 6     | 5          | 6   | 1        | 1          | 19    |
| None of the aforementioned options | 12    | 14         | 15  | 4        | 3          | 48    |
| Category Total                     | 426   | 291        | 452 | 92       | 44         | 1,305 |
| <b>Education</b>                   |       |            |     |          |            |       |
| No formal qualifications           | 1     | 6          | 1   | 2        | 3          | 13    |
| Secondary education                | 8     | 9          | 8   | 4        | 4          | 33    |
| High school diploma/A-levels       | 108   | 108        | 122 | 32       | 15         | 385   |
| Technical/community college        | 63    | 33         | 57  | 10       | 3          | 166   |
| Undergraduate degree               | 158   | 101        | 181 | 30       | 16         | 486   |
| Graduate degree                    | 73    | 33         | 70  | 12       | 3          | 191   |
| Doctoral degree                    | 13    | 1          | 12  | 1        | 0          | 27    |
| None of the aforementioned options | 2     | 0          | 1   | 1        | 0          | 4     |

|                                    |     |     |     |    |    |       |
|------------------------------------|-----|-----|-----|----|----|-------|
| Category Total                     | 426 | 291 | 452 | 92 | 44 | 1,305 |
| <b>Ethnicity</b>                   |     |     |     |    |    |       |
| Caucasian/White                    | 268 | 195 | 258 | 59 | 31 | 811   |
| African American/Black             | 82  | 19  | 101 | 15 | 4  | 221   |
| Mixed Ethnicity                    | 16  | 31  | 18  | 5  | 3  | 73    |
| Asian/Pacific Islander             | 30  | 22  | 41  | 7  | 3  | 103   |
| Hispanic/Latino                    | 28  | 20  | 30  | 5  | 2  | 85    |
| Native American/Alaska Native      | 0   | 3   | 2   | 0  | 0  | 5     |
| None of the aforementioned options | 2   | 1   | 2   | 1  | 1  | 7     |
| Category Total                     | 426 | 291 | 452 | 92 | 44 | 1,305 |
| <b>Religion</b>                    |     |     |     |    |    |       |
| Atheism                            | 65  | 106 | 107 | 24 | 14 | 316   |
| Christianity                       | 224 | 28  | 208 | 17 | 12 | 489   |
| Judaism                            | 8   | 10  | 5   | 3  | 2  | 28    |
| Buddhism                           | 5   | 9   | 6   | 1  | 1  | 22    |
| Islam                              | 4   | 1   | 10  | 0  | 0  | 15    |
| Hinduism                           | 1   | 0   | 1   | 1  | 0  | 3     |
| Sikhism                            | 1   | 0   | 1   | 0  | 0  | 2     |
| None of the aforementioned options | 118 | 137 | 114 | 46 | 15 | 430   |
| Category Total                     | 426 | 291 | 452 | 92 | 44 | 1,305 |
| <b>Religiousness</b>               |     |     |     |    |    |       |
| Not at all religious               | 180 | 211 | 206 | 56 | 22 | 675   |
| Slightly religious                 | 91  | 35  | 86  | 16 | 10 | 238   |
| Moderately religious               | 90  | 25  | 106 | 8  | 5  | 234   |
| Very religious                     | 55  | 9   | 48  | 8  | 5  | 125   |
| None of the aforementioned options | 10  | 11  | 6   | 4  | 2  | 33    |
| Category Total                     | 426 | 291 | 452 | 92 | 44 | 1,305 |
| <b>Marital Status</b>              |     |     |     |    |    |       |
| Single                             | 88  | 116 | 176 | 34 | 24 | 438   |
| Married                            | 183 | 57  | 141 | 17 | 4  | 402   |
| In a relationship                  | 74  | 86  | 96  | 30 | 11 | 297   |
| Engaged                            | 12  | 8   | 9   | 4  | 1  | 34    |
| Separated                          | 9   | 1   | 5   | 0  | 1  | 16    |
| Never married                      | 9   | 7   | 5   | 2  | 2  | 25    |
| Divorced                           | 35  | 8   | 16  | 2  | 1  | 62    |
| Widowed                            | 12  | 0   | 0   | 1  | 0  | 13    |
| In a civil partnership/union       | 4   | 7   | 3   | 2  | 0  | 16    |
| None of the aforementioned options | 0   | 1   | 1   | 0  | 0  | 2     |
| Category Total                     | 426 | 291 | 452 | 92 | 44 | 1,305 |

Table SF7: Descriptive Statistics of Demographics.

## 4.2. Replication Analyses - MIQ and SOQ

As noted in Section 4.1, we conducted replication analyses, confirming that our findings align with established research and supporting the suitability of our data for developing the MGSI.

Jacobson and Joel (2018) practiced snowball sampling and recruited cisgender participants based on these three demographic questions:

- Sex at birth: female (male),

- Reared as: girl (boy),
- Current gender: woman (man).

In the study of Jacobson and Joel (2018), participants completed the MIQ and SOQ sequentially. In our study, the participants were pre-screened on Prolific.com to recruit a representative U.S. sample with regard to age, gender, and ethnicity. In total, we had three groups – cisgender female, cisgender male, and non-cisgender individuals – identified based on self-reported information provided during participant registration on Prolific.com. In contrast to Jacobson and Joel (2018), we did not have the classification of “mostly and exclusively hetero- and homosexual”. However, we have additionally the following groups in our data: Non-binary individuals, transman, and transwoman – identified based on self-reported information provided during participation in our survey. Thus, we did not have the same selection options as Jacobson and Joel (2018). Also, we did not merge the answers of the groups of pan-, bi-, and asexual individuals into one category.

| Identity          | Heterosexual | Bisexual | Homosexual | Pansexual | Asexual | Other | Total |
|-------------------|--------------|----------|------------|-----------|---------|-------|-------|
| <b>Woman</b>      | 290          | 75       | 25         | 17        | 11      | 8     | 426   |
| <b>Non-binary</b> | 10           | 72       | 47         | 75        | 52      | 35    | 291   |
| <b>Man</b>        | 297          | 78       | 47         | 17        | 10      | 3     | 452   |
| <b>Transman</b>   | 7            | 32       | 20         | 13        | 13      | 7     | 92    |
| <b>Transwoman</b> | 3            | 18       | 9          | 7         | 5       | 2     | 44    |
| <b>Total</b>      | 607          | 275      | 148        | 129       | 91      | 55    | 1,305 |

Table SF8: Demographic Overview: Sexual Orientations and Gender Identities.

The MIQ has 24 items that are either gender-neutral or presented twice, once as intended for a male participant and once intended for a female participant. We decided to use a more granular scale and ask five instead of two questions for those items at the MIQ that warranted two questions in the original questionnaire. For example, for the first item of the MIQ, we ask: “In the past 12 months, have you felt satisfied being a woman/man/transwoman/transman/non-binary?”. For the data analysis, we consolidated the five gender-related items into a single variable, using gender as the primary categorization. For the analysis of the MIQ scale, we focused on the group born as female (male) and identifying as woman (man) following Jacobson and Joel (2018).

The SOQ has seven items, each in two versions, intended for a male participant and intended for a female participant. In our study, we have five participant groups, but for the data analysis, we consolidated the five gender-related items into a single variable, using gender as the primary categorization. For the analysis of the SOQ, we focused on the group born as female (male) and identifying as a woman (man) as did Jacobson and Joel (2018). The Likert-scale range is reverse coded in our survey compared to the study of Jacobson and Joel. Jacobson and Joel have “Never” (0) to “Always” (4), while we have “Always” (1) to “Never” (10) plus “Does not apply”.

The number of observations for most variables is consistently 1,305, with a slight drop to 1,296 for MIQ9. This is due to missing data for MIQ9, as nine individuals selected “unspecified” for their sex registered at birth, and therefore, the MIQ9 question was not shown to them. The MIQ9 was linked to the sex registered at birth and if this was not selected as either female or male, the participant was not shown the MIQ9. For each SOQ variable, there are 1,305 observations, ensuring a consistent sample size across all items.

## Measures

- In Jacobson and Joel (2018), the variable “feeling-as-a-woman” was a composite variable of “In the past 12 months, have you thought of yourself as a woman?” and “In the past 12 months, have you

felt more like a woman, than like a man?”. In our paper, the item “In the past 12 months, have you thought of yourself as a woman?” was not included, but the supplementary expectation item “If you think about the self-perception of your gender, how much do you feel as a woman?” served as an alternative. For women, we reversed the responses of MIQ5 and created the variable MIQ5\_r. Consequently, we assessed feeling-as-a-woman using the expectation item and MIQ5\_r.

- In Jacobson and Joel (2018), “feeling-as-a-man” was a composite variable of “In the past 12 months, have you thought of yourself as a man?” and “In the past 12 months, have you felt more like a man, than like a woman?”. In our paper, the variable “In the past 12 months, have you thought of yourself as a man?” was not included, but the supplementary expectation item “If you think about the self-perception of your gender, how much do you feel as a man?” served as an alternative. Consequently, we assessed feeling-as-a-man using the expectation item and MIQ5.
- In Jacobson and Joel (2018), the variable “feeling-as-both-genders” was a composite variable of “In the past 12 months, have you sometimes felt like a man and sometimes like a woman?” and “In the past 12 months, have you felt somewhere in between a woman and a man?”. In our paper, we assessed the composite variable in the same way as Jacobson and Joel (2018).
- In Jacobson and Joel (2018), “feeling-as-neither-gender” was assessed using the item “In the past 12 months, have there been times when you have felt that you are neither a man nor a woman?”. This item, however, was not included in our survey, and no similar question was given as an alternative.
- In Jacobson and Joel (2018), satisfied-being-a-woman/man was assessed using the items “In the past 12 months, have you felt satisfied being a woman/man”. In our survey, we merged MIQ1a-e to MIQ1 as we assessed the item based on the self-affirmed gender. When inspecting the group of men, we first filtered the dataset by selecting entries labeled as men in the gender variable and then the entries in MIQ1 to map the question to the respective gender.
- In Jacobson and Joel (2018), the variables “wish-to-be-a-woman” and “wish-to-be-a-man” were assessed using the items “In the past 12 months, have you had the wish or desire to be a man/woman”. In our study, these items (MIQ8a and MIQ8b) were not included in the analysis as we did not have data for all participants. The questions have been directed to particular groups, either women or men, and thus we could not merge them cleanly.
- In Jacobson and Joel (2018), the variable “dislike-my-body-to-its-form” was assessed using the items: “In the past 12 months, have you disliked your body because of its male/female form?” In our survey, we merged MIQ9a: “In the past 12 months, have you disliked your body because of its female form?” and MIQ9b: “In the past 12 months, have you disliked your body because of its male form?” to MIQ9.
- In Jacobson and Joel (2018), wish-to-have-the-body-of-the-other-sex was assessed using the item: “In the past 12 months, have you wished you had the body of the other sex?”. In our survey, the item MIQ10a: “In the past 12 months, have you wished you had the physique or body characteristics typically associated with males?” and the item MIQ10b: “In the past 12 months, have you wished you had the physique or body characteristics typically associated with females?” were merged to MIQ10.
- Like Jacobson and Joel (2018), we calculated the composite same-sex as a mean of the SOQ1a-3a for men. The score was assessed for women as well, using SOQ1c-3c.
- Like Jacobson and Joel (2018), we calculated the composite other-sex as a mean of the SOQ1c-3c for men. We assessed the score for women as well, using SOQ1a-3a.

**Mean and Standard Deviation:** Jacobson and Joel (2018) calculated the mean and standard deviation (SD) of the composite scores of same-sex attraction and other-sex attraction in men and women across the sexual orientation groups.

| Sexual Orientation         | Same-sex |      | Other-sex |      |
|----------------------------|----------|------|-----------|------|
|                            | Mean     | SD   | Mean      | SD   |
| Asexual                    | 4.33     | 3.28 | 3.20      | 2.94 |
| Bisexual                   | 5.90     | 2.87 | 4.45      | 2.79 |
| Heterosexual               | 9.20     | 1.99 | 1.62      | 1.75 |
| Homosexual                 | 2.72     | 2.79 | 8.19      | 2.69 |
| None of the aforementioned | 5.89     | 3.89 | 4.00      | 2.85 |
| Pansexual                  | 5.59     | 2.89 | 4.49      | 2.85 |

Table SF9: Means and SD of composite scores for same- and other-sex interactions across sexual orientation in men.

Table SF9 shows the composite scores for same- and other-sex interactions of men across different sexual orientations. Heterosexual men have the highest scores for same-sex interactions, while their scores for other-sex interactions are very low. In contrast, homosexual men have higher scores for other-sex interactions compared to same-sex interactions. Bi- and pansexual men exhibit higher scores for same-sex interactions, although the differences are not as pronounced as those seen in hetero- and homosexual men.

| Sexual Orientation         | Same-sex |      | Other-sex |      |
|----------------------------|----------|------|-----------|------|
|                            | Mean     | SD   | Mean      | SD   |
| Asexual                    | 7.33     | 3.20 | 5.24      | 3.72 |
| Bisexual                   | 6.41     | 2.87 | 3.08      | 2.53 |
| Heterosexual               | 9.26     | 1.53 | 1.60      | 1.53 |
| Homosexual                 | 3.15     | 2.98 | 8.68      | 2.23 |
| None of the aforementioned | 5.96     | 3.82 | 5.79      | 4.50 |
| Pansexual                  | 5.59     | 3.15 | 3.31      | 3.00 |

Table SF10: Means and SD of composite scores for same- and other-sex interactions across sexual orientation in women.

Table SF10 states the composite scores for same- and other-sex interactions of women across different sexual orientations. Asexual women have higher scores for same-sex interactions compared to their scores for other-sex interactions. Similarly, bisexual women exhibit higher scores for same-sex interactions than for other-sex interactions. In contrast, heterosexual women report very high scores for same-sex interactions but very low scores for other-sex interactions. Homosexual women show lower scores for same-sex interactions but much higher scores for other-sex interactions. Pansexual women display relatively balanced scores between same-sex and other-sex interactions, with slightly higher means and greater variability for same-sex interactions.

### Binary Response Patterns

Jacobson and Joel (2018) report the proportion of participants with a binary response pattern in each sexual orientation group. Many participants had what may be termed “queer” feelings, such as feeling both as a man and as a woman (38%) or as neither (35%), wishing to be the “other” gender (38%), or wishing to have the body of the “other” sex (35%). On the other hand, there were many individuals who had what may be viewed as a “binary” response pattern, such as always feeling like a man and never feeling

like a woman. Thus, a completely binary response pattern for a woman would be: always feeling-like-a-woman, never feeling-like-a-man, never feeling-as-both-genders, never feeling-as-neither-gender, never wishing-to-be-the-“other”-gender, and never wishing-to-have-the-body-of-the-“other”-sex. In our study, Tables SF11 and SF12 present, for men and women, grouped by sexual orientation groups, the proportion of participants with a completely binary response pattern over aspects of gender identity relevant to this binary–non-binary distinction. Thus, a completely binary response pattern for a woman would be: always feeling like a woman, never feeling like a man, never feeling as both genders and never wishing to have the body of the “other” sex. As in Jacobson and Joel (2018), many participants had what may be termed “queer” feelings. As our Likert scale has 11 options, compared to Jacobson and Joel (2018), we mapped 1 and 2 to “Always”, and 9 and 10 to “Never”.

| <b>Sexual Orientation</b>          | <b>Total Count</b> | <b>Binary</b> | <b>Percentage</b> |
|------------------------------------|--------------------|---------------|-------------------|
| Heterosexual                       | 290                | 184           | 43.19             |
| Bisexual                           | 75                 | 32            | 7.51              |
| Homosexual                         | 25                 | 6             | 1.41              |
| Pansexual                          | 17                 | 2             | 0.47              |
| Asexual                            | 11                 | 1             | 0.23              |
| None of the aforementioned options | 8                  | 2             | 0.47              |

Table SF11: Binary Response Patterns Across Sexual Orientations Among Women.

| <b>Sexual Orientation</b>          | <b>Total Count</b> | <b>Binary</b> | <b>Percentage</b> |
|------------------------------------|--------------------|---------------|-------------------|
| Heterosexual                       | 297                | 211           | 46.68             |
| Bisexual                           | 78                 | 25            | 5.53              |
| Homosexual                         | 47                 | 13            | 2.88              |
| Pansexual                          | 17                 | 3             | 0.66              |
| Asexual                            | 10                 | 1             | 0.22              |
| None of the aforementioned options | 3                  | 0             | 0.00              |

Table SF12: Binary Response Patterns Across Sexual Orientations Among Men.

**Correlation coefficients:** In Jacobson and Joel (2018), the correlation coefficients between the composite variables “same-and-other-sex attraction” and “feeling-as-affirmed-gender”, “feeling-as-the-other-gender”, “feeling-as-both-genders”, and “feeling-as-neither-gender” for men and for women, were calculated separately over the entire sample, for the exclusively heterosexual, mostly heterosexual, and bisexual groups (the ExcHet-Bi sub-sample), and over the bisexual, mostly homosexual, and exclusively homosexual groups (the Bi-ExcHom sub-sample). The correlations were small, with none (out of 48) exceeding 0.30. In our study, we calculated the correlations between the composite variables “same-and-other-sex attraction” and “feeling-as-affirmed-gender”, “feeling-as-the-other-gender”, and the MIQ variables for men and for women and over the sexual orientation groups separately (see Tables SF13, SF14, SF15, SF16, SF17, SF18, SF19, SF20, SF21, SF22, SF23 and SF24).

|                      | Same-sex | Other-sex | MIQ1   | MIQ3   | MIQ4   | MIQ5   | MIQ6   | MIQ7   | MIQ9   | MIQ10  | feeling-as-woman | feeling-as-man | feeling-both-genders |
|----------------------|----------|-----------|--------|--------|--------|--------|--------|--------|--------|--------|------------------|----------------|----------------------|
| Same-sex             | 1.000    | -0.514    | -0.110 | -0.131 | 0.147  | 0.179  | 0.120  | 0.158  | 0.203  | 0.320  | -0.207           | 0.153          | 0.144                |
| Other-sex            |          | 1.000     | 0.134  | 0.131  | -0.144 | -0.220 | -0.215 | -0.257 | -0.188 | -0.333 | 0.270            | -0.230         | -0.244               |
| MIQ1                 |          |           | 1.000  | 0.314  | -0.069 | -0.419 | -0.344 | -0.375 | -0.330 | -0.276 | 0.535            | -0.418         | -0.371               |
| MIQ3                 |          |           |        | 1.000  | -0.468 | -0.220 | -0.112 | -0.142 | -0.087 | -0.070 | 0.246            | -0.185         | -0.132               |
| MIQ4                 |          |           |        |        | 1.000  | 0.193  | 0.201  | 0.224  | 0.081  | 0.104  | -0.160           | 0.206          | 0.219                |
| MIQ5                 |          |           |        |        |        | 1.000  | 0.562  | 0.619  | 0.389  | 0.416  | -0.869           | 0.856          | 0.610                |
| MIQ6                 |          |           |        |        |        |        | 1.000  | 0.881  | 0.437  | 0.547  | -0.557           | 0.665          | 0.968                |
| MIQ7                 |          |           |        |        |        |        |        | 1.000  | 0.430  | 0.572  | -0.620           | 0.730          | 0.972                |
| MIQ9                 |          |           |        |        |        |        |        |        | 1.000  | 0.693  | -0.454           | 0.444          | 0.447                |
| MIQ10                |          |           |        |        |        |        |        |        |        | 1.000  | -0.471           | 0.473          | 0.577                |
| feeling-as-woman     |          |           |        |        |        |        |        |        |        |        | 1.000            | -0.799         | -0.607               |
| feeling-as-man       |          |           |        |        |        |        |        |        |        |        |                  | 1.000          | 0.720                |
| feeling-both-genders |          |           |        |        |        |        |        |        |        |        |                  |                | 1.000                |

Table SF13: Correlation Matrix of MIQ Variables for Women.

|                      | Same-sex | Other-sex | MIQ1   | MIQ3   | MIQ4   | MIQ5   | MIQ6   | MIQ7   | MIQ9   | MIQ10  | feeling-as-woman | feeling-as-man | feeling-both-genders |
|----------------------|----------|-----------|--------|--------|--------|--------|--------|--------|--------|--------|------------------|----------------|----------------------|
| Same-sex             | 1.000    | -0.497    | -0.136 | 0.088  | -0.064 | -0.134 | 0.127  | 0.201  | 0.425  | 0.447  | 0.156            | -0.164         | 0.171                |
| Other-sex            |          | 1.000     | 0.132  | -0.098 | 0.158  | 0.216  | -0.129 | -0.213 | -0.316 | -0.327 | -0.191           | 0.263          | -0.178               |
| MIQ1                 |          |           | 1.000  | -0.282 | 0.572  | 0.341  | -0.258 | -0.275 | -0.214 | -0.173 | -0.401           | 0.489          | -0.279               |
| MIQ3                 |          |           |        | 1.000  | -0.404 | -0.422 | 0.406  | 0.397  | 0.243  | 0.211  | 0.419            | -0.431         | 0.422                |
| MIQ4                 |          |           |        |        | 1.000  | 0.371  | -0.311 | -0.242 | -0.142 | -0.087 | -0.361           | 0.498          | -0.292               |
| MIQ5                 |          |           |        |        |        | 1.000  | -0.498 | -0.519 | -0.332 | -0.294 | -0.840           | 0.814          | -0.534               |
| MIQ6                 |          |           |        |        |        |        | 1.000  | 0.814  | 0.336  | 0.325  | 0.627            | -0.545         | 0.955                |
| MIQ7                 |          |           |        |        |        |        |        | 1.000  | 0.418  | 0.401  | 0.670            | -0.567         | 0.949                |
| MIQ9                 |          |           |        |        |        |        |        |        | 1.000  | 0.819  | 0.354            | -0.369         | 0.394                |
| MIQ10                |          |           |        |        |        |        |        |        |        | 1.000  | 0.319            | -0.316         | 0.380                |
| feeling-as-woman     |          |           |        |        |        |        |        |        |        |        | 1.000            | -0.782         | 0.681                |
| feeling-as-man       |          |           |        |        |        |        |        |        |        |        |                  | 1.000          | -0.583               |
| feeling-both-genders |          |           |        |        |        |        |        |        |        |        |                  |                | 1.000                |

Table SF14: Correlation Matrix of MIQ Variables for Men.

|                      | Same-sex | Other-sex | MIQ1   | MIQ3   | MIQ4   | MIQ5   | MIQ6   | MIQ7   | MIQ9   | MIQ10  | feeling-as-woman | feeling-as-man | feeling-both-genders |
|----------------------|----------|-----------|--------|--------|--------|--------|--------|--------|--------|--------|------------------|----------------|----------------------|
| Same-sex             | 1.000    | -0.022    | -0.105 | -0.104 | 0.107  | 0.012  | 0.058  | 0.032  | 0.064  | -0.004 | -0.022           | -0.007         | 0.047                |
| Other-sex            |          | 1.000     | 0.195  | 0.106  | -0.092 | -0.179 | -0.187 | -0.209 | -0.149 | -0.142 | 0.247            | -0.238         | -0.205               |
| MIQ1                 |          |           | 1.000  | 0.357  | -0.157 | -0.429 | -0.311 | -0.370 | -0.285 | -0.286 | 0.538            | -0.426         | -0.353               |
| MIQ3                 |          |           |        | 1.000  | -0.430 | -0.253 | -0.112 | -0.169 | -0.154 | -0.130 | 0.291            | -0.186         | -0.146               |
| MIQ4                 |          |           |        |        | 1.000  | 0.227  | 0.217  | 0.250  | 0.177  | 0.181  | -0.184           | 0.223          | 0.242                |
| MIQ5                 |          |           |        |        |        | 1.000  | 0.526  | 0.604  | 0.380  | 0.450  | -0.855           | 0.821          | 0.586                |
| MIQ6                 |          |           |        |        |        |        | 1.000  | 0.866  | 0.417  | 0.668  | -0.504           | 0.667          | 0.965                |
| MIQ7                 |          |           |        |        |        |        |        | 1.000  | 0.420  | 0.686  | -0.592           | 0.755          | 0.967                |
| MIQ9                 |          |           |        |        |        |        |        |        | 1.000  | 0.618  | -0.420           | 0.476          | 0.433                |
| MIQ10                |          |           |        |        |        |        |        |        |        | 1.000  | -0.469           | 0.552          | 0.701                |
| feeling-as-woman     |          |           |        |        |        |        |        |        |        |        | 1.000            | -0.774         | -0.568               |
| feeling-as-man       |          |           |        |        |        |        |        |        |        |        |                  | 1.000          | 0.737                |
| feeling-both-genders |          |           |        |        |        |        |        |        |        |        |                  |                | 1.000                |

Table SF15: Correlation Matrix of MIQ Variables for Heterosexual Women.

|                      | Same-sex | Other-sex | MIQ1   | MIQ3   | MIQ4   | MIQ5   | MIQ6   | MIQ7   | MIQ9   | MIQ10  | feeling-as-woman | feeling-as-man | feeling-both-genders |
|----------------------|----------|-----------|--------|--------|--------|--------|--------|--------|--------|--------|------------------|----------------|----------------------|
| Same-sex             | 1.000    | 0.088     | -0.275 | 0.057  | -0.168 | -0.137 | 0.175  | 0.152  | 0.227  | 0.200  | 0.177            | -0.176         | 0.173                |
| Other-sex            |          | 1.000     | 0.209  | -0.034 | 0.242  | 0.187  | -0.083 | -0.117 | -0.076 | -0.057 | -0.170           | 0.283          | -0.104               |
| MIQ1                 |          |           | 1.000  | -0.170 | 0.537  | 0.233  | -0.146 | -0.192 | -0.299 | -0.227 | -0.296           | 0.408          | -0.176               |
| MIQ3                 |          |           |        | 1.000  | -0.282 | -0.315 | 0.346  | 0.358  | 0.266  | 0.215  | 0.279            | -0.310         | 0.369                |
| MIQ4                 |          |           |        |        | 1.000  | 0.290  | -0.231 | -0.183 | -0.209 | -0.124 | -0.258           | 0.435          | -0.219               |
| MIQ5                 |          |           |        |        |        | 1.000  | -0.410 | -0.420 | -0.359 | -0.311 | -0.773           | 0.762          | -0.435               |
| MIQ6                 |          |           |        |        |        |        | 1.000  | 0.814  | 0.358  | 0.298  | 0.574            | -0.419         | 0.959                |
| MIQ7                 |          |           |        |        |        |        |        | 1.000  | 0.427  | 0.340  | 0.638            | -0.436         | 0.945                |
| MIQ9                 |          |           |        |        |        |        |        |        | 1.000  | 0.710  | 0.405            | -0.408         | 0.410                |
| MIQ10                |          |           |        |        |        |        |        |        |        | 1.000  | 0.374            | -0.339         | 0.333                |
| feeling-as-woman     |          |           |        |        |        |        |        |        |        |        | 1.000            | -0.670         | 0.634                |
| feeling-as-man       |          |           |        |        |        |        |        |        |        |        |                  | 1.000          | -0.448               |
| feeling-both-genders |          |           |        |        |        |        |        |        |        |        |                  |                | 1.000                |

Table SF16: Correlation Matrix of MIQ Variables for Heterosexual Men.

|                      | Same-sex | Other-sex | MIQ1   | MIQ3   | MIQ4   | MIQ5   | MIQ6   | MIQ7   | MIQ9   | MIQ10  | feeling-as-woman | feeling-as-man | feeling-both-genders |
|----------------------|----------|-----------|--------|--------|--------|--------|--------|--------|--------|--------|------------------|----------------|----------------------|
| Same-sex             | 1.000    | 0.318     | -0.068 | -0.311 | 0.375  | -0.133 | -0.076 | -0.034 | 0.174  | 0.090  | -0.037           | 0.218          | -0.055               |
| Other-sex            |          | 1.000     | -0.096 | 0.042  | -0.163 | -0.607 | -0.619 | -0.549 | -0.286 | -0.524 | 0.609            | -0.348         | -0.587               |
| MIQ1                 |          |           | 1.000  | 0.509  | -0.040 | 0.052  | -0.067 | -0.144 | -0.388 | -0.270 | 0.275            | 0.205          | -0.107               |
| MIQ3                 |          |           |        | 1.000  | -0.624 | -0.177 | -0.260 | -0.279 | 0.084  | 0.142  | 0.272            | -0.318         | -0.271               |
| MIQ4                 |          |           |        |        | 1.000  | 0.326  | 0.324  | 0.345  | -0.089 | 0.013  | -0.367           | 0.467          | 0.336                |
| MIQ5                 |          |           |        |        |        | 1.000  | 0.931  | 0.943  | 0.153  | 0.051  | -0.890           | 0.866          | 0.943                |
| MIQ6                 |          |           |        |        |        |        | 1.000  | 0.978  | 0.193  | 0.179  | -0.871           | 0.805          | 0.994                |
| MIQ7                 |          |           |        |        |        |        |        | 1.000  | 0.298  | 0.187  | -0.919           | 0.808          | 0.995                |
| MIQ9                 |          |           |        |        |        |        |        |        | 1.000  | 0.834  | -0.492           | -0.014         | 0.247                |
| MIQ10                |          |           |        |        |        |        |        |        |        | 1.000  | -0.390           | -0.158         | 0.184                |
| feeling-as-woman     |          |           |        |        |        |        |        |        |        |        | 1.000            | -0.702         | -0.900               |
| feeling-as-man       |          |           |        |        |        |        |        |        |        |        |                  | 1.000          | 0.811                |
| feeling-both-genders |          |           |        |        |        |        |        |        |        |        |                  |                | 1.000                |

Table SF17: Correlation Matrix of MIQ Variables for Asexual Women.

|                         | Same-sex | Other-sex | MIQ1   | MIQ3   | MIQ4   | MIQ5   | MIQ6   | MIQ7   | MIQ9   | MIQ10  | feeling-as-woman | feeling-as-man | feeling-both-genders |
|-------------------------|----------|-----------|--------|--------|--------|--------|--------|--------|--------|--------|------------------|----------------|----------------------|
| Same-sex                | 1.000    | 0.738     | 0.050  | 0.390  | -0.307 | 0.469  | -0.357 | -0.348 | 0.607  | 0.616  | -0.550           | 0.557          | -0.359               |
| Other-sex               |          | 1.000     | -0.285 | 0.363  | -0.346 | 0.514  | -0.245 | -0.330 | 0.133  | 0.148  | -0.051           | 0.525          | -0.300               |
| MIQ1                    |          |           | 1.000  | -0.743 | 0.607  | 0.166  | -0.087 | 0.016  | 0.054  | 0.146  | -0.515           | 0.211          | -0.028               |
| MIQ3                    |          |           |        | 1.000  | -0.926 | -0.235 | 0.253  | 0.114  | 0.286  | 0.331  | 0.037            | -0.173         | 0.175                |
| MIQ4                    |          |           |        |        | 1.000  | 0.413  | -0.555 | -0.386 | -0.140 | -0.325 | -0.126           | 0.330          | -0.466               |
| MIQ5                    |          |           |        |        |        | 1.000  | -0.836 | -0.917 | -0.054 | -0.259 | -0.491           | 0.982          | -0.902               |
| MIQ6                    |          |           |        |        |        |        | 1.000  | 0.916  | -0.196 | 0.126  | 0.423            | -0.778         | 0.971                |
| MIQ7                    |          |           |        |        |        |        |        | 1.000  | 0.030  | 0.313  | 0.432            | -0.881         | 0.985                |
| MIQ9                    |          |           |        |        |        |        |        |        | 1.000  | 0.920  | -0.314           | -0.001         | -0.066               |
| MIQ10                   |          |           |        |        |        |        |        |        |        | 1.000  | -0.270           | -0.164         | 0.240                |
| feeling-as-a-woman      |          |           |        |        |        |        |        |        |        |        | 1.000            | -0.573         | 0.438                |
| feeling-as-a-man        |          |           |        |        |        |        |        |        |        |        |                  | 1.000          | -0.856               |
| feeling-as-both-genders |          |           |        |        |        |        |        |        |        |        |                  |                | 1.000                |

Table SF18: Correlation Matrix of MIQ Variables for Asexual Men.

|                      | Same-sex | Other-sex | MIQ1  | MIQ3   | MIQ4   | MIQ5   | MIQ6   | MIQ7   | MIQ9   | MIQ10  | feeling-as-woman | feeling-as-man | feeling-both-genders |
|----------------------|----------|-----------|-------|--------|--------|--------|--------|--------|--------|--------|------------------|----------------|----------------------|
| Same-sex             | 1.000    | -0.175    | 0.442 | -0.191 | 0.261  | -0.115 | -0.054 | 0.009  | 0.193  | 0.476  | 0.222            | -0.193         | -0.020               |
| Other-sex            |          | 1.000     | 0.016 | -0.097 | 0.241  | 0.071  | 0.090  | 0.090  | -0.122 | -0.388 | 0.062            | 0.051          | 0.096                |
| MIQ1                 |          |           | 1.000 | 0.027  | 0.317  | -0.437 | -0.468 | -0.399 | -0.147 | -0.062 | 0.707            | -0.462         | -0.455               |
| MIQ3                 |          |           |       | 1.000  | -0.711 | -0.064 | 0.052  | 0.024  | 0.359  | 0.126  | 0.183            | 0.018          | 0.039                |
| MIQ4                 |          |           |       |        | 1.000  | 0.077  | -0.118 | -0.047 | -0.484 | -0.263 | 0.103            | 0.020          | -0.083               |
| MIQ5                 |          |           |       |        |        | 1.000  | 0.779  | 0.661  | 0.352  | 0.319  | -0.862           | 0.962          | 0.756                |
| MIQ6                 |          |           |       |        |        |        | 1.000  | 0.778  | 0.681  | 0.540  | -0.626           | 0.767          | 0.929                |
| MIQ7                 |          |           |       |        |        |        |        | 1.000  | 0.372  | 0.213  | -0.544           | 0.743          | 0.956                |
| MIQ9                 |          |           |       |        |        |        |        |        | 1.000  | 0.810  | -0.252           | 0.350          | 0.539                |
| MIQ10                |          |           |       |        |        |        |        |        |        | 1.000  | -0.240           | 0.205          | 0.379                |
| feeling-as-woman     |          |           |       |        |        |        |        |        |        |        | 1.000            | -0.836         | -0.615               |
| feeling-as-man       |          |           |       |        |        |        |        |        |        |        |                  | 1.000          | 0.799                |
| feeling-both-genders |          |           |       |        |        |        |        |        |        |        |                  |                | 1.000                |

Table SF19: Correlation Matrix of MIQ Variables for Pansexual Women.

|                      | Same-sex | Other-sex | MIQ1   | MIQ3   | MIQ4   | MIQ5   | MIQ6   | MIQ7   | MIQ9   | MIQ10  | feeling-as-woman | feeling-as-man | feeling-both-genders |
|----------------------|----------|-----------|--------|--------|--------|--------|--------|--------|--------|--------|------------------|----------------|----------------------|
| Same-sex             | 1.000    | -0.227    | -0.093 | 0.014  | -0.122 | 0.421  | -0.138 | -0.216 | -0.261 | -0.021 | -0.424           | 0.387          | -0.180               |
| Other-sex            |          | 1.000     | -0.030 | -0.243 | 0.207  | 0.229  | 0.042  | 0.056  | -0.005 | -0.128 | -0.205           | 0.250          | 0.050                |
| MIQ1                 |          |           | 1.000  | -0.467 | 0.656  | 0.465  | -0.075 | -0.120 | -0.097 | -0.015 | -0.410           | 0.254          | -0.099               |
| MIQ3                 |          |           |        | 1.000  | -0.361 | -0.290 | 0.206  | 0.260  | 0.445  | 0.371  | 0.269            | -0.318         | 0.236                |
| MIQ4                 |          |           |        |        | 1.000  | 0.463  | -0.195 | -0.106 | -0.166 | -0.107 | -0.420           | 0.302          | -0.150               |
| MIQ5                 |          |           |        |        |        | 1.000  | -0.468 | -0.553 | -0.141 | -0.099 | -0.988           | 0.933          | -0.516               |
| MIQ6                 |          |           |        |        |        |        | 1.000  | 0.971  | 0.233  | 0.304  | 0.511            | -0.610         | 0.992                |
| MIQ7                 |          |           |        |        |        |        |        | 1.000  | 0.253  | 0.321  | 0.591            | -0.681         | 0.993                |
| MIQ9                 |          |           |        |        |        |        |        |        | 1.000  | 0.818  | 0.137            | -0.181         | 0.245                |
| MIQ10                |          |           |        |        |        |        |        |        |        | 1.000  | 0.086            | -0.189         | 0.315                |
| feeling-as-woman     |          |           |        |        |        |        |        |        |        |        | 1.000            | -0.947         | 0.557                |
| feeling-as-man       |          |           |        |        |        |        |        |        |        |        |                  | 1.000          | -0.652               |
| feeling-both-genders |          |           |        |        |        |        |        |        |        |        |                  |                | 1.000                |

Table SF20: Correlation Matrix of MIQ Variables for Pansexual Men.

|                      | Same-sex | Other-sex | MIQ1   | MIQ3   | MIQ4   | MIQ5   | MIQ6   | MIQ7   | MIQ9   | MIQ10  | feeling-as-woman | feeling-as-man | feeling-both-genders |
|----------------------|----------|-----------|--------|--------|--------|--------|--------|--------|--------|--------|------------------|----------------|----------------------|
| Same-sex             | 1.000    | -0.429    | -0.200 | -0.169 | -0.008 | 0.313  | 0.123  | 0.068  | 0.247  | 0.315  | -0.269           | 0.208          | 0.096                |
| Other-sex            |          | 1.000     | 0.317  | 0.018  | 0.099  | -0.141 | -0.185 | -0.174 | -0.198 | -0.307 | 0.214            | -0.138         | -0.184               |
| MIQ1                 |          |           | 1.000  | 0.251  | 0.136  | -0.421 | -0.438 | -0.381 | -0.361 | -0.245 | 0.473            | -0.480         | -0.418               |
| MIQ3                 |          |           |        | 1.000  | -0.435 | -0.143 | -0.029 | -0.020 | 0.026  | 0.034  | 0.080            | -0.114         | -0.025               |
| MIQ4                 |          |           |        |        | 1.000  | 0.080  | 0.129  | 0.147  | 0.056  | 0.098  | -0.129           | 0.112          | 0.142                |
| MIQ5                 |          |           |        |        |        | 1.000  | 0.486  | 0.500  | 0.355  | 0.349  | -0.868           | 0.897          | 0.505                |
| MIQ6                 |          |           |        |        |        |        | 1.000  | 0.908  | 0.559  | 0.495  | -0.597           | 0.590          | 0.974                |
| MIQ7                 |          |           |        |        |        |        |        | 1.000  | 0.485  | 0.519  | -0.585           | 0.614          | 0.979                |
| MIQ9                 |          |           |        |        |        |        |        |        | 1.000  | 0.730  | -0.398           | 0.395          | 0.532                |
| MIQ10                |          |           |        |        |        |        |        |        |        | 1.000  | -0.404           | 0.417          | 0.520                |
| feeling-as-woman     |          |           |        |        |        |        |        |        |        |        | 1.000            | -0.837         | -0.605               |
| feeling-as-man       |          |           |        |        |        |        |        |        |        |        |                  | 1.000          | 0.617                |
| feeling-both-genders |          |           |        |        |        |        |        |        |        |        |                  |                | 1.000                |

Table SF21: Correlation Matrix of MIQ Variables for Bisexual Women.

|                      | Same-sex | Other-sex | MIQ1  | MIQ3   | MIQ4   | MIQ5   | MIQ6   | MIQ7   | MIQ9   | MIQ10  | feeling-as-woman | feeling-as-man | feeling-both-genders |
|----------------------|----------|-----------|-------|--------|--------|--------|--------|--------|--------|--------|------------------|----------------|----------------------|
| Same-sex             | 1.000    | -0.140    | 0.158 | -0.016 | 0.132  | 0.078  | -0.028 | 0.029  | 0.246  | 0.304  | -0.021           | 0.045          | -0.001               |
| Other-sex            |          | 1.000     | 0.006 | -0.119 | 0.183  | 0.043  | 0.001  | 0.061  | -0.081 | -0.053 | 0.005            | 0.034          | 0.031                |
| MIQ1                 |          |           | 1.000 | -0.533 | 0.522  | 0.500  | -0.460 | -0.426 | -0.110 | -0.113 | -0.529           | 0.596          | -0.460               |
| MIQ3                 |          |           |       | 1.000  | -0.617 | -0.599 | 0.519  | 0.467  | 0.207  | 0.218  | 0.670            | -0.650         | 0.512                |
| MIQ4                 |          |           |       |        | 1.000  | 0.442  | -0.454 | -0.269 | -0.041 | -0.006 | -0.444           | 0.546          | -0.379               |
| MIQ5                 |          |           |       |        |        | 1.000  | -0.632 | -0.636 | -0.188 | -0.204 | -0.913           | 0.853          | -0.656               |
| MIQ6                 |          |           |       |        |        |        | 1.000  | 0.867  | 0.286  | 0.247  | 0.738            | -0.715         | 0.970                |
| MIQ7                 |          |           |       |        |        |        |        | 1.000  | 0.369  | 0.350  | 0.762            | -0.688         | 0.962                |
| MIQ9                 |          |           |       |        |        |        |        |        | 1.000  | 0.780  | 0.227            | -0.194         | 0.336                |
| MIQ10                |          |           |       |        |        |        |        |        |        | 1.000  | 0.229            | -0.182         | 0.306                |
| feeling-as-woman     |          |           |       |        |        |        |        |        |        |        | 1.000            | -0.883         | 0.776                |
| feeling-as-man       |          |           |       |        |        |        |        |        |        |        |                  | 1.000          | -0.726               |
| feeling-both-genders |          |           |       |        |        |        |        |        |        |        |                  |                | 1.000                |

Table SF22: Correlation Matrix of MIQ Variables for Bisexual Men.

|                      | Same-sex | Other-sex | MIQ1   | MIQ3   | MIQ4   | MIQ5   | MIQ6   | MIQ7   | MIQ9   | MIQ10  | feeling-as-woman | feeling-as-man | feeling-both-genders |
|----------------------|----------|-----------|--------|--------|--------|--------|--------|--------|--------|--------|------------------|----------------|----------------------|
| Same-sex             | 1.000    | -0.202    | -0.115 | -0.117 | 0.218  | 0.193  | 0.117  | 0.198  | 0.120  | 0.222  | -0.277           | 0.282          | 0.168                |
| Other-sex            |          | 1.000     | -0.544 | 0.241  | -0.392 | 0.119  | -0.173 | -0.186 | 0.363  | 0.224  | -0.280           | 0.207          | -0.187               |
| MIQ1                 |          |           | 1.000  | 0.300  | 0.047  | -0.448 | -0.138 | -0.188 | -0.517 | -0.315 | 0.641            | -0.468         | -0.172               |
| MIQ3                 |          |           |        | 1.000  | -0.529 | -0.115 | 0.002  | 0.032  | 0.072  | 0.170  | 0.202            | -0.067         | 0.020                |
| MIQ4                 |          |           |        |        | 1.000  | -0.002 | 0.264  | 0.235  | -0.361 | -0.371 | 0.053            | -0.011         | 0.256                |
| MIQ5                 |          |           |        |        |        | 1.000  | 0.205  | 0.452  | 0.374  | 0.329  | -0.927           | 0.933          | 0.355                |
| MIQ6                 |          |           |        |        |        |        | 1.000  | 0.863  | -0.133 | 0.124  | -0.159           | 0.358          | 0.956                |
| MIQ7                 |          |           |        |        |        |        |        | 1.000  | -0.051 | 0.231  | -0.351           | 0.538          | 0.973                |
| MIQ9                 |          |           |        |        |        |        |        |        | 1.000  | 0.703  | -0.550           | 0.443          | -0.090               |
| MIQ10                |          |           |        |        |        |        |        |        |        | 1.000  | -0.450           | 0.500          | 0.191                |
| feeling-as-woman     |          |           |        |        |        |        |        |        |        |        | 1.000            | -0.921         | -0.276               |
| feeling-as-man       |          |           |        |        |        |        |        |        |        |        |                  | 1.000          | 0.475                |
| feeling-both-genders |          |           |        |        |        |        |        |        |        |        |                  |                | 1.000                |

Table SF23: Correlation Matrix of MIQ Variables for Homosexual Women.

|                      | Same-sex | Other-sex | MIQ1   | MIQ3   | MIQ4   | MIQ5   | MIQ6   | MIQ7   | MIQ9   | MIQ10  | feeling-as-woman | feeling-as-man | feeling-both-genders |
|----------------------|----------|-----------|--------|--------|--------|--------|--------|--------|--------|--------|------------------|----------------|----------------------|
| Same-sex             | 1.000    | -0.290    | 0.356  | -0.342 | 0.531  | 0.241  | -0.483 | -0.318 | -0.062 | -0.092 | -0.353           | 0.381          | -0.436               |
| Other-sex            |          | 1.000     | -0.245 | 0.115  | -0.229 | -0.062 | 0.289  | 0.076  | 0.084  | 0.102  | 0.228            | -0.229         | 0.200                |
| MIQ1                 |          |           | 1.000  | -0.280 | 0.732  | 0.365  | -0.360 | -0.359 | -0.063 | -0.016 | -0.458           | 0.613          | -0.389               |
| MIQ3                 |          |           |        | 1.000  | -0.506 | -0.606 | 0.643  | 0.554  | 0.235  | 0.221  | 0.723            | -0.668         | 0.649                |
| MIQ4                 |          |           |        |        | 1.000  | 0.442  | -0.359 | -0.311 | -0.028 | 0.070  | -0.523           | 0.661          | -0.363               |
| MIQ5                 |          |           |        |        |        | 1.000  | -0.533 | -0.545 | -0.406 | -0.294 | -0.933           | 0.852          | -0.583               |
| MIQ6                 |          |           |        |        |        |        | 1.000  | 0.708  | 0.324  | 0.372  | 0.682            | -0.630         | 0.928                |
| MIQ7                 |          |           |        |        |        |        |        | 1.000  | 0.332  | 0.331  | 0.648            | -0.618         | 0.920                |
| MIQ9                 |          |           |        |        |        |        |        |        | 1.000  | 0.729  | 0.389            | -0.412         | 0.354                |
| MIQ10                |          |           |        |        |        |        |        |        |        | 1.000  | 0.284            | -0.256         | 0.381                |
| feeling-as-woman     |          |           |        |        |        |        |        |        |        |        | 1.000            | -0.925         | 0.720                |
| feeling-as-man       |          |           |        |        |        |        |        |        |        |        |                  | 1.000          | -0.675               |
| feeling-both-genders |          |           |        |        |        |        |        |        |        |        |                  |                | 1.000                |

Table SF24: Correlation Matrix of MIQ Variables for Homosexual Men.

**Cohen’s d:** Jacobson and Joel (2018) stated that the weak relation between sexual orientation and gender identity was also evident in the effect size of the differences between the five sexual orientation groups within each gender. In our study, we show in Table SF25 that for MIQ1, we cannot identify significant differences between men and women across any sexual orientation groups. In contrast, MIQ3 showed significant differences between men and women for hetero-, bi-, homo-, and pansexual orientations. Only the group of individuals identifying with an asexual orientation did not show a significant difference. For MIQ4, we observed significant differences for hetero- and bisexual groups, with large negative Cohen’s d values, indicating that women scored lower than men. Homo-, pan-, and asexual groups did not show significant differences. MIQ5 showed significant differences between men and women across all sexual orientations, all with p-values less than 0.01. For MIQ9, a significant difference was observed only for heterosexual orientation. Other sexual orientation groups did not show significant differences. When considering the variable “feeling-as-a-woman,” significant differences between men and women were identified for all sexual orientations, with large positive Cohen’s d values indicating that women scored higher than men.

| Item                    | Sexual Orientation | Cohen’s <i>d</i> | p-value | $\alpha < 0.01$ |
|-------------------------|--------------------|------------------|---------|-----------------|
| MIQ1                    | Heterosexual       | 0.0374           | 0.6528  | No              |
| MIQ1                    | Bisexual           | 0.1903           | 0.2906  | No              |
| MIQ1                    | Homosexual         | 0.4627           | 0.1435  | No              |
| MIQ1                    | Pansexual          | 0.0592           | 0.9009  | No              |
| MIQ1                    | Asexual            | 0.1879           | 0.7563  | No              |
| MIQ3                    | Heterosexual       | 1.9047           | 0.0000  | <b>Yes</b>      |
| MIQ3                    | Bisexual           | 1.9161           | 0.0000  | <b>Yes</b>      |
| MIQ3                    | Homosexual         | 1.3153           | 0.0001  | <b>Yes</b>      |
| MIQ3                    | Pansexual          | 1.3731           | 0.0090  | <b>Yes</b>      |
| MIQ3                    | Asexual            | 0.6606           | 0.2860  | No              |
| MIQ4                    | Heterosexual       | -1.5706          | 0.0000  | <b>Yes</b>      |
| MIQ4                    | Bisexual           | -1.2535          | 0.0000  | <b>Yes</b>      |
| MIQ4                    | Homosexual         | -0.3888          | 0.2171  | No              |
| MIQ4                    | Pansexual          | -0.8229          | 0.0962  | No              |
| MIQ4                    | Asexual            | -0.3018          | 0.6192  | No              |
| MIQ5                    | Heterosexual       | -4.3811          | 0.0000  | <b>Yes</b>      |
| MIQ5                    | Bisexual           | -2.7649          | 0.0000  | <b>Yes</b>      |
| MIQ5                    | Homosexual         | -3.7797          | 0.0000  | <b>Yes</b>      |
| MIQ5                    | Pansexual          | -3.3205          | 0.0000  | <b>Yes</b>      |
| MIQ5                    | Asexual            | -2.0337          | 0.0049  | <b>Yes</b>      |
| MIQ9                    | Heterosexual       | 0.2793           | 0.0008  | <b>Yes</b>      |
| MIQ9                    | Bisexual           | -0.2145          | 0.2340  | No              |
| MIQ9                    | Homosexual         | -0.0432          | 0.8898  | No              |
| MIQ9                    | Pansexual          | -0.0441          | 0.9261  | No              |
| MIQ9                    | Asexual            | 0.2180           | 0.7189  | No              |
| MIQ10                   | Heterosexual       | 0.0330           | 0.6908  | No              |
| MIQ10                   | Bisexual           | -0.2455          | 0.1736  | No              |
| MIQ10                   | Homosexual         | -0.0546          | 0.8612  | No              |
| MIQ10                   | Pansexual          | -0.8303          | 0.0935  | No              |
| MIQ10                   | Asexual            | 0.2119           | 0.7264  | No              |
| feeling-as-both-genders | Heterosexual       | 0.0350           | 0.6735  | No              |
| feeling-as-both-genders | Bisexual           | -0.1875          | 0.2978  | No              |
| feeling-as-both-genders | Homosexual         | 0.0715           | 0.8189  | No              |
| feeling-as-both-genders | Pansexual          | -0.0078          | 0.9869  | No              |
| feeling-as-both-genders | Asexual            | 0.0846           | 0.8887  | No              |
| feeling-as-a-woman      | Heterosexual       | 5.6013           | 0.0000  | <b>Yes</b>      |
| feeling-as-a-woman      | Bisexual           | 3.6981           | 0.0000  | <b>Yes</b>      |
| feeling-as-a-woman      | Homosexual         | 4.0895           | 0.0000  | <b>Yes</b>      |

| Item               | Sexual Orientation | Cohen's <i>d</i> | p-value | $\alpha < 0.01$ |
|--------------------|--------------------|------------------|---------|-----------------|
| feeling-as-a-woman | Pansexual          | 3.2560           | 0.0000  | <b>Yes</b>      |
| feeling-as-a-woman | Asexual            | 2.5844           | 0.0009  | <b>Yes</b>      |
| feeling-as-a-man   | Heterosexual       | 0.0341           | 0.6814  | No              |
| feeling-as-a-man   | Bisexual           | 0.2981           | 0.0990  | No              |
| feeling-as-a-man   | Homosexual         | 0.0472           | 0.8797  | No              |
| feeling-as-a-man   | Pansexual          | -0.3777          | 0.4309  | No              |
| feeling-as-a-man   | Asexual            | -0.3333          | 0.5836  | No              |

Table SF25: Effect Sizes (Cohen's *d*) and *p*-Values for Men and Women by Sexual Orientation.

- The items “wish-to-be-a-woman/man” of Jacobson and Joel (2018): In the past 12 months, have you had the wish or desire to be a man/woman?, were not included in our analysis.
- The items “dislike-my-body-to-its-form” of Jacobson and Joel (2018): In the past 12 months, have you disliked your body because of its male/female form?, was represented by MIQ9a and MIQ9b in our study and merged to MIQ9. When inspecting the group of men, we first selected the gender and then the entries in MIQ9.
- The item “wish-to-have-the-body-of-the-other-sex” of Jacobson and Joel (2018): In the past 12 months, have you wished you had the body of the other sex?, was represented by MIQ10a and MIQ10b in our study and merged to MIQ10. When inspecting the group of men, we first selected the gender and then the entries in MIQ10.

**Method:** Jacobson and Joel (2018) did not conduct EFA or CFA. However, we conducted EFA to explore the underlying structure of the MIQ and SOQ items. First, we computed the KMO Measure of Sampling Adequacy resulting in 0.677.

**Number of Factors:** To determine the optimal number of factors, we computed the following factor retention methods (a) EKC and (b) PA. Both methods suggest that the optimal number of factors is two for MIQ, resulting in a cumulative variance explained of 0.52. Factor 1 has an eigenvalue (variance explained) of 2.35 (0.29) and Factor 2 of 1.79 (0.22). Table SF26 shows that the loadings of MIQ1 and MIQ3 are negative in both factors, indicating that they are not related to the remaining MIQ items. MIQ6–7 and MIQ9–10 load onto Factor 1, which refers to feeling as a man and a woman and wishing to have the body of the other sex. MIQ4–5 load onto Factor 2, which refers to the desire to be and dress like a man.

| Item  | F1     | F2     |
|-------|--------|--------|
| MIQ1  | -0.348 | 0.041  |
| MIQ3  | 0.055  | -0.807 |
| MIQ4  | 0.017  | 0.762  |
| MIQ5  | 0.055  | 0.737  |
| MIQ6  | 0.717  | -0.063 |
| MIQ7  | 0.783  | -0.054 |
| MIQ9  | 0.747  | 0.034  |
| MIQ10 | 0.734  | 0.095  |

Table SF26: Factor Loadings for  $n = 2$  Factors (Oblimin Rotation) of MIQ Variables.

We repeated the factor retention methods (a) EKC and (b) PA for the SOQ items. The EKC suggests that the optimal number of factors is four and PA three, resulting in a cumulative variance explained of

0.69 for three factors. Factor 1 has an eigenvalue (variance explained) of 4.52 (0.30), Factor 2 of 3.49 (0.23) and Factor 3 of 2.35 (0.16). Table SF27 shows that the loadings of SOQ1a–3a, relating to sexual relationship with men, load onto one factor. Items relating to relationships with women and non-cisgender individuals converge onto one factor, such as SOQ1b–e and SOQ2b–e load onto one factor and SOQ3b–e load onto another factor.

| Item  | F1     | F2     | F3     |
|-------|--------|--------|--------|
| SOQ1a | 0.338  | 0.805  | -0.083 |
| SOQ1b | 0.764  | 0.105  | 0.098  |
| SOQ1c | 0.447  | -0.708 | -0.090 |
| SOQ1d | 0.775  | -0.007 | 0.107  |
| SOQ1e | 0.634  | 0.006  | 0.274  |
| SOQ2a | -0.003 | 0.819  | 0.183  |
| SOQ2b | 0.110  | 0.140  | 0.754  |
| SOQ2c | 0.063  | -0.759 | 0.280  |
| SOQ2d | 0.096  | -0.093 | 0.827  |
| SOQ2e | 0.039  | -0.040 | 0.895  |
| SOQ3a | 0.433  | 0.762  | -0.105 |
| SOQ3b | 0.869  | 0.085  | 0.026  |
| SOQ3c | 0.574  | -0.678 | -0.151 |
| SOQ3d | 0.864  | 0.002  | 0.038  |
| SOQ3e | 0.755  | -0.002 | 0.190  |

Table SF27: Factor Loadings for  $n = 3$  Factors (Oblimin Rotation) of SOQ Variables.

### Key Findings:

Our findings replicate the previous results that even participants who self-identify in “normative” ways (i.e., female-woman, male-man) may experience themselves also as the “other” gender or wish to be the “other” gender. The study of Jacobson and Joel (2018) shows that variability in gender identity is only weakly related to sexual orientation, shown in the low correlations between the different aspects of gender identity and “same-and-other-sex-attraction”. Also, in our study, the correlations between the different aspects of gender identity and “same-and-other-sex-attraction” for the group of men and women were low (see Tables SF13 – SF24). In line with the study of Jacobson and Joel (2018), many cisgender individuals in our study had quite “queer” feelings, feeling to some degree as the “other” gender and wishing at least sometimes that they had the body of the “other” sex. On the other hand, the percentage of individuals who were completely “binary” in their responses across all aspects of gender identity was 25.50% in the study of Jacobson and Joel (2018) while in our study about 50% of the heterosexuals had completely binary responses, see Tables SF11 and SF12.

### 4.3. Replication Analyses - TCS

Kozee et al. (2012) used additional scales besides the TCS, such as the Meaning in Life Questionnaire, Satisfaction with Life scale, Body Shape Questionnaire, Beck Anxiety Inventory and Beck Depression Inventory II. Kozee et al. (2012) recruited transgender participants and sent an e-mail describing the study to directors of Lesbian/Gay/Bisexual/ Transgender/Questioning organizations and support groups at universities, colleges, and community centers throughout the U.S.

Kozee et al. (2012) stated that they recruited only transgender individuals, and therefore, we did the analyses for this subscale twice, once including all individuals and once the non-binary individuals, since they are the largest group of non-cisgender individuals. Four of the 15 TCS items were designed to be reverse-scored in the study of Kozee et al. (2012). In our study, we do not have the four items of the

TCS that need to be reverse coded (see section 3 for details). Kozee et al. (2012) used a 5-point Likert scale (1= strongly disagree and 5= strongly agree) which is reversed to our study.

**Correlation matrix for men and women:**

Table SF28 shows the correlation coefficients of the composite variables “same-sex”, “other-sex”, and the five TCS variables (TCS1–TCS5) for men. The composite variable “other-sex” shows positive correlations with all TCS items, while “same-sex” shows negative correlations with all TCS items. Among the TCS items, we find strong positive correlations within the group of men, with values mostly above 0.60.

|           | Same-sex | Other-sex | TCS1   | TCS2   | TCS3   | TCS4   | TCS5   |
|-----------|----------|-----------|--------|--------|--------|--------|--------|
| Same-sex  | 1.000    | -0.402    | -0.186 | -0.226 | -0.219 | -0.167 | -0.195 |
| Other-sex |          | 1.000     | 0.285  | 0.349  | 0.276  | 0.277  | 0.340  |
| TCS1      |          |           | 1.000  | 0.716  | 0.568  | 0.629  | 0.739  |
| TCS2      |          |           |        | 1.000  | 0.719  | 0.739  | 0.680  |
| TCS3      |          |           |        |        | 1.000  | 0.644  | 0.601  |
| TCS4      |          |           |        |        |        | 1.000  | 0.767  |
| TCS5      |          |           |        |        |        |        | 1.000  |

Table SF28: Correlation Matrix of TCS Variables for Men.

Table SF29 shows the correlation coefficients of the composite variables “same-sex”, “other-sex”, and the five TCS variables (TCS1–TCS5) for women. The items have lower correlation coefficients compared to Table SF28.

|           | Same-sex | Other-sex | TCS1   | TCS2   | TCS3   | TCS4   | TCS5   |
|-----------|----------|-----------|--------|--------|--------|--------|--------|
| Same-sex  | 1.000    | -0.496    | -0.225 | -0.108 | -0.069 | -0.059 | -0.065 |
| Other-sex |          | 1.000     | 0.259  | 0.214  | 0.252  | 0.211  | 0.208  |
| TCS1      |          |           | 1.000  | 0.518  | 0.422  | 0.500  | 0.434  |
| TCS2      |          |           |        | 1.000  | 0.628  | 0.581  | 0.475  |
| TCS3      |          |           |        |        | 1.000  | 0.664  | 0.564  |
| TCS4      |          |           |        |        |        | 1.000  | 0.720  |
| TCS5      |          |           |        |        |        |        | 1.000  |

Table SF29: Correlation Matrix of TCS Variables for Women.

Table SF30 presents the means and SD for TCS items for the entire sample, providing insights into the average scores and the variability of responses. TCS1, TCS2, and TCS3 have mean scores of 3.07, 3.37, and 3.52, respectively, indicating a trend of increasing average responses but high variability in participant scores, while TCS4 and TCS5 show lower means of 2.42 and 1.81 with more consistent responses, particularly TCS5, which also has the lowest standard deviation of 1.65.

|      | Mean | SD   |
|------|------|------|
| TCS1 | 3.07 | 2.61 |
| TCS2 | 3.37 | 2.67 |
| TCS3 | 3.52 | 2.89 |
| TCS4 | 2.42 | 2.08 |
| TCS5 | 1.81 | 1.65 |

Table SF30: Mean and Standard Deviation of TCS Variables (Entire Sample).

**Kruskal Wallis Test:** The Kruskal-Wallis test results, see Table SF31, reveal significant gender differences for TCS2, TCS3, and TCS5, with respective H statistics and p-values of 3.991 ( $p=0.046$ ), 4.574 ( $p=0.032$ ), and 5.148 ( $p=0.023$ ). In contrast, TCS1 and TCS4 show no significant differences, with H statistics of 3.341 ( $p=0.068$ ) and 2.905 ( $p=0.088$ ).

|      | Kruskal-Wallis H Statistic | -value |
|------|----------------------------|--------|
| TCS1 | 3.341                      | 0.068  |
| TCS2 | 3.991                      | 0.046  |
| TCS3 | 4.574                      | 0.032  |
| TCS4 | 2.905                      | 0.088  |
| TCS5 | 5.148                      | 0.023  |

Table SF31: Kruskal-Wallis H Test for TCS Comparison Between Women and Men.

**Method:** Kozee et al. (2012) conducted EFA and CFA. We, however, conducted EFA to explore the underlying structure of the TCS items, as we do not have the additional scales used by Kozee et al. (2012). We performed several data quality checks prior to conducting the factor analysis. The results indicate that the Bartlett's Test Chi-Square was 4299.70 with a significance level of  $p < 0.001$ . Additionally, the KMO Measure of Sampling Adequacy yielded a value of 0.796. It indicates that the sampling is adequate for conducting factor analysis, as values above 0.60 are considered acceptable. These results support the suitability of the data for factor analysis.

**Number of Factors:** To determine the optimal number of factors, we computed (a) EKC and (b) PA as factor retention methods. Both methods suggest that the optimal number of factors is one, resulting in a cumulative variance explained of 0.62. Factor 1 has an eigenvalue (variance explained) of 3.11 (0.62). Table SF32 shows that the loadings of the items are negative, indicating that they are all strongly influenced by this single factor in the same direction (negatively).

| Item | F1     |
|------|--------|
| TCS1 | -0.777 |
| TCS2 | -0.880 |
| TCS3 | -0.852 |
| TCS4 | -0.758 |
| TCS5 | -0.654 |

Table SF32: Factor Loadings for  $n = 1$  Factors (Oblimin Rotation) of TCS Variables.

Even though the factor retention methods both suggest that one factor is sufficient, we inspected the factor loadings with two and three factors to explore the underlying pattern. When considering two factors, we can see that the five TCS items load strongly on Factor 1 (TCS1-3) and Factor 2 (TCS4-5), resulting in a cumulative variance explained of 0.74. Factor 1 has an eigenvalue (variance explained) of 2.21 (0.44) and Factor 2 has an eigenvalue (variance explained) of 1.49 (0.30).

When considering three factors, as in Table SF34, we can see that the five TCS items load strongly on Factor 1 and 2, and thus Factor 3 is redundant, resulting in a cumulative variance explained of 0.75. Factor 1 has an eigenvalue (variance explained) of 2.21 (0.44), Factor 2 has an eigenvalue (variance explained) of 1.47 (0.29), and Factor 3 has an eigenvalue (variance explained) of 0.08 (0.02). Therefore, two factors are sufficient to capture the main patterns in the data. This suggests that these items share a common underlying construct, which represents the Appearance Congruence factor of Kozee et al. (2012) in Factor 1. Factor 2 also explains a significant proportion of the variance, with high loadings of the

| Item | F1     | F2     |
|------|--------|--------|
| TCS1 | 0.795  | 0.017  |
| TCS2 | 0.998  | -0.055 |
| TCS3 | 0.758  | 0.128  |
| TCS4 | -0.016 | 0.991  |
| TCS5 | 0.070  | 0.700  |

Table SF33: Factor Loadings for  $n = 2$  Factors (Oblimin Rotation) of TCS Variables.

| Item | F1     | F2     | F3     |
|------|--------|--------|--------|
| TCS1 | 0.841  | 0.017  | -0.171 |
| TCS2 | 0.961  | -0.034 | 0.039  |
| TCS3 | 0.755  | -0.112 | 0.148  |
| TCS4 | 0.067  | 0.833  | 0.117  |
| TCS5 | -0.034 | 0.871  | -0.106 |

Table SF34: Factor Loadings for  $n = 3$  Factors (Oblimin Rotation) of TCS Variables.

items TCS4 and TCS5, indicating that these items are related to a different underlying construct, which represents the Gender Identity Appearance factor of Kozee et al. (2012).

**Principal Component Analysis:** Table SF35 shows that Principal Component (PC) 1 has high positive loadings of TCS 1, 2, 3, 4 and 5. PC2 shows that TCS 4 and 5 have positive loadings compared to TCS 1,2 and 3. However, TCS 1, 2 and 3 have negative and low loadings on PC2, indicating a weaker association with this component. The PCA analysis shows that most of the information content of the TCS items can be summarized in one component.

| Item | PC1   | PC2    | PC3    |
|------|-------|--------|--------|
| TCS1 | 0.827 | -0.349 | 0.399  |
| TCS2 | 0.888 | -0.319 | -0.059 |
| TCS3 | 0.873 | -0.235 | -0.327 |
| TCS4 | 0.823 | 0.420  | -0.171 |
| TCS5 | 0.744 | 0.580  | 0.199  |

Table SF35: PCA Component Loadings of TCS Variables.

The study of Kozee et al. (2012) sampled transgender individuals only. To check the robustness of our results, we rechecked the analysis for non-cisgender individuals only, more specifically for non-binary individuals, since they represent the largest group among non-cisgender individuals in our dataset. We used KMO as a data quality check and obtained a value of 0.699. Then we assessed the optimal number of factors using the EKC and PA. Both factor retention methods suggest that one factor is sufficient. Based on the factor retention method results, we checked the factor loadings for one factor. As in Table SF32, for one factor, we have only negative loadings, particularly for TCS1–3, which emphasize strong alignment between gender identity and appearance.

For two factors (oblimin rotation), we identified the same pattern as in Table SF33TCS1–3, which are particularly strong indicators of congruence between satisfaction with gender identity and congruence of external appearance load on Factor 1, and TCS4–5, which are particularly strong for happiness and acceptance of one’s gender identity, load on Factor 2.

| Item | F1     |
|------|--------|
| TCS1 | -0.622 |
| TCS2 | -0.780 |
| TCS3 | -0.772 |
| TCS4 | -0.681 |
| TCS5 | -0.561 |

Table SF36: Factor Loadings for  $n = 1$  Factors (Oblimin Rotation) of TCS Variables for Non-cisgender individuals.

| Item | F1     | F2     |
|------|--------|--------|
| TCS1 | 0.698  | -0.006 |
| TCS2 | 0.986  | -0.039 |
| TCS3 | 0.610  | -0.223 |
| TCS4 | 0.063  | 0.881  |
| TCS5 | -0.061 | 0.859  |

Table SF37: Factor Loadings for  $n = 2$  Factors (Oblimin Rotation) of TCS Variables for Non-cisgender individuals.

### Key Findings:

The paper of Kozee et al. (2012) identified the following two factors: Appearance Congruence and Gender Identity Acceptance. We checked whether these two factors are representative in our study. Based on the EKC and PA, we should have opted for one factor. The data structure itself, however, favored two factors based on oblique rotation, see Table SF33. In Table SF33, the items TCS1–3 load strongly onto Factor 1, and the items TCS4–5 on Factor 2. Factor 1 appears to capture aspects related to the outward and physical representation of gender identity. Items in this factor reflect how individuals perceive the alignment and satisfaction of their external appearance with their internal gender identity. Specifically, TCS1 states “My outward appearance represents my gender identity,” TCS2 states “I am happy with the way my appearance expresses my gender identity,” and TCS3 states “I feel that my mind and body are consistent with one another.” Factor 2 seems to encompass the internal acceptance and satisfaction with one’s gender identity. Items associated with this factor indicate a focus on the emotional and psychological acceptance of one’s gender identity. Specifically, TCS4 states “I am happy that I have the gender identity that I do” and TCS5 states “I have accepted my gender identity.”

We analyzed the data for non-cisgender individuals and determined the same two-factor solution as mentioned above, showing that our results are robust. Given the factor solution, we could keep the factor names of Kozee et al. (2012): Appearance Congruence and Gender Identity Acceptance. These names reflect the primary themes conveyed by the items loading on each factor and provide a clear understanding of what each factor represents in terms of gender identity. Even if we do not use the original 15-items structure of the TCS in this study, our results align with the two factor solution of Kozee et al. (2012).

## 4.4. Replication Analyses - OSRI

The OSRI comprises 22 items measuring masculinity and 22 items measuring femininity. In our study, we did not include all of the OSRI items (see section 3 for details). De Roover and Vermunt (2019), responses ranged between 1 (Strongly disagree) and 5 (Strongly agree). Our Likert-scale range is reverse coded compared to this. In De Roover and Vermunt (2019), 2,767 respondents were included: 1,539 hetero-, 568 bi-, 230 homo-, and 172 asexuals, and 258 who specified their sexuality as ‘other’.

The paper by De Roover and Vermunt (2019) employed Multi-Group Factor Rotation. We conducted EFA to identify the latent variables that explain the patterns of correlations among the observed variables.

|             | OSRI1 | OSRI2 | OSRI3 | OSRI4 | OSRI5 | OSRI6 | OSRI7 | OSRI8 | OSRI9 | OSRI10 | OSRI11 | OSRI12 | OSRI13 | OSRI14 | OSRI15 | OSRI16 | OSRI17 | OSRI18 |
|-------------|-------|-------|-------|-------|-------|-------|-------|-------|-------|--------|--------|--------|--------|--------|--------|--------|--------|--------|
| Female      | 7.65  | 4.32  | 4.58  | 4.51  | 7.76  | 7.04  | 4.68  | 7.78  | 5.48  | 8.26   | 7.01   | 5.46   | 6.59   | 5.38   | 8.35   | 5.27   | 7.24   | 4.61   |
| Male        | 6.76  | 5.87  | 5.43  | 5.17  | 5.76  | 5.94  | 6.40  | 6.54  | 6.42  | 7.68   | 7.78   | 7.15   | 4.83   | 6.21   | 6.90   | 6.45   | 5.97   | 6.19   |
| Unspecified | 4.89  | 4.33  | 5.56  | 4.22  | 9.00  | 6.33  | 4.22  | 7.67  | 4.89  | 8.89   | 7.33   | 5.56   | 6.22   | 4.56   | 8.22   | 3.89   | 8.11   | 5.00   |

Table SF38: Mean Scores by Sex for the OSRI Variables.

|             | OSRI1 | OSRI2 | OSRI3 | OSRI4 | OSRI5 | OSRI6 | OSRI7 | OSRI8 | OSRI9 | OSRI10 | OSRI11 | OSRI12 | OSRI13 | OSRI14 | OSRI15 | OSRI16 | OSRI17 | OSRI18 |
|-------------|-------|-------|-------|-------|-------|-------|-------|-------|-------|--------|--------|--------|--------|--------|--------|--------|--------|--------|
| Female      | 3.51  | 3.08  | 3.12  | 2.69  | 2.80  | 3.16  | 3.33  | 3.14  | 3.21  | 2.62   | 3.14   | 3.02   | 3.29   | 3.02   | 2.86   | 3.02   | 2.88   | 3.06   |
| Male        | 3.76  | 3.26  | 3.25  | 2.86  | 3.28  | 3.18  | 3.22  | 3.34  | 3.11  | 2.84   | 2.81   | 2.98   | 3.25   | 3.04   | 3.41   | 3.01   | 3.05   | 3.06   |
| Unspecified | 4.23  | 3.81  | 3.17  | 3.11  | 1.58  | 3.16  | 3.60  | 3.43  | 4.20  | 1.76   | 3.50   | 3.56   | 3.87   | 3.17   | 3.49   | 3.48   | 3.06   | 3.00   |

Table SF39: Standard Deviation by Sex for the OSRI Variables.

|             | OSRI1 | OSRI2 | OSRI3 | OSRI4 | OSRI5 | OSRI6 | OSRI7 | OSRI8 | OSRI9 | OSRI10 | OSRI11 | OSRI12 | OSRI13 | OSRI14 | OSRI15 | OSRI16 | OSRI17 | OSRI18 |
|-------------|-------|-------|-------|-------|-------|-------|-------|-------|-------|--------|--------|--------|--------|--------|--------|--------|--------|--------|
| Female      | 10.0  | 3.0   | 4.0   | 4.0   | 9.0   | 8.0   | 4.0   | 10.0  | 5.0   | 10.0   | 8.0    | 5.0    | 8.0    | 5.0    | 10.0   | 5.0    | 8.0    | 4.0    |
| Male        | 9.0   | 6.0   | 5.0   | 5.0   | 6.0   | 6.0   | 7.0   | 7.0   | 7.0   | 9.0    | 9.0    | 8.0    | 4.0    | 7.0    | 9.0    | 7.0    | 6.0    | 6.0    |
| Unspecified | 3.0   | 2.0   | 6.0   | 3.0   | 10.0  | 6.0   | 2.0   | 10.0  | 4.0   | 10.0   | 10.0   | 7.0    | 8.0    | 4.0    | 10.0   | 3.0    | 10.0   | 5.0    |

Table SF40: Median by Sex for the OSRI Variables.

|            | OSRI1 | OSRI2 | OSRI3 | OSRI4 | OSRI5 | OSRI6 | OSRI7 | OSRI8 | OSRI9 | OSRI10 | OSRI11 | OSRI12 | OSRI13 | OSRI14 | OSRI15 | OSRI16 | OSRI17 | OSRI18 |
|------------|-------|-------|-------|-------|-------|-------|-------|-------|-------|--------|--------|--------|--------|--------|--------|--------|--------|--------|
| Man        | 6.56  | 5.81  | 5.68  | 5.21  | 5.63  | 5.90  | 6.35  | 6.26  | 6.69  | 7.66   | 7.93   | 7.14   | 4.68   | 6.10   | 6.80   | 6.66   | 5.88   | 6.40   |
| Non-binary | 6.98  | 4.09  | 3.76  | 4.63  | 7.93  | 6.34  | 5.09  | 7.73  | 4.73  | 8.18   | 6.70   | 5.52   | 5.80   | 5.71   | 7.64   | 5.60   | 7.08   | 4.12   |
| Transman   | 7.36  | 3.49  | 4.42  | 4.22  | 8.17  | 6.27  | 5.21  | 7.68  | 5.45  | 7.43   | 6.37   | 5.71   | 5.87   | 5.39   | 7.84   | 6.10   | 6.92   | 3.99   |
| Transwoman | 7.11  | 6.20  | 3.57  | 4.59  | 6.80  | 5.95  | 6.30  | 8.16  | 5.52  | 7.84   | 6.82   | 6.55   | 5.09   | 6.25   | 8.25   | 5.55   | 6.64   | 4.48   |
| Woman      | 8.26  | 4.76  | 5.16  | 4.53  | 7.51  | 7.65  | 4.42  | 7.90  | 5.84  | 8.49   | 7.36   | 5.53   | 7.32   | 5.29   | 8.86   | 4.76   | 7.39   | 5.12   |

Table SF41: Mean Scores by Gender for the OSRI Variables.

|            | OSRI1 | OSRI2 | OSRI3 | OSRI4 | OSRI5 | OSRI6 | OSRI7 | OSRI8 | OSRI9 | OSRI10 | OSRI11 | OSRI12 | OSRI13 | OSRI14 | OSRI15 | OSRI16 | OSRI17 | OSRI18 |
|------------|-------|-------|-------|-------|-------|-------|-------|-------|-------|--------|--------|--------|--------|--------|--------|--------|--------|--------|
| Man        | 3.82  | 3.33  | 3.24  | 2.82  | 3.29  | 3.19  | 3.25  | 3.37  | 3.04  | 2.87   | 2.75   | 3.01   | 3.17   | 3.03   | 3.47   | 3.00   | 3.09   | 3.08   |
| Non-binary | 3.87  | 2.97  | 2.86  | 2.80  | 2.79  | 3.18  | 3.48  | 3.18  | 3.21  | 2.58   | 3.12   | 2.97   | 3.37   | 3.06   | 3.24   | 3.06   | 2.88   | 2.92   |
| Transman   | 3.48  | 2.51  | 2.90  | 2.55  | 2.31  | 2.99  | 3.24  | 3.08  | 3.03  | 2.93   | 3.10   | 2.75   | 3.17   | 2.92   | 3.21   | 2.93   | 2.86   | 2.78   |
| Transwoman | 3.67  | 3.16  | 2.82  | 2.79  | 2.91  | 3.20  | 2.99  | 2.83  | 2.85  | 2.67   | 2.84   | 3.01   | 3.38   | 3.26   | 2.54   | 2.73   | 3.18   | 3.14   |
| Woman      | 3.08  | 3.19  | 3.20  | 2.71  | 2.92  | 3.02  | 3.26  | 3.07  | 3.22  | 2.53   | 3.15   | 3.14   | 3.12   | 3.03   | 2.41   | 2.92   | 2.84   | 3.04   |

Table SF42: Standard Deviation by Gender for the OSRI Variables.

|            | OSRI1 | OSRI2 | OSRI3 | OSRI4 | OSRI5 | OSRI6 | OSRI7 | OSRI8 | OSRI9 | OSRI10 | OSRI11 | OSRI12 | OSRI13 | OSRI14 | OSRI15 | OSRI16 | OSRI17 | OSRI18 |
|------------|-------|-------|-------|-------|-------|-------|-------|-------|-------|--------|--------|--------|--------|--------|--------|--------|--------|--------|
| Man        | 9     | 6     | 6     | 5     | 6     | 6     | 7     | 7     | 7     | 9      | 9      | 8      | 4      | 6      | 8.5    | 7      | 6      | 7      |
| Non-binary | 10    | 3     | 3     | 4     | 10    | 7     | 4     | 10    | 4     | 10     | 7      | 5      | 6      | 6      | 10     | 6      | 8      | 4      |
| Transman   | 9     | 3     | 4     | 4     | 9.5   | 6     | 5     | 10    | 5     | 9      | 7      | 6      | 6      | 6      | 10     | 6      | 7.5    | 3      |
| Transwoman | 10    | 7     | 3     | 4.5   | 7     | 6     | 6     | 10    | 6     | 9      | 7      | 7      | 4.5    | 6.5    | 10     | 6      | 8      | 4      |
| Woman      | 10    | 4     | 5     | 4     | 9     | 9     | 3     | 10    | 6     | 10     | 9      | 5      | 9      | 5      | 10     | 4      | 8      | 5      |

Table SF43: Median by Gender for the OSRI Variables.

Correlation Matrix

|        | OSRI1 | OSRI2 | OSRI3 | OSRI4 | OSRI5  | OSRI6  | OSRI7  | OSRI8  | OSRI9  | OSRI10 | OSRI11 | OSRI12 | OSRI13 | OSRI14 | OSRI15 | OSRI16 | OSRI17 | OSRI18 |
|--------|-------|-------|-------|-------|--------|--------|--------|--------|--------|--------|--------|--------|--------|--------|--------|--------|--------|--------|
| OSRI1  | 1.000 | 0.094 | 0.052 | 0.000 | 0.055  | 0.276  | 0.024  | 0.192  | 0.114  | 0.166  | 0.126  | 0.030  | 0.278  | 0.020  | 0.448  | -0.010 | 0.167  | 0.040  |
| OSRI2  |       | 1.000 | 0.110 | 0.125 | -0.179 | -0.009 | 0.225  | 0.025  | 0.143  | -0.030 | 0.189  | 0.231  | 0.099  | 0.257  | 0.063  | 0.247  | 0.043  | 0.351  |
| OSRI3  |       |       | 1.000 | 0.234 | -0.110 | 0.125  | 0.060  | -0.001 | 0.274  | 0.100  | 0.224  | 0.135  | 0.030  | -0.009 | 0.051  | -0.063 | 0.048  | 0.176  |
| OSRI4  |       |       |       | 1.000 | -0.043 | 0.038  | 0.077  | 0.008  | 0.148  | 0.082  | 0.204  | 0.228  | -0.044 | 0.137  | -0.009 | 0.095  | 0.046  | 0.210  |
| OSRI5  |       |       |       |       | 1.000  | 0.076  | -0.107 | 0.197  | -0.124 | 0.101  | -0.077 | -0.115 | 0.213  | -0.043 | 0.098  | -0.057 | 0.182  | -0.233 |
| OSRI6  |       |       |       |       |        | 1.000  | 0.071  | 0.241  | 0.129  | 0.366  | 0.101  | 0.137  | 0.287  | -0.004 | 0.287  | 0.023  | 0.233  | 0.060  |
| OSRI7  |       |       |       |       |        |        | 1.000  | -0.016 | 0.171  | 0.008  | 0.125  | 0.248  | -0.031 | 0.222  | -0.019 | 0.285  | 0.034  | 0.216  |
| OSRI8  |       |       |       |       |        |        |        | 1.000  | 0.084  | 0.279  | 0.049  | 0.017  | 0.301  | 0.039  | 0.249  | 0.038  | 0.208  | -0.086 |
| OSRI9  |       |       |       |       |        |        |        |        | 1.000  | 0.182  | 0.280  | 0.142  | 0.090  | 0.060  | 0.104  | 0.056  | 0.120  | 0.172  |
| OSRI10 |       |       |       |       |        |        |        |        |        | 1.000  | 0.189  | 0.052  | 0.215  | 0.038  | 0.286  | 0.029  | 0.232  | 0.003  |
| OSRI11 |       |       |       |       |        |        |        |        |        |        | 1.000  | 0.249  | 0.051  | 0.206  | 0.117  | 0.154  | 0.134  | 0.245  |
| OSRI12 |       |       |       |       |        |        |        |        |        |        |        | 1.000  | 0.005  | 0.241  | 0.013  | 0.261  | -0.019 | 0.315  |
| OSRI13 |       |       |       |       |        |        |        |        |        |        |        |        | 1.000  | 0.055  | 0.381  | 0.010  | 0.264  | 0.047  |
| OSRI14 |       |       |       |       |        |        |        |        |        |        |        |        |        | 1.000  | 0.013  | 0.257  | 0.013  | 0.316  |
| OSRI15 |       |       |       |       |        |        |        |        |        |        |        |        |        |        | 1.000  | -0.014 | 0.270  | 0.034  |
| OSRI16 |       |       |       |       |        |        |        |        |        |        |        |        |        |        |        | 1.000  | 0.036  | 0.249  |
| OSRI17 |       |       |       |       |        |        |        |        |        |        |        |        |        |        |        |        | 1.000  | 0.028  |
| OSRI18 |       |       |       |       |        |        |        |        |        |        |        |        |        |        |        |        |        | 1.000  |

Table SF44: Correlation Matrix of OSRI Variables for Entire Sample.

Table SF44 shows that the correlation coefficients of the OSRI items over the entire sample are relatively low, with few pairwise comparisons exceeding .30 (OSRI12 vs OSRI18, OSRI15 vs OSRI13, OSRI8 vs OSRI13, and OSRI6 vs OSRI10).

|        | OSRI1 | OSRI2 | OSRI3 | OSRI4  | OSRI5  | OSRI6  | OSRI7 | OSRI8  | OSRI9  | OSRI10 | OSRI11 | OSRI12 | OSRI13 | OSRI14 | OSRI15 | OSRI16 | OSRI17 | OSRI18 |
|--------|-------|-------|-------|--------|--------|--------|-------|--------|--------|--------|--------|--------|--------|--------|--------|--------|--------|--------|
| OSRI1  | 1.000 | 0.169 | 0.108 | -0.004 | -0.016 | 0.262  | 0.096 | 0.165  | 0.235  | 0.194  | 0.158  | 0.030  | 0.228  | -0.016 | 0.484  | 0.042  | 0.151  | 0.078  |
| OSRI2  |       | 1.000 | 0.006 | 0.166  | -0.140 | -0.040 | 0.223 | 0.090  | 0.009  | -0.037 | 0.179  | 0.269  | 0.064  | 0.222  | 0.084  | 0.343  | 0.060  | 0.295  |
| OSRI3  |       |       | 1.000 | 0.204  | -0.101 | 0.193  | 0.129 | 0.010  | 0.289  | 0.139  | 0.212  | 0.076  | 0.070  | -0.021 | 0.071  | -0.049 | 0.140  | 0.105  |
| OSRI4  |       |       |       | 1.000  | 0.042  | 0.041  | 0.101 | -0.040 | 0.084  | 0.104  | 0.222  | 0.276  | -0.040 | 0.264  | 0.047  | 0.257  | 0.083  | 0.236  |
| OSRI5  |       |       |       |        | 1.000  | -0.011 | 0.044 | 0.117  | -0.096 | 0.050  | 0.001  | 0.069  | 0.162  | 0.073  | -0.033 | 0.087  | 0.054  | -0.113 |
| OSRI6  |       |       |       |        |        | 1.000  | 0.101 | 0.194  | 0.175  | 0.369  | 0.167  | 0.120  | 0.274  | 0.064  | 0.322  | 0.034  | 0.261  | 0.077  |
| OSRI7  |       |       |       |        |        |        | 1.000 | 0.015  | 0.117  | 0.014  | 0.128  | 0.245  | 0.117  | 0.199  | 0.073  | 0.238  | 0.080  | 0.209  |
| OSRI8  |       |       |       |        |        |        |       | 1.000  | 0.102  | 0.217  | 0.108  | 0.083  | 0.284  | 0.012  | 0.154  | 0.161  | 0.079  | 0.028  |
| OSRI9  |       |       |       |        |        |        |       |        | 1.000  | 0.249  | 0.246  | 0.002  | 0.104  | -0.049 | 0.162  | -0.026 | 0.214  | 0.020  |
| OSRI10 |       |       |       |        |        |        |       |        |        | 1.000  | 0.262  | 0.057  | 0.205  | 0.090  | 0.247  | 0.034  | 0.215  | 0.099  |
| OSRI11 |       |       |       |        |        |        |       |        |        |        | 1.000  | 0.240  | 0.053  | 0.246  | 0.172  | 0.154  | 0.194  | 0.208  |
| OSRI12 |       |       |       |        |        |        |       |        |        |        |        | 1.000  | 0.099  | 0.382  | 0.103  | 0.308  | 0.009  | 0.293  |
| OSRI13 |       |       |       |        |        |        |       |        |        |        |        |        | 1.000  | 0.104  | 0.359  | 0.034  | 0.226  | 0.134  |
| OSRI14 |       |       |       |        |        |        |       |        |        |        |        |        |        | 1.000  | 0.060  | 0.378  | 0.040  | 0.344  |
| OSRI15 |       |       |       |        |        |        |       |        |        |        |        |        |        |        | 1.000  | 0.018  | 0.241  | 0.140  |
| OSRI16 |       |       |       |        |        |        |       |        |        |        |        |        |        |        |        | 1.000  | 0.013  | 0.363  |
| OSRI17 |       |       |       |        |        |        |       |        |        |        |        |        |        |        |        |        | 1.000  | 0.170  |
| OSRI18 |       |       |       |        |        |        |       |        |        |        |        |        |        |        |        |        |        | 1.000  |

Table SF45: Correlation Matrix of OSRI Variables for Men.

Table SF45 indicates that the correlations of the OSRI items over the sample of men are relatively low, with few pairwise comparisons exceeding .30 (OSRI1 vs OSRI15, OSRI6 vs OSRI15, OSRI6 vs OSRI10, OSRI13 vs OSRI15, OSRI14 vs OSRI16).

|        | OSRI1 | OSRI2 | OSRI3 | OSRI4 | OSRI5  | OSRI6 | OSRI7  | OSRI8  | OSRI9  | OSRI10 | OSRI11 | OSRI12 | OSRI13 | OSRI14 | OSRI15 | OSRI16 | OSRI17 | OSRI18 |
|--------|-------|-------|-------|-------|--------|-------|--------|--------|--------|--------|--------|--------|--------|--------|--------|--------|--------|--------|
| OSRI1  | 1.000 | 0.103 | 0.108 | 0.097 | 0.028  | 0.217 | 0.038  | 0.153  | 0.157  | 0.194  | 0.134  | 0.157  | 0.275  | 0.045  | 0.338  | -0.032 | 0.187  | 0.168  |
| OSRI2  |       | 1.000 | 0.072 | 0.070 | -0.049 | 0.044 | 0.086  | 0.135  | 0.119  | -0.011 | 0.088  | 0.085  | 0.157  | 0.209  | 0.059  | 0.069  | 0.165  | 0.284  |
| OSRI3  |       |       | 1.000 | 0.249 | -0.065 | 0.110 | -0.005 | 0.057  | 0.222  | 0.163  | 0.193  | 0.169  | 0.034  | 0.050  | 0.120  | -0.152 | 0.076  | 0.136  |
| OSRI4  |       |       |       | 1.000 | 0.033  | 0.124 | 0.082  | 0.068  | 0.216  | 0.130  | 0.193  | 0.170  | 0.014  | 0.122  | 0.085  | -0.013 | 0.174  | 0.189  |
| OSRI5  |       |       |       |       | 1.000  | 0.056 | -0.118 | 0.133  | -0.016 | 0.005  | 0.042  | -0.029 | 0.174  | -0.004 | 0.0780 | -0.022 | 0.085  | -0.099 |
| OSRI6  |       |       |       |       |        | 1.000 | 0.098  | 0.281  | 0.216  | 0.436  | 0.099  | 0.273  | 0.272  | -0.015 | 0.239  | 0.074  | 0.122  | 0.125  |
| OSRI7  |       |       |       |       |        |       | 1.000  | -0.001 | 0.103  | 0.034  | 0.090  | 0.126  | 0.001  | 0.211  | -0.031 | 0.173  | 0.071  | 0.080  |
| OSRI8  |       |       |       |       |        |       |        | 1.000  | 0.183  | 0.265  | 0.061  | 0.074  | 0.289  | 0.012  | 0.215  | 0.056  | 0.239  | -0.036 |
| OSRI9  |       |       |       |       |        |       |        |        | 1.000  | 0.239  | 0.138  | 0.121  | 0.120  | 0.064  | 0.169  | -0.041 | 0.159  | 0.110  |
| OSRI10 |       |       |       |       |        |       |        |        |        | 1.000  | 0.209  | 0.166  | 0.233  | 0.005  | 0.330  | -0.023 | 0.164  | 0.051  |
| OSRI11 |       |       |       |       |        |       |        |        |        |        | 1.000  | 0.170  | 0.047  | 0.206  | 0.149  | 0.052  | 0.167  | 0.133  |
| OSRI12 |       |       |       |       |        |       |        |        |        |        |        | 1.000  | 0.158  | 0.148  | 0.140  | 0.142  | 0.038  | 0.214  |
| OSRI13 |       |       |       |       |        |       |        |        |        |        |        |        | 1.000  | 0.049  | 0.375  | 0.040  | 0.192  | 0.065  |
| OSRI14 |       |       |       |       |        |       |        |        |        |        |        |        |        | 1.000  | -0.000 | 0.191  | 0.056  | 0.308  |
| OSRI15 |       |       |       |       |        |       |        |        |        |        |        |        |        |        | 1.000  | 0.006  | 0.150  | 0.085  |
| OSRI16 |       |       |       |       |        |       |        |        |        |        |        |        |        |        |        | 1.000  | 0.090  | 0.176  |
| OSRI17 |       |       |       |       |        |       |        |        |        |        |        |        |        |        |        |        | 1.000  | 0.110  |
| OSRI18 |       |       |       |       |        |       |        |        |        |        |        |        |        |        |        |        |        | 1.000  |

Table SF46: Correlation Matrix of OSRI Variables for Women.

Table SF46 states that the correlations for the OSRI items over the sample of women are relatively low, with few pairwise comparisons exceeding .30, even lower compared to the sample of men.

Overall, the Tables SF44, SF45 and SF46 demonstrate that for OSRI1 and OSRI15, the correlation is stronger for men (0.484) than women (0.338), and in the overall sample (0.448). This suggests that for men, the relationship between these items is slightly more pronounced. For OSRI9 and OSRI12, men have a lower correlation (0.003) compared to women (0.121) and the overall sample (0.142). For OSRI14 and OSRI16, the correlation in men is stronger (0.378) than in women (0.191) and the overall sample (0.257). We can see that in the entire sample, the sample of women and of men, the inter-correlations of the OSRI items are not strong, with few inter-correlations exceeding 0.30.

### Exploratory Factor Analysis

We performed several data quality checks prior to conducting the factor analysis. The results indicate that Bartlett’s Test Chi-Square was 3450.572 with a significance level of  $p < 0.001$ . Additionally, the KMO Measure of Sampling Adequacy yielded a value of 0.787, which indicates that the sampling is adequate for conducting factor analysis, as values above 0.60 are considered acceptable. These results support the suitability of the data for factor analysis.

**Number of Factors:** To determine the optimal number of factors, we computed (a) EKC and (b) PA as factor retention methods. While the EKC suggests four factors as sufficient, the PA suggests three. We conducted the factor analysis (oblimin rotation) for four factors, resulting in a cumulative variance explained of 0.28. Factor 1 has an eigenvalue (variance explained) of 1.66 (0.09), Factor 2 has an eigenvalue (variance explained) of 1.39 (0.07), Factor 3 has an eigenvalue (variance explained) of 1.06 (0.06), and Factor 4 has an eigenvalue (variance explained) of 0.86 (0.05).

| Item   | F1     | F2     | F3     | F4     |
|--------|--------|--------|--------|--------|
| OSRI1  | -0.004 | 0.605  | 0.021  | -0.062 |
| OSRI2  | 0.477  | 0.183  | 0.035  | -0.210 |
| OSRI3  | -0.087 | -0.011 | 0.602  | -0.022 |
| OSRI4  | 0.174  | -0.141 | 0.340  | 0.096  |
| OSRI5  | -0.111 | 0.044  | -0.218 | 0.389  |
| OSRI6  | 0.018  | 0.281  | 0.172  | 0.311  |
| OSRI7  | 0.435  | -0.048 | 0.041  | 0.015  |
| OSRI8  | 0.041  | 0.228  | -0.045 | 0.389  |
| OSRI9  | 0.083  | 0.063  | 0.443  | 0.062  |
| OSRI10 | -0.009 | 0.142  | 0.235  | 0.454  |
| OSRI11 | 0.255  | 0.030  | 0.367  | 0.101  |
| OSRI12 | 0.460  | -0.076 | 0.187  | 0.061  |
| OSRI13 | 0.057  | 0.494  | -0.091 | 0.193  |
| OSRI14 | 0.541  | -0.007 | -0.069 | 0.036  |
| OSRI15 | -0.031 | 0.701  | 0.001  | 0.023  |
| OSRI16 | 0.597  | -0.076 | -0.148 | 0.110  |
| OSRI17 | 0.037  | 0.242  | 0.054  | 0.289  |
| OSRI18 | 0.501  | 0.081  | 0.194  | -0.199 |

Table SF47: Factor Loadings for  $n = 4$  Factors (Oblimin Rotation) of OSRI Variables.

Table SF47 suggests that we can determine the following factors:

**Factor 1:** “Creative Expression and Social Interaction”

- OSRI2: I give people handmade gifts.
- OSRI7: When I was a child, I put on fake concerts and plays with my friends.
- OSRI12: I think horoscopes are fun.
- OSRI14: I take lots of pictures of my activities.
- OSRI16: I really like dancing.
- OSRI18: I decorate my things (e.g. stickers on laptop).

**Factor 2:** “Exploratory and Experimental Behavior”

- OSRI1: I have thrown knives, axes or other sharp things.

- OSRI13: I have taken apart machines just to see how they work.
- OSRI15: I have set fuels, aerosols or other chemicals on fire, just for fun.

**Factor 3:** “Private and Personal Preferences”

- OSRI3: I get embarrassed when people read things I have written.
- OSRI4: I am happiest when I am in my bed.
- OSRI9: I get dizzy when I stand up sharply.
- OSRI11: I wear a blanket around the house.

**Factor 4:** “Risk-Taking and Comfort-Seeking”

- OSRI5: I would prefer a class in mathematics to a class in pottery.
- OSRI6: I have thought it would be exciting to be an outlaw.
- OSRI8: I have considered joining the military.
- OSRI10: I think a natural disaster would be kind of exciting.
- OSRI17: I take stairs two at a time.

We further inspected group-specific differences for sex, following the suggested .40-.30-.20 rule proposed by Howard (2016). Based on EFA using oblimin rotation over the female sample, see Table SF48, OSRI1 and OSRI15, which assess masculinity, load onto Factor 1. OSRI14, OSRI16, and OSRI18, which assess femininity, load onto Factor 2. OSRI6, also assessing masculinity, loads onto Factor 3, while OSRI4, assessing femininity, loads onto Factor 4.

| Item   | F1     | F2     | F3     | F4     |
|--------|--------|--------|--------|--------|
| OSRI1  | 0.400  | 0.018  | 0.099  | 0.100  |
| OSRI2  | 0.134  | 0.364  | -0.029 | -0.003 |
| OSRI3  | 0.001  | -0.036 | -0.015 | 0.539  |
| OSRI4  | -0.054 | 0.142  | 0.030  | 0.507  |
| OSRI5  | 0.208  | -0.087 | 0.006  | -0.065 |
| OSRI6  | -0.004 | -0.003 | 1.000  | -0.006 |
| OSRI7  | -0.022 | 0.334  | 0.115  | -0.055 |
| OSRI8  | 0.365  | -0.008 | 0.131  | 0.061  |
| OSRI9  | 0.120  | 0.079  | 0.075  | 0.347  |
| OSRI10 | 0.248  | -0.063 | 0.280  | 0.244  |
| OSRI11 | 0.092  | 0.228  | 0.023  | 0.246  |
| OSRI12 | 0.108  | 0.260  | 0.177  | 0.103  |
| OSRI13 | 0.752  | 0.023  | -0.009 | -0.098 |
| OSRI14 | -0.021 | 0.618  | -0.090 | 0.018  |
| OSRI15 | 0.575  | -0.055 | -0.018 | 0.126  |
| OSRI16 | 0.021  | 0.379  | 0.083  | -0.292 |
| OSRI17 | 0.334  | 0.138  | -0.029 | 0.131  |
| OSRI18 | 0.007  | 0.486  | 0.084  | 0.143  |

Table SF48: Factor Loadings for  $n = 4$  Factors (Oblimin Rotation) of OSRI Variables for Cisgender Females.

### Factor Loadings Group of Cisgender Females

- Factor 1: OSRI1, OSRI5, OSRI8, OSRI13, OSRI15, OSRI17
- Factor 2: OSRI2, OSRI7, OSRI14, OSRI16, OSRI18
- Factor 3: OSRI6, OSRI10
- Factor 4: OSRI3, OSRI4, OSRI9, OSRI11

Table SF49 shows that Factor 1, which assesses femininity, includes OSRI2, OSRI4, OSRI12, OSRI14, OSRI16, and OSRI18; Factor 2, assessing masculinity, consists of OSRI1, OSRI13, and OSRI15; Factor 3, also assessing femininity, contains OSRI3; and Factor 4, which assesses masculinity, comprises OSRI6, OSRI8, and OSRI10.

### Factor Loadings Group of Cisgender Males

- Factor 1: OSRI2, OSRI4, OSRI7, OSRI12, OSRI14, OSRI16, OSRI18
- Factor 2: OSRI1, OSRI13, OSRI15
- Factor 3: OSRI3, OSRI11
- Factor 4: OSRI5, OSRI6, OSRI8, OSRI10, OSRI17

| Item   | F1     | F2     | F3     | F4     |
|--------|--------|--------|--------|--------|
| OSRI1  | -0.072 | 0.695  | 0.055  | -0.047 |
| OSRI2  | 0.451  | 0.292  | -0.014 | -0.319 |
| OSRI3  | 0.030  | 0.003  | 0.564  | 0.026  |
| OSRI4  | 0.415  | -0.163 | 0.278  | 0.027  |
| OSRI5  | 0.080  | -0.100 | -0.267 | 0.289  |
| OSRI6  | 0.027  | 0.266  | 0.152  | 0.395  |
| OSRI7  | 0.345  | 0.064  | 0.112  | -0.051 |
| OSRI8  | 0.087  | 0.231  | -0.217 | 0.291  |
| OSRI9  | -0.077 | 0.158  | 0.474  | 0.089  |
| OSRI10 | 0.012  | 0.114  | 0.155  | 0.510  |
| OSRI11 | 0.263  | 0.045  | 0.320  | 0.135  |
| OSRI12 | 0.593  | 0.021  | 0.077  | 0.037  |
| OSRI13 | 0.117  | 0.394  | -0.182 | 0.328  |
| OSRI14 | 0.624  | -0.119 | -0.074 | 0.140  |
| OSRI15 | 0.025  | 0.631  | 0.034  | 0.126  |
| OSRI16 | 0.624  | 0.005  | -0.138 | -0.041 |
| OSRI17 | 0.048  | 0.171  | 0.165  | 0.263  |
| OSRI18 | 0.567  | 0.018  | 0.105  | -0.034 |

Table SF49: Factor Loadings for  $n = 4$  Factors (Oblimin Rotation) of OSRI Variables for Cisgender Males.

We conducted PCA to screen the data and the loadings of each item on the respective components. However, we cannot identify a clear pattern, as many items have cross-loadings, see in Table SF50.

Table SF50 displays the loadings of 10 PCs, which are linear combinations of the original variables that are uncorrelated with each other. The loadings indicate the contribution of each original variable (OSRI1 to OSRI18) to each PC. Higher absolute values of the loadings indicate stronger contributions of the variables to those components.

| Item   | PC1    | PC2    | PC3    | PC4    | PC5    | PC6    | PC7    | PC8    | PC9    | PC10   |
|--------|--------|--------|--------|--------|--------|--------|--------|--------|--------|--------|
| OSRI1  | 0.431  | 0.379  | 0.035  | -0.474 | 0.024  | -0.184 | -0.041 | 0.205  | 0.406  | -0.064 |
| OSRI2  | 0.441  | -0.375 | 0.212  | -0.316 | 0.210  | 0.187  | 0.130  | -0.243 | -0.078 | -0.201 |
| OSRI3  | 0.341  | -0.128 | -0.643 | -0.003 | 0.114  | 0.042  | 0.311  | -0.133 | -0.005 | 0.185  |
| OSRI4  | 0.332  | -0.266 | -0.307 | 0.367  | 0.394  | -0.250 | 0.176  | 0.104  | 0.157  | -0.390 |
| OSRI5  | -0.042 | 0.486  | 0.255  | 0.465  | 0.290  | 0.094  | 0.202  | 0.114  | 0.261  | 0.306  |
| OSRI6  | 0.484  | 0.383  | -0.075 | 0.058  | -0.357 | -0.342 | 0.179  | 0.062  | -0.260 | 0.116  |
| OSRI7  | 0.354  | -0.367 | 0.235  | 0.052  | -0.475 | 0.216  | 0.319  | 0.139  | 0.255  | 0.114  |
| OSRI8  | 0.344  | 0.455  | 0.171  | 0.228  | -0.016 | 0.025  | -0.026 | -0.572 | 0.144  | -0.233 |
| OSRI9  | 0.468  | -0.093 | -0.420 | -0.019 | -0.220 | 0.431  | -0.079 | -0.179 | 0.183  | 0.064  |
| OSRI10 | 0.456  | 0.382  | -0.147 | 0.297  | -0.254 | -0.118 | -0.329 | -0.058 | -0.235 | -0.070 |
| OSRI11 | 0.535  | -0.189 | -0.228 | 0.120  | 0.121  | 0.133  | -0.483 | 0.185  | 0.152  | 0.132  |
| OSRI12 | 0.464  | -0.394 | 0.066  | 0.164  | -0.090 | -0.397 | 0.135  | 0.002  | 0.097  | 0.123  |
| OSRI13 | 0.425  | 0.482  | 0.209  | -0.154 | 0.210  | 0.067  | 0.194  | -0.207 | -0.140 | 0.209  |
| OSRI14 | 0.386  | -0.351 | 0.392  | 0.111  | 0.236  | -0.041 | -0.285 | -0.086 | -0.026 | 0.346  |
| OSRI15 | 0.472  | 0.495  | 0.053  | -0.349 | 0.076  | -0.101 | -0.081 | 0.158  | 0.109  | -0.088 |
| OSRI16 | 0.345  | -0.353 | 0.479  | 0.185  | -0.184 | 0.046  | -0.029 | 0.076  | 0.027  | -0.303 |
| OSRI17 | 0.389  | 0.376  | 0.049  | 0.163  | 0.116  | 0.444  | 0.131  | 0.412  | -0.317 | -0.178 |
| OSRI18 | 0.483  | -0.479 | 0.047  | -0.183 | 0.173  | -0.080 | 0.043  | 0.045  | -0.345 | 0.097  |

Table SF50: PCA Component Loadings of OSRI Variables.

For example, PC1 has the highest loadings of OSRI11 (0.535), OSRI15 (0.472), and OSRI18 (0.483), suggesting that these variables share a common underlying pattern captured by this component. PC2 shows significant contributions from OSRI15 (0.495), OSRI13 (0.482), and OSRI5 (0.486). PC3, characterized by strong negative loading from OSRI3 (-0.643) and positive loading from OSRI16 (0.479), suggests another distinct dimension.

**Key Findings:** In our analysis, we did not apply multigroup factor analysis as did De Roover and Vermunt (2019). Instead, we performed EFA for the entire sample using oblique rotation. Following the factor retention methods, our analysis does not support the two-factor solution of masculinity and femininity. Instead, our results support the four factor-solution where masculinity and femininity are further split, which is described above, over the entire sample. In our analysis using oblique rotation for the entire sample, see Table SF47, we have two factors measuring femininity and two factors measuring masculinity. The items in Factor 1 and Factor 3 relate to femininity, while Factor 2 and Factor 4 relate to masculinity.

#### 4.5. Replication Analyses - MSPD

Molero et al. (2013) used a 5-point Likert scale (1= strongly disagree and 5= strongly agree). They elicited the MSPD (20 items scales), plus additional measures: the stigma consciousness scale, the positive and negative affect schedule scale and the self-acceptance scale. Molero et al.'s sample comprises 1,016 participants, 54.1% men and 46.4% women. The participants were members of five stigmatized collectives: Latin American immigrants (N = 199), Romanian immigrants (N = 202), people with HIV (N = 134), gays (N = 237) and lesbians (N = 232).

The MSPD comprises items which measure four aspects of discrimination: blatant group discrimination (BGD), subtle group discrimination (SGD), blatant individual discrimination (BID), and subtle individual discrimination (SID). We included all of the items of the MSPD, except for one "...suffer from discrimination in the legal sphere." Table SF51 shows the grouping of the variables as in the paper of

| Category | Items                                                                                                                                                                                                                                          |
|----------|------------------------------------------------------------------------------------------------------------------------------------------------------------------------------------------------------------------------------------------------|
| BGD      | MSPD1a, MSPD1b, MSPD1c, MSPD1d, MSPD1e, MSPD2a, MSPD2b, MSPD2c, MSPD2d, MSPD2e, MSPD3a, MSPD3b, MSPD3c, MSPD3d, MSPD3e, MSPD4a, MSPD4b, MSPD4c, MSPD4d, MSPD4e, MSPD5a, MSPD5b, MSPD5c, MSPD5d, MSPD5e, MSPD6a, MSPD6b, MSPD6c, MSPD6d, MSPD6e |
| SGD      | MSPD7a, MSPD7b, MSPD7c, MSPD7d, MSPD7e, MSPD8a, MSPD8b, MSPD8c, MSPD8d, MSPD8e, MSPD9a, MSPD9b, MSPD9c, MSPD9d, MSPD9e                                                                                                                         |
| BID      | MSPD10a, MSPD10b, MSPD10c, MSPD10d, MSPD10e, MSPD10f, MSPD10g                                                                                                                                                                                  |
| SID      | MSPD10h, MSPD10i, MSPD10j                                                                                                                                                                                                                      |

Table SF51: Grouping of Items (MSPD).

Table SF52 states the means and SDs of the MSPD items for females and males. Items related to the discrimination of men have a high mean and low SD, suggesting that females have high, but consistent scores for this item (10 equals “strongly disagree” in our study). Males have higher means for items related to discrimination of men, but also higher values for items related to discrimination of women.

| Item   | Female Mean | Female SD | Male Mean | Male SD |
|--------|-------------|-----------|-----------|---------|
| MSPD1a | 7.99        | 2.37      | 6.74      | 2.93    |
| MSPD1b | 5.63        | 2.76      | 6.56      | 2.66    |
| MSPD1c | 2.71        | 2.20      | 3.68      | 2.61    |
| MSPD1d | 3.20        | 2.26      | 3.92      | 2.55    |
| MSPD1e | 3.54        | 2.42      | 4.21      | 2.51    |
| MSPD2a | 7.92        | 2.59      | 6.60      | 2.97    |
| MSPD2b | 3.94        | 2.75      | 5.24      | 2.81    |
| MSPD2c | 2.57        | 2.38      | 3.78      | 2.88    |
| MSPD2d | 2.86        | 2.41      | 3.90      | 2.77    |
| MSPD2e | 3.15        | 2.49      | 4.16      | 2.79    |
| MSPD3a | 8.42        | 2.28      | 7.17      | 2.87    |
| MSPD3b | 3.58        | 2.55      | 4.57      | 2.72    |
| MSPD3c | 2.60        | 2.30      | 3.61      | 2.76    |
| MSPD3d | 2.96        | 2.36      | 3.82      | 2.79    |
| MSPD3e | 3.29        | 2.47      | 4.21      | 2.76    |
| MSPD4a | 8.28        | 2.40      | 7.15      | 2.89    |
| MSPD4b | 3.87        | 2.96      | 5.44      | 3.09    |
| MSPD4c | 2.70        | 2.52      | 3.91      | 3.01    |
| MSPD4d | 2.80        | 2.53      | 3.98      | 2.98    |
| MSPD4e | 3.29        | 2.68      | 4.48      | 2.99    |
| MSPD5a | 7.22        | 2.68      | 5.91      | 3.04    |
| MSPD5b | 5.48        | 2.69      | 6.14      | 2.69    |
| MSPD5c | 3.08        | 2.29      | 3.74      | 2.59    |
| MSPD5d | 3.28        | 2.30      | 3.76      | 2.53    |
| MSPD5e | 3.55        | 2.40      | 4.12      | 2.57    |
| MSPD6a | 8.73        | 1.99      | 7.54      | 2.70    |
| MSPD6b | 4.74        | 2.82      | 5.70      | 2.83    |
| MSPD6c | 3.19        | 2.49      | 4.28      | 2.87    |

| Item    | Female Mean | Female SD | Male Mean | Male SD |
|---------|-------------|-----------|-----------|---------|
| MSPD6d  | 3.41        | 2.52      | 4.43      | 2.86    |
| MSPD6e  | 3.71        | 2.58      | 4.65      | 2.78    |
| MSPD7a  | 6.11        | 3.00      | 5.69      | 3.08    |
| MSPD7b  | 5.66        | 2.70      | 6.22      | 2.65    |
| MSPD7c  | 2.79        | 2.35      | 3.71      | 2.73    |
| MSPD7d  | 3.17        | 2.38      | 3.91      | 2.70    |
| MSPD7e  | 3.47        | 2.48      | 4.20      | 2.64    |
| MSPD8a  | 6.75        | 2.92      | 6.28      | 2.30    |
| MSPD8b  | 5.48        | 2.84      | 5.88      | 2.80    |
| MSPD8c  | 3.52        | 2.69      | 3.74      | 2.63    |
| MSPD8d  | 3.60        | 2.66      | 3.78      | 2.59    |
| MSPD8e  | 3.71        | 2.67      | 3.97      | 2.61    |
| MSPD9a  | 6.46        | 3.25      | 5.86      | 3.13    |
| MSPD9b  | 4.17        | 2.78      | 4.99      | 2.86    |
| MSPD9c  | 2.46        | 2.16      | 3.19      | 2.50    |
| MSPD9d  | 2.60        | 2.18      | 3.26      | 2.43    |
| MSPD9e  | 2.78        | 2.25      | 3.60      | 2.52    |
| MSPD10a | 4.74        | 3.24      | 6.02      | 3.51    |
| MSPD10b | 4.56        | 3.14      | 6.06      | 3.36    |
| MSPD10c | 5.41        | 3.61      | 6.78      | 3.47    |
| MSPD10d | 5.54        | 3.47      | 7.15      | 3.18    |
| MSPD10e | 5.60        | 3.93      | 7.02      | 3.47    |
| MSPD10f | 5.95        | 3.22      | 6.68      | 3.24    |
| MSPD10g | 6.62        | 3.57      | 7.64      | 3.08    |
| MSPD10h | 5.40        | 3.20      | 6.71      | 3.09    |
| MSPD10i | 5.16        | 3.15      | 6.65      | 3.13    |
| MSPD10j | 6.16        | 3.06      | 6.66      | 3.05    |

Table SF52: Mean and SD MSPD (Male and Female).

**Method:** The paper of Molero et al. (2013) conducted CFA, but we did EFA as we do not have the additional scales used by Molero et al. (2013). The same methodology has been applied in the section 4.3.

**Exploratory Factor Analysis:** We performed several data quality checks prior to conducting the factor analysis. The KMO Measure of Sampling Adequacy yielded a value of 0.954, which indicates that the sampling is adequate for conducting factor analysis, as values above 0.60 are considered acceptable. These results support the suitability of the data for factor analysis. The EKC shows that eight and the PA that six factors are optimal.

**Number of Factors:** While the EKC suggests eight factors as sufficient, the PA suggests six. We conducted the factor analysis (oblimin rotation) for six factors, resulting in a cumulative variance explained of 0.56. Factor 1 has an eigenvalue (variance explained) of 10.42 (0.19), Factor 2 has an eigenvalue (variance explained) of 6.51 (0.12), Factor 3 has an eigenvalue (variance explained) of 4.52 (0.08), Factor 4 has an eigenvalue (variance explained) of 4.10 (0.07), Factor 5 has an eigenvalue (variance explained) of 3.77 (0.07) and Factor 6 has an eigenvalue (variance explained) of 1.72 (0.03).

| Item    | F1     | F2     | F3     | F4     | F5     | F6     |
|---------|--------|--------|--------|--------|--------|--------|
| MSPD1a  | -0.062 | 0.043  | 0.715  | -0.015 | -0.030 | 0.127  |
| MSPD1b  | -0.113 | 0.054  | -0.018 | 0.689  | -0.031 | 0.214  |
| MSPD1c  | 0.220  | 0.058  | -0.061 | 0.203  | 0.163  | 0.583  |
| MSPD1d  | 0.250  | 0.018  | 0.003  | 0.108  | 0.160  | 0.582  |
| MSPD1e  | 0.345  | 0.058  | 0.037  | 0.097  | 0.100  | 0.503  |
| MSPD2a  | -0.031 | -0.005 | 0.789  | -0.085 | 0.028  | 0.078  |
| MSPD2b  | 0.049  | 0.032  | -0.077 | 0.774  | -0.007 | 0.137  |
| MSPD2c  | 0.630  | 0.030  | -0.085 | 0.148  | -0.020 | 0.270  |
| MSPD2d  | 0.646  | 0.025  | -0.040 | 0.097  | -0.020 | 0.307  |
| MSPD2e  | 0.695  | 0.043  | -0.019 | 0.051  | -0.022 | 0.254  |
| MSPD3a  | -0.037 | -0.023 | 0.791  | -0.019 | -0.041 | 0.015  |
| MSPD3b  | 0.209  | 0.007  | -0.025 | 0.672  | -0.025 | 0.078  |
| MSPD3c  | 0.719  | -0.016 | -0.067 | 0.123  | 0.031  | 0.136  |
| MSPD3d  | 0.771  | 0.008  | -0.012 | 0.002  | 0.030  | 0.138  |
| MSPD3e  | 0.801  | 0.028  | -0.003 | -0.021 | 0.028  | 0.096  |
| MSPD4a  | 0.050  | -0.032 | 0.758  | 0.010  | -0.056 | -0.024 |
| MSPD4b  | 0.228  | 0.106  | 0.022  | 0.643  | -0.044 | -0.022 |
| MSPD4c  | 0.732  | 0.061  | -0.020 | 0.160  | -0.012 | 0.038  |
| MSPD4d  | 0.765  | 0.058  | -0.003 | 0.118  | -0.016 | 0.050  |
| MSPD4e  | 0.797  | 0.069  | -0.003 | 0.073  | -0.051 | 0.028  |
| MSPD5a  | 0.105  | -0.054 | 0.781  | 0.061  | -0.010 | 0.024  |
| MSPD5b  | 0.074  | 0.084  | 0.137  | 0.657  | -0.051 | 0.004  |
| MSPD5c  | 0.677  | 0.017  | 0.041  | 0.035  | 0.113  | 0.189  |
| MSPD5d  | 0.711  | 0.031  | 0.063  | -0.024 | 0.111  | 0.173  |
| MSPD5e  | 0.779  | 0.031  | 0.083  | -0.039 | 0.067  | 0.115  |
| MSPD6a  | 0.007  | 0.002  | 0.733  | 0.005  | -0.037 | -0.162 |
| MSPD6b  | 0.260  | 0.042  | 0.048  | 0.677  | -0.019 | -0.241 |
| MSPD6c  | 0.855  | 0.030  | -0.056 | 0.111  | 0.047  | -0.217 |
| MSPD6d  | 0.891  | 0.034  | -0.019 | 0.033  | 0.056  | -0.214 |
| MSPD6e  | 0.888  | 0.055  | 0.004  | 0.014  | 0.042  | -0.225 |
| MSPD7a  | 0.070  | 0.116  | 0.573  | 0.047  | 0.014  | -0.002 |
| MSPD7b  | -0.064 | 0.002  | 0.058  | 0.628  | 0.126  | -0.036 |
| MSPD7c  | 0.450  | 0.038  | -0.050 | 0.116  | 0.317  | 0.139  |
| MSPD7d  | 0.507  | -0.002 | 0.008  | 0.067  | 0.309  | 0.127  |
| MSPD7e  | 0.521  | 0.018  | 0.012  | 0.044  | 0.291  | 0.090  |
| MSPD8a  | -0.068 | 0.104  | 0.565  | 0.130  | 0.132  | -0.030 |
| MSPD8b  | -0.202 | 0.083  | 0.112  | 0.571  | 0.422  | -0.089 |
| MSPD8c  | -0.034 | 0.022  | -0.030 | 0.037  | 0.905  | 0.003  |
| MSPD8d  | 0.004  | 0.001  | 0.006  | 0.009  | 0.917  | -0.003 |
| MSPD8e  | 0.061  | 0.006  | 0.008  | 0.012  | 0.854  | -0.006 |
| MSPD9a  | -0.030 | 0.092  | 0.540  | 0.060  | 0.093  | -0.066 |
| MSPD9b  | 0.007  | 0.111  | 0.040  | 0.548  | 0.218  | -0.035 |
| MSPD9c  | 0.367  | 0.045  | -0.059 | 0.002  | 0.499  | 0.108  |
| MSPD9d  | 0.400  | 0.054  | -0.020 | -0.057 | 0.496  | 0.103  |
| MSPD9e  | 0.446  | 0.082  | -0.025 | -0.063 | 0.433  | 0.097  |
| MSPD10a | 0.018  | 0.822  | 0.037  | 0.005  | 0.020  | 0.029  |

|         |        |       |        |        |        |        |
|---------|--------|-------|--------|--------|--------|--------|
| MSPD10b | -0.018 | 0.853 | 0.011  | -0.009 | 0.033  | 0.013  |
| MSPD10c | -0.022 | 0.797 | -0.020 | -0.043 | -0.012 | -0.024 |
| MSPD10d | -0.004 | 0.819 | -0.059 | 0.034  | -0.081 | -0.034 |
| MSPD10e | 0.020  | 0.714 | -0.018 | -0.001 | -0.044 | -0.036 |
| MSPD10f | -0.006 | 0.873 | 0.060  | -0.072 | -0.019 | 0.037  |
| MSPD10g | -0.002 | 0.749 | -0.028 | 0.005  | -0.126 | -0.060 |
| MSPD10h | 0.017  | 0.788 | -0.002 | 0.031  | 0.053  | -0.014 |
| MSPD10i | 0.012  | 0.818 | -0.024 | 0.032  | 0.042  | 0.016  |
| MSPD10j | -0.039 | 0.742 | 0.041  | 0.018  | 0.055  | 0.024  |

Table SF53: Factor Loadings for  $n = 6$  Factors (Oblimin Rotation) of MSPD Variables.

Table SF53 shows the EFA results for the MSPD items comprising six factors as suggested by the PA. In our study, the BID and SID factors were combined into a single factor. The BGD and SGD items are organized into the following factors: one factor for items measuring subtle and group discrimination against men, another for items measuring subtle and group discrimination against women, two factors for items measuring subtle group discrimination against non-cisgender individuals, and one factor for blatant and subtle group discrimination against non-cisgender individuals, see Table SF54 .

| Factor | Items                                                                                                                                           |
|--------|-------------------------------------------------------------------------------------------------------------------------------------------------|
| 1      | MSPD2c, MSPD2d, MSPD2e, MSPD3c, MSPD3d, MSPD3e, MSPDP4c, MSPD4d, MSPD4e, MSPD5c, MSPD5d, MSPD5e, MSPD6c, MSPD6d, MSPD6e, MSPD7c, MSPD7d, MSPD7e |
| 2      | MSPD10a, MSPD10b, MSPD10c, MSPD10d, MSPD10e, MSPD10f, MSPD10g, MSPD10h, MSPD10i, MSPD10j                                                        |
| 3      | MSPD1a, MSPD2a, MSPD3a, MSPD4a, MSPD5a, MSPD6a, MSPD7a, MSPD8a, MSPD9a                                                                          |
| 4      | MSPD1b, MSPD2b, MSPD3b, MSPD4b, MSPD5b, MSPD6b, MSPD7b, MSPD8b, MSPD9b                                                                          |
| 5      | MSPD8c, MSPD8d, MSPD8e, MSPD9c, MSPD9d, MSPD9e                                                                                                  |
| 6      | MSPD1c, MSPD1d, MSPD1e                                                                                                                          |

Table SF54: Factor Structure of MSPD items (Entire Sample).

**Key Findings:** We conducted thorough data quality checks that affirmed the adequacy of factor analysis for the MSPD items. In contrast to Molero et al. (2013), our EFA results show that the constructs of BID, SID, BGD and SGD are not distinct factors. Instead, in our study, BID and SID converge into a single factor, and items of BGD and SGD load on the same factor but differentiate based on gender identity.

## 4.6. Summary and Expectation Items Analyses

In this section, we analyze the supplementary summary and expectation items of each subscale.

|         | MIQ11  | MIQ12  | MIQ13   | TCS6    | TCS7    | TCS8    | OSRI19  | OSRI20  | SOQ4a   | SOQ4b   | SOQ4c   | SOQ4d   | SOQ4e   | SOQ5a   | SOQ5b   | SOQ5c   | SOQ5d   | SOQ5e   | MSPD10k | MSPD10l |
|---------|--------|--------|---------|---------|---------|---------|---------|---------|---------|---------|---------|---------|---------|---------|---------|---------|---------|---------|---------|---------|
| MIQ11   | 1.0000 | 0.0391 | 0.0253  | 0.5140  | 0.0560  | 0.0279  | 0.0417  | 0.3557  | 0.0258  | -0.0377 | -0.1479 | -0.1275 | -0.1681 | -0.0497 | -0.0231 | -0.3004 | -0.2572 | -0.2941 | -0.2464 | -0.2333 |
| MIQ12   |        | 1.0000 | -0.6968 | -0.0972 | 0.7738  | -0.7651 | -0.0999 | -0.0614 | -0.3847 | 0.3750  | -0.0184 | -0.0473 | -0.0066 | -0.4294 | 0.4752  | 0.0220  | -0.0160 | 0.0222  | 0.1348  | 0.1255  |
| MIQ13   |        |        | 1.0000  | -0.0120 | -0.7544 | 0.7623  | 0.0739  | -0.0634 | 0.3866  | -0.3869 | 0.0551  | 0.0758  | 0.0796  | 0.4986  | -0.4671 | 0.1158  | 0.1245  | 0.1127  | -0.0445 | -0.0546 |
| TCS6    |        |        |         | 1.0000  | 0.0442  | 0.1302  | 0.1135  | 0.5864  | -0.0476 | -0.0620 | -0.2550 | -0.2358 | -0.3221 | -0.0838 | -0.0416 | -0.4732 | -0.4014 | -0.4807 | -0.3010 | -0.2587 |
| TCS7    |        |        |         |         | 1.0000  | -0.7001 | -0.0119 | 0.1195  | -0.4084 | 0.4139  | -0.0723 | -0.0838 | -0.0800 | -0.4905 | 0.5222  | -0.1015 | -0.0854 | -0.1064 | 0.0633  | 0.0581  |
| TCS8    |        |        |         |         |         | 1.0000  | 0.1201  | 0.1049  | 0.4122  | -0.3855 | 0.0104  | 0.0405  | -0.0167 | 0.4787  | -0.4609 | -0.0072 | 0.0209  | -0.0326 | -0.1191 | -0.1242 |
| OSRI19  |        |        |         |         |         |         | 1.0000  | 0.1553  | 0.0638  | -0.0797 | -0.0573 | -0.0507 | -0.0647 | 0.0785  | -0.0445 | -0.0719 | -0.0414 | -0.0754 | 0.0006  | 0.0041  |
| OSRI20  |        |        |         |         |         |         |         | 1.0000  | 0.0312  | -0.0036 | -0.2053 | -0.1865 | -0.3006 | -0.0698 | -0.0320 | -0.4632 | -0.4310 | -0.5209 | -0.3015 | -0.2894 |
| SOQ4a   |        |        |         |         |         |         |         |         | 1.0000  | -0.2035 | 0.5173  | 0.4441  | 0.4162  | 0.5803  | -0.4721 | 0.1208  | -0.0285 | 0.0257  | -0.0547 | -0.0423 |
| SOQ4b   |        |        |         |         |         |         |         |         |         | 1.0000  | 0.3877  | 0.4589  | 0.3083  | -0.4596 | 0.6277  | 0.0012  | 0.1689  | 0.0231  | 0.0622  | 0.0548  |
| SOQ4c   |        |        |         |         |         |         |         |         |         |         | 1.0000  | 0.8513  | 0.8071  | 0.1110  | 0.0601  | 0.3643  | 0.2731  | 0.2699  | 0.1310  | 0.1279  |
| SOQ4d   |        |        |         |         |         |         |         |         |         |         |         | 1.0000  | 0.8046  | 0.0646  | 0.1205  | 0.2811  | 0.3589  | 0.2770  | 0.1500  | 0.1378  |
| SOQ4e   |        |        |         |         |         |         |         |         |         |         |         |         | 1.0000  | 0.1190  | 0.0517  | 0.3863  | 0.3627  | 0.4423  | 0.2019  | 0.1827  |
| SOQ5a   |        |        |         |         |         |         |         |         |         |         |         |         |         | 1.0000  | -0.6064 | 0.3655  | 0.0754  | 0.2452  | 0.0372  | 0.0302  |
| SOQ5b   |        |        |         |         |         |         |         |         |         |         |         |         |         |         | 1.0000  | 0.0443  | 0.3438  | 0.1364  | 0.1123  | 0.0940  |
| SOQ5c   |        |        |         |         |         |         |         |         |         |         |         |         |         |         |         | 1.0000  | 0.6370  | 0.7758  | 0.3010  | 0.2710  |
| SOQ5d   |        |        |         |         |         |         |         |         |         |         |         |         |         |         |         |         | 1.0000  | 0.7516  | 0.3379  | 0.3116  |
| SOQ5e   |        |        |         |         |         |         |         |         |         |         |         |         |         |         |         |         |         | 1.0000  | 0.3313  | 0.3012  |
| MSPD10k |        |        |         |         |         |         |         |         |         |         |         |         |         |         |         |         |         |         | 1.0000  | 0.8880  |
| MSPD10l |        |        |         |         |         |         |         |         |         |         |         |         |         |         |         |         |         |         |         | 1.0000  |

Table SF55: Correlation Matrix of Summary & Expectation Items for Entire Sample.

Table SF55 illustrates that MIQ11 and TCS6 exhibit a notable positive correlation of 0.514, suggesting a strong relationship between these two variables in the sample. Additionally, MIQ12 demonstrates a high negative correlation with MIQ13 at -0.6968, as well as a strong positive correlation with TCS7 at 0.7738, indicating significant associations. Further, TCS8 shows a robust positive correlation with MIQ13 (0.7623), and OSRI20 correlates positively with both TCS6 (0.5864), suggesting that OSRI20 may align closely with constructs in TCS. Finally, MSPD10k and MSPD10l exhibit an exceptionally high correlation of 0.888, reflecting a close relationship between these two variables.

For the Summary and Expectation Items, we performed factor analysis for the entire sample.

**Number of Factors:** To determine the optimal number of factors, we computed (a) EKC and (b) PA as factor retention methods. While the EKC suggests six factors as sufficient, the PA suggests five. We first conducted the factor analysis (oblimin rotation) for five factors, resulting in a cumulative variance explained of 0.63. Factor 1 has an eigenvalue (variance explained) of 3.12 (0.16), Factor 2 has an eigenvalue (variance explained) of 2.90 (0.14), Factor 3 has an eigenvalue (variance explained) of 2.86 (0.14), Factor 4 has an eigenvalue (variance explained) of 1.86 (0.09), and Factor 5 has an eigenvalue (variance explained) of 1.77 (0.09).

| Item    | F1      | F2      | F3      | F4      | F5      |
|---------|---------|---------|---------|---------|---------|
| MIQ11   | 0.0190  | -0.0305 | -0.2855 | -0.1520 | 0.0300  |
| MIQ12   | -0.8744 | -0.0070 | 0.0664  | 0.0252  | -0.0119 |
| MIQ13   | 0.8272  | -0.0014 | 0.0804  | 0.0096  | -0.0435 |
| TCS6    | 0.1462  | -0.1062 | -0.4898 | -0.1099 | 0.1163  |
| TCS7    | -0.7951 | -0.0190 | -0.0730 | 0.0033  | 0.1068  |
| TCS8    | 0.8801  | -0.0011 | -0.0756 | -0.0096 | 0.0058  |
| OSRI19  | 0.1162  | -0.0382 | -0.1028 | 0.0539  | 0.0024  |
| OSRI20  | 0.0724  | -0.0288 | -0.5300 | -0.1205 | 0.0723  |
| SOQ4a   | 0.1922  | 0.5786  | -0.1185 | -0.0399 | -0.4842 |
| SOQ4b   | -0.1926 | 0.4529  | -0.1154 | -0.0098 | 0.5830  |
| SOQ4c   | -0.0480 | 0.9268  | 0.0278  | 0.00167 | -0.0400 |
| SOQ4d   | 0.0843  | 0.9118  | 0.0034  | 0.0328  | 0.1468  |
| SOQ4e   | -0.0491 | 0.7998  | 0.1934  | 0.0287  | -0.0431 |
| SOQ5a   | 0.2285  | 0.0499  | 0.2602  | -0.0054 | -0.6207 |
| SOQ5b   | -0.1849 | 0.0107  | 0.1320  | -0.0014 | 0.7643  |
| SOQ5c   | -0.0909 | 0.0900  | 0.8209  | 0.0009  | -0.1712 |
| SOQ5d   | 0.2151  | 0.0447  | 0.7397  | 0.0768  | 0.3660  |
| SOQ5e   | -0.0157 | 0.0051  | 0.9235  | 0.0060  | -0.0061 |
| MSPD10k | 0.0022  | -0.0010 | 0.0000  | 0.9621  | -0.0038 |
| MSPD10l | -0.0064 | 0.0033  | -0.0231 | 0.9318  | -0.0180 |

Table SF56: Factor Loadings Summary and Expectation Items (Oblimin) - Entire Sample.

Table SF56 shows that for the MIQ items, only the loading of MIQ13 on the first factor is very high, while that of MIQ12 is strongly negative. For the TCS items, only the loading of TCS8 is high, while that of TCS7 is strongly negative. In contrast, both OSRI19 and OSRI20 have low loadings. For the SOQ items, the loadings of SOQ4a, SOQ4c-e are very high on the same factor, while the loadings of SOQ4b are on another. Similarly, the loadings of SOQ5c-e are very high on the same factor, while the loadings of SOQ5b are on a different factor. For the MSPD items, the loadings of MSPD10k and MSPD10l are very high on the same factor.

#### 4.7. Disaggregated Correlation Patterns by Gender Identity

We conducted composite-level zero-order correlation analyses among the five scales—MIQ, TCS, OSRI, SOQ, and MSPD—separately for each gender identity group. This disaggregated approach addresses a key gap in the literature, as previous studies (cf. Tate et al., 2015) have not reported these associations stratified by gender identity. Across groups, the correlations in Table SF57 revealed both common and distinctive patterns in how these constructs relate.

Most notably, MIQ and TCS showed a consistent negative relationship that reached statistical significance in men ( $r = -.29, p < .001$ ), women ( $r = -.41, p < .001$ ), and transwomen ( $r = -.33, p < .05$ ). This pattern suggests that stronger internal affirmation of gender identity is reliably associated with less emphasis on traditional external gender expression across groups.

Among men, MIQ was significantly positively associated with SOQ ( $r = .24, p < .001$ ), indicating that internal gender identity may be linked to greater openness in sexuality. For women, the positive correlation between OSRI and MSPD was also significant ( $r = .29, p < .001$ ), suggesting that greater awareness of gender roles corresponds with heightened sensitivity to, or experiences of, gender-based discrimination.

Transwomen showed broadly positive—but nonsignificant—associations among OSRI, SOQ, and MSPD, alongside the significant negative MIQ–TCS link described above. Among transmen, MIQ was significantly positively associated with both OSRI ( $r = .31, p < .01$ ) and MSPD ( $r = .37, p < .001$ ), suggesting that a secure internal gender identity may be closely tied to both gender role engagement and experiences of marginalization in this group.

For non-binary participants, correlations were generally weaker and more variable. The strongest and significant association was between MIQ and OSRI ( $r = .26, p < .001$ ), while most other associations did not reach significance, reflecting the heterogeneous and often non-normative gender experiences in this group.

Overall, these results highlight the importance of disaggregated analysis when examining the intersection of gender identity, expression, roles, sexuality, and discrimination. The variability in strength and statistical significance of associations across groups underscores the complexity of gendered psychological experiences.

Table SF57: Composite-level correlations among scales by group

| Group                         | MIQ  | TCS                  | OSRI                | SOQ                  | MSPD                |
|-------------------------------|------|----------------------|---------------------|----------------------|---------------------|
| <b>Men</b>                    |      |                      |                     |                      |                     |
| MIQ                           | 1.00 | −0.29 <sup>***</sup> | 0.17 <sup>**</sup>  | 0.24 <sup>***</sup>  | 0.15 <sup>**</sup>  |
| TCS                           |      | 1.00                 | −0.04               | −0.23 <sup>***</sup> | −0.11 <sup>*</sup>  |
| OSRI                          |      |                      | 1.00                | 0.13 <sup>*</sup>    | 0.23 <sup>***</sup> |
| SOQ                           |      |                      |                     | 1.00                 | 0.21 <sup>***</sup> |
| MSPD                          |      |                      |                     |                      | 1.00                |
| <b>Women</b>                  |      |                      |                     |                      |                     |
| MIQ                           | 1.00 | −0.41 <sup>***</sup> | 0.19 <sup>***</sup> | 0.13 <sup>*</sup>    | 0.18 <sup>***</sup> |
| TCS                           |      | 1.00                 | −0.08               | −0.17 <sup>**</sup>  | −0.17 <sup>**</sup> |
| OSRI                          |      |                      | 1.00                | 0.06                 | 0.29 <sup>***</sup> |
| SOQ                           |      |                      |                     | 1.00                 | 0.14 <sup>*</sup>   |
| MSPD                          |      |                      |                     |                      | 1.00                |
| <b>Transwomen</b>             |      |                      |                     |                      |                     |
| MIQ                           | 1.00 | −0.33 <sup>*</sup>   | 0.24                | 0.27                 | 0.24                |
| TCS                           |      | 1.00                 | −0.12               | −0.28                | −0.23               |
| OSRI                          |      |                      | 1.00                | 0.24                 | 0.24                |
| SOQ                           |      |                      |                     | 1.00                 | 0.19                |
| MSPD                          |      |                      |                     |                      | 1.00                |
| <b>Transmen</b>               |      |                      |                     |                      |                     |
| MIQ                           | 1.00 | 0.04                 | 0.31 <sup>**</sup>  | 0.17                 | 0.37 <sup>***</sup> |
| TCS                           |      | 1.00                 | −0.08               | −0.01                | −0.08               |
| OSRI                          |      |                      | 1.00                | 0.13                 | 0.17                |
| SOQ                           |      |                      |                     | 1.00                 | 0.12                |
| MSPD                          |      |                      |                     |                      | 1.00                |
| <b>Non-binary individuals</b> |      |                      |                     |                      |                     |
| MIQ                           | 1.00 | −0.01                | 0.26 <sup>***</sup> | −0.04                | 0.03                |
| TCS                           |      | 1.00                 | 0.09                | −0.11                | −0.04               |
| OSRI                          |      |                      | 1.00                | 0.00                 | 0.19 <sup>**</sup>  |
| SOQ                           |      |                      |                     | 1.00                 | 0.09                |
| MSPD                          |      |                      |                     |                      | 1.00                |

Note. Superscripts denote significance:  $\cdot p < .10$ ,  $*p < .05$ ,  $**p < .01$ ,  $***p < .001$  (Holm-adjusted).

## 5. Factor Analysis

We first examined the inter-correlations of the variables of the subscales excluding the summary and expectation items, see in Table SF58 to identify variables with high correlation coefficients. This allowed us to identify strongly correlated pairwise relationships, defined as correlations exceeding  $\pm 0.80$  (Berry, 1985), which could indicate the presence of multicollinearity in the dataset.



In Table SF59, we list all unique pairs of variables with correlations exceeding  $\pm 0.80$ :

| Variable 1 | Variable 2 |
|------------|------------|
| TCS2       | TCS3       |
| SOQ1a      | SOQ3a      |
| SOQ1c      | SOQ3c      |
| SOQ3b      | SOQ3d      |
| SOQ3b      | SOQ3e      |
| SOQ3d      | SOQ3e      |
| MSPD1c     | MSPD1d     |
| MSPD1c     | MSPD1e     |
| MSPD2c     | MSPD2d     |
| MSPD2c     | MSPD2e     |
| MSPD3c     | MSPD3d     |
| MSPD3c     | MSPD3e     |
| MSPD4c     | MSPD4d     |
| MSPD4c     | MSPD4e     |
| MSPD5c     | MSPD5d     |
| MSPD5c     | MSPD5e     |
| MSPD6c     | MSPD6d     |
| MSPD6c     | MSPD6e     |
| MSPD7c     | MSPD7d     |
| MSPD7c     | MSPD7e     |
| MSPD8c     | MSPD8d     |
| MSPD8c     | MSPD8e     |
| MSPD9c     | MSPD9d     |
| MSPD9c     | MSPD9e     |
| MSPD10a    | MSPD10b    |
| MSPD10h    | MSPD10i    |

Table SF59: Highly correlated pairs of variables exceeding  $\pm 0.80$ .

Last, we excluded one variable from each highly correlated pair, see in Table SF59, to calculate the Variance Inflation Factor (VIF) for the remaining variables. A VIF greater than 10, (O'Brien, 2007), indicates potential multicollinearity issues. In our dataset, see Table SF60, the VIF values for most variables were below this threshold, suggesting that multicollinearity is not a significant concern.

| Item    | VIF   |
|---------|-------|---------|-------|---------|-------|---------|-------|---------|-------|
| MIQ1    | 1.734 | MIQ3    | 2.166 | MIQ4    | 2.079 | MIQ5    | 2.558 | MIQ6    | 2.969 |
| MIQ7    | 3.479 | MIQ9    | 3.199 | MIQ10   | 3.162 | TCS1    | 2.936 | TCS2    | 3.553 |
| TCS4    | 3.153 | TCS5    | 2.815 | OSRI1   | 1.412 | OSRI2   | 1.414 | OSRI3   | 1.397 |
| OSRI4   | 1.231 | OSRI5   | 1.343 | OSRI6   | 1.485 | OSRI7   | 1.317 | OSRI8   | 1.372 |
| OSRI9   | 1.352 | OSRI10  | 1.419 | OSRI11  | 1.364 | OSRI12  | 1.421 | OSRI13  | 1.543 |
| OSRI14  | 1.384 | OSRI15  | 1.599 | OSRI16  | 1.394 | OSRI17  | 1.308 | OSRI18  | 1.570 |
| SOQ1a   | 3.383 | SOQ1b   | 5.986 | SOQ1c   | 3.171 | SOQ1d   | 4.462 | SOQ1e   | 5.353 |
| SOQ2a   | 3.698 | SOQ2b   | 3.387 | SOQ2c   | 3.554 | SOQ2d   | 4.120 | SOQ2e   | 4.466 |
| SOQ3b   | 5.913 | SOQ3e   | 6.797 | MSPD1a  | 2.249 | MSPD1b  | 2.258 | MSPD1c  | 5.207 |
| MSPD1e  | 4.559 | MSPD2a  | 2.566 | MSPD2b  | 3.570 | MSPD2c  | 8.172 | MSPD2e  | 7.881 |
| MSPD3a  | 2.857 | MSPD3b  | 3.936 | MSPD3c  | 6.885 | MSPD3e  | 6.618 | MSPD4a  | 2.528 |
| MSPD4b  | 3.964 | MSPD4c  | 7.380 | MSPD4e  | 6.374 | MSPD5a  | 2.589 | MSPD5b  | 2.893 |
| MSPD5c  | 6.863 | MSPD5e  | 7.776 | MSPD6a  | 2.747 | MSPD6b  | 3.791 | MSPD6c  | 8.106 |
| MSPD6e  | 7.536 | MSPD7a  | 1.974 | MSPD7b  | 2.018 | MSPD7c  | 5.458 | MSPD7e  | 4.815 |
| MSPD8a  | 2.199 | MSPD8b  | 2.644 | MSPD8c  | 7.157 | MSPD8e  | 7.449 | MSPD9a  | 2.150 |
| MSPD9b  | 3.003 | MSPD9c  | 6.692 | MSPD9e  | 6.063 | MSPD10a | 3.320 | MSPD10c | 2.582 |
| MSPD10d | 3.239 | MSPD10e | 2.466 | MSPD10f | 3.517 | MSPD10g | 2.498 | MSPD10h | 3.501 |
| MSPD10j | 2.883 |         |       |         |       |         |       |         |       |

Table SF60: Variance Inflation Factor (VIF) for Assessing Multicollinearity.

|             | <b>Item</b> | <b>KMO</b> | <b>Item</b> | <b>KMO</b> | <b>Item</b> | <b>KMO</b> | <b>Item</b> | <b>KMO</b> |
|-------------|-------------|------------|-------------|------------|-------------|------------|-------------|------------|
| <b>MIQ</b>  | MIQ1        | 0.92       | MIQ3        | 0.86       | MIQ4        | 0.85       | MIQ5        | 0.90       |
|             | MIQ6        | 0.87       | MIQ7        | 0.90       | MIQ9        | 0.94       | MIQ10       | 0.93       |
| <b>TCS</b>  | TCS1        | 0.95       | TCS2        | 0.93       | TCS3        | 0.95       | TCS4        | 0.90       |
|             | TCS5        | 0.85       |             |            |             |            |             |            |
| <b>OSRI</b> | OSRI1       | 0.82       | OSRI2       | 0.88       | OSRI3       | 0.95       | OSRI4       | 0.86       |
|             | OSRI5       | 0.94       | OSRI6       | 0.84       | OSRI7       | 0.87       | OSRI8       | 0.88       |
|             | OSRI9       | 0.93       | OSRI10      | 0.82       | OSRI11      | 0.92       | OSRI12      | 0.90       |
|             | OSRI13      | 0.87       | OSRI14      | 0.80       | OSRI15      | 0.84       | OSRI16      | 0.85       |
|             | OSRI17      | 0.85       | OSRI18      | 0.92       |             |            |             |            |
| <b>SOQ</b>  | SOQ1a       | 0.77       | SOQ1b       | 0.75       | SOQ1c       | 0.80       | SOQ1d       | 0.75       |
|             | SOQ1e       | 0.85       | SOQ2a       | 0.89       | SOQ2b       | 0.93       | SOQ2c       | 0.89       |
|             | SOQ2d       | 0.93       | SOQ2e       | 0.95       | SOQ3a       | 0.79       | SOQ3b       | 0.78       |
|             | SOQ3c       | 0.80       | SOQ3d       | 0.77       | SOQ3e       | 0.87       |             |            |
| <b>MSPD</b> | MSPD1a      | 0.90       | MSPD1b      | 0.96       | MSPD1c      | 0.96       | MSPD1d      | 0.94       |
|             | MSPD1e      | 0.96       | MSPD2a      | 0.89       | MSPD2b      | 0.97       | MSPD2c      | 0.95       |
|             | MSPD2d      | 0.95       | MSPD2e      | 0.97       | MSPD3a      | 0.89       | MSPD3b      | 0.97       |
|             | MSPD3c      | 0.96       | MSPD3d      | 0.95       | MSPD3e      | 0.97       | MSPD4a      | 0.90       |
|             | MSPD4b      | 0.97       | MSPD4c      | 0.96       | MSPD4d      | 0.96       | MSPD4e      | 0.97       |
|             | MSPD5a      | 0.90       | MSPD5b      | 0.96       | MSPD5c      | 0.96       | MSPD5d      | 0.95       |
|             | MSPD5e      | 0.96       | MSPD6a      | 0.89       | MSPD6b      | 0.96       | MSPD6c      | 0.96       |
|             | MSPD6d      | 0.95       | MSPD6e      | 0.97       | MSPD7a      | 0.92       | MSPD7b      | 0.96       |
|             | MSPD7c      | 0.96       | MSPD7d      | 0.95       | MSPD7e      | 0.97       | MSPD8a      | 0.89       |
|             | MSPD8b      | 0.95       | MSPD8c      | 0.92       | MSPD8d      | 0.91       | MSPD8e      | 0.95       |
|             | MSPD9a      | 0.86       | MSPD9b      | 0.96       | MSPD9c      | 0.95       | MSPD9d      | 0.94       |
|             | MSPD9e      | 0.97       | MSPD10a     | 0.94       | MSPD10b     | 0.94       | MSPD10c     | 0.97       |
|             | MSPD10d     | 0.96       | MSPD10e     | 0.95       | MSPD10f     | 0.97       | MSPD10g     | 0.95       |
|             | MSPD10h     | 0.97       | MSPD10i     | 0.96       | MSPD10j     | 0.97       |             |            |

Table SF61: KMO Sampling Adequacy Measure for Individual Items in Factor Analysis.

We checked the Kaiser-Meyer-Olkin (KMO) Measure of Sampling Adequacy and Bartlett's Test of Sphericity to confirm the suitability of our data for factor analysis, see Table SF61. All of the individual items are exceeding the threshold of 0.50.

## 5.2. Exploratory Factor Analysis - Excluding Supplementary Items

We conducted EFA of the five subscales, excluding the supplementary items. The EKC suggests 18 and PA 13 factors. Therefore, we started by hierarchically reducing the number of factors, beginning with the highest suggestion of 18 (EKC) and systematically decreasing to 13 (PA), to identify the difference(s) between the factor solutions.

For each factor solution, we provide the eigenvalues, variance explained, and cumulative variance for each factor, see Tables SF62, SF65, SF68, SF71, SF74 and SF77, and for each factor solution we provide the items of each factor that exceeded the threshold of 0.40, see Tables SF64, SF67, SF70, SF73, SF76 and SF79.

| <b>Factors</b> | <b>Eigenvalues</b> | <b>VAR</b> | <b>CUM</b> |
|----------------|--------------------|------------|------------|
| 1              | 6.3891             | 0.0633     | 0.0633     |
| 2              | 4.7512             | 0.0470     | 0.1103     |
| 3              | 4.6807             | 0.0463     | 0.1566     |
| 4              | 4.3823             | 0.0434     | 0.2000     |
| 5              | 2.9495             | 0.0292     | 0.2292     |
| 6              | 2.7257             | 0.0270     | 0.2562     |
| 7              | 2.6429             | 0.0262     | 0.2824     |
| 8              | 2.6197             | 0.0259     | 0.3083     |
| 9              | 2.1318             | 0.0211     | 0.3294     |
| 10             | 2.0723             | 0.0205     | 0.3500     |
| 11             | 2.0485             | 0.0203     | 0.3702     |
| 12             | 2.0400             | 0.0202     | 0.3904     |
| 13             | 1.9515             | 0.0193     | 0.4098     |
| 14             | 1.8282             | 0.0181     | 0.4279     |
| 15             | 1.7559             | 0.0174     | 0.4452     |
| 16             | 1.5164             | 0.0150     | 0.4603     |
| 17             | 1.2781             | 0.0127     | 0.4729     |
| 18             | 0.6856             | 0.0068     | 0.4797     |

Table SF62: Factors, Eigenvalues, Variance Explained, and Cumulative Variance for 18 Factors (Oblimin Rotation).

| Items         | F1     | F2     | F3     | F4     | F5     | F6     | F7     | F8     | F9     | F10    | F11    | F12    | F13    | F14    | F15    | F16    | F17    | F18    |
|---------------|--------|--------|--------|--------|--------|--------|--------|--------|--------|--------|--------|--------|--------|--------|--------|--------|--------|--------|
| <b>MIQ1</b>   | -0.054 | -0.065 | 0.004  | 0.592  | 0.013  | -0.046 | 0.167  | -0.011 | 0.005  | 0.020  | -0.015 | 0.071  | -0.026 | 0.021  | -0.023 | -0.012 | -0.011 | -0.014 |
| <b>MIQ3</b>   | 0.115  | -0.081 | -0.457 | 0.085  | -0.005 | 0.017  | 0.100  | 0.058  | -0.120 | -0.017 | -0.032 | -0.034 | -0.048 | 0.000  | -0.077 | -0.009 | 0.063  | 0.088  |
| <b>MIQ4</b>   | -0.086 | 0.076  | 0.442  | 0.063  | 0.032  | -0.050 | -0.001 | 0.004  | 0.148  | 0.036  | 0.039  | 0.023  | 0.055  | 0.033  | 0.046  | -0.019 | -0.041 | -0.116 |
| <b>MIQ5</b>   | -0.091 | 0.141  | 0.585  | -0.030 | 0.021  | -0.041 | 0.120  | -0.097 | 0.147  | 0.021  | 0.023  | 0.022  | 0.018  | -0.017 | 0.001  | 0.042  | -0.018 | -0.045 |
| <b>MIQ6</b>   | 0.065  | -0.003 | 0.020  | -0.406 | -0.009 | -0.057 | 0.261  | 0.049  | -0.017 | 0.002  | 0.059  | -0.023 | -0.039 | -0.043 | -0.020 | 0.011  | 0.050  | -0.001 |
| <b>MIQ7</b>   | 0.063  | -0.058 | 0.033  | -0.420 | 0.007  | -0.076 | 0.301  | 0.063  | -0.017 | 0.029  | 0.076  | 0.002  | -0.031 | 0.013  | 0.022  | -0.064 | 0.039  | -0.017 |
| <b>MIQ9</b>   | 0.044  | 0.034  | -0.007 | -0.504 | 0.061  | 0.035  | 0.245  | -0.045 | 0.023  | 0.027  | 0.017  | 0.053  | -0.013 | 0.084  | 0.112  | -0.073 | -0.048 | -0.027 |
| <b>MIQ10</b>  | 0.095  | 0.033  | 0.048  | -0.441 | 0.040  | 0.033  | 0.240  | -0.068 | 0.088  | 0.022  | 0.002  | 0.059  | -0.003 | 0.089  | 0.110  | -0.043 | -0.083 | -0.050 |
| <b>TCS1</b>   | 0.002  | 0.054  | 0.011  | 0.711  | 0.034  | -0.093 | -0.085 | -0.057 | 0.002  | -0.037 | -0.007 | -0.026 | -0.034 | 0.009  | 0.018  | -0.001 | -0.033 | -0.031 |
| <b>TCS2</b>   | 0.002  | 0.001  | 0.033  | 0.816  | -0.007 | -0.061 | -0.052 | -0.006 | 0.009  | -0.020 | 0.002  | -0.044 | -0.027 | -0.006 | -0.027 | -0.021 | -0.011 | 0.016  |
| <b>TCS3</b>   | -0.037 | 0.018  | -0.027 | 0.793  | -0.014 | -0.035 | -0.094 | 0.020  | -0.005 | -0.021 | -0.017 | -0.043 | 0.006  | -0.011 | -0.038 | 0.013  | 0.010  | 0.017  |
| <b>TCS4</b>   | -0.042 | -0.005 | -0.005 | 0.793  | 0.023  | 0.043  | 0.122  | 0.019  | -0.037 | 0.012  | -0.006 | 0.030  | -0.019 | 0.003  | 0.006  | -0.027 | -0.003 | 0.010  |
| <b>TCS5</b>   | 0.029  | -0.049 | 0.005  | 0.726  | -0.011 | 0.074  | 0.080  | -0.031 | -0.048 | 0.037  | 0.056  | 0.117  | 0.002  | -0.002 | 0.065  | -0.044 | -0.031 | -0.050 |
| <b>OSRI1</b>  | 0.078  | 0.169  | 0.118  | -0.002 | 0.019  | -0.117 | 0.147  | -0.046 | 0.063  | -0.038 | 0.014  | -0.003 | 0.079  | -0.028 | -0.047 | 0.016  | 0.004  | -0.042 |
| <b>OSRI2</b>  | 0.128  | 0.003  | -0.143 | 0.135  | -0.025 | -0.029 | 0.232  | 0.009  | -0.028 | 0.066  | -0.025 | 0.033  | -0.040 | 0.054  | 0.055  | 0.009  | -0.050 | 0.055  |
| <b>OSRI3</b>  | 0.043  | 0.005  | -0.053 | -0.141 | 0.028  | 0.106  | 0.082  | 0.065  | -0.007 | -0.036 | 0.102  | 0.054  | 0.058  | -0.016 | 0.091  | -0.002 | 0.026  | -0.074 |
| <b>OSRI4</b>  | 0.102  | 0.029  | -0.064 | 0.011  | 0.028  | 0.022  | 0.073  | 0.031  | -0.038 | 0.014  | 0.029  | -0.010 | 0.045  | 0.028  | -0.012 | -0.050 | -0.000 | 0.021  |
| <b>OSRI5</b>  | -0.076 | 0.116  | 0.156  | 0.049  | 0.007  | 0.002  | -0.082 | -0.123 | 0.037  | 0.023  | -0.109 | -0.028 | 0.030  | -0.025 | -0.075 | -0.015 | -0.027 | -0.028 |
| <b>OSRI6</b>  | 0.045  | 0.156  | 0.204  | 0.012  | 0.080  | -0.070 | 0.174  | 0.019  | 0.047  | -0.001 | -0.025 | -0.002 | 0.031  | -0.042 | -0.037 | 0.001  | 0.026  | -0.035 |
| <b>OSRI7</b>  | 0.166  | -0.074 | -0.211 | 0.123  | -0.010 | -0.083 | 0.134  | 0.029  | -0.028 | -0.027 | -0.030 | -0.034 | -0.003 | -0.029 | 0.058  | -0.015 | 0.067  | 0.050  |
| <b>OSRI8</b>  | 0.085  | 0.090  | 0.205  | 0.021  | 0.067  | -0.067 | 0.041  | -0.030 | -0.003 | -0.047 | 0.010  | -0.053 | 0.055  | -0.110 | -0.089 | 0.016  | -0.035 | -0.082 |
| <b>OSRI9</b>  | 0.131  | 0.032  | -0.093 | -0.098 | 0.030  | 0.043  | 0.161  | 0.046  | -0.073 | -0.044 | 0.041  | 0.024  | 0.025  | 0.000  | 0.003  | 0.005  | 0.015  | 0.052  |
| <b>OSRI10</b> | 0.006  | 0.178  | 0.050  | -0.082 | 0.006  | -0.007 | 0.058  | 0.017  | 0.079  | -0.050 | 0.019  | -0.013 | 0.031  | 0.018  | -0.035 | 0.018  | -0.051 | -0.028 |
| <b>OSRI11</b> | 0.114  | 0.093  | -0.130 | -0.004 | 0.051  | 0.069  | 0.236  | 0.032  | -0.037 | -0.045 | -0.001 | -0.022 | -0.006 | -0.005 | 0.022  | -0.002 | 0.049  | 0.048  |
| <b>OSRI12</b> | 0.095  | -0.046 | -0.210 | 0.061  | 0.059  | -0.041 | 0.178  | 0.053  | -0.062 | 0.071  | 0.025  | -0.105 | 0.019  | -0.032 | 0.012  | -0.039 | 0.087  | 0.055  |
| <b>OSRI13</b> | 0.030  | 0.171  | 0.282  | 0.069  | -0.023 | -0.100 | 0.173  | -0.079 | 0.067  | 0.050  | -0.049 | -0.045 | 0.102  | 0.007  | -0.065 | 0.020  | 0.046  | -0.050 |
| <b>OSRI14</b> | 0.122  | 0.046  | -0.143 | 0.187  | 0.010  | -0.082 | 0.141  | 0.014  | -0.023 | 0.050  | 0.009  | -0.059 | 0.028  | -0.039 | -0.028 | -0.036 | 0.037  | 0.040  |
| <b>OSRI15</b> | 0.072  | 0.229  | 0.219  | 0.012  | -0.030 | -0.058 | 0.160  | -0.045 | 0.014  | -0.006 | -0.010 | -0.032 | 0.049  | -0.048 | -0.075 | 0.059  | 0.072  | -0.043 |
| <b>OSRI16</b> | 0.144  | 0.006  | -0.249 | 0.185  | 0.039  | -0.051 | 0.196  | 0.012  | -0.083 | -0.013 | -0.083 | -0.104 | 0.022  | 0.042  | 0.003  | 0.045  | 0.022  | 0.068  |
| <b>OSRI17</b> | 0.018  | 0.162  | 0.173  | 0.040  | -0.006 | -0.020 | 0.046  | -0.007 | 0.008  | -0.022 | 0.006  | -0.006 | 0.030  | -0.035 | -0.025 | -0.017 | 0.024  | -0.016 |
| <b>OSRI18</b> | 0.112  | -0.015 | -0.137 | 0.042  | 0.019  | -0.018 | 0.281  | 0.053  | -0.035 | 0.050  | 0.019  | -0.038 | -0.013 | 0.000  | 0.077  | -0.053 | 0.056  | 0.084  |
| <b>SOQ1a</b>  | -0.014 | 0.009  | -0.798 | 0.050  | 0.022  | 0.010  | -0.044 | -0.016 | 0.363  | 0.011  | 0.016  | -0.015 | 0.033  | -0.014 | 0.006  | 0.001  | 0.005  | -0.033 |
| <b>SOQ1b</b>  | 0.016  | -0.001 | -0.032 | -0.035 | 0.009  | 0.019  | 0.006  | 0.022  | 0.976  | -0.003 | 0.001  | 0.005  | -0.006 | 0.003  | -0.000 | 0.010  | 0.003  | -0.000 |
| <b>SOQ1c</b>  | -0.021 | 0.028  | 0.699  | 0.100  | -0.005 | 0.157  | -0.033 | -0.012 | 0.333  | 0.000  | 0.019  | -0.046 | 0.043  | -0.032 | -0.016 | -0.009 | 0.026  | -0.010 |

| Items  | F1     | F2     | F3     | F4     | F5     | F6     | F7     | F8     | F9     | F10    | F11    | F12    | F13    | F14    | F15    | F16    | F17    | F18    |
|--------|--------|--------|--------|--------|--------|--------|--------|--------|--------|--------|--------|--------|--------|--------|--------|--------|--------|--------|
| SOQ1d  | 0.036  | -0.009 | 0.039  | -0.041 | -0.035 | 0.297  | 0.074  | -0.039 | 0.605  | 0.039  | -0.026 | -0.002 | 0.005  | 0.042  | -0.001 | -0.012 | -0.020 | 0.013  |
| SOQ1e  | 0.023  | -0.057 | 0.050  | -0.068 | -0.022 | 0.160  | 0.212  | 0.007  | 0.559  | 0.004  | -0.007 | 0.047  | -0.025 | 0.056  | 0.033  | -0.027 | 0.046  | 0.014  |
| SOQ2a  | 0.029  | -0.002 | -0.819 | 0.069  | 0.013  | -0.025 | 0.212  | -0.018 | 0.024  | 0.005  | -0.001 | -0.006 | 0.047  | -0.016 | 0.008  | -0.004 | 0.007  | -0.001 |
| SOQ2b  | 0.040  | 0.023  | -0.116 | -0.028 | 0.041  | -0.029 | 0.684  | 0.014  | 0.201  | 0.041  | 0.026  | -0.020 | 0.033  | 0.016  | -0.001 | 0.017  | 0.001  | -0.019 |
| SOQ2c  | 0.008  | 0.082  | 0.711  | 0.053  | 0.016  | 0.092  | 0.281  | -0.005 | -0.011 | -0.032 | 0.022  | -0.005 | 0.032  | -0.030 | -0.024 | 0.047  | 0.036  | -0.021 |
| SOQ2d  | 0.018  | -0.001 | 0.072  | -0.081 | -0.020 | 0.131  | 0.721  | 0.013  | 0.009  | 0.049  | -0.011 | -0.006 | 0.047  | 0.031  | 0.036  | 0.027  | 0.021  | 0.026  |
| SOQ2e  | 0.033  | -0.055 | 0.038  | -0.100 | -0.006 | 0.064  | 0.748  | 0.056  | -0.004 | 0.017  | 0.045  | 0.038  | 0.011  | 0.035  | 0.028  | 0.015  | 0.046  | -0.006 |
| SOQ3a  | -0.024 | 0.020  | -0.805 | 0.017  | 0.013  | 0.418  | -0.057 | -0.015 | 0.026  | 0.004  | 0.041  | -0.013 | 0.042  | 0.006  | 0.006  | 0.011  | -0.001 | -0.036 |
| SOQ3b  | 0.013  | 0.013  | -0.099 | -0.039 | 0.035  | 0.740  | -0.003 | 0.030  | 0.259  | -0.000 | 0.007  | -0.003 | 0.010  | -0.004 | 0.013  | 0.037  | -0.013 | -0.012 |
| SOQ3c  | -0.008 | 0.036  | 0.621  | 0.096  | 0.017  | 0.582  | -0.066 | -0.008 | 0.030  | -0.023 | 0.004  | -0.030 | 0.035  | -0.031 | -0.011 | 0.019  | 0.009  | -0.015 |
| SOQ3d  | 0.016  | 0.020  | -0.043 | -0.054 | 0.013  | 0.915  | 0.046  | -0.011 | 0.036  | 0.030  | 0.010  | -0.007 | -0.007 | 0.016  | -0.001 | 0.005  | -0.008 | 0.005  |
| SOQ3e  | 0.028  | -0.032 | -0.010 | -0.075 | -0.010 | 0.730  | 0.162  | 0.023  | 0.090  | -0.023 | 0.001  | 0.059  | -0.006 | 0.034  | 0.024  | -0.007 | 0.029  | 0.002  |
| MSPD1a | 0.033  | 0.712  | 0.036  | -0.026 | -0.026 | -0.012 | 0.011  | -0.044 | -0.003 | -0.046 | 0.127  | -0.028 | -0.014 | -0.047 | 0.021  | -0.002 | -0.020 | -0.028 |
| MSPD1b | 0.019  | 0.014  | -0.016 | -0.090 | -0.011 | -0.009 | 0.098  | 0.490  | 0.039  | 0.010  | 0.323  | -0.015 | 0.028  | -0.005 | 0.037  | -0.029 | -0.021 | 0.027  |
| MSPD1c | 0.018  | -0.036 | 0.001  | 0.010  | 0.044  | 0.005  | 0.045  | 0.045  | -0.017 | -0.014 | 0.730  | 0.076  | 0.034  | 0.097  | 0.088  | 0.030  | -0.021 | -0.112 |
| MSPD1d | 0.010  | 0.013  | -0.013 | 0.005  | 0.036  | -0.007 | -0.055 | -0.009 | -0.009 | 0.030  | 0.821  | 0.014  | 0.041  | 0.009  | -0.035 | 0.034  | 0.097  | -0.072 |
| MSPD1e | 0.020  | 0.033  | 0.014  | -0.001 | 0.025  | 0.004  | 0.025  | 0.001  | -0.001 | 0.050  | 0.740  | 0.026  | 0.031  | 0.063  | 0.026  | 0.040  | -0.013 | 0.223  |
| MSPD2a | -0.011 | 0.777  | -0.010 | -0.025 | 0.017  | -0.009 | -0.011 | -0.064 | 0.035  | -0.019 | 0.044  | -0.003 | 0.013  | 0.018  | -0.086 | -0.007 | -0.019 | 0.019  |
| MSPD2b | 0.036  | -0.046 | 0.001  | -0.043 | 0.025  | 0.002  | 0.056  | 0.582  | 0.006  | 0.027  | 0.106  | -0.002 | 0.081  | 0.226  | 0.046  | 0.000  | 0.018  | -0.036 |
| MSPD2c | 0.011  | -0.025 | -0.000 | 0.007  | 0.035  | 0.004  | 0.030  | 0.025  | 0.001  | 0.039  | 0.025  | 0.001  | 0.046  | 0.823  | 0.068  | 0.046  | 0.001  | -0.078 |
| MSPD2d | 0.025  | 0.007  | -0.014 | -0.018 | 0.014  | -0.001 | -0.053 | -0.001 | 0.014  | 0.031  | 0.109  | -0.013 | 0.071  | 0.660  | 0.021  | 0.057  | 0.161  | -0.041 |
| MSPD2e | 0.021  | 0.007  | 0.013  | -0.002 | 0.024  | 0.004  | -0.003 | -0.005 | 0.023  | 0.070  | 0.106  | 0.028  | 0.055  | 0.645  | 0.029  | 0.045  | 0.060  | 0.240  |
| MSPD3a | -0.008 | 0.780  | 0.003  | 0.024  | -0.020 | -0.019 | 0.012  | -0.001 | -0.010 | -0.064 | -0.004 | -0.073 | 0.053  | -0.034 | -0.046 | 0.012  | 0.041  | 0.036  |
| MSPD3b | 0.041  | -0.028 | 0.018  | 0.035  | -0.022 | 0.000  | 0.020  | 0.591  | 0.019  | 0.022  | 0.072  | 0.067  | 0.038  | 0.095  | 0.060  | 0.063  | 0.231  | -0.055 |
| MSPD3c | -0.020 | -0.055 | 0.012  | -0.002 | 0.064  | -0.012 | 0.057  | 0.078  | 0.016  | 0.060  | 0.028  | 0.049  | 0.041  | 0.210  | 0.164  | 0.071  | 0.474  | -0.060 |
| MSPD3d | 0.019  | -0.004 | -0.005 | -0.028 | 0.046  | -0.001 | 0.009  | -0.005 | -0.000 | 0.072  | 0.060  | 0.021  | 0.044  | 0.052  | 0.061  | 0.056  | 0.772  | -0.029 |
| MSPD3e | 0.012  | -0.017 | 0.002  | -0.011 | 0.043  | -0.007 | 0.029  | 0.003  | 0.023  | 0.094  | 0.059  | 0.086  | 0.067  | 0.112  | 0.121  | 0.086  | 0.447  | 0.293  |
| MSPD4a | -0.024 | 0.756  | -0.001 | 0.023  | 0.004  | 0.003  | 0.000  | 0.012  | 0.005  | -0.081 | -0.043 | -0.050 | 0.012  | -0.041 | 0.131  | 0.014  | 0.021  | 0.038  |
| MSPD4b | 0.083  | 0.045  | -0.026 | -0.029 | 0.019  | -0.001 | 0.075  | 0.477  | 0.004  | 0.049  | 0.063  | 0.037  | 0.029  | -0.020 | 0.414  | 0.017  | -0.012 | -0.014 |
| MSPD4c | 0.039  | 0.002  | -0.002 | -0.005 | 0.051  | 0.009  | -0.004 | 0.014  | -0.005 | 0.075  | 0.028  | 0.031  | 0.050  | 0.114  | 0.694  | 0.064  | 0.051  | -0.065 |
| MSPD4d | 0.041  | 0.018  | 0.000  | -0.028 | 0.036  | 0.003  | -0.029 | -0.026 | -0.011 | 0.074  | 0.056  | 0.040  | 0.061  | 0.060  | 0.702  | 0.055  | 0.107  | -0.043 |
| MSPD4e | 0.041  | -0.007 | 0.012  | -0.025 | 0.025  | -0.016 | 0.015  | -0.015 | 0.027  | 0.073  | 0.042  | 0.018  | 0.082  | 0.062  | 0.588  | 0.084  | 0.111  | 0.235  |
| MSPD5a | -0.045 | 0.768  | 0.006  | -0.021 | -0.016 | 0.029  | -0.009 | 0.051  | -0.062 | -0.024 | -0.014 | 0.050  | -0.029 | 0.013  | 0.078  | 0.110  | -0.010 | -0.064 |
| MSPD5b | 0.096  | 0.106  | -0.003 | -0.036 | 0.026  | 0.042  | 0.051  | 0.583  | -0.008 | 0.021  | 0.001  | -0.044 | -0.007 | 0.037  | -0.008 | 0.330  | -0.029 | 0.085  |
| MSPD5c | 0.016  | -0.016 | 0.002  | -0.022 | 0.059  | -0.001 | 0.028  | 0.034  | -0.007 | 0.041  | 0.063  | 0.093  | 0.057  | 0.103  | 0.089  | 0.675  | 0.008  | -0.085 |

| Items   | F1     | F2     | F3     | F4     | F5     | F6     | F7     | F8     | F9     | F10    | F11    | F12    | F13    | F14    | F15    | F16    | F17    | F18    |
|---------|--------|--------|--------|--------|--------|--------|--------|--------|--------|--------|--------|--------|--------|--------|--------|--------|--------|--------|
| MSPD5d  | 0.051  | -0.002 | 0.001  | -0.029 | 0.058  | 0.004  | -0.025 | -0.004 | -0.010 | 0.083  | 0.077  | 0.054  | 0.067  | 0.037  | 0.012  | 0.673  | 0.131  | -0.074 |
| MSPD5e  | 0.024  | 0.016  | 0.012  | 0.003  | 0.058  | 0.000  | 0.025  | 0.003  | 0.023  | 0.106  | 0.055  | 0.081  | 0.035  | 0.071  | 0.091  | 0.582  | 0.058  | 0.250  |
| MSPD6a  | 0.011  | 0.732  | 0.009  | -0.013 | 0.028  | 0.021  | -0.035 | -0.001 | 0.000  | 0.173  | -0.037 | -0.096 | -0.016 | -0.035 | -0.033 | -0.088 | -0.069 | 0.045  |
| MSPD6b  | 0.060  | 0.055  | 0.008  | -0.033 | 0.016  | -0.012 | -0.017 | 0.555  | 0.019  | 0.444  | -0.005 | 0.009  | 0.014  | 0.018  | 0.037  | -0.023 | -0.021 | -0.043 |
| MSPD6c  | 0.009  | -0.042 | -0.009 | -0.001 | 0.033  | 0.003  | 0.040  | 0.028  | -0.018 | 0.743  | 0.025  | 0.039  | 0.049  | 0.077  | 0.096  | 0.052  | 0.018  | -0.100 |
| MSPD6d  | 0.028  | -0.013 | 0.002  | -0.006 | 0.029  | -0.007 | -0.011 | -0.029 | -0.000 | 0.779  | 0.047  | 0.029  | 0.058  | 0.023  | 0.040  | 0.051  | 0.099  | -0.068 |
| MSPD6e  | 0.029  | -0.006 | 0.006  | -0.011 | 0.033  | 0.015  | 0.024  | -0.009 | 0.012  | 0.732  | 0.031  | 0.039  | 0.069  | 0.045  | 0.014  | 0.059  | 0.035  | 0.204  |
| MSPD7a  | 0.108  | 0.572  | 0.007  | 0.001  | -0.016 | 0.000  | 0.053  | 0.031  | 0.030  | 0.019  | -0.026 | 0.086  | -0.027 | 0.060  | 0.043  | 0.019  | -0.038 | -0.100 |
| MSPD7b  | 0.027  | 0.059  | 0.010  | -0.063 | 0.079  | 0.022  | 0.018  | 0.499  | -0.040 | -0.016 | -0.022 | -0.082 | 0.337  | -0.041 | 0.013  | -0.015 | 0.026  | 0.047  |
| MSPD7c  | 0.031  | -0.040 | -0.006 | -0.024 | 0.029  | -0.002 | 0.055  | 0.022  | -0.025 | 0.018  | 0.030  | 0.100  | 0.726  | 0.086  | 0.064  | 0.040  | -0.028 | -0.121 |
| MSPD7d  | 0.020  | 0.012  | -0.025 | -0.001 | 0.019  | -0.020 | -0.024 | -0.013 | -0.015 | 0.078  | 0.073  | 0.042  | 0.782  | -0.008 | 0.018  | 0.019  | 0.081  | -0.077 |
| MSPD7e  | 0.015  | -0.002 | -0.004 | -0.021 | 0.057  | -0.005 | -0.006 | 0.013  | 0.007  | 0.036  | 0.008  | 0.045  | 0.730  | 0.073  | 0.013  | 0.031  | 0.010  | 0.220  |
| MSPD8a  | 0.118  | 0.565  | 0.001  | -0.022 | 0.087  | 0.009  | -0.014 | 0.100  | -0.031 | 0.048  | 0.005  | 0.053  | -0.046 | 0.035  | -0.058 | -0.065 | 0.021  | -0.046 |
| MSPD8b  | 0.108  | 0.125  | 0.000  | -0.012 | 0.436  | -0.031 | 0.009  | 0.435  | 0.011  | 0.008  | -0.024 | -0.022 | 0.035  | -0.018 | 0.028  | -0.064 | 0.025  | 0.003  |
| MSPD8c  | 0.008  | -0.035 | 0.005  | -0.004 | 0.940  | 0.010  | 0.006  | -0.000 | -0.013 | -0.018 | -0.008 | 0.015  | 0.026  | 0.019  | -0.002 | 0.032  | -0.032 | -0.061 |
| MSPD8d  | -0.001 | 0.006  | -0.005 | 0.015  | 0.957  | 0.004  | -0.020 | -0.025 | -0.007 | 0.024  | 0.023  | 0.013  | -0.009 | -0.018 | -0.015 | 0.016  | 0.038  | -0.049 |
| MSPD8e  | -0.014 | 0.002  | -0.005 | 0.001  | 0.908  | -0.005 | 0.001  | -0.009 | 0.011  | 0.006  | 0.019  | 0.029  | 0.004  | 0.015  | 0.027  | -0.015 | 0.008  | 0.128  |
| MSPD9a  | 0.101  | 0.568  | -0.053 | 0.053  | -0.071 | 0.013  | -0.040 | 0.094  | 0.001  | 0.008  | -0.088 | 0.293  | -0.058 | 0.074  | -0.077 | -0.076 | 0.024  | 0.037  |
| MSPD9b  | 0.110  | 0.053  | 0.016  | -0.003 | 0.025  | 0.023  | 0.006  | 0.493  | 0.038  | 0.017  | -0.016 | 0.382  | -0.001 | 0.039  | 0.033  | -0.021 | 0.030  | 0.012  |
| MSPD9c  | -0.003 | -0.034 | 0.009  | -0.001 | 0.094  | 0.004  | 0.014  | 0.012  | -0.006 | 0.030  | 0.039  | 0.749  | 0.097  | 0.054  | 0.045  | 0.063  | -0.001 | -0.082 |
| MSPD9d  | 0.019  | -0.001 | -0.003 | 0.002  | 0.080  | 0.002  | -0.034 | -0.025 | -0.001 | 0.060  | 0.076  | 0.757  | 0.075  | -0.034 | 0.010  | 0.074  | 0.086  | -0.042 |
| MSPD9e  | 0.031  | -0.016 | 0.008  | 0.019  | 0.072  | -0.008 | 0.012  | -0.020 | 0.031  | 0.045  | 0.072  | 0.683  | 0.090  | 0.041  | 0.044  | 0.057  | 0.014  | 0.195  |
| MSPD10a | 0.828  | 0.039  | 0.004  | -0.018 | -0.004 | 0.014  | -0.013 | -0.001 | -0.030 | 0.020  | 0.015  | 0.043  | 0.016  | 0.028  | -0.015 | -0.031 | 0.047  | -0.044 |
| MSPD10b | 0.864  | 0.020  | -0.045 | 0.044  | -0.008 | 0.001  | -0.033 | 0.008  | -0.030 | -0.004 | -0.008 | 0.067  | 0.010  | 0.035  | -0.012 | -0.007 | 0.003  | -0.030 |
| MSPD10c | 0.773  | -0.016 | -0.049 | 0.034  | -0.010 | -0.010 | -0.027 | 0.001  | 0.045  | 0.003  | -0.006 | -0.005 | 0.028  | -0.014 | -0.040 | 0.012  | 0.009  | 0.014  |
| MSPD10d | 0.774  | -0.047 | -0.052 | 0.060  | -0.033 | -0.033 | 0.021  | 0.043  | 0.037  | 0.002  | 0.024  | -0.037 | -0.002 | -0.055 | 0.095  | 0.031  | -0.038 | 0.020  |
| MSPD10e | 0.662  | -0.014 | -0.001 | 0.016  | -0.005 | -0.011 | 0.043  | 0.013  | 0.038  | 0.030  | 0.028  | -0.016 | -0.000 | -0.068 | 0.040  | 0.031  | -0.019 | 0.002  |
| MSPD10f | 0.849  | 0.051  | 0.040  | -0.048 | 0.023  | -0.012 | 0.002  | -0.065 | 0.008  | -0.007 | 0.023  | -0.040 | -0.022 | 0.021  | -0.019 | 0.049  | -0.012 | 0.002  |
| MSPD10g | 0.716  | -0.036 | -0.021 | 0.021  | -0.069 | 0.028  | -0.020 | 0.038  | 0.005  | 0.042  | 0.011  | -0.074 | -0.011 | -0.064 | 0.007  | 0.069  | -0.032 | 0.060  |
| MSPD10h | 0.758  | 0.004  | 0.018  | -0.091 | 0.064  | 0.050  | 0.013  | 0.007  | -0.033 | 0.004  | -0.034 | 0.041  | -0.037 | 0.034  | 0.031  | -0.028 | 0.059  | -0.003 |
| MSPD10i | 0.794  | -0.020 | 0.018  | -0.030 | 0.019  | -0.006 | 0.023  | 0.011  | 0.023  | -0.001 | -0.006 | 0.037  | 0.037  | 0.048  | 0.025  | -0.017 | -0.008 | -0.007 |
| MSPD10j | 0.739  | 0.025  | 0.113  | -0.078 | 0.055  | 0.012  | 0.016  | -0.020 | 0.005  | -0.010 | 0.013  | -0.030 | 0.052  | 0.015  | -0.008 | -0.029 | -0.001 | 0.014  |

Table SF63: EFA for Total Sample (Excluding Supplementary Items): 18 Factors Using Oblimin Rotation.

In Table SF64, we listed the items of each factor that exceeded the threshold of 0.40. In Factor 18, we did not have any loading exceeding this threshold.

| Factor | Items                                                                                    |
|--------|------------------------------------------------------------------------------------------|
| F1     | MSPD10a, MSPD10b, MSPD10c, MSPD10d, MSPD10e, MSPD10f, MSPD10g, MSPD10h, MSPD10i, MSPD10j |
| F2     | MSPD1a, MSPD2a, MSPD3a, MSPD4a, MSPD5a, MSPD6a, MSPD7a, MSPD8a, MSPD9a                   |
| F3     | MIQ4, MIQ5, SOQ1c, SOQ2c, SOQ3c                                                          |
| F4     | MIQ1, TCS1, TCS2, TCS3, TCS4, TCS5                                                       |
| F5     | MSPD8c, MSPD8d, MSPD8e                                                                   |
| F6     | SOQ3a, SOQ3b, SOQ3d, SOQ3e                                                               |
| F7     | SOQ2b, SOQ2d, SOQ2e                                                                      |
| F8     | MSPD1b, MSPD2b, MSPD3b, MSPD5b, MSPD7b                                                   |
| F9     | SOQ1b, SOQ1d, SOQ1e                                                                      |
| F10    | MSPD6c, MSPD6d, MSPD6e                                                                   |
| F11    | MSPD1c, MSPD1d, MSPD1e                                                                   |
| F12    | MSPD9c, MSPD9d, MSPD9e                                                                   |
| F13    | MSPD7c, MSPD7d, MSPD7e                                                                   |
| F14    | MSPD2c, MSPD2d, MSPD2e                                                                   |
| F15    | MSPD4c, MSPD4d, MSPD4e                                                                   |
| F16    | MSPD5c, MSPD5d, MSPD5e                                                                   |
| F17    | MSPD3c, MSPD3d, MSPD3e                                                                   |
| F18    | -                                                                                        |

Table SF64: Factor Structure and Items: 18 Factors (Oblimin Rotation).

| Factors | Eigenvalues | VAR    | CUM    |
|---------|-------------|--------|--------|
| 1       | 6.3678      | 0.0630 | 0.0630 |
| 2       | 4.5773      | 0.0453 | 0.1084 |
| 3       | 4.4264      | 0.0438 | 0.1522 |
| 4       | 4.3040      | 0.0426 | 0.1948 |
| 5       | 3.0421      | 0.0301 | 0.2249 |
| 6       | 2.8470      | 0.0282 | 0.2531 |
| 7       | 2.8129      | 0.0279 | 0.2810 |
| 8       | 2.6964      | 0.0267 | 0.3077 |
| 9       | 2.4246      | 0.0240 | 0.3317 |
| 10      | 2.2447      | 0.0222 | 0.3539 |
| 11      | 2.2215      | 0.0220 | 0.3759 |
| 12      | 2.1810      | 0.0216 | 0.3975 |
| 13      | 2.1576      | 0.0214 | 0.4188 |
| 14      | 2.0860      | 0.0207 | 0.4395 |
| 15      | 2.0792      | 0.0206 | 0.4601 |
| 16      | 1.7755      | 0.0176 | 0.4777 |
| 17      | 0.6984      | 0.0069 | 0.4846 |

Table SF65: Factors, Eigenvalues, Variance Explained, and Cumulative Variance for 17 Factors (Oblimin Rotation).

| Items         | F1     | F2     | F3     | F4     | F5     | F6     | F7     | F8     | F9     | F10    | F11    | F12    | F13    | F14    | F15    | F16    | F17    |
|---------------|--------|--------|--------|--------|--------|--------|--------|--------|--------|--------|--------|--------|--------|--------|--------|--------|--------|
| <b>MIQ1</b>   | -0.054 | -0.063 | 0.589  | -0.001 | 0.012  | -0.003 | -0.014 | -0.045 | 0.164  | 0.078  | 0.020  | 0.005  | 0.006  | -0.021 | -0.030 | -0.023 | -0.012 |
| <b>MIQ3</b>   | 0.124  | -0.061 | 0.095  | 0.396  | 0.001  | 0.000  | 0.042  | 0.000  | 0.133  | -0.043 | -0.009 | -0.153 | -0.124 | -0.068 | -0.042 | -0.003 | 0.102  |
| <b>MIQ4</b>   | -0.100 | 0.033  | 0.047  | -0.355 | 0.022  | 0.029  | 0.030  | -0.027 | -0.068 | 0.039  | 0.036  | 0.249  | 0.143  | 0.048  | 0.044  | -0.025 | -0.118 |
| <b>MIQ5</b>   | -0.102 | 0.117  | -0.037 | -0.517 | 0.016  | -0.013 | -0.084 | -0.021 | 0.080  | 0.031  | 0.021  | 0.199  | 0.150  | -0.001 | 0.011  | 0.045  | -0.049 |
| <b>MIQ6</b>   | 0.054  | -0.036 | -0.413 | 0.017  | -0.011 | -0.004 | 0.063  | -0.050 | 0.212  | -0.023 | 0.003  | 0.163  | -0.032 | -0.020 | -0.032 | 0.035  | 0.019  |
| <b>MIQ7</b>   | 0.053  | -0.084 | -0.426 | -0.003 | 0.008  | 0.056  | 0.078  | -0.073 | 0.262  | 0.003  | 0.026  | 0.139  | -0.027 | 0.021  | -0.022 | -0.048 | -0.004 |
| <b>MIQ9</b>   | 0.028  | -0.012 | -0.532 | 0.064  | 0.045  | 0.037  | -0.019 | 0.052  | 0.169  | 0.075  | 0.028  | 0.208  | 0.002  | 0.122  | -0.031 | -0.096 | -0.006 |
| <b>MIQ10</b>  | 0.081  | -0.009 | -0.472 | 0.008  | 0.023  | 0.017  | -0.042 | 0.053  | 0.165  | 0.087  | 0.022  | 0.196  | 0.071  | 0.119  | -0.024 | -0.081 | -0.027 |
| <b>TCS1</b>   | -0.008 | 0.026  | 0.702  | 0.032  | 0.026  | -0.008 | -0.045 | -0.080 | -0.124 | -0.013 | -0.037 | 0.122  | -0.007 | 0.026  | -0.047 | -0.011 | -0.017 |
| <b>TCS2</b>   | -0.004 | -0.010 | 0.815  | -0.013 | -0.010 | -0.006 | -0.002 | -0.053 | -0.064 | -0.038 | -0.022 | 0.049  | 0.004  | -0.023 | -0.027 | -0.021 | 0.021  |
| <b>TCS3</b>   | -0.037 | 0.020  | 0.798  | 0.028  | -0.013 | 0.000  | 0.016  | -0.033 | -0.087 | -0.043 | -0.018 | -0.017 | -0.004 | -0.035 | 0.003  | 0.011  | 0.018  |
| <b>TCS4</b>   | -0.040 | 0.003  | 0.795  | 0.001  | 0.025  | 0.000  | 0.013  | 0.042  | 0.131  | 0.030  | 0.010  | -0.025 | -0.035 | 0.005  | -0.017 | -0.031 | 0.007  |
| <b>TCS5</b>   | 0.026  | -0.050 | 0.720  | 0.013  | -0.009 | 0.011  | -0.029 | 0.077  | 0.073  | 0.126  | 0.027  | 0.027  | -0.050 | 0.059  | 0.010  | -0.045 | -0.056 |
| <b>OSRI1</b>  | 0.055  | 0.098  | -0.020 | -0.013 | 0.002  | -0.032 | -0.023 | -0.095 | 0.042  | 0.012  | -0.027 | 0.364  | 0.038  | -0.035 | 0.057  | 0.019  | -0.006 |
| <b>OSRI2</b>  | 0.112  | -0.044 | 0.118  | 0.197  | -0.045 | 0.010  | 0.032  | -0.009 | 0.160  | 0.049  | 0.068  | 0.202  | -0.056 | 0.057  | -0.068 | -0.022 | 0.081  |
| <b>OSRI3</b>  | 0.027  | -0.039 | -0.152 | 0.117  | 0.024  | 0.040  | 0.089  | 0.122  | 0.024  | 0.067  | -0.037 | 0.203  | -0.034 | 0.092  | 0.059  | 0.012  | -0.058 |
| <b>OSRI4</b>  | 0.092  | -0.002 | 0.003  | 0.104  | 0.021  | 0.053  | 0.044  | 0.034  | 0.028  | -0.007 | 0.015  | 0.140  | -0.057 | -0.016 | 0.038  | -0.052 | 0.028  |
| <b>OSRI5</b>  | -0.087 | 0.078  | 0.038  | -0.097 | -0.011 | -0.084 | -0.123 | 0.020  | -0.141 | -0.026 | 0.037  | 0.180  | 0.027  | -0.066 | -0.002 | -0.033 | -0.014 |
| <b>OSRI6</b>  | 0.013  | 0.066  | -0.009 | -0.078 | 0.055  | -0.073 | 0.052  | -0.037 | 0.045  | 0.018  | 0.017  | 0.435  | 0.013  | -0.018 | -0.002 | 0.003  | 0.009  |
| <b>OSRI7</b>  | 0.153  | -0.117 | 0.115  | 0.250  | -0.020 | -0.023 | 0.040  | -0.072 | 0.069  | -0.030 | -0.013 | 0.165  | -0.053 | 0.076  | -0.023 | -0.016 | 0.082  |
| <b>OSRI8</b>  | 0.056  | 0.001  | -0.003 | -0.075 | 0.043  | -0.122 | 0.000  | -0.026 | -0.093 | -0.036 | -0.039 | 0.436  | -0.044 | -0.088 | 0.032  | 0.014  | -0.045 |
| <b>OSRI9</b>  | 0.111  | -0.021 | -0.112 | 0.159  | 0.017  | 0.018  | 0.069  | 0.063  | 0.084  | 0.038  | -0.039 | 0.240  | -0.104 | 0.008  | 0.014  | 0.004  | 0.084  |
| <b>OSRI10</b> | -0.024 | 0.089  | -0.112 | 0.078  | -0.022 | 0.003  | 0.057  | 0.029  | -0.075 | 0.012  | -0.044 | 0.421  | 0.038  | -0.033 | -0.001 | 0.003  | 0.009  |
| <b>OSRI11</b> | 0.093  | 0.029  | -0.019 | 0.207  | 0.036  | 0.010  | 0.055  | 0.087  | 0.141  | -0.010 | -0.033 | 0.282  | -0.067 | 0.037  | -0.033 | -0.008 | 0.084  |
| <b>OSRI12</b> | 0.075  | -0.107 | 0.050  | 0.275  | 0.051  | 0.016  | 0.073  | -0.024 | 0.091  | -0.102 | 0.087  | 0.250  | -0.096 | 0.026  | 0.006  | -0.027 | 0.093  |
| <b>OSRI13</b> | -0.001 | 0.073  | 0.046  | -0.139 | -0.051 | -0.011 | -0.053 | -0.063 | 0.029  | -0.028 | 0.082  | 0.493  | 0.032  | -0.037 | 0.059  | 0.010  | -0.001 |
| <b>OSRI14</b> | 0.106  | -0.005 | 0.176  | 0.201  | 0.001  | -0.015 | 0.029  | -0.058 | 0.067  | -0.056 | 0.060  | 0.216  | -0.063 | -0.023 | 0.017  | -0.030 | 0.069  |
| <b>OSRI15</b> | 0.043  | 0.142  | -0.004 | -0.093 | -0.051 | -0.029 | -0.022 | -0.028 | 0.035  | -0.018 | 0.020  | 0.445  | -0.018 | -0.052 | 0.016  | 0.069  | 0.006  |
| <b>OSRI16</b> | 0.136  | -0.031 | 0.175  | 0.276  | 0.024  | 0.000  | 0.021  | -0.038 | 0.138  | -0.100 | 0.005  | 0.135  | -0.108 | 0.022  | -0.012 | 0.019  | 0.101  |
| <b>OSRI17</b> | -0.013 | 0.074  | 0.019  | -0.049 | -0.030 | -0.026 | 0.024  | 0.017  | -0.082 | 0.012  | -0.006 | 0.417  | -0.030 | -0.010 | 0.003  | -0.017 | 0.025  |
| <b>OSRI18</b> | 0.096  | -0.059 | 0.031  | 0.184  | 0.011  | 0.031  | 0.070  | 0.001  | 0.213  | -0.032 | 0.060  | 0.194  | -0.069 | 0.084  | -0.029 | -0.055 | 0.112  |
| <b>SOQ1a</b>  | -0.016 | -0.007 | 0.042  | 0.824  | 0.020  | -0.002 | -0.007 | -0.011 | -0.067 | -0.012 | 0.012  | 0.008  | 0.351  | 0.004  | 0.031  | 0.009  | -0.024 |
| <b>SOQ1b</b>  | 0.018  | 0.002  | -0.036 | 0.068  | 0.013  | 0.003  | 0.025  | 0.030  | 0.013  | 0.004  | -0.005 | 0.018  | 0.944  | -0.003 | -0.006 | 0.011  | 0.000  |
| <b>SOQ1c</b>  | -0.026 | 0.019  | 0.103  | -0.640 | -0.003 | -0.008 | -0.011 | 0.165  | -0.049 | -0.048 | 0.001  | 0.127  | 0.358  | -0.010 | 0.050  | 0.002  | -0.015 |

| Items  | F1     | F2     | F3     | F4     | F5     | F6     | F7     | F8     | F9     | F10    | F11    | F12    | F13    | F14    | F15    | F16    | F17    |
|--------|--------|--------|--------|--------|--------|--------|--------|--------|--------|--------|--------|--------|--------|--------|--------|--------|--------|
| SOQ1d  | 0.043  | 0.003  | -0.039 | -0.026 | -0.032 | 0.021  | -0.042 | 0.273  | 0.088  | -0.005 | 0.034  | -0.028 | 0.632  | -0.002 | 0.001  | -0.023 | 0.006  |
| SOQ1e  | 0.030  | -0.043 | -0.060 | -0.053 | -0.014 | 0.049  | 0.003  | 0.136  | 0.238  | 0.046  | 0.005  | -0.041 | 0.587  | 0.044  | -0.024 | -0.024 | 0.015  |
| SOQ2a  | 0.032  | -0.008 | 0.063  | 0.799  | 0.013  | -0.019 | -0.015 | -0.048 | 0.199  | -0.003 | 0.007  | -0.041 | 0.013  | 0.008  | 0.041  | -0.011 | 0.010  |
| SOQ2b  | 0.038  | 0.021  | -0.027 | 0.133  | 0.044  | 0.012  | 0.019  | -0.037 | 0.677  | -0.018 | 0.038  | 0.080  | 0.196  | -0.008 | 0.027  | 0.010  | -0.014 |
| SOQ2c  | 0.005  | 0.091  | 0.066  | -0.679 | 0.022  | -0.003 | -0.014 | 0.102  | 0.295  | -0.012 | -0.032 | 0.088  | 0.003  | -0.024 | 0.037  | 0.062  | -0.029 |
| SOQ2d  | 0.020  | 0.025  | -0.068 | -0.088 | -0.013 | 0.008  | 0.001  | 0.112  | 0.758  | -0.010 | 0.048  | -0.020 | 0.024  | 0.036  | 0.043  | 0.016  | 0.023  |
| SOQ2e  | 0.033  | -0.032 | -0.082 | -0.056 | 0.007  | 0.047  | 0.047  | 0.042  | 0.799  | 0.036  | 0.014  | -0.013 | 0.009  | 0.025  | 0.016  | 0.022  | -0.006 |
| SOQ3a  | -0.027 | 0.003  | 0.010  | 0.828  | 0.009  | 0.024  | -0.005 | 0.407  | -0.076 | -0.007 | 0.006  | -0.005 | 0.005  | 0.003  | 0.043  | 0.021  | -0.027 |
| SOQ3b  | 0.011  | 0.007  | -0.040 | 0.130  | 0.032  | -0.012 | 0.035  | 0.753  | -0.005 | -0.002 | 0.001  | 0.013  | 0.235  | 0.008  | 0.007  | 0.034  | -0.008 |
| SOQ3c  | -0.017 | 0.019  | 0.097  | -0.560 | 0.014  | -0.019 | -0.006 | 0.603  | -0.088 | -0.031 | -0.020 | 0.130  | 0.037  | -0.008 | 0.034  | 0.022  | -0.018 |
| SOQ3d  | 0.017  | 0.022  | -0.052 | 0.056  | 0.012  | 0.012  | -0.012 | 0.906  | 0.054  | -0.008 | 0.030  | -0.026 | 0.045  | -0.004 | -0.006 | 0.001  | 0.002  |
| SOQ3e  | 0.031  | -0.027 | -0.068 | 0.011  | -0.008 | 0.027  | 0.020  | 0.722  | 0.180  | 0.060  | -0.020 | -0.035 | 0.099  | 0.030  | -0.007 | -0.007 | 0.005  |
| MSPD1a | 0.028  | 0.695  | -0.031 | -0.005 | -0.020 | 0.017  | -0.029 | -0.008 | -0.003 | -0.019 | -0.061 | 0.103  | -0.008 | 0.013  | 0.012  | 0.021  | -0.025 |
| MSPD1b | 0.010  | 0.005  | -0.091 | 0.037  | 0.006  | 0.147  | 0.527  | -0.004 | 0.093  | -0.003 | -0.025 | 0.068  | 0.024  | -0.003 | 0.087  | 0.015  | 0.014  |
| MSPD1c | 0.009  | -0.039 | -0.004 | 0.032  | 0.094  | 0.406  | 0.100  | 0.008  | 0.065  | 0.123  | -0.068 | 0.071  | -0.030 | 0.054  | 0.176  | 0.149  | -0.120 |
| MSPD1d | 0.004  | 0.021  | 0.012  | 0.029  | 0.107  | 0.453  | 0.037  | -0.016 | 0.004  | 0.040  | -0.027 | 0.024  | -0.021 | -0.074 | 0.213  | 0.212  | -0.096 |
| MSPD1e | 0.009  | 0.034  | -0.013 | 0.011  | 0.076  | 0.426  | 0.056  | 0.009  | 0.037  | 0.068  | -0.007 | 0.067  | -0.013 | -0.026 | 0.175  | 0.157  | 0.175  |
| MSPD2a | -0.006 | 0.783  | -0.023 | 0.008  | 0.024  | 0.058  | -0.067 | -0.015 | 0.003  | 0.000  | -0.024 | -0.001 | 0.041  | -0.095 | 0.020  | -0.002 | 0.010  |
| MSPD2b | 0.035  | -0.059 | -0.046 | 0.008  | 0.026  | 0.259  | 0.610  | 0.005  | 0.050  | 0.010  | 0.027  | 0.034  | 0.003  | 0.047  | 0.080  | -0.007 | -0.043 |
| MSPD2c | 0.022  | -0.043 | -0.016 | 0.008  | 0.022  | 0.738  | 0.054  | 0.014  | 0.035  | 0.042  | 0.070  | 0.011  | 0.002  | 0.132  | 0.016  | 0.008  | -0.081 |
| MSPD2d | 0.043  | 0.011  | -0.013 | -0.004 | 0.028  | 0.784  | 0.011  | -0.007 | -0.009 | -0.005 | 0.060  | -0.058 | 0.018  | 0.065  | 0.061  | 0.064  | -0.072 |
| MSPD2e | 0.031  | 0.010  | -0.011 | -0.027 | 0.028  | 0.736  | 0.015  | 0.009  | 0.012  | 0.052  | 0.087  | -0.033 | 0.027  | 0.050  | 0.037  | 0.017  | 0.211  |
| MSPD3a | -0.002 | 0.792  | 0.032  | -0.018 | -0.012 | -0.010 | -0.012 | -0.025 | 0.035  | -0.079 | -0.060 | -0.028 | -0.003 | -0.037 | 0.061  | 0.024  | 0.035  |
| MSPD3b | 0.041  | -0.049 | 0.044  | -0.011 | -0.012 | 0.173  | 0.595  | -0.004 | 0.012  | 0.068  | 0.053  | 0.047  | 0.015  | 0.099  | 0.044  | 0.107  | -0.041 |
| MSPD3c | -0.017 | -0.088 | 0.007  | -0.004 | 0.081  | 0.332  | 0.072  | -0.019 | 0.040  | 0.049  | 0.135  | 0.074  | 0.011  | 0.269  | 0.051  | 0.152  | -0.026 |
| MSPD3d | 0.025  | -0.031 | 0.010  | -0.013 | 0.089  | 0.347  | -0.029 | -0.026 | 0.022  | -0.008 | 0.171  | 0.026  | -0.003 | 0.189  | 0.082  | 0.215  | 0.004  |
| MSPD3e | 0.012  | -0.038 | 0.000  | -0.007 | 0.063  | 0.298  | -0.006 | -0.013 | 0.010  | 0.081  | 0.157  | 0.050  | 0.019  | 0.195  | 0.080  | 0.162  | 0.298  |
| MSPD4a | -0.022 | 0.759  | 0.026  | -0.002 | 0.005  | -0.057 | 0.007  | 0.001  | 0.007  | -0.054 | -0.079 | 0.003  | 0.009  | 0.149  | 0.010  | 0.012  | 0.043  |
| MSPD4b | 0.080  | 0.052  | -0.029 | 0.017  | 0.022  | -0.032 | 0.498  | -0.005 | 0.088  | 0.042  | 0.030  | -0.031 | 0.009  | 0.416  | 0.037  | 0.004  | -0.016 |
| MSPD4c | 0.041  | 0.002  | -0.013 | 0.004  | 0.052  | 0.086  | 0.030  | 0.011  | 0.007  | 0.039  | 0.073  | -0.014 | -0.004 | 0.737  | 0.053  | 0.057  | -0.063 |
| MSPD4d | 0.042  | 0.019  | -0.029 | 0.001  | 0.045  | 0.082  | -0.015 | 0.002  | -0.015 | 0.039  | 0.071  | -0.008 | -0.010 | 0.752  | 0.075  | 0.068  | -0.045 |
| MSPD4e | 0.039  | 0.000  | -0.028 | -0.026 | 0.031  | 0.093  | -0.006 | -0.015 | 0.024  | 0.023  | 0.073  | -0.031 | 0.032  | 0.627  | 0.088  | 0.091  | 0.238  |
| MSPD5a | -0.042 | 0.759  | -0.024 | 0.004  | -0.019 | -0.011 | 0.057  | 0.033  | -0.011 | 0.059  | -0.022 | 0.037  | -0.066 | 0.091  | -0.041 | 0.104  | -0.064 |
| MSPD5b | 0.009  | -0.035 | -0.004 | 0.019  | 0.062  | -0.010 | 0.379  | -0.001 | -0.014 | -0.027 | 0.072  | 0.032  | 0.028  | 0.022  | 0.015  | 0.024  | -0.016 |
| MSPD5c | -0.019 | -0.073 | -0.022 | 0.009  | 0.087  | 0.263  | 0.118  | -0.018 | -0.022 | -0.055 | -0.084 | 0.060  | -0.040 | 0.223  | 0.085  | 0.042  | -0.060 |

| Items   | F1     | F2     | F3     | F4     | F5     | F6     | F7     | F8     | F9     | F10    | F11    | F12    | F13    | F14    | F15    | F16    | F17    |
|---------|--------|--------|--------|--------|--------|--------|--------|--------|--------|--------|--------|--------|--------|--------|--------|--------|--------|
| MSPD5d  | 0.039  | 0.022  | -0.030 | 0.022  | 0.022  | 0.193  | -0.035 | -0.016 | -0.007 | -0.030 | -0.092 | 0.032  | 0.028  | 0.261  | 0.049  | 0.017  | -0.073 |
| MSPD5e  | 0.037  | -0.011 | -0.005 | 0.031  | 0.062  | 0.264  | -0.033 | -0.027 | 0.033  | -0.026 | -0.071 | 0.031  | -0.026 | 0.236  | 0.089  | 0.015  | -0.108 |
| MSPD6a  | 0.015  | 0.746  | -0.012 | -0.017 | 0.028  | -0.062 | -0.005 | 0.016  | -0.019 | -0.104 | 0.166  | -0.031 | 0.010  | -0.048 | -0.014 | -0.104 | 0.030  |
| MSPD6b  | 0.060  | 0.057  | -0.033 | -0.016 | 0.013  | -0.023 | 0.572  | -0.013 | -0.011 | 0.010  | 0.444  | -0.027 | 0.023  | 0.024  | 0.006  | -0.039 | -0.048 |
| MSPD6c  | 0.011  | -0.046 | -0.010 | 0.021  | 0.034  | 0.045  | 0.040  | 0.006  | 0.038  | 0.050  | 0.754  | 0.019  | -0.018 | 0.105  | 0.054  | 0.048  | -0.095 |
| MSPD6d  | 0.033  | -0.006 | -0.002 | -0.004 | 0.041  | 0.066  | -0.027 | -0.012 | 0.013  | 0.024  | 0.794  | -0.023 | 0.003  | 0.045  | 0.075  | 0.075  | -0.073 |
| MSPD6e  | 0.024  | -0.011 | -0.023 | 0.002  | 0.033  | 0.047  | 0.003  | 0.024  | 0.007  | 0.052  | 0.749  | 0.029  | 0.011  | 0.010  | 0.074  | 0.056  | 0.214  |
| MSPD7a  | 0.110  | 0.560  | -0.005 | 0.011  | -0.022 | 0.024  | 0.038  | 0.006  | 0.045  | 0.096  | 0.020  | 0.056  | 0.024  | 0.049  | -0.045 | -0.001 | -0.101 |
| MSPD7b  | 0.031  | 0.068  | -0.054 | -0.033 | 0.082  | -0.063 | 0.504  | 0.020  | 0.034  | -0.090 | -0.012 | -0.051 | -0.034 | 0.012  | 0.336  | -0.025 | 0.046  |
| MSPD7c  | 0.036  | -0.046 | -0.034 | 0.023  | 0.027  | 0.033  | 0.036  | 0.007  | 0.052  | 0.128  | 0.029  | 0.040  | -0.025 | 0.082  | 0.712  | 0.018  | -0.106 |
| MSPD7d  | 0.031  | 0.020  | 0.008  | 0.024  | 0.032  | 0.038  | -0.015 | -0.024 | 0.003  | 0.041  | 0.089  | -0.014 | -0.011 | 0.032  | 0.810  | 0.038  | -0.080 |
| MSPD7e  | 0.018  | -0.002 | -0.030 | 0.004  | 0.055  | 0.048  | 0.020  | 0.004  | -0.017 | 0.068  | 0.051  | 0.012  | 0.010  | 0.028  | 0.724  | 0.003  | 0.233  |
| MSPD8a  | 0.117  | 0.546  | -0.022 | 0.018  | 0.088  | 0.055  | 0.104  | 0.015  | -0.030 | 0.053  | 0.054  | 0.071  | -0.040 | -0.055 | -0.055 | -0.064 | -0.046 |
| MSPD8b  | 0.105  | 0.120  | -0.008 | -0.004 | 0.439  | -0.041 | 0.442  | -0.030 | 0.006  | -0.028 | 0.010  | 0.005  | 0.008  | 0.028  | 0.026  | -0.072 | 0.008  |
| MSPD8c  | 0.008  | -0.035 | -0.008 | -0.001 | 0.944  | -0.022 | 0.003  | 0.014  | 0.003  | 0.023  | -0.019 | 0.010  | -0.013 | -0.000 | 0.014  | 0.017  | -0.057 |
| MSPD8d  | 0.002  | 0.009  | 0.020  | 0.005  | 0.975  | 0.001  | -0.031 | 0.000  | -0.011 | 0.004  | 0.024  | -0.005 | -0.006 | -0.014 | -0.005 | 0.029  | -0.054 |
| MSPD8e  | -0.014 | 0.011  | -0.000 | -0.006 | 0.920  | 0.028  | -0.011 | -0.006 | 0.002  | 0.032  | 0.003  | -0.023 | 0.016  | 0.024  | 0.002  | -0.025 | 0.126  |
| MSPD9a  | 0.106  | 0.562  | 0.056  | 0.039  | -0.078 | 0.034  | 0.087  | 0.011  | -0.040 | 0.302  | 0.022  | -0.020 | 0.001  | -0.067 | -0.081 | -0.096 | 0.035  |
| MSPD9b  | 0.109  | 0.046  | 0.002  | -0.024 | 0.020  | 0.011  | 0.502  | 0.022  | 0.005  | 0.395  | 0.022  | -0.010 | 0.037  | 0.032  | -0.018 | -0.038 | 0.011  |
| MSPD9c  | -0.003 | -0.041 | -0.004 | -0.001 | 0.088  | 0.023  | 0.018  | 0.006  | 0.010  | 0.788  | 0.032  | 0.019  | -0.010 | 0.047  | 0.087  | 0.051  | -0.083 |
| MSPD9d  | 0.023  | 0.002  | 0.013  | -0.004 | 0.089  | 0.013  | -0.030 | -0.005 | -0.015 | 0.772  | 0.063  | -0.021 | -0.002 | 0.009  | 0.087  | 0.101  | -0.049 |
| MSPD9e  | 0.029  | -0.015 | 0.015  | -0.015 | 0.071  | 0.051  | -0.015 | -0.006 | 0.007  | 0.719  | 0.042  | -0.007 | 0.031  | 0.039  | 0.092  | 0.051  | 0.197  |
| MSPD10a | 0.832  | 0.038  | -0.016 | -0.009 | 0.000  | 0.059  | -0.004 | 0.014  | -0.010 | 0.040  | 0.026  | 0.004  | -0.032 | -0.011 | 0.016  | -0.024 | -0.049 |
| MSPD10b | 0.870  | 0.027  | 0.045  | 0.031  | -0.006 | 0.032  | 0.003  | -0.002 | -0.021 | 0.066  | -0.003 | -0.031 | -0.028 | -0.012 | 0.006  | -0.010 | -0.036 |
| MSPD10c | 0.781  | 0.006  | 0.041  | 0.022  | -0.005 | -0.012 | -0.010 | -0.020 | 0.004  | -0.011 | 0.001  | -0.082 | 0.055  | -0.044 | 0.035  | 0.015  | 0.009  |
| MSPD10d | 0.776  | -0.033 | 0.059  | 0.036  | -0.030 | -0.074 | 0.046  | -0.039 | 0.037  | -0.037 | -0.014 | -0.044 | 0.046  | 0.088  | 0.010  | 0.031  | 0.024  |
| MSPD10e | 0.661  | -0.010 | 0.014  | 0.001  | -0.003 | -0.082 | 0.017  | -0.016 | 0.046  | -0.014 | 0.021  | 0.005  | 0.044  | 0.036  | 0.013  | 0.040  | 0.008  |
| MSPD10f | 0.847  | 0.044  | -0.054 | -0.030 | 0.022  | 0.025  | -0.060 | -0.006 | -0.008 | -0.038 | -0.009 | 0.046  | 0.004  | -0.020 | -0.021 | 0.052  | 0.003  |
| MSPD10g | 0.717  | -0.025 | 0.021  | 0.009  | -0.068 | -0.069 | 0.039  | 0.025  | -0.011 | -0.077 | 0.031  | -0.031 | 0.012  | -0.005 | -0.001 | 0.068  | 0.062  |
| MSPD10h | 0.756  | -0.009 | -0.094 | -0.009 | 0.062  | 0.039  | 0.008  | 0.055  | -0.008 | 0.039  | 0.016  | 0.052  | -0.038 | 0.043  | -0.053 | -0.030 | -0.001 |
| MSPD10i | 0.792  | -0.027 | -0.037 | -0.012 | 0.015  | 0.031  | 0.017  | 0.000  | 0.009  | 0.044  | 0.001  | 0.037  | 0.019  | 0.029  | 0.029  | -0.030 | -0.004 |
| MSPD10j | 0.735  | 0.013  | -0.083 | -0.096 | 0.054  | 0.022  | -0.014 | 0.020  | -0.003 | -0.029 | -0.010 | 0.070  | 0.003  | -0.009 | 0.048  | -0.029 | 0.016  |

Table SF66: EFA for Total Sample (Excluding Supplementary Items): 17 Factors Using Oblimin Rotation.

In Table SF67, we listed the items of each factor that exceeded the threshold of 0.40. In Factor 16 and 17, we did not have any loading exceeding this threshold.

| Factor | Items                                                                                    |
|--------|------------------------------------------------------------------------------------------|
| F1     | MSPD10a, MSPD10b, MSPD10c, MSPD10d, MSPD10e, MSPD10f, MSPD10g, MSPD10h, MSPD10i, MSPD10j |
| F2     | MSPD1a, MSPD2a, MSPD3a, MSPD4a, MSPD5a, MSPD6a, MSPD7a, MSPD8a, MSPD9a                   |
| F3     | MIQ1, TCS1, TCS2, TCS3, TCS4, TCS5                                                       |
| F4     | MIQ3, SOQ1a, SOQ2a, SOQ3a                                                                |
| F5     | MSPD8c, MSPD8d, MSPD8e                                                                   |
| F6     | MSPD2c, MSPD2d, MSPD2e                                                                   |
| F7     | MSPD1b, MSPD2b, MSPD3b, MSPD7b                                                           |
| F8     | SOQ3b, SOQ3c, SOQ3d, SOQ3e                                                               |
| F9     | SOQ2b, SOQ2d, SOQ2e                                                                      |
| F10    | MSPD9c, MSPD9d, MSPD9e                                                                   |
| F11    | MSPD6c, MSPD6d, MSPD6e                                                                   |
| F12    | OSRI6, OSRI8, OSRI10, OSRI13                                                             |
| F13    | SOQ1b, SOQ1d, SOQ1e                                                                      |
| F14    | MSPD4c, MSPD4d, MSPD4e                                                                   |
| F15    | MSPD7c, MSPD7d, MSPD7e                                                                   |
| F16    | -                                                                                        |
| F17    | -                                                                                        |

Table SF67: Factor Structure and Items: 17 Factors (Oblimin Rotation).

| Factors | Eigenvalues | VAR    | CUM    |
|---------|-------------|--------|--------|
| 1       | 6.4358      | 0.0637 | 0.0637 |
| 2       | 4.7547      | 0.0471 | 0.1108 |
| 3       | 4.6772      | 0.0463 | 0.1571 |
| 4       | 4.4165      | 0.0437 | 0.2008 |
| 5       | 3.0464      | 0.0302 | 0.2310 |
| 6       | 2.8947      | 0.0287 | 0.2597 |
| 7       | 2.7733      | 0.0275 | 0.2871 |
| 8       | 2.7298      | 0.0270 | 0.3141 |
| 9       | 2.7024      | 0.0268 | 0.3409 |
| 10      | 2.2461      | 0.0222 | 0.3631 |
| 11      | 2.2359      | 0.0221 | 0.3853 |
| 12      | 2.1310      | 0.0211 | 0.4064 |
| 13      | 2.1150      | 0.0209 | 0.4273 |
| 14      | 2.1007      | 0.0208 | 0.4481 |
| 15      | 1.7843      | 0.0177 | 0.4658 |
| 16      | 0.6854      | 0.0068 | 0.4726 |

Table SF68: Factors, Eigenvalues, Variance Explained, and Cumulative Variance for 16 Factors (Oblimin Rotation).

| Items         | F1     | F2     | F3     | F4     | F5     | F6     | F7     | F8     | F9     | F10    | F11    | F12    | F13    | F14    | F15    | F16    |
|---------------|--------|--------|--------|--------|--------|--------|--------|--------|--------|--------|--------|--------|--------|--------|--------|--------|
| <b>MIQ1</b>   | -0.053 | -0.066 | 0.004  | 0.591  | 0.010  | -0.002 | -0.012 | -0.045 | 0.166  | 0.077  | 0.022  | 0.005  | -0.030 | -0.020 | -0.021 | -0.014 |
| <b>MIQ3</b>   | 0.116  | -0.084 | -0.453 | 0.090  | -0.004 | 0.006  | 0.051  | 0.016  | 0.099  | -0.038 | -0.006 | -0.120 | -0.054 | -0.065 | -0.003 | 0.106  |
| <b>MIQ4</b>   | -0.085 | 0.077  | 0.439  | 0.059  | 0.031  | 0.021  | 0.012  | -0.050 | -0.001 | 0.029  | 0.031  | 0.148  | 0.065  | 0.043  | -0.021 | -0.132 |
| <b>MIQ5</b>   | -0.091 | 0.143  | 0.583  | -0.033 | 0.020  | -0.019 | -0.093 | -0.041 | 0.121  | 0.026  | 0.019  | 0.147  | 0.023  | -0.004 | 0.046  | -0.056 |
| <b>MIQ6</b>   | 0.065  | -0.004 | 0.022  | -0.403 | -0.002 | -0.006 | 0.050  | -0.061 | 0.267  | -0.028 | -0.001 | -0.018 | -0.022 | -0.021 | 0.039  | 0.003  |
| <b>MIQ7</b>   | 0.062  | -0.058 | 0.033  | -0.418 | 0.015  | 0.054  | 0.068  | -0.079 | 0.308  | -0.001 | 0.023  | -0.018 | -0.014 | 0.020  | -0.045 | -0.018 |
| <b>MIQ9</b>   | 0.043  | 0.033  | -0.010 | -0.515 | 0.055  | 0.031  | -0.037 | 0.038  | 0.241  | 0.064  | 0.021  | 0.023  | -0.008 | 0.118  | -0.089 | -0.031 |
| <b>MIQ10</b>  | 0.095  | 0.031  | 0.044  | -0.456 | 0.031  | 0.009  | -0.058 | 0.039  | 0.232  | 0.076  | 0.015  | 0.088  | -0.001 | 0.114  | -0.072 | -0.050 |
| <b>TCS1</b>   | 0.002  | 0.053  | 0.009  | 0.708  | 0.031  | -0.013 | -0.055 | -0.091 | -0.089 | -0.021 | -0.040 | 0.003  | -0.031 | 0.023  | -0.006 | -0.029 |
| <b>TCS2</b>   | 0.001  | -0.000 | 0.033  | 0.817  | -0.008 | -0.008 | -0.005 | -0.060 | -0.052 | -0.042 | -0.022 | 0.010  | -0.021 | -0.024 | -0.019 | 0.018  |
| <b>TCS3</b>   | -0.037 | 0.017  | -0.026 | 0.797  | -0.014 | 0.000  | 0.018  | -0.035 | -0.094 | -0.044 | -0.017 | -0.004 | 0.004  | -0.035 | 0.012  | 0.020  |
| <b>TCS4</b>   | -0.041 | -0.006 | -0.005 | 0.797  | 0.023  | 0.003  | 0.018  | 0.043  | 0.125  | 0.030  | 0.012  | -0.037 | -0.022 | 0.006  | -0.030 | 0.008  |
| <b>TCS5</b>   | 0.030  | -0.046 | 0.002  | 0.725  | -0.008 | 0.011  | -0.030 | 0.074  | 0.083  | 0.123  | 0.028  | -0.048 | 0.012  | 0.058  | -0.043 | -0.061 |
| <b>OSRI1</b>  | 0.080  | 0.168  | 0.119  | -0.004 | 0.020  | -0.043 | -0.048 | -0.118 | 0.145  | -0.003 | -0.035 | 0.063  | 0.089  | -0.040 | 0.027  | -0.036 |
| <b>OSRI2</b>  | 0.128  | 0.002  | -0.145 | 0.129  | -0.032 | 0.006  | 0.015  | -0.026 | 0.231  | 0.040  | 0.061  | -0.027 | -0.050 | 0.055  | -0.014 | 0.056  |
| <b>OSRI3</b>  | 0.043  | 0.006  | -0.054 | -0.140 | 0.036  | 0.033  | 0.070  | 0.104  | 0.087  | 0.057  | -0.044 | -0.008 | 0.081  | 0.089  | 0.019  | -0.081 |
| <b>OSRI4</b>  | 0.104  | 0.031  | -0.064 | 0.012  | 0.030  | 0.050  | 0.030  | 0.020  | 0.076  | -0.014 | 0.011  | -0.038 | 0.051  | -0.018 | -0.047 | 0.011  |
| <b>OSRI5</b>  | -0.074 | 0.114  | 0.157  | 0.047  | -0.002 | -0.091 | -0.135 | 0.003  | -0.090 | -0.034 | 0.032  | 0.038  | 0.014  | -0.070 | -0.030 | -0.026 |
| <b>OSRI6</b>  | 0.045  | 0.151  | 0.206  | 0.010  | 0.077  | -0.086 | 0.019  | -0.071 | 0.169  | -0.001 | 0.006  | 0.048  | 0.038  | -0.023 | 0.012  | -0.027 |
| <b>OSRI7</b>  | 0.167  | -0.077 | -0.208 | 0.127  | -0.009 | -0.027 | 0.023  | -0.085 | 0.132  | -0.039 | -0.019 | -0.028 | -0.004 | 0.075  | -0.009 | 0.058  |
| <b>OSRI8</b>  | 0.086  | 0.090  | 0.204  | 0.019  | 0.066  | -0.136 | -0.032 | -0.067 | 0.035  | -0.055 | -0.051 | -0.003 | 0.071  | -0.094 | 0.026  | -0.081 |
| <b>OSRI9</b>  | 0.131  | 0.032  | -0.093 | -0.098 | 0.032  | 0.012  | 0.049  | 0.042  | 0.163  | 0.026  | -0.048 | -0.074 | 0.036  | 0.006  | 0.013  | 0.056  |
| <b>OSRI10</b> | 0.007  | 0.177  | 0.048  | -0.089 | 0.002  | -0.010 | 0.022  | -0.004 | 0.053  | -0.008 | -0.057 | 0.079  | 0.039  | -0.039 | 0.015  | -0.030 |
| <b>OSRI11</b> | 0.115  | 0.091  | -0.128 | -0.002 | 0.053  | 0.002  | 0.030  | 0.067  | 0.236  | -0.024 | -0.041 | -0.037 | -0.004 | 0.034  | 0.003  | 0.051  |
| <b>OSRI12</b> | 0.096  | -0.048 | -0.207 | 0.066  | 0.067  | 0.010  | 0.049  | -0.045 | 0.181  | -0.115 | 0.079  | -0.062 | 0.032  | 0.023  | -0.018 | 0.061  |
| <b>OSRI13</b> | 0.034  | 0.167  | 0.284  | 0.067  | -0.026 | -0.027 | -0.086 | -0.101 | 0.166  | -0.048 | 0.068  | 0.068  | 0.102  | -0.044 | 0.022  | -0.041 |
| <b>OSRI14</b> | 0.123  | 0.045  | -0.141 | 0.191  | 0.015  | -0.021 | 0.010  | -0.085 | 0.143  | -0.067 | 0.053  | -0.023 | 0.036  | -0.025 | -0.022 | 0.042  |
| <b>OSRI15</b> | 0.074  | 0.226  | 0.223  | 0.014  | -0.028 | -0.043 | -0.052 | -0.061 | 0.157  | -0.036 | 0.008  | 0.013  | 0.056  | -0.058 | 0.079  | -0.029 |
| <b>OSRI16</b> | 0.147  | 0.002  | -0.246 | 0.184  | 0.033  | -0.004 | 0.009  | -0.050 | 0.190  | -0.108 | 0.000  | -0.082 | 0.002  | 0.021  | 0.027  | 0.080  |
| <b>OSRI17</b> | 0.018  | 0.160  | 0.175  | 0.040  | -0.006 | -0.039 | -0.009 | -0.022 | 0.043  | -0.007 | -0.019 | 0.009  | 0.041  | -0.016 | -0.006 | -0.012 |
| <b>OSRI18</b> | 0.112  | -0.016 | -0.135 | 0.043  | 0.023  | 0.026  | 0.053  | -0.020 | 0.283  | -0.042 | 0.054  | -0.035 | -0.009 | 0.083  | -0.046 | 0.084  |
| <b>SOQ1a</b>  | -0.013 | 0.009  | -0.799 | 0.052  | 0.025  | -0.003 | -0.017 | 0.009  | -0.042 | -0.018 | 0.011  | 0.362  | 0.040  | 0.003  | 0.010  | -0.036 |
| <b>SOQ1b</b>  | 0.015  | -0.001 | -0.032 | -0.035 | 0.009  | 0.003  | 0.024  | 0.019  | 0.007  | 0.006  | -0.005 | 0.976  | -0.007 | -0.002 | 0.011  | -0.001 |
| <b>SOQ1c</b>  | -0.021 | 0.029  | 0.700  | 0.102  | -0.002 | -0.009 | -0.016 | 0.155  | -0.032 | -0.050 | 0.003  | 0.333  | 0.053  | -0.013 | 0.001  | -0.012 |

| Items  | F1     | F2     | F3     | F4     | F5     | F6     | F7     | F8     | F9     | F10    | F11    | F12    | F13    | F14    | F15    | F16    |
|--------|--------|--------|--------|--------|--------|--------|--------|--------|--------|--------|--------|--------|--------|--------|--------|--------|
| SOQ1d  | 0.037  | -0.009 | 0.039  | -0.043 | -0.037 | 0.024  | -0.040 | 0.299  | 0.073  | -0.002 | 0.040  | 0.604  | -0.004 | -0.002 | -0.027 | 0.012  |
| SOQ1e  | 0.023  | -0.060 | 0.052  | -0.069 | -0.022 | 0.053  | 0.007  | 0.159  | 0.213  | 0.050  | 0.011  | 0.559  | -0.029 | 0.046  | -0.028 | 0.021  |
| SOQ2a  | 0.030  | -0.002 | -0.819 | 0.070  | 0.014  | -0.019 | -0.019 | -0.025 | 0.213  | -0.007 | 0.008  | 0.023  | 0.046  | 0.008  | -0.006 | -0.002 |
| SOQ2b  | 0.041  | 0.024  | -0.118 | -0.028 | 0.042  | 0.011  | 0.019  | -0.031 | 0.694  | -0.019 | 0.041  | 0.200  | 0.030  | -0.008 | 0.014  | -0.024 |
| SOQ2c  | 0.009  | 0.083  | 0.712  | 0.058  | 0.020  | -0.003 | -0.007 | 0.088  | 0.290  | -0.009 | -0.030 | -0.012 | 0.033  | -0.024 | 0.060  | -0.022 |
| SOQ2d  | 0.018  | -0.000 | 0.072  | -0.081 | -0.021 | 0.012  | 0.016  | 0.130  | 0.729  | -0.004 | 0.054  | 0.007  | 0.034  | 0.039  | 0.015  | 0.028  |
| SOQ2e  | 0.033  | -0.055 | 0.039  | -0.098 | -0.002 | 0.049  | 0.061  | 0.061  | 0.761  | 0.042  | 0.020  | -0.006 | 0.010  | 0.030  | 0.021  | -0.003 |
| SOQ3a  | -0.023 | 0.021  | -0.806 | 0.018  | 0.017  | 0.022  | -0.014 | 0.417  | -0.053 | -0.014 | 0.002  | 0.025  | 0.053  | 0.002  | 0.024  | -0.040 |
| SOQ3b  | 0.012  | 0.013  | -0.099 | -0.039 | 0.035  | -0.013 | 0.032  | 0.740  | -0.003 | -0.003 | -0.003 | 0.259  | 0.010  | 0.009  | 0.037  | -0.013 |
| SOQ3c  | -0.008 | 0.036  | 0.621  | 0.098  | 0.020  | -0.021 | -0.011 | 0.581  | -0.065 | -0.034 | -0.022 | 0.030  | 0.040  | -0.010 | 0.024  | -0.019 |
| SOQ3d  | 0.016  | 0.020  | -0.044 | -0.055 | 0.013  | 0.013  | -0.010 | 0.916  | 0.046  | -0.007 | 0.030  | 0.036  | -0.006 | -0.004 | 0.002  | 0.003  |
| SOQ3e  | 0.028  | -0.034 | -0.009 | -0.075 | -0.010 | 0.029  | 0.024  | 0.729  | 0.163  | 0.062  | -0.019 | 0.091  | -0.009 | 0.032  | -0.007 | 0.007  |
| MSPD1a | 0.032  | 0.716  | 0.034  | -0.027 | -0.018 | 0.013  | -0.036 | -0.014 | 0.018  | -0.024 | -0.062 | -0.004 | 0.019  | 0.009  | 0.024  | -0.032 |
| MSPD1b | 0.016  | 0.020  | -0.021 | -0.088 | 0.011  | 0.149  | 0.518  | -0.012 | 0.117  | -0.006 | -0.027 | 0.037  | 0.092  | -0.003 | 0.019  | 0.003  |
| MSPD1c | 0.013  | -0.023 | -0.010 | -0.002 | 0.095  | 0.407  | 0.092  | 0.002  | 0.080  | 0.118  | -0.069 | -0.022 | 0.184  | 0.050  | 0.154  | -0.135 |
| MSPD1d | 0.004  | 0.026  | -0.019 | 0.012  | 0.107  | 0.457  | 0.035  | -0.019 | 0.001  | 0.040  | -0.027 | -0.016 | 0.210  | -0.076 | 0.211  | -0.102 |
| MSPD1e | 0.015  | 0.051  | 0.003  | -0.007 | 0.079  | 0.430  | 0.047  | -0.000 | 0.064  | 0.061  | -0.011 | -0.005 | 0.183  | -0.028 | 0.163  | 0.160  |
| MSPD2a | -0.010 | 0.781  | -0.010 | -0.025 | 0.019  | 0.057  | -0.065 | -0.010 | -0.009 | -0.001 | -0.023 | 0.034  | 0.020  | -0.097 | -0.004 | 0.014  |
| MSPD2b | 0.038  | -0.050 | -0.000 | -0.044 | 0.029  | 0.262  | 0.602  | 0.003  | 0.064  | 0.008  | 0.026  | 0.006  | 0.084  | 0.047  | -0.005 | -0.050 |
| MSPD2c | 0.022  | -0.040 | -0.005 | -0.015 | 0.021  | 0.741  | 0.050  | 0.015  | 0.037  | 0.039  | 0.068  | 0.002  | 0.018  | 0.131  | 0.007  | -0.088 |
| MSPD2d | 0.037  | -0.001 | -0.012 | -0.018 | 0.023  | 0.788  | 0.014  | -0.000 | -0.033 | -0.002 | 0.061  | 0.013  | 0.051  | 0.067  | 0.059  | -0.067 |
| MSPD2e | 0.030  | 0.007  | 0.011  | -0.010 | 0.026  | 0.745  | 0.013  | 0.011  | 0.012  | 0.051  | 0.085  | 0.023  | 0.034  | 0.051  | 0.015  | 0.209  |
| MSPD3a | -0.008 | 0.780  | 0.006  | 0.028  | -0.018 | -0.011 | -0.005 | -0.021 | 0.013  | -0.078 | -0.057 | -0.010 | 0.056  | -0.038 | 0.023  | 0.042  |
| MSPD3b | 0.045  | -0.036 | 0.025  | 0.046  | -0.009 | 0.176  | 0.586  | -0.006 | 0.026  | 0.065  | 0.053  | 0.018  | 0.048  | 0.099  | 0.108  | -0.048 |
| MSPD3c | -0.012 | -0.072 | 0.026  | 0.011  | 0.084  | 0.332  | 0.063  | -0.023 | 0.061  | 0.044  | 0.134  | 0.016  | 0.058  | 0.267  | 0.154  | -0.038 |
| MSPD3d | 0.026  | -0.026 | 0.021  | 0.010  | 0.090  | 0.350  | -0.032 | -0.027 | 0.024  | -0.008 | 0.172  | -0.001 | 0.078  | 0.189  | 0.212  | 0.001  |
| MSPD3e | 0.018  | -0.024 | 0.016  | 0.006  | 0.067  | 0.302  | -0.014 | -0.019 | 0.038  | 0.076  | 0.154  | 0.023  | 0.085  | 0.195  | 0.164  | 0.288  |
| MSPD4a | -0.025 | 0.756  | 0.000  | 0.024  | 0.002  | -0.058 | 0.010  | 0.003  | -0.002 | -0.054 | -0.079 | 0.006  | 0.007  | 0.148  | 0.011  | 0.047  |
| MSPD4b | 0.079  | 0.045  | -0.029 | -0.031 | 0.020  | -0.030 | 0.498  | 0.001  | 0.079  | 0.043  | 0.031  | 0.005  | 0.034  | 0.418  | 0.004  | -0.015 |
| MSPD4c | 0.039  | -0.001 | -0.007 | -0.013 | 0.050  | 0.086  | 0.030  | 0.012  | 0.002  | 0.039  | 0.073  | -0.004 | 0.049  | 0.739  | 0.055  | -0.065 |
| MSPD4d | 0.040  | 0.017  | -0.002 | -0.029 | 0.044  | 0.082  | -0.015 | 0.003  | -0.019 | 0.040  | 0.070  | -0.009 | 0.069  | 0.755  | 0.065  | -0.046 |
| MSPD4e | 0.038  | -0.005 | 0.011  | -0.026 | 0.030  | 0.097  | -0.006 | -0.014 | 0.024  | 0.024  | 0.071  | 0.029  | 0.086  | 0.632  | 0.087  | 0.238  |
| MSPD5a | -0.044 | 0.767  | 0.005  | -0.024 | -0.021 | -0.014 | 0.056  | 0.030  | -0.012 | 0.057  | -0.022 | -0.062 | -0.038 | 0.088  | 0.105  | -0.065 |
| MSPD5b | 0.094  | 0.103  | -0.003 | -0.041 | 0.018  | -0.022 | 0.606  | 0.048  | 0.046  | -0.030 | 0.021  | -0.006 | -0.022 | -0.009 | 0.314  | 0.099  |
| MSPD5c | 0.022  | -0.016 | 0.000  | -0.033 | 0.055  | 0.065  | 0.053  | 0.007  | 0.025  | 0.123  | 0.055  | -0.007 | 0.048  | 0.114  | 0.673  | -0.070 |

| Items   | F1     | F2     | F3     | F4     | F5     | F6     | F7     | F8     | F9     | F10    | F11    | F12    | F13    | F14    | F15    | F16    |
|---------|--------|--------|--------|--------|--------|--------|--------|--------|--------|--------|--------|--------|--------|--------|--------|--------|
| MSPD5d  | 0.058  | -0.004 | 0.003  | -0.027 | 0.066  | 0.072  | 0.007  | 0.005  | -0.019 | 0.065  | 0.107  | -0.010 | 0.063  | 0.041  | 0.725  | -0.059 |
| MSPD5e  | 0.027  | 0.020  | 0.012  | -0.004 | 0.058  | 0.080  | 0.016  | 0.006  | 0.024  | 0.103  | 0.118  | 0.024  | 0.029  | 0.110  | 0.590  | 0.256  |
| MSPD6a  | 0.010  | 0.735  | 0.007  | -0.015 | 0.024  | -0.062 | 0.000  | 0.022  | -0.038 | -0.102 | 0.169  | 0.001  | -0.021 | -0.049 | -0.106 | 0.040  |
| MSPD6b  | 0.058  | 0.052  | 0.006  | -0.034 | 0.012  | -0.022 | 0.571  | -0.010 | -0.019 | 0.011  | 0.447  | 0.020  | 0.005  | 0.025  | -0.042 | -0.044 |
| MSPD6c  | 0.012  | -0.043 | -0.013 | -0.009 | 0.033  | 0.043  | 0.037  | 0.005  | 0.040  | 0.048  | 0.759  | -0.017 | 0.055  | 0.103  | 0.048  | -0.097 |
| MSPD6d  | 0.031  | -0.013 | 0.001  | -0.004 | 0.039  | 0.067  | -0.025 | -0.010 | -0.001 | 0.025  | 0.798  | 0.000  | 0.068  | 0.045  | 0.072  | -0.067 |
| MSPD6e  | 0.028  | -0.003 | 0.004  | -0.017 | 0.034  | 0.048  | -0.003 | 0.018  | 0.025  | 0.048  | 0.749  | 0.014  | 0.079  | 0.010  | 0.057  | 0.210  |
| MSPD7a  | 0.110  | 0.571  | 0.005  | -0.003 | -0.022 | 0.021  | 0.034  | 0.002  | 0.051  | 0.093  | 0.021  | 0.030  | -0.043 | 0.046  | -0.000 | -0.106 |
| MSPD7b  | 0.028  | 0.055  | 0.013  | -0.058 | 0.079  | -0.060 | 0.509  | 0.023  | 0.014  | -0.087 | -0.009 | -0.039 | 0.330  | 0.014  | -0.026 | 0.052  |
| MSPD7c  | 0.037  | -0.043 | -0.008 | -0.034 | 0.024  | 0.030  | 0.035  | 0.004  | 0.049  | 0.124  | 0.032  | -0.024 | 0.723  | 0.079  | 0.020  | -0.115 |
| MSPD7d  | 0.027  | 0.011  | -0.023 | 0.004  | 0.030  | 0.040  | -0.009 | -0.022 | -0.019 | 0.045  | 0.096  | -0.016 | 0.796  | 0.031  | 0.038  | -0.078 |
| MSPD7e  | 0.019  | -0.001 | -0.003 | -0.028 | 0.053  | 0.049  | 0.019  | 0.001  | -0.013 | 0.064  | 0.050  | 0.007  | 0.734  | 0.028  | 0.006  | 0.229  |
| MSPD8a  | 0.120  | 0.564  | 0.002  | -0.019 | 0.091  | 0.054  | 0.098  | 0.007  | -0.013 | 0.050  | 0.053  | -0.031 | -0.050 | -0.058 | -0.064 | -0.050 |
| MSPD8b  | 0.106  | 0.120  | 0.003  | -0.008 | 0.439  | -0.040 | 0.442  | -0.032 | 0.007  | -0.027 | 0.010  | 0.011  | 0.026  | 0.030  | -0.073 | 0.009  |
| MSPD8c  | 0.008  | -0.036 | 0.004  | -0.009 | 0.943  | -0.024 | 0.003  | 0.013  | 0.002  | 0.023  | -0.018 | -0.013 | 0.017  | -0.001 | 0.018  | -0.058 |
| MSPD8d  | 0.001  | 0.005  | -0.005 | 0.018  | 0.974  | 0.002  | -0.028 | 0.002  | -0.017 | 0.006  | 0.026  | -0.008 | -0.010 | -0.014 | 0.027  | -0.052 |
| MSPD8e  | -0.015 | 0.005  | -0.005 | -0.000 | 0.918  | 0.030  | -0.009 | -0.004 | 0.001  | 0.033  | 0.003  | 0.011  | 0.001  | 0.025  | -0.025 | 0.128  |
| MSPD9a  | 0.102  | 0.562  | -0.050 | 0.055  | -0.080 | 0.035  | 0.088  | 0.013  | -0.046 | 0.303  | 0.022  | 0.002  | -0.085 | -0.067 | -0.098 | 0.039  |
| MSPD9b  | 0.109  | 0.047  | 0.018  | -0.000 | 0.020  | 0.014  | 0.501  | 0.023  | 0.003  | 0.396  | 0.021  | 0.038  | -0.019 | 0.034  | -0.039 | 0.012  |
| MSPD9c  | -0.002 | -0.036 | 0.007  | -0.005 | 0.088  | 0.021  | 0.015  | 0.006  | 0.012  | 0.786  | 0.032  | -0.006 | 0.090  | 0.047  | 0.053  | -0.087 |
| MSPD9d  | 0.021  | -0.001 | -0.001 | 0.009  | 0.088  | 0.014  | -0.029 | -0.002 | -0.027 | 0.776  | 0.063  | -0.002 | 0.081  | 0.011  | 0.099  | -0.046 |
| MSPD9e  | 0.030  | -0.013 | 0.007  | 0.016  | 0.070  | 0.053  | -0.017 | -0.005 | 0.013  | 0.719  | 0.039  | 0.031  | 0.094  | 0.041  | 0.051  | 0.196  |
| MSPD10a | 0.833  | 0.038  | 0.005  | -0.015 | -0.001 | 0.058  | -0.004 | 0.011  | -0.012 | 0.040  | 0.026  | -0.030 | 0.015  | -0.012 | -0.024 | -0.050 |
| MSPD10b | 0.869  | 0.020  | -0.045 | 0.045  | -0.009 | 0.032  | 0.005  | 0.001  | -0.032 | 0.066  | -0.002 | -0.031 | 0.003  | -0.012 | -0.011 | -0.033 |
| MSPD10c | 0.776  | -0.015 | -0.049 | 0.036  | -0.011 | -0.010 | -0.002 | -0.010 | -0.027 | -0.007 | 0.004  | 0.045  | 0.026  | -0.043 | 0.012  | 0.019  |
| MSPD10d | 0.774  | -0.046 | -0.054 | 0.057  | -0.034 | -0.074 | 0.050  | -0.031 | 0.023  | -0.035 | -0.012 | 0.037  | 0.006  | 0.089  | 0.029  | 0.029  |
| MSPD10e | 0.662  | -0.013 | -0.003 | 0.014  | -0.005 | -0.084 | 0.018  | -0.011 | 0.044  | -0.014 | 0.021  | 0.038  | 0.013  | 0.036  | 0.039  | 0.010  |
| MSPD10f | 0.852  | 0.052  | 0.039  | -0.050 | 0.023  | 0.023  | -0.063 | -0.012 | 0.003  | -0.040 | -0.010 | 0.007  | -0.018 | -0.022 | 0.053  | -0.001 |
| MSPD10g | 0.716  | -0.034 | -0.022 | 0.020  | -0.070 | -0.070 | 0.042  | 0.030  | -0.020 | -0.076 | 0.033  | 0.005  | -0.006 | -0.005 | 0.068  | 0.067  |
| MSPD10h | 0.762  | 0.002  | 0.020  | -0.088 | 0.064  | 0.037  | 0.002  | 0.048  | 0.011  | 0.036  | 0.014  | -0.033 | -0.049 | 0.042  | -0.029 | -0.006 |
| MSPD10i | 0.797  | -0.021 | 0.018  | -0.033 | 0.015  | 0.029  | 0.014  | -0.005 | 0.021  | 0.042  | 0.000  | 0.023  | 0.032  | 0.027  | -0.028 | -0.009 |
| MSPD10j | 0.741  | 0.025  | 0.112  | -0.078 | 0.056  | 0.020  | -0.018 | 0.012  | 0.016  | -0.032 | -0.012 | 0.005  | 0.053  | -0.010 | -0.029 | 0.012  |

Table SF69: EFA for Total Sample (Excluding Supplementary Items): 16 Factors Using Oblimin Rotation.

In Table SF70, we listed the items of each factor that exceeded the threshold of 0.40. In Factor 16, we did not have any loading exceeding this threshold.

| <b>Factor</b> | <b>Items</b>                                                                             |
|---------------|------------------------------------------------------------------------------------------|
| F1            | MSPD10a, MSPD10b, MSPD10c, MSPD10d, MSPD10e, MSPD10f, MSPD10g, MSPD10h, MSPD10i, MSPD10j |
| F2            | MSPD1a, MSPD2a, MSPD3a, MSPD4a, MSPD5a, MSPD6a, MSPD7a, MSPD8a, MSPD9a                   |
| F3            | MIQ4, MIQ5, SOQ1c, SOQ2c                                                                 |
| F4            | MIQ1, TCS1, TCS2, TCS3, TCS4, TCS5                                                       |
| F5            | MSPD8c, MSPD8d, MSPD8e                                                                   |
| F6            | MSPD1c, MSPD1d, MSPD1e, MSPD2c, MSPD2d, MSPD2e                                           |
| F7            | MSPD1b, MSPD2b, MSPD3b, MSPD5b, MSPD7b                                                   |
| F8            | SOQ3b, SOQ3d, SOQ3e                                                                      |
| F9            | SOQ2b, SOQ2d, SOQ2e                                                                      |
| F10           | MSPD9c, MSPD9d, MSPD9e                                                                   |
| F11           | MSPD6c, MSPD6d, MSPD6e                                                                   |
| F12           | SOQ1b, SOQ1d, SOQ1e                                                                      |
| F13           | MSPD7c, MSPD7d, MSPD7e                                                                   |
| F14           | MSPD4c, MSPD4d, MSPD4e                                                                   |
| F15           | MSPD5c, MSPD5d, MSPD5e                                                                   |
| F16           | -                                                                                        |

Table SF70: Factor Structure and Items: 16 Factors (Oblimin Rotation).

| <b>Factors</b> | <b>Eigenvalues</b> | <b>VAR</b> | <b>CUM</b> |
|----------------|--------------------|------------|------------|
| 1              | 6.4484             | 0.0638     | 0.0638     |
| 2              | 4.7605             | 0.0471     | 0.1110     |
| 3              | 4.6652             | 0.0462     | 0.1572     |
| 4              | 4.4324             | 0.0439     | 0.2011     |
| 5              | 3.3109             | 0.0328     | 0.2338     |
| 6              | 3.1725             | 0.0314     | 0.2652     |
| 7              | 2.9076             | 0.0288     | 0.2940     |
| 8              | 2.7321             | 0.0271     | 0.3211     |
| 9              | 2.7246             | 0.0270     | 0.3481     |
| 10             | 2.6626             | 0.0264     | 0.3744     |
| 11             | 2.5549             | 0.0253     | 0.3997     |
| 12             | 2.1889             | 0.0217     | 0.4214     |
| 13             | 2.1294             | 0.0211     | 0.4425     |
| 14             | 1.8420             | 0.0182     | 0.4607     |
| 15             | 0.7037             | 0.0070     | 0.4677     |

Table SF71: Factors, Eigenvalues, Variance Explained, and Cumulative Variance for 15 Factors (Oblimin Rotation).

| Items  | F1     | F2     | F3     | F4     | F5     | F6     | F7     | F8     | F9     | F10    | F11    | F12    | F13    | F14    | F15    |
|--------|--------|--------|--------|--------|--------|--------|--------|--------|--------|--------|--------|--------|--------|--------|--------|
| MIQ1   | -0.050 | -0.068 | 0.003  | 0.593  | -0.013 | 0.001  | -0.014 | -0.045 | 0.166  | 0.075  | 0.017  | -0.019 | 0.004  | -0.024 | -0.017 |
| MIQ3   | 0.116  | -0.089 | -0.450 | 0.088  | -0.015 | -0.013 | 0.053  | 0.017  | 0.092  | -0.047 | -0.023 | -0.060 | -0.120 | -0.012 | 0.123  |
| MIQ4   | -0.085 | 0.081  | 0.436  | 0.061  | 0.046  | 0.041  | 0.010  | -0.051 | 0.006  | 0.037  | 0.050  | 0.037  | 0.148  | -0.011 | -0.150 |
| MIQ5   | -0.090 | 0.146  | 0.581  | -0.031 | -0.007 | 0.022  | -0.096 | -0.042 | 0.126  | 0.029  | 0.028  | -0.008 | 0.147  | 0.051  | -0.069 |
| MIQ6   | 0.066  | -0.006 | 0.023  | -0.404 | -0.014 | -0.008 | 0.053  | -0.060 | 0.265  | -0.033 | -0.010 | -0.021 | -0.019 | 0.033  | 0.010  |
| MIQ7   | 0.064  | -0.061 | 0.034  | -0.419 | 0.047  | 0.008  | 0.071  | -0.078 | 0.307  | -0.004 | 0.015  | 0.021  | -0.019 | -0.051 | -0.012 |
| MIQ9   | 0.046  | 0.033  | -0.012 | -0.515 | 0.023  | 0.049  | -0.040 | 0.037  | 0.244  | 0.062  | 0.019  | 0.118  | 0.022  | -0.090 | -0.042 |
| MIQ10  | 0.098  | 0.033  | 0.042  | -0.455 | 0.004  | 0.026  | -0.063 | 0.037  | 0.235  | 0.073  | 0.016  | 0.113  | 0.087  | -0.070 | -0.065 |
| TCS1   | 0.003  | 0.054  | 0.008  | 0.711  | -0.014 | 0.029  | -0.060 | -0.091 | -0.087 | -0.029 | -0.042 | 0.023  | 0.002  | -0.004 | -0.036 |
| TCS2   | 0.002  | 0.000  | 0.033  | 0.819  | -0.007 | -0.007 | -0.007 | -0.060 | -0.052 | -0.048 | -0.023 | -0.024 | 0.010  | -0.018 | 0.015  |
| TCS3   | -0.038 | 0.018  | -0.025 | 0.799  | 0.008  | -0.009 | 0.018  | -0.035 | -0.094 | -0.045 | -0.013 | -0.035 | -0.004 | 0.015  | 0.020  |
| TCS4   | -0.040 | -0.008 | -0.005 | 0.797  | -0.005 | 0.018  | 0.018  | 0.044  | 0.124  | 0.030  | 0.007  | 0.009  | -0.037 | -0.035 | 0.014  |
| TCS5   | 0.031  | -0.046 | 0.001  | 0.726  | 0.014  | -0.010 | -0.031 | 0.074  | 0.084  | 0.131  | 0.031  | 0.058  | -0.049 | -0.043 | -0.061 |
| OSRI1  | 0.075  | 0.173  | 0.118  | -0.006 | -0.011 | 0.038  | -0.046 | -0.118 | 0.149  | 0.014  | -0.014 | -0.048 | 0.064  | 0.037  | -0.036 |
| OSRI2  | 0.131  | -0.002 | -0.144 | 0.129  | -0.020 | -0.045 | 0.016  | -0.025 | 0.229  | 0.033  | 0.047  | 0.060  | -0.028 | -0.021 | 0.061  |
| OSRI3  | 0.041  | 0.010  | -0.055 | -0.141 | 0.059  | 0.048  | 0.074  | 0.103  | 0.091  | 0.071  | -0.030 | 0.084  | -0.008 | 0.026  | -0.084 |
| OSRI4  | 0.101  | 0.032  | -0.064 | 0.010  | 0.066  | 0.040  | 0.035  | 0.021  | 0.077  | -0.004 | 0.020  | -0.020 | -0.038 | -0.046 | 0.018  |
| OSRI5  | -0.076 | 0.117  | 0.156  | 0.048  | -0.081 | 0.005  | -0.138 | 0.003  | -0.088 | -0.031 | 0.044  | -0.074 | 0.039  | -0.026 | -0.028 |
| OSRI6  | 0.043  | 0.155  | 0.204  | 0.011  | -0.070 | 0.085  | 0.020  | -0.072 | 0.172  | 0.005  | 0.017  | -0.031 | 0.047  | 0.017  | -0.032 |
| OSRI7  | 0.165  | -0.076 | -0.207 | 0.126  | -0.029 | -0.007 | 0.024  | -0.085 | 0.132  | -0.041 | -0.022 | 0.074  | -0.027 | -0.010 | 0.063  |
| OSRI8  | 0.082  | 0.096  | 0.203  | 0.019  | -0.102 | 0.086  | -0.033 | -0.069 | 0.041  | -0.045 | -0.029 | -0.107 | -0.003 | 0.040  | -0.090 |
| OSRI9  | 0.129  | 0.033  | -0.092 | -0.100 | 0.021  | 0.038  | 0.053  | 0.042  | 0.164  | 0.034  | -0.045 | 0.003  | -0.073 | 0.014  | 0.058  |
| OSRI10 | 0.005  | 0.181  | 0.047  | -0.089 | 0.008  | 0.010  | 0.023  | -0.005 | 0.057  | -0.002 | -0.047 | -0.046 | 0.079  | 0.021  | -0.035 |
| OSRI11 | 0.115  | 0.092  | -0.128 | -0.003 | 0.001  | 0.053  | 0.033  | 0.067  | 0.236  | -0.026 | -0.045 | 0.033  | -0.037 | 0.001  | 0.054  |
| OSRI12 | 0.094  | -0.046 | -0.206 | 0.064  | 0.021  | 0.075  | 0.054  | -0.045 | 0.180  | -0.115 | 0.088  | 0.021  | -0.061 | -0.018 | 0.070  |
| OSRI13 | 0.030  | 0.173  | 0.282  | 0.067  | 0.010  | -0.006 | -0.085 | -0.102 | 0.173  | -0.034 | 0.099  | -0.054 | 0.068  | 0.036  | -0.049 |
| OSRI14 | 0.120  | 0.046  | -0.140 | 0.189  | -0.009 | 0.023  | 0.014  | -0.085 | 0.144  | -0.061 | 0.062  | -0.027 | -0.022 | -0.021 | 0.050  |
| OSRI15 | 0.072  | 0.231  | 0.221  | 0.015  | -0.018 | -0.017 | -0.052 | -0.062 | 0.162  | -0.029 | 0.025  | -0.066 | 0.013  | 0.087  | -0.037 |
| OSRI16 | 0.146  | 0.001  | -0.245 | 0.183  | -0.006 | 0.038  | 0.012  | -0.049 | 0.189  | -0.111 | -0.000 | 0.023  | -0.081 | 0.028  | 0.091  |
| OSRI17 | 0.015  | 0.164  | 0.174  | 0.039  | -0.020 | 0.004  | -0.008 | -0.023 | 0.046  | 0.001  | -0.008 | -0.023 | 0.009  | -0.001 | -0.014 |
| OSRI18 | 0.112  | -0.017 | -0.134 | 0.041  | 0.018  | 0.021  | 0.056  | -0.020 | 0.280  | -0.046 | 0.050  | 0.085  | -0.034 | -0.052 | 0.094  |
| SOQ1a  | -0.015 | 0.011  | -0.800 | 0.051  | 0.011  | 0.032  | -0.017 | 0.008  | -0.039 | -0.012 | 0.021  | -0.000 | 0.361  | 0.015  | -0.038 |
| SOQ1b  | 0.015  | -0.002 | -0.033 | -0.035 | -0.002 | 0.006  | 0.023  | 0.019  | 0.007  | 0.005  | -0.009 | -0.002 | 0.976  | 0.010  | -0.003 |
| SOQ1c  | -0.025 | 0.032  | 0.698  | 0.100  | 0.011  | 0.011  | -0.013 | 0.155  | -0.030 | -0.041 | 0.017  | -0.017 | 0.335  | 0.008  | -0.011 |

| Items  | F1     | F2     | F3     | F4     | F5     | F6     | F7     | F8     | F9     | F10    | F11    | F12    | F13    | F14    | F15    |
|--------|--------|--------|--------|--------|--------|--------|--------|--------|--------|--------|--------|--------|--------|--------|--------|
| SOQ1d  | 0.037  | -0.010 | 0.039  | -0.044 | 0.017  | -0.040 | -0.040 | 0.301  | 0.071  | -0.002 | 0.038  | -0.000 | 0.604  | -0.029 | 0.016  |
| SOQ1e  | 0.026  | -0.063 | 0.052  | -0.069 | 0.036  | -0.032 | 0.006  | 0.161  | 0.210  | 0.046  | -0.001 | 0.051  | 0.559  | -0.034 | 0.023  |
| SOQ2a  | 0.029  | 0.000  | -0.819 | 0.069  | -0.006 | 0.022  | -0.018 | -0.026 | 0.217  | 0.000  | 0.018  | 0.005  | 0.022  | -0.000 | -0.001 |
| SOQ2b  | 0.042  | 0.024  | -0.119 | -0.027 | 0.015  | 0.043  | 0.021  | -0.031 | 0.700  | -0.018 | 0.046  | -0.009 | 0.198  | 0.017  | -0.029 |
| SOQ2c  | 0.008  | 0.084  | 0.712  | 0.057  | 0.008  | 0.026  | -0.004 | 0.089  | 0.292  | -0.002 | -0.024 | -0.026 | -0.012 | 0.062  | -0.020 |
| SOQ2d  | 0.019  | -0.001 | 0.073  | -0.082 | 0.011  | -0.020 | 0.019  | 0.131  | 0.732  | 0.000  | 0.058  | 0.041  | 0.006  | 0.017  | 0.030  |
| SOQ2e  | 0.036  | -0.058 | 0.039  | -0.100 | 0.042  | -0.008 | 0.064  | 0.062  | 0.761  | 0.043  | 0.015  | 0.033  | -0.008 | 0.017  | 0.001  |
| SOQ3a  | -0.025 | 0.023  | -0.807 | 0.018  | 0.042  | 0.026  | -0.012 | 0.416  | -0.050 | -0.006 | 0.015  | -0.001 | 0.025  | 0.029  | -0.042 |
| SOQ3b  | 0.012  | 0.014  | -0.100 | -0.039 | -0.012 | 0.037  | 0.033  | 0.740  | -0.002 | -0.002 | -0.002 | 0.008  | 0.259  | 0.039  | -0.016 |
| SOQ3c  | -0.011 | 0.039  | 0.620  | 0.098  | -0.005 | 0.030  | -0.008 | 0.581  | -0.063 | -0.027 | -0.012 | -0.014 | 0.032  | 0.030  | -0.021 |
| SOQ3d  | 0.017  | 0.019  | -0.044 | -0.055 | 0.008  | 0.011  | -0.010 | 0.917  | 0.045  | -0.009 | 0.028  | -0.004 | 0.036  | 0.000  | 0.004  |
| SOQ3e  | 0.030  | -0.036 | -0.008 | -0.075 | 0.020  | -0.015 | 0.024  | 0.730  | 0.161  | 0.062  | -0.027 | 0.034  | 0.091  | -0.010 | 0.007  |
| MSPD1a | 0.032  | 0.718  | 0.033  | -0.028 | 0.028  | -0.014 | -0.035 | -0.014 | 0.020  | -0.022 | -0.058 | 0.007  | -0.005 | 0.026  | -0.032 |
| MSPD1b | 0.011  | 0.022  | -0.020 | -0.090 | 0.176  | 0.022  | 0.533  | -0.011 | 0.119  | 0.005  | -0.020 | -0.009 | 0.037  | 0.019  | 0.009  |
| MSPD1c | 0.014  | -0.019 | -0.013 | -0.005 | 0.475  | 0.114  | 0.101  | 0.003  | 0.086  | 0.150  | -0.038 | 0.047  | -0.023 | 0.164  | -0.133 |
| MSPD1d | 0.003  | 0.030  | -0.021 | 0.006  | 0.538  | 0.130  | 0.048  | -0.017 | 0.006  | 0.078  | 0.010  | -0.077 | -0.017 | 0.218  | -0.090 |
| MSPD1e | 0.014  | 0.056  | 0.002  | -0.012 | 0.496  | 0.099  | 0.058  | -0.000 | 0.069  | 0.093  | 0.021  | -0.032 | -0.004 | 0.168  | 0.162  |
| MSPD2a | -0.009 | 0.782  | -0.012 | -0.026 | 0.070  | 0.021  | -0.064 | -0.010 | -0.009 | 0.003  | -0.018 | -0.098 | 0.034  | -0.004 | 0.012  |
| MSPD2b | 0.038  | -0.051 | -0.001 | -0.046 | 0.279  | 0.034  | 0.618  | 0.003  | 0.064  | 0.013  | 0.032  | 0.048  | 0.006  | -0.003 | -0.050 |
| MSPD2c | 0.036  | -0.048 | -0.009 | -0.017 | 0.734  | 0.000  | 0.053  | 0.016  | 0.036  | 0.035  | 0.068  | 0.154  | -0.000 | 0.002  | -0.085 |
| MSPD2d | 0.048  | -0.010 | -0.014 | -0.022 | 0.795  | 0.009  | 0.021  | 0.002  | -0.033 | 0.003  | 0.065  | 0.092  | 0.011  | 0.052  | -0.054 |
| MSPD2e | 0.040  | -0.000 | 0.010  | -0.015 | 0.739  | 0.010  | 0.020  | 0.012  | 0.010  | 0.055  | 0.084  | 0.074  | 0.024  | 0.004  | 0.214  |
| MSPD3a | -0.011 | 0.782  | 0.006  | 0.026  | 0.012  | -0.004 | -0.000 | -0.021 | 0.014  | -0.070 | -0.045 | -0.040 | -0.009 | 0.028  | 0.044  |
| MSPD3b | 0.047  | -0.039 | 0.024  | 0.045  | 0.181  | -0.013 | 0.599  | -0.006 | 0.026  | 0.067  | 0.050  | 0.101  | 0.017  | 0.106  | -0.048 |
| MSPD3c | -0.005 | -0.074 | 0.024  | 0.009  | 0.344  | 0.078  | 0.068  | -0.023 | 0.061  | 0.049  | 0.142  | 0.278  | 0.015  | 0.153  | -0.034 |
| MSPD3d | 0.031  | -0.029 | 0.021  | 0.007  | 0.371  | 0.088  | -0.024 | -0.025 | 0.024  | 0.004  | 0.184  | 0.201  | -0.002 | 0.207  | 0.018  |
| MSPD3e | 0.019  | -0.024 | 0.017  | 0.001  | 0.317  | 0.069  | -0.006 | -0.019 | 0.037  | 0.094  | 0.165  | 0.203  | 0.026  | 0.158  | 0.298  |
| MSPD4a | -0.027 | 0.757  | 0.001  | 0.024  | -0.056 | 0.007  | 0.013  | 0.004  | -0.001 | -0.053 | -0.080 | 0.150  | 0.007  | 0.013  | 0.049  |
| MSPD4b | 0.076  | 0.044  | -0.029 | -0.032 | -0.040 | 0.023  | 0.510  | 0.001  | 0.080  | 0.044  | 0.025  | 0.421  | 0.005  | 0.006  | -0.015 |
| MSPD4c | 0.040  | -0.001 | -0.007 | -0.014 | 0.083  | 0.055  | 0.033  | 0.013  | 0.006  | 0.044  | 0.077  | 0.752  | -0.003 | 0.061  | -0.067 |
| MSPD4d | 0.040  | 0.018  | -0.002 | -0.030 | 0.087  | 0.052  | -0.010 | 0.004  | -0.013 | 0.052  | 0.078  | 0.766  | -0.008 | 0.071  | -0.044 |
| MSPD4e | 0.034  | -0.002 | 0.013  | -0.030 | 0.104  | 0.043  | 0.002  | -0.013 | 0.026  | 0.040  | 0.081  | 0.642  | 0.033  | 0.089  | 0.244  |
| MSPD5a | -0.039 | 0.765  | 0.004  | -0.022 | -0.028 | -0.033 | 0.054  | 0.030  | -0.012 | 0.049  | -0.032 | 0.092  | -0.064 | 0.103  | -0.072 |
| MSPD5b | 0.096  | 0.100  | -0.001 | -0.040 | -0.044 | 0.008  | 0.615  | 0.048  | 0.042  | -0.043 | 0.003  | -0.007 | -0.006 | 0.313  | 0.100  |
| MSPD5c | 0.029  | -0.018 | -0.002 | -0.033 | 0.067  | 0.047  | 0.055  | 0.007  | 0.026  | 0.129  | 0.057  | 0.121  | -0.009 | 0.685  | -0.070 |

| Items   | F1     | F2     | F3     | F4     | F5     | F6     | F7     | F8     | F9     | F10    | F11    | F12    | F13    | F14    | F15    |
|---------|--------|--------|--------|--------|--------|--------|--------|--------|--------|--------|--------|--------|--------|--------|--------|
| MSPD5d  | 0.063  | -0.007 | 0.003  | -0.028 | 0.082  | 0.061  | 0.011  | 0.006  | -0.019 | 0.077  | 0.114  | 0.051  | -0.012 | 0.728  | -0.047 |
| MSPD5e  | 0.031  | 0.019  | 0.013  | -0.006 | 0.072  | 0.049  | 0.020  | 0.006  | 0.022  | 0.110  | 0.116  | 0.118  | 0.025  | 0.589  | 0.261  |
| MSPD6a  | 0.010  | 0.734  | 0.007  | -0.016 | -0.072 | 0.022  | 0.002  | 0.022  | -0.040 | -0.109 | 0.173  | -0.049 | 0.000  | -0.111 | 0.046  |
| MSPD6b  | 0.060  | 0.049  | 0.005  | -0.034 | -0.047 | 0.002  | 0.581  | -0.010 | -0.022 | 0.002  | 0.453  | 0.025  | 0.018  | -0.049 | -0.044 |
| MSPD6c  | 0.018  | -0.045 | -0.017 | -0.009 | 0.031  | 0.023  | 0.041  | 0.004  | 0.040  | 0.048  | 0.793  | 0.105  | -0.020 | 0.046  | -0.099 |
| MSPD6d  | 0.036  | -0.015 | -0.002 | -0.005 | 0.061  | 0.030  | -0.019 | -0.010 | -0.001 | 0.031  | 0.832  | 0.050  | -0.003 | 0.067  | -0.061 |
| MSPD6e  | 0.030  | -0.002 | 0.002  | -0.020 | 0.043  | 0.032  | 0.003  | 0.017  | 0.024  | 0.057  | 0.784  | 0.011  | 0.014  | 0.051  | 0.210  |
| MSPD7a  | 0.116  | 0.567  | 0.004  | -0.002 | 0.002  | -0.037 | 0.033  | 0.002  | 0.049  | 0.087  | 0.010  | 0.051  | 0.028  | -0.005 | -0.106 |
| MSPD7b  | 0.011  | 0.067  | 0.015  | -0.064 | 0.031  | 0.148  | 0.527  | 0.023  | 0.024  | -0.032 | 0.054  | 0.003  | -0.034 | 0.005  | 0.058  |
| MSPD7c  | 0.009  | -0.019 | -0.007 | -0.046 | 0.230  | 0.166  | 0.064  | 0.005  | 0.069  | 0.256  | 0.184  | 0.065  | -0.015 | 0.093  | -0.099 |
| MSPD7d  | -0.006 | 0.034  | -0.020 | -0.009 | 0.262  | 0.185  | 0.028  | -0.020 | 0.006  | 0.193  | 0.262  | 0.020  | -0.006 | 0.114  | -0.056 |
| MSPD7e  | -0.010 | 0.024  | -0.002 | -0.038 | 0.252  | 0.198  | 0.048  | -0.002 | 0.014  | 0.195  | 0.207  | 0.011  | 0.020  | 0.081  | 0.205  |
| MSPD8a  | 0.125  | 0.559  | 0.001  | -0.018 | 0.035  | 0.075  | 0.099  | 0.007  | -0.016 | 0.041  | 0.041  | -0.054 | -0.034 | -0.073 | -0.051 |
| MSPD8b  | 0.105  | 0.119  | 0.003  | -0.009 | -0.042 | 0.445  | 0.451  | -0.032 | 0.007  | -0.025 | 0.008  | 0.030  | 0.011  | -0.074 | 0.010  |
| MSPD8c  | 0.013  | -0.036 | 0.003  | -0.009 | -0.023 | 0.947  | 0.005  | 0.013  | 0.002  | 0.026  | -0.016 | 0.003  | -0.014 | 0.020  | -0.060 |
| MSPD8d  | 0.007  | 0.002  | -0.006 | 0.018  | -0.005 | 0.966  | -0.025 | 0.002  | -0.018 | 0.009  | 0.022  | -0.007 | -0.010 | 0.024  | -0.048 |
| MSPD8e  | -0.011 | 0.004  | -0.005 | -0.002 | 0.023  | 0.916  | -0.006 | -0.004 | -0.001 | 0.036  | -0.001 | 0.031  | 0.011  | -0.030 | 0.126  |
| MSPD9a  | 0.108  | 0.556  | -0.050 | 0.056  | -0.004 | -0.109 | 0.085  | 0.013  | -0.051 | 0.302  | -0.005 | -0.061 | -0.000 | -0.116 | 0.037  |
| MSPD9b  | 0.111  | 0.042  | 0.018  | -0.001 | -0.017 | -0.000 | 0.507  | 0.024  | -0.001 | 0.408  | -0.003 | 0.037  | 0.037  | -0.053 | 0.013  |
| MSPD9c  | 0.000  | -0.036 | 0.004  | -0.007 | 0.021  | 0.076  | 0.016  | 0.005  | 0.013  | 0.839  | 0.033  | 0.047  | -0.009 | 0.047  | -0.092 |
| MSPD9d  | 0.022  | -0.003 | -0.003 | 0.006  | 0.012  | 0.072  | -0.026 | -0.002 | -0.027 | 0.833  | 0.061  | 0.012  | -0.005 | 0.087  | -0.043 |
| MSPD9e  | 0.028  | -0.011 | 0.006  | 0.012  | 0.053  | 0.061  | -0.013 | -0.006 | 0.013  | 0.775  | 0.039  | 0.041  | 0.032  | 0.040  | 0.193  |
| MSPD10a | 0.836  | 0.038  | 0.005  | -0.015 | 0.062  | -0.001 | -0.004 | 0.012  | -0.012 | 0.042  | 0.029  | -0.012 | -0.030 | -0.025 | -0.048 |
| MSPD10b | 0.871  | 0.019  | -0.045 | 0.045  | 0.032  | -0.011 | 0.005  | 0.001  | -0.033 | 0.069  | -0.004 | -0.012 | -0.031 | -0.013 | -0.032 |
| MSPD10c | 0.775  | -0.014 | -0.048 | 0.036  | -0.003 | -0.004 | -0.001 | -0.010 | -0.026 | -0.003 | 0.010  | -0.045 | 0.046  | 0.015  | 0.018  |
| MSPD10d | 0.772  | -0.044 | -0.053 | 0.058  | -0.075 | -0.029 | 0.051  | -0.031 | 0.024  | -0.036 | -0.012 | 0.087  | 0.038  | 0.032  | 0.027  |
| MSPD10e | 0.661  | -0.012 | -0.002 | 0.014  | -0.083 | -0.001 | 0.019  | -0.011 | 0.045  | -0.013 | 0.025  | 0.032  | 0.038  | 0.043  | 0.008  |
| MSPD10f | 0.856  | 0.051  | 0.039  | -0.049 | 0.021  | 0.020  | -0.066 | -0.012 | 0.003  | -0.047 | -0.013 | -0.022 | 0.007  | 0.052  | -0.003 |
| MSPD10g | 0.715  | -0.033 | -0.021 | 0.020  | -0.075 | -0.068 | 0.043  | 0.030  | -0.020 | -0.080 | 0.032  | -0.007 | 0.007  | 0.069  | 0.068  |
| MSPD10h | 0.766  | -0.000 | 0.020  | -0.087 | 0.020  | 0.053  | 0.001  | 0.048  | 0.010  | 0.027  | 0.001  | 0.045  | -0.034 | -0.037 | -0.005 |
| MSPD10i | 0.797  | -0.020 | 0.018  | -0.033 | 0.035  | 0.021  | 0.015  | -0.005 | 0.022  | 0.047  | 0.005  | 0.027  | 0.024  | -0.026 | -0.007 |
| MSPD10j | 0.740  | 0.027  | 0.113  | -0.079 | 0.038  | 0.069  | -0.017 | 0.012  | 0.019  | -0.024 | -0.000 | -0.013 | 0.007  | -0.025 | 0.013  |

Table SF72: EFA for Total Sample (Excluding Supplementary Items): 15 Factors Using Oblimin Rotation.

In Table SF73, we listed the items of each factor that exceeded the threshold of 0.40. In Factor 15, we did not have any loading exceeding this threshold.

| Factor | Items                                                                                    |
|--------|------------------------------------------------------------------------------------------|
| F1     | MSPD10a, MSPD10b, MSPD10c, MSPD10d, MSPD10e, MSPD10f, MSPD10g, MSPD10h, MSPD10i, MSPD10j |
| F2     | MSPD1a, MSPD2a, MSPD3a, MSPD4a, MSPD5a, MSPD6a, MSPD7a, MSPD8a, MSPD9a                   |
| F3     | MIQ4, MIQ5, SOQ1c, SOQ2c                                                                 |
| F4     | MIQ1, TCS1, TCS2, TCS3, TCS4, TCS5                                                       |
| F5     | MSPD1c, MSPD1d, MSPD1e, MSPD2c, MSPD2d, MSPD2e                                           |
| F6     | MSPD8c, MSPD8d, MSPD8e                                                                   |
| F7     | MSPD1b, MSPD2b, MSPD3b, MSPD5b, MSPD7b                                                   |
| F8     | SOQ3a, SOQ3b, SOQ3d, SOQ3e                                                               |
| F9     | SOQ2b, SOQ2d, SOQ2e                                                                      |
| F10    | MSPD9c, MSPD9d, MSPD9e                                                                   |
| F11    | MSPD6c, MSPD6d, MSPD6e                                                                   |
| F12    | MSPD4c, MSPD4d, MSPD4e                                                                   |
| F13    | SOQ1b, SOQ1d, SOQ1e                                                                      |
| F14    | MSPD5c, MSPD5d, MSPD5e                                                                   |
| F15    | -                                                                                        |

Table SF73: Factor Structure and Items: 15 Factors (Oblimin Rotation).

| Factors | Eigenvalues | VAR    | CUM    |
|---------|-------------|--------|--------|
| 1       | 6.5297      | 0.0647 | 0.0647 |
| 2       | 4.7719      | 0.0472 | 0.1119 |
| 3       | 4.7213      | 0.0467 | 0.1586 |
| 4       | 4.4464      | 0.0440 | 0.2027 |
| 5       | 3.1503      | 0.0312 | 0.2339 |
| 6       | 3.0490      | 0.0302 | 0.2640 |
| 7       | 3.0283      | 0.0300 | 0.2940 |
| 8       | 2.8851      | 0.0286 | 0.3226 |
| 9       | 2.8526      | 0.0282 | 0.3508 |
| 10      | 2.8418      | 0.0281 | 0.3790 |
| 11      | 2.7304      | 0.0270 | 0.4060 |
| 12      | 2.7151      | 0.0269 | 0.4329 |
| 13      | 2.1742      | 0.0215 | 0.4544 |
| 14      | 1.2601      | 0.0125 | 0.4669 |

Table SF74: Factors, Eigenvalues, Variance Explained, and Cumulative Variance for 14 Factors (Oblimin Rotation).

| Items  | F1     | F2     | F3     | F4     | F5     | F6     | F7     | F8     | F9     | F10    | F11    | F12    | F13    | F14    |
|--------|--------|--------|--------|--------|--------|--------|--------|--------|--------|--------|--------|--------|--------|--------|
| MIQ1   | -0.054 | -0.068 | 0.005  | 0.595  | 0.001  | -0.018 | -0.009 | -0.020 | 0.076  | 0.018  | -0.044 | 0.166  | 0.004  | -0.034 |
| MIQ3   | 0.114  | -0.087 | -0.455 | 0.089  | -0.006 | 0.062  | -0.062 | -0.091 | -0.043 | -0.025 | 0.022  | 0.111  | -0.130 | 0.127  |
| MIQ4   | -0.084 | 0.075  | 0.442  | 0.058  | 0.031  | 0.002  | 0.092  | 0.066  | 0.032  | 0.053  | -0.056 | -0.016 | 0.161  | -0.151 |
| MIQ5   | -0.089 | 0.149  | 0.588  | -0.031 | 0.019  | -0.106 | 0.051  | 0.016  | 0.032  | 0.032  | -0.043 | 0.107  | 0.154  | -0.062 |
| MIQ6   | 0.068  | -0.001 | 0.025  | -0.401 | -0.009 | 0.048  | 0.036  | -0.029 | -0.039 | -0.012 | -0.058 | 0.262  | -0.018 | 0.002  |
| MIQ7   | 0.067  | -0.065 | 0.031  | -0.418 | 0.001  | 0.068  | 0.057  | 0.005  | -0.019 | 0.015  | -0.083 | 0.311  | -0.014 | -0.041 |
| MIQ9   | 0.052  | 0.027  | -0.016 | -0.513 | 0.044  | -0.045 | 0.018  | 0.108  | 0.043  | 0.017  | 0.029  | 0.250  | 0.027  | -0.100 |
| MIQ10  | 0.104  | 0.029  | 0.040  | -0.452 | 0.021  | -0.072 | 0.021  | 0.110  | 0.057  | 0.014  | 0.032  | 0.237  | 0.091  | -0.123 |
| TCS1   | 0.004  | 0.054  | 0.011  | 0.712  | 0.026  | -0.066 | 0.014  | 0.035  | -0.032 | -0.041 | -0.094 | -0.095 | 0.008  | -0.041 |
| TCS2   | 0.002  | -0.000 | 0.032  | 0.819  | -0.009 | -0.010 | 0.000  | -0.028 | -0.053 | -0.023 | -0.063 | -0.053 | 0.011  | 0.010  |
| TCS3   | -0.040 | 0.017  | -0.024 | 0.796  | -0.009 | 0.020  | -0.000 | -0.027 | -0.040 | -0.012 | -0.034 | -0.098 | -0.003 | 0.038  |
| TCS4   | -0.043 | -0.009 | -0.005 | 0.800  | 0.020  | 0.020  | -0.018 | 0.003  | 0.027  | 0.006  | 0.043  | 0.130  | -0.038 | -0.001 |
| TCS5   | 0.033  | -0.050 | 0.002  | 0.732  | -0.019 | -0.037 | 0.054  | 0.055  | 0.118  | 0.032  | 0.072  | 0.084  | -0.048 | -0.091 |
| OSRI1  | 0.077  | 0.176  | 0.124  | -0.007 | 0.034  | -0.051 | 0.052  | -0.049 | 0.016  | -0.015 | -0.120 | 0.132  | 0.074  | -0.019 |
| OSRI2  | 0.132  | 0.001  | -0.148 | 0.132  | -0.037 | 0.018  | -0.061 | 0.047  | 0.034  | 0.049  | -0.027 | 0.243  | -0.029 | 0.036  |
| OSRI3  | 0.045  | 0.008  | -0.051 | -0.141 | 0.037  | 0.067  | 0.128  | 0.095  | 0.062  | -0.029 | 0.107  | 0.078  | -0.007 | -0.078 |
| OSRI4  | 0.101  | 0.024  | -0.067 | 0.008  | 0.036  | 0.040  | 0.035  | -0.029 | -0.010 | 0.021  | 0.017  | 0.082  | -0.035 | 0.014  |
| OSRI5  | -0.080 | 0.117  | 0.159  | 0.045  | 0.009  | -0.138 | -0.091 | -0.079 | -0.023 | 0.041  | -0.000 | -0.095 | 0.044  | -0.030 |
| OSRI6  | 0.044  | 0.161  | 0.210  | 0.011  | 0.086  | 0.014  | -0.015 | -0.042 | 0.004  | 0.011  | -0.074 | 0.160  | 0.054  | -0.033 |
| OSRI7  | 0.168  | -0.075 | -0.210 | 0.126  | -0.001 | 0.030  | -0.052 | 0.059  | -0.041 | -0.030 | -0.087 | 0.138  | -0.026 | 0.059  |
| OSRI8  | 0.084  | 0.105  | 0.212  | 0.022  | 0.080  | -0.051 | 0.028  | -0.116 | -0.051 | -0.034 | -0.063 | 0.017  | -0.003 | -0.091 |
| OSRI9  | 0.134  | 0.034  | -0.093 | -0.099 | 0.038  | 0.053  | 0.035  | -0.012 | 0.029  | -0.048 | 0.041  | 0.166  | -0.071 | 0.054  |
| OSRI10 | 0.007  | 0.182  | 0.051  | -0.090 | 0.006  | 0.016  | 0.052  | -0.041 | -0.003 | -0.047 | -0.006 | 0.044  | 0.085  | -0.032 |
| OSRI11 | 0.117  | 0.092  | -0.127 | -0.005 | 0.057  | 0.036  | -0.010 | 0.020  | -0.027 | -0.047 | 0.064  | 0.237  | -0.030 | 0.054  |
| OSRI12 | 0.098  | -0.049 | -0.208 | 0.064  | 0.074  | 0.058  | 0.011  | -0.000 | -0.126 | 0.086  | -0.048 | 0.184  | -0.057 | 0.063  |
| OSRI13 | 0.029  | 0.172  | 0.290  | 0.061  | -0.007 | -0.088 | 0.030  | -0.038 | -0.024 | 0.102  | -0.103 | 0.152  | 0.079  | -0.010 |
| OSRI14 | 0.121  | 0.046  | -0.143 | 0.190  | 0.024  | 0.015  | -0.009 | -0.049 | -0.070 | 0.061  | -0.080 | 0.149  | -0.031 | 0.041  |
| OSRI15 | 0.071  | 0.235  | 0.232  | 0.011  | -0.018 | -0.055 | 0.042  | -0.051 | -0.016 | 0.027  | -0.059 | 0.137  | 0.023  | 0.008  |
| OSRI16 | 0.143  | 0.003  | -0.244 | 0.180  | 0.050  | 0.022  | -0.067 | 0.025  | -0.098 | 0.001  | -0.044 | 0.197  | -0.086 | 0.117  |
| OSRI17 | 0.018  | 0.164  | 0.176  | 0.038  | 0.001  | -0.010 | 0.015  | -0.033 | -0.005 | -0.013 | -0.027 | 0.036  | 0.017  | -0.013 |
| OSRI18 | 0.117  | -0.019 | -0.141 | 0.044  | 0.024  | 0.063  | -0.022 | 0.061  | -0.060 | 0.043  | -0.021 | 0.299  | -0.039 | 0.064  |
| SOQ1a  | -0.015 | 0.011  | -0.799 | 0.050  | 0.030  | -0.019 | 0.037  | 0.011  | -0.010 | 0.020  | 0.006  | -0.054 | 0.377  | -0.032 |
| SOQ1b  | 0.017  | 0.002  | -0.039 | -0.037 | 0.009  | 0.023  | -0.009 | -0.002 | 0.005  | -0.010 | 0.035  | 0.008  | 0.950  | 0.002  |
| SOQ1c  | -0.020 | 0.029  | 0.702  | 0.098  | 0.008  | -0.011 | 0.024  | -0.020 | -0.046 | 0.013  | 0.140  | -0.041 | 0.356  | 0.004  |

| Items  | F1     | F2     | F3     | F4     | F5     | F6     | F7     | F8     | F9     | F10    | F11    | F12    | F13    | F14    |
|--------|--------|--------|--------|--------|--------|--------|--------|--------|--------|--------|--------|--------|--------|--------|
| SOQ1d  | 0.038  | -0.014 | 0.037  | -0.046 | -0.038 | -0.033 | -0.031 | -0.007 | -0.000 | 0.039  | 0.284  | 0.074  | 0.626  | 0.015  |
| SOQ1e  | 0.027  | -0.068 | 0.049  | -0.071 | -0.029 | 0.017  | -0.015 | 0.044  | 0.047  | -0.006 | 0.144  | 0.216  | 0.581  | 0.022  |
| SOQ2a  | 0.028  | 0.001  | -0.815 | 0.069  | 0.022  | -0.021 | 0.011  | 0.003  | 0.001  | 0.018  | -0.023 | 0.211  | 0.029  | -0.007 |
| SOQ2b  | 0.038  | 0.027  | -0.111 | -0.028 | 0.044  | 0.017  | 0.038  | -0.001 | -0.012 | 0.049  | -0.024 | 0.687  | 0.200  | -0.028 |
| SOQ2c  | 0.005  | 0.087  | 0.720  | 0.056  | 0.027  | -0.004 | 0.036  | -0.012 | 0.007  | -0.022 | 0.092  | 0.279  | -0.010 | 0.014  |
| SOQ2d  | 0.015  | 0.002  | 0.078  | -0.081 | -0.013 | 0.022  | -0.008 | 0.040  | 0.008  | 0.063  | 0.133  | 0.735  | 0.011  | 0.034  |
| SOQ2e  | 0.032  | -0.056 | 0.046  | -0.099 | -0.006 | 0.065  | 0.049  | 0.035  | 0.048  | 0.017  | 0.063  | 0.758  | 0.001  | 0.008  |
| SOQ3a  | -0.024 | 0.021  | -0.802 | 0.016  | 0.020  | -0.017 | 0.074  | 0.016  | -0.005 | 0.017  | 0.419  | -0.063 | 0.034  | -0.028 |
| SOQ3b  | 0.013  | 0.018  | -0.097 | -0.038 | 0.038  | 0.031  | 0.006  | 0.012  | -0.002 | -0.001 | 0.753  | -0.002 | 0.242  | -0.008 |
| SOQ3c  | -0.009 | 0.038  | 0.627  | 0.096  | 0.029  | -0.008 | 0.009  | -0.011 | -0.027 | -0.012 | 0.577  | -0.071 | 0.037  | -0.001 |
| SOQ3d  | 0.018  | 0.018  | -0.040 | -0.054 | 0.010  | -0.009 | 0.000  | -0.010 | -0.012 | 0.032  | 0.912  | 0.050  | 0.040  | 0.004  |
| SOQ3e  | 0.030  | -0.038 | -0.006 | -0.075 | -0.014 | 0.030  | -0.003 | 0.028  | 0.062  | -0.030 | 0.726  | 0.169  | 0.096  | 0.008  |
| MSPD1a | 0.039  | 0.720  | 0.036  | -0.025 | -0.027 | -0.046 | 0.125  | 0.009  | -0.038 | -0.055 | -0.013 | 0.008  | -0.002 | -0.043 |
| MSPD1b | 0.023  | 0.020  | -0.024 | -0.085 | -0.002 | 0.526  | 0.292  | -0.033 | -0.036 | -0.017 | -0.012 | 0.115  | 0.036  | -0.022 |
| MSPD1c | 0.039  | -0.029 | -0.008 | 0.005  | 0.044  | 0.062  | 0.807  | 0.089  | 0.084  | -0.012 | 0.009  | 0.050  | -0.020 | -0.104 |
| MSPD1d | 0.026  | 0.021  | -0.015 | 0.011  | 0.061  | 0.011  | 0.863  | -0.033 | 0.019  | 0.047  | -0.007 | -0.036 | -0.015 | -0.002 |
| MSPD1e | 0.048  | 0.048  | -0.005 | -0.007 | 0.046  | 0.032  | 0.709  | -0.029 | 0.025  | 0.051  | -0.006 | 0.058  | 0.002  | 0.191  |
| MSPD2a | -0.009 | 0.775  | -0.010 | -0.030 | 0.015  | -0.063 | 0.069  | -0.092 | 0.005  | -0.013 | -0.012 | -0.013 | 0.039  | 0.025  |
| MSPD2b | 0.034  | -0.070 | -0.001 | -0.056 | 0.023  | 0.638  | 0.201  | 0.084  | 0.018  | 0.039  | 0.002  | 0.056  | 0.014  | -0.005 |
| MSPD2c | 0.016  | -0.098 | -0.007 | -0.052 | -0.011 | 0.095  | 0.355  | 0.332  | 0.103  | 0.123  | 0.015  | 0.029  | 0.019  | 0.102  |
| MSPD2d | 0.025  | -0.062 | -0.011 | -0.059 | -0.004 | 0.068  | 0.406  | 0.277  | 0.080  | 0.128  | 0.004  | -0.040 | 0.027  | 0.177  |
| MSPD2e | 0.033  | -0.049 | -0.002 | -0.047 | 0.006  | 0.069  | 0.313  | 0.201  | 0.104  | 0.138  | -0.003 | 0.028  | 0.044  | 0.351  |
| MSPD3a | -0.011 | 0.783  | 0.008  | 0.024  | -0.003 | 0.004  | 0.015  | -0.043 | -0.063 | -0.044 | -0.018 | 0.015  | -0.011 | 0.069  |
| MSPD3b | 0.042  | -0.047 | 0.031  | 0.034  | -0.015 | 0.624  | 0.152  | 0.141  | 0.086  | 0.047  | 0.000  | 0.006  | 0.023  | 0.051  |
| MSPD3c | -0.011 | -0.092 | 0.032  | -0.013 | 0.077  | 0.098  | 0.207  | 0.381  | 0.092  | 0.158  | -0.015 | 0.042  | 0.025  | 0.165  |
| MSPD3d | 0.023  | -0.047 | 0.031  | -0.018 | 0.089  | 0.013  | 0.225  | 0.304  | 0.058  | 0.206  | -0.014 | 0.005  | 0.005  | 0.263  |
| MSPD3e | 0.028  | -0.037 | 0.010  | -0.018 | 0.079  | 0.033  | 0.125  | 0.240  | 0.123  | 0.177  | -0.026 | 0.049  | 0.038  | 0.453  |
| MSPD4a | -0.023 | 0.762  | -0.001 | 0.024  | 0.016  | 0.018  | -0.066 | 0.143  | -0.052 | -0.086 | 0.003  | 0.009  | 0.005  | 0.051  |
| MSPD4b | 0.088  | 0.053  | -0.034 | -0.024 | 0.027  | 0.515  | -0.010 | 0.406  | 0.021  | 0.016  | -0.004 | 0.092  | 0.006  | -0.069 |
| MSPD4c | 0.052  | 0.000  | -0.011 | -0.013 | 0.060  | 0.046  | 0.031  | 0.818  | 0.040  | 0.082  | 0.011  | 0.016  | -0.003 | -0.043 |
| MSPD4d | 0.053  | 0.018  | -0.008 | -0.030 | 0.057  | 0.006  | 0.042  | 0.810  | 0.047  | 0.089  | 0.002  | -0.000 | -0.009 | -0.007 |
| MSPD4e | 0.057  | 0.001  | -0.003 | -0.030 | 0.060  | 0.028  | -0.010 | 0.643  | 0.030  | 0.091  | -0.026 | 0.062  | 0.036  | 0.255  |
| MSPD5a | -0.042 | 0.770  | 0.014  | -0.023 | -0.029 | 0.054  | 0.013  | 0.129  | 0.070  | -0.026 | 0.043  | -0.025 | -0.071 | -0.033 |
| MSPD5b | 0.096  | 0.126  | 0.011  | -0.036 | 0.030  | 0.613  | 0.022  | 0.030  | -0.010 | 0.016  | 0.069  | 0.028  | -0.019 | 0.174  |
| MSPD5c | 0.020  | 0.018  | 0.038  | -0.030 | 0.072  | 0.047  | 0.237  | 0.297  | 0.220  | 0.115  | 0.054  | -0.031 | -0.023 | 0.189  |

| Items   | F1     | F2     | F3     | F4     | F5     | F6     | F7     | F8     | F9     | F10    | F11    | F12    | F13    | F14    |
|---------|--------|--------|--------|--------|--------|--------|--------|--------|--------|--------|--------|--------|--------|--------|
| MSPD5d  | 0.049  | 0.030  | 0.044  | -0.027 | 0.087  | 0.011  | 0.245  | 0.233  | 0.177  | 0.174  | 0.057  | -0.076 | -0.028 | 0.246  |
| MSPD5e  | 0.038  | 0.051  | 0.032  | -0.005 | 0.081  | 0.027  | 0.130  | 0.226  | 0.176  | 0.164  | 0.033  | 0.001  | 0.016  | 0.436  |
| MSPD6a  | 0.012  | 0.732  | -0.000 | -0.013 | 0.023  | 0.004  | -0.098 | -0.094 | -0.124 | 0.171  | 0.012  | -0.023 | 0.003  | -0.021 |
| MSPD6b  | 0.057  | 0.051  | 0.002  | -0.030 | 0.004  | 0.593  | -0.058 | -0.013 | -0.011 | 0.458  | -0.013 | -0.015 | 0.017  | -0.095 |
| MSPD6c  | 0.017  | -0.042 | -0.013 | -0.007 | 0.019  | 0.037  | 0.042  | 0.115  | 0.046  | 0.830  | 0.009  | 0.033  | -0.021 | -0.087 |
| MSPD6d  | 0.034  | -0.013 | 0.002  | -0.005 | 0.028  | -0.018 | 0.048  | 0.061  | 0.036  | 0.872  | -0.004 | -0.007 | -0.004 | -0.020 |
| MSPD6e  | 0.044  | 0.001  | -0.007 | -0.016 | 0.039  | 0.012  | -0.015 | -0.020 | 0.046  | 0.800  | 0.007  | 0.043  | 0.018  | 0.191  |
| MSPD7a  | 0.111  | 0.563  | 0.009  | -0.003 | -0.038 | 0.035  | 0.003  | 0.075  | 0.098  | 0.014  | 0.008  | 0.041  | 0.026  | -0.105 |
| MSPD7b  | 0.011  | 0.066  | 0.012  | -0.065 | 0.151  | 0.542  | 0.016  | -0.028 | -0.040 | 0.048  | 0.022  | 0.032  | -0.035 | 0.060  |
| MSPD7c  | 0.010  | -0.028 | -0.000 | -0.052 | 0.149  | 0.062  | 0.262  | 0.110  | 0.263  | 0.204  | 0.010  | 0.048  | -0.009 | -0.021 |
| MSPD7d  | -0.004 | 0.023  | -0.014 | -0.018 | 0.168  | 0.030  | 0.285  | 0.059  | 0.200  | 0.286  | -0.015 | -0.014 | -0.000 | 0.050  |
| MSPD7e  | 0.002  | 0.014  | -0.009 | -0.047 | 0.194  | 0.061  | 0.179  | 0.012  | 0.193  | 0.222  | -0.011 | 0.020  | 0.031  | 0.264  |
| MSPD8a  | 0.121  | 0.547  | 0.001  | -0.022 | 0.071  | 0.108  | 0.005  | -0.061 | 0.043  | 0.037  | 0.005  | -0.015 | -0.032 | -0.062 |
| MSPD8b  | 0.103  | 0.117  | -0.002 | -0.007 | 0.449  | 0.464  | -0.061 | -0.008 | -0.038 | -0.010 | -0.036 | 0.018  | 0.010  | -0.035 |
| MSPD8c  | 0.006  | -0.035 | 0.007  | -0.008 | 0.949  | -0.001 | 0.012  | 0.011  | 0.031  | -0.018 | 0.017  | -0.004 | -0.016 | -0.060 |
| MSPD8d  | -0.000 | 0.002  | -0.002 | 0.017  | 0.967  | -0.028 | 0.022  | -0.000 | 0.014  | 0.021  | 0.006  | -0.024 | -0.012 | -0.032 |
| MSPD8e  | -0.008 | 0.001  | -0.013 | -0.002 | 0.918  | -0.001 | -0.018 | 0.007  | 0.027  | -0.006 | -0.013 | 0.016  | 0.014  | 0.094  |
| MSPD9a  | 0.102  | 0.544  | -0.058 | 0.051  | -0.101 | 0.106  | -0.118 | -0.089 | 0.315  | -0.018 | 0.004  | -0.031 | 0.002  | 0.013  |
| MSPD9b  | 0.108  | 0.039  | 0.011  | -0.001 | 0.008  | 0.528  | -0.069 | 0.002  | 0.413  | -0.021 | 0.016  | 0.014  | 0.038  | -0.020 |
| MSPD9c  | -0.003 | -0.035 | 0.006  | -0.008 | 0.075  | 0.015  | 0.047  | 0.050  | 0.867  | 0.030  | 0.006  | 0.011  | -0.009 | -0.076 |
| MSPD9d  | 0.020  | 0.001  | -0.001 | 0.006  | 0.074  | -0.025 | 0.048  | 0.009  | 0.857  | 0.060  | 0.001  | -0.028 | -0.006 | -0.007 |
| MSPD9e  | 0.040  | -0.010 | -0.006 | 0.013  | 0.072  | -0.004 | 0.014  | 0.000  | 0.770  | 0.040  | -0.019 | 0.038  | 0.036  | 0.176  |
| MSPD10a | 0.836  | 0.028  | 0.007  | -0.018 | -0.009 | -0.002 | 0.043  | -0.004 | 0.045  | 0.030  | 0.013  | -0.018 | -0.032 | -0.037 |
| MSPD10b | 0.872  | 0.012  | -0.044 | 0.043  | -0.015 | 0.008  | 0.011  | -0.006 | 0.075  | -0.005 | 0.002  | -0.038 | -0.031 | -0.024 |
| MSPD10c | 0.778  | -0.014 | -0.048 | 0.036  | -0.005 | -0.001 | -0.005 | -0.051 | 0.001  | 0.009  | -0.009 | -0.029 | 0.045  | 0.028  |
| MSPD10d | 0.782  | -0.035 | -0.054 | 0.066  | -0.028 | 0.043  | -0.023 | 0.071  | -0.049 | -0.015 | -0.032 | 0.024  | 0.038  | -0.001 |
| MSPD10e | 0.670  | -0.001 | -0.000 | 0.021  | -0.000 | 0.008  | -0.011 | 0.016  | -0.024 | 0.023  | -0.012 | 0.040  | 0.039  | -0.013 |
| MSPD10f | 0.860  | 0.052  | 0.043  | -0.049 | 0.017  | -0.071 | 0.037  | -0.005 | -0.042 | -0.009 | -0.008 | -0.006 | 0.005  | 0.016  |
| MSPD10g | 0.723  | -0.022 | -0.019 | 0.027  | -0.064 | 0.037  | -0.034 | -0.020 | -0.085 | 0.035  | 0.031  | -0.021 | 0.004  | 0.058  |
| MSPD10h | 0.767  | -0.008 | 0.019  | -0.089 | 0.054  | 0.008  | -0.034 | 0.047  | 0.031  | -0.004 | 0.045  | 0.013  | -0.032 | -0.007 |
| MSPD10i | 0.802  | -0.027 | 0.016  | -0.033 | 0.018  | 0.016  | 0.011  | 0.028  | 0.045  | 0.002  | -0.007 | 0.023  | 0.024  | -0.016 |
| MSPD10j | 0.745  | 0.021  | 0.111  | -0.079 | 0.064  | -0.017 | 0.026  | -0.019 | -0.032 | -0.001 | 0.008  | 0.019  | 0.008  | 0.003  |

Table SF75: EFA for Total Sample (Excluding Supplementary Items): 14 Factors Using Oblimin Rotation.

In Table SF76, we listed the items of each factor that exceeded the threshold of 0.40. In Factor 14, we did not have any loading exceeding this threshold.

| <b>Factor</b> | <b>Items</b>                                                                             |
|---------------|------------------------------------------------------------------------------------------|
| F1            | MSPD10a, MSPD10b, MSPD10c, MSPD10d, MSPD10e, MSPD10f, MSPD10g, MSPD10h, MSPD10i, MSPD10j |
| F2            | MSPD1a, MSPD2a, MSPD3a, MSPD4a, MSPD5a, MSPD6a, MSPD7a, MSPD8a, MSPD9a                   |
| F3            | MIQ4, MIQ5, SOQ1c, SOQ2c                                                                 |
| F4            | MIQ1, TCS1, TCS2, TCS3, TCS4, TCS5                                                       |
| F5            | MSPD8c, MSPD8d, MSPD8e                                                                   |
| F6            | MSPD1b, MSPD2b, MSPD3b, MSPD5b, MSPD7b                                                   |
| F7            | MSPD1c, MSPD1d, MSPD1e                                                                   |
| F8            | MSPD4c, MSPD4d, MSPD4e                                                                   |
| F9            | MSPD9c, MSPD9d, MSPD9e                                                                   |
| F10           | MSPD6c, MSPD6d, MSPD6e                                                                   |
| F11           | SOQ3a, SOQ3b, SOQ3d, SOQ3e                                                               |
| F12           | SOQ2b, SOQ2d, SOQ2e                                                                      |
| F13           | SOQ1b, SOQ1d, SOQ1e                                                                      |
| F14           | -                                                                                        |

Table SF76: Factor Structure and Items: 14 Factors (Oblimin Rotation).

| <b>Factors</b> | <b>Eigenvalues</b> | <b>VAR</b> | <b>CUM</b> |
|----------------|--------------------|------------|------------|
| 1              | 6.5567             | 0.0649     | 0.0649     |
| 2              | 4.7891             | 0.0474     | 0.1123     |
| 3              | 4.6829             | 0.0464     | 0.1587     |
| 4              | 4.4840             | 0.0444     | 0.2031     |
| 5              | 4.4484             | 0.0440     | 0.2471     |
| 6              | 3.1570             | 0.0313     | 0.2784     |
| 7              | 3.0532             | 0.0302     | 0.3086     |
| 8              | 3.0514             | 0.0302     | 0.3388     |
| 9              | 2.8892             | 0.0286     | 0.3674     |
| 10             | 2.8650             | 0.0284     | 0.3958     |
| 11             | 2.7791             | 0.0275     | 0.4233     |
| 12             | 2.7522             | 0.0272     | 0.4506     |
| 13             | 1.2852             | 0.0127     | 0.4633     |

Table SF77: Factors, Eigenvalues, Variance Explained, and Cumulative Variance for 13 Factors (Oblimin Rotation).

| Items  | F1     | F2     | F3     | F4     | F5     | F6     | F7     | F8     | F9     | F10    | F11    | F12    | F13    |
|--------|--------|--------|--------|--------|--------|--------|--------|--------|--------|--------|--------|--------|--------|
| MIQ1   | -0.051 | -0.072 | 0.006  | 0.593  | -0.045 | 0.001  | -0.014 | -0.008 | -0.017 | 0.079  | 0.016  | 0.170  | -0.032 |
| MIQ3   | 0.124  | -0.100 | -0.444 | 0.076  | -0.077 | -0.005 | 0.083  | -0.058 | -0.082 | -0.037 | -0.045 | 0.068  | 0.115  |
| MIQ4   | -0.095 | 0.090  | 0.427  | 0.073  | 0.063  | 0.030  | -0.022 | 0.089  | 0.057  | 0.026  | 0.076  | 0.040  | -0.137 |
| MIQ5   | -0.094 | 0.157  | 0.579  | -0.023 | 0.071  | 0.018  | -0.121 | 0.047  | 0.010  | 0.028  | 0.049  | 0.147  | -0.049 |
| MIQ6   | 0.070  | -0.004 | 0.033  | -0.406 | -0.077 | -0.008 | 0.053  | 0.037  | -0.027 | -0.037 | -0.015 | 0.262  | 0.003  |
| MIQ7   | 0.067  | -0.066 | 0.037  | -0.423 | -0.102 | 0.002  | 0.071  | 0.059  | 0.008  | -0.018 | 0.013  | 0.314  | -0.040 |
| MIQ9   | 0.051  | 0.028  | -0.012 | -0.515 | 0.039  | 0.044  | -0.046 | 0.019  | 0.110  | 0.044  | 0.015  | 0.259  | -0.098 |
| MIQ10  | 0.101  | 0.034  | 0.036  | -0.451 | 0.086  | 0.021  | -0.079 | 0.022  | 0.110  | 0.057  | 0.019  | 0.260  | -0.118 |
| TCS1   | 0.001  | 0.059  | 0.002  | 0.722  | -0.085 | 0.025  | -0.073 | 0.013  | 0.033  | -0.033 | -0.034 | -0.072 | -0.038 |
| TCS2   | 0.001  | 0.002  | 0.026  | 0.827  | -0.053 | -0.010 | -0.013 | 0.000  | -0.029 | -0.054 | -0.018 | -0.038 | 0.011  |
| TCS3   | -0.040 | 0.017  | -0.029 | 0.802  | -0.033 | -0.009 | 0.020  | -0.000 | -0.027 | -0.040 | -0.010 | -0.092 | 0.037  |
| TCS4   | -0.037 | -0.018 | -0.000 | 0.794  | 0.013  | 0.020  | 0.031  | -0.017 | 0.009  | 0.032  | -0.003 | 0.118  | -0.004 |
| TCS5   | 0.037  | -0.059 | 0.010  | 0.728  | 0.036  | -0.018 | -0.028 | 0.055  | 0.061  | 0.123  | 0.023  | 0.074  | -0.093 |
| OSRI1  | 0.072  | 0.183  | 0.118  | 0.000  | -0.071 | 0.034  | -0.061 | 0.050  | -0.052 | 0.014  | -0.005 | 0.170  | -0.011 |
| OSRI2  | 0.135  | -0.005 | -0.142 | 0.129  | -0.057 | -0.036 | 0.026  | -0.060 | 0.053  | 0.038  | 0.041  | 0.241  | 0.035  |
| OSRI3  | 0.047  | 0.005  | -0.044 | -0.141 | 0.100  | 0.037  | 0.070  | 0.128  | 0.098  | 0.064  | -0.033 | 0.072  | -0.078 |
| OSRI4  | 0.103  | 0.020  | -0.062 | 0.007  | -0.011 | 0.037  | 0.045  | 0.035  | -0.026 | -0.007 | 0.015  | 0.077  | 0.012  |
| OSRI5  | -0.083 | 0.122  | 0.154  | 0.051  | 0.032  | 0.010  | -0.145 | -0.093 | -0.082 | -0.024 | 0.046  | -0.076 | -0.026 |
| OSRI6  | 0.041  | 0.166  | 0.206  | 0.017  | -0.039 | 0.087  | 0.007  | -0.017 | -0.044 | 0.003  | 0.018  | 0.190  | -0.027 |
| OSRI7  | 0.169  | -0.077 | -0.208 | 0.125  | -0.107 | -0.000 | 0.034  | -0.052 | 0.060  | -0.039 | -0.033 | 0.142  | 0.060  |
| OSRI8  | 0.080  | 0.108  | 0.212  | 0.029  | -0.065 | 0.080  | -0.056 | 0.026  | -0.117 | -0.052 | -0.030 | 0.039  | -0.088 |
| OSRI9  | 0.139  | 0.025  | -0.080 | -0.104 | -0.013 | 0.039  | 0.064  | 0.035  | -0.007 | 0.033  | -0.060 | 0.149  | 0.051  |
| OSRI10 | 0.001  | 0.190  | 0.044  | -0.082 | 0.046  | 0.006  | 0.006  | 0.051  | -0.044 | -0.005 | -0.038 | 0.077  | -0.027 |
| OSRI11 | 0.122  | 0.084  | -0.117 | -0.008 | 0.037  | 0.058  | 0.046  | -0.011 | 0.025  | -0.022 | -0.058 | 0.229  | 0.053  |
| OSRI12 | 0.102  | -0.055 | -0.202 | 0.061  | -0.090 | 0.075  | 0.067  | 0.011  | 0.005  | -0.122 | 0.076  | 0.178  | 0.063  |
| OSRI13 | 0.025  | 0.178  | 0.286  | 0.069  | -0.053 | -0.006 | -0.097 | 0.027  | -0.041 | -0.025 | 0.110  | 0.192  | 0.001  |
| OSRI14 | 0.124  | 0.041  | -0.140 | 0.189  | -0.107 | 0.025  | 0.021  | -0.009 | -0.045 | -0.067 | 0.055  | 0.152  | 0.040  |
| OSRI15 | 0.070  | 0.237  | 0.234  | 0.016  | -0.046 | -0.017 | -0.059 | 0.040  | -0.051 | -0.016 | 0.029  | 0.158  | 0.014  |
| OSRI16 | 0.150  | -0.007 | -0.235 | 0.175  | -0.111 | 0.051  | 0.036  | -0.066 | 0.032  | -0.093 | -0.013 | 0.180  | 0.113  |
| OSRI17 | 0.017  | 0.166  | 0.177  | 0.044  | -0.011 | 0.002  | -0.015 | 0.013  | -0.034 | -0.005 | -0.010 | 0.054  | -0.009 |
| OSRI18 | 0.123  | -0.028 | -0.132 | 0.037  | -0.056 | 0.025  | 0.075  | -0.020 | 0.068  | -0.055 | 0.032  | 0.288  | 0.062  |
| SOQ1a  | -0.026 | 0.030  | -0.819 | 0.062  | 0.263  | 0.029  | -0.046 | 0.031  | -0.004 | -0.019 | 0.050  | 0.024  | -0.012 |
| SOQ1b  | -0.015 | 0.056  | -0.117 | -0.017 | 0.667  | 0.003  | -0.044 | -0.012 | -0.038 | -0.019 | 0.073  | 0.183  | 0.038  |
| SOQ1c  | -0.034 | 0.050  | 0.671  | 0.109  | 0.391  | 0.006  | -0.038 | 0.020  | -0.035 | -0.054 | 0.044  | 0.026  | 0.020  |

| Items  | F1     | F2     | F3     | F4     | F5     | F6     | F7     | F8     | F9     | F10    | F11    | F12    | F13    |
|--------|--------|--------|--------|--------|--------|--------|--------|--------|--------|--------|--------|--------|--------|
| SOQ1d  | 0.017  | 0.020  | -0.012 | -0.036 | 0.682  | -0.040 | -0.070 | -0.031 | -0.026 | -0.012 | 0.082  | 0.179  | 0.037  |
| SOQ1e  | 0.010  | -0.035 | 0.001  | -0.063 | 0.541  | -0.033 | -0.020 | -0.014 | 0.025  | 0.034  | 0.040  | 0.304  | 0.044  |
| SOQ2a  | 0.031  | -0.002 | -0.816 | 0.067  | -0.012 | 0.023  | -0.016 | 0.011  | 0.006  | 0.005  | 0.012  | 0.216  | -0.004 |
| SOQ2b  | 0.042  | 0.024  | -0.114 | -0.036 | 0.105  | 0.043  | 0.019  | 0.039  | 0.002  | -0.009 | 0.054  | 0.709  | -0.017 |
| SOQ2c  | 0.013  | 0.074  | 0.738  | 0.048  | 0.090  | 0.026  | 0.008  | 0.034  | -0.007 | 0.011  | -0.029 | 0.258  | 0.015  |
| SOQ2d  | 0.030  | -0.019 | 0.100  | -0.103 | 0.120  | -0.013 | 0.048  | -0.005 | 0.054  | 0.018  | 0.042  | 0.694  | 0.034  |
| SOQ2e  | 0.048  | -0.075 | 0.065  | -0.121 | 0.060  | -0.007 | 0.087  | 0.052  | 0.048  | 0.056  | 0.001  | 0.711  | 0.009  |
| SOQ3a  | -0.015 | 0.008  | -0.783 | 0.015  | 0.441  | 0.022  | -0.003 | 0.072  | 0.022  | -0.001 | -0.001 | -0.090 | -0.031 |
| SOQ3b  | 0.019  | 0.008  | -0.093 | -0.042 | 0.910  | 0.037  | 0.040  | 0.007  | 0.016  | 0.001  | -0.010 | -0.024 | -0.013 |
| SOQ3c  | -0.003 | 0.025  | 0.640  | 0.094  | 0.606  | 0.029  | 0.005  | 0.007  | -0.005 | -0.022 | -0.027 | -0.104 | -0.007 |
| SOQ3d  | 0.031  | -0.004 | -0.016 | -0.067 | 0.906  | 0.012  | 0.020  | 0.004  | 0.005  | -0.001 | -0.004 | -0.014 | -0.011 |
| SOQ3e  | 0.042  | -0.055 | 0.008  | -0.086 | 0.787  | -0.014 | 0.050  | 0.000  | 0.039  | 0.068  | -0.051 | 0.114  | -0.002 |
| MSPD1a | 0.039  | 0.721  | 0.036  | -0.024 | -0.016 | -0.027 | -0.046 | 0.125  | 0.010  | -0.038 | -0.055 | 0.010  | -0.042 |
| MSPD1b | 0.020  | 0.025  | -0.027 | -0.084 | 0.009  | -0.002 | 0.521  | 0.295  | -0.035 | -0.037 | -0.009 | 0.126  | -0.022 |
| MSPD1c | 0.037  | -0.027 | -0.007 | 0.005  | -0.010 | 0.043  | 0.059  | 0.815  | 0.089  | 0.082  | -0.013 | 0.047  | -0.104 |
| MSPD1d | 0.024  | 0.022  | -0.015 | 0.011  | -0.022 | 0.059  | 0.008  | 0.869  | -0.035 | 0.017  | 0.046  | -0.041 | -0.002 |
| MSPD1e | 0.047  | 0.048  | -0.006 | -0.007 | -0.012 | 0.045  | 0.032  | 0.712  | -0.030 | 0.024  | 0.046  | 0.056  | 0.193  |
| MSPD2a | -0.010 | 0.778  | -0.014 | -0.030 | 0.011  | 0.015  | -0.065 | 0.069  | -0.092 | 0.005  | -0.011 | -0.007 | 0.027  |
| MSPD2b | 0.032  | -0.065 | -0.002 | -0.054 | 0.013  | 0.023  | 0.631  | 0.202  | 0.083  | 0.018  | 0.047  | 0.064  | -0.004 |
| MSPD2c | 0.014  | -0.096 | -0.009 | -0.051 | 0.026  | -0.011 | 0.091  | 0.355  | 0.331  | 0.103  | 0.123  | 0.030  | 0.107  |
| MSPD2d | 0.024  | -0.059 | -0.014 | -0.058 | 0.021  | -0.004 | 0.064  | 0.406  | 0.275  | 0.079  | 0.129  | -0.040 | 0.183  |
| MSPD2e | 0.033  | -0.048 | -0.006 | -0.047 | 0.025  | 0.006  | 0.067  | 0.311  | 0.198  | 0.104  | 0.136  | 0.031  | 0.359  |
| MSPD3a | -0.009 | 0.782  | 0.008  | 0.021  | -0.028 | -0.003 | 0.008  | 0.015  | -0.041 | -0.062 | -0.047 | 0.009  | 0.068  |
| MSPD3b | 0.040  | -0.042 | 0.029  | 0.037  | 0.020  | -0.015 | 0.617  | 0.152  | 0.139  | 0.085  | 0.055  | 0.013  | 0.054  |
| MSPD3c | -0.012 | -0.091 | 0.031  | -0.013 | 0.000  | 0.077  | 0.096  | 0.207  | 0.379  | 0.092  | 0.157  | 0.044  | 0.172  |
| MSPD3d | 0.025  | -0.049 | 0.032  | -0.020 | -0.011 | 0.089  | 0.014  | 0.223  | 0.303  | 0.058  | 0.201  | -0.003 | 0.270  |
| MSPD3e | 0.030  | -0.038 | 0.008  | -0.019 | -0.003 | 0.080  | 0.034  | 0.121  | 0.237  | 0.124  | 0.171  | 0.050  | 0.462  |
| MSPD4a | -0.023 | 0.763  | -0.001 | 0.023  | 0.002  | 0.016  | 0.021  | -0.066 | 0.144  | -0.052 | -0.086 | 0.007  | 0.050  |
| MSPD4b | 0.086  | 0.056  | -0.035 | -0.023 | 0.001  | 0.027  | 0.511  | -0.007 | 0.406  | 0.021  | 0.024  | 0.095  | -0.069 |
| MSPD4c | 0.050  | 0.003  | -0.012 | -0.011 | 0.008  | 0.060  | 0.042  | 0.033  | 0.819  | 0.040  | 0.085  | 0.016  | -0.040 |
| MSPD4d | 0.051  | 0.020  | -0.008 | -0.029 | -0.006 | 0.057  | 0.003  | 0.044  | 0.811  | 0.047  | 0.090  | -0.001 | -0.005 |
| MSPD4e | 0.056  | 0.002  | -0.006 | -0.030 | -0.004 | 0.060  | 0.026  | -0.010 | 0.641  | 0.030  | 0.092  | 0.066  | 0.261  |
| MSPD5a | -0.038 | 0.763  | 0.024  | -0.027 | -0.012 | -0.028 | 0.062  | 0.014  | 0.133  | 0.072  | -0.035 | -0.045 | -0.037 |
| MSPD5b | 0.100  | 0.121  | 0.018  | -0.040 | 0.055  | 0.030  | 0.619  | 0.023  | 0.031  | -0.008 | 0.014  | 0.011  | 0.170  |
| MSPD5c | 0.024  | 0.012  | 0.045  | -0.034 | 0.039  | 0.072  | 0.054  | 0.237  | 0.297  | 0.221  | 0.107  | -0.053 | 0.190  |

| Items   | F1     | F2     | F3     | F4     | F5     | F6     | F7     | F8     | F9     | F10    | F11    | F12    | F13    |
|---------|--------|--------|--------|--------|--------|--------|--------|--------|--------|--------|--------|--------|--------|
| MSPD5d  | 0.054  | 0.022  | 0.052  | -0.032 | 0.039  | 0.088  | 0.019  | 0.244  | 0.234  | 0.179  | 0.164  | -0.103 | 0.247  |
| MSPD5e  | 0.043  | 0.044  | 0.036  | -0.009 | 0.042  | 0.081  | 0.035  | 0.127  | 0.225  | 0.177  | 0.154  | -0.015 | 0.440  |
| MSPD6a  | 0.013  | 0.731  | -0.001 | -0.014 | 0.009  | 0.024  | 0.006  | -0.097 | -0.091 | -0.122 | 0.167  | -0.025 | -0.022 |
| MSPD6b  | 0.056  | 0.055  | -0.002 | -0.028 | -0.003 | 0.006  | 0.587  | -0.054 | -0.011 | -0.009 | 0.462  | -0.007 | -0.095 |
| MSPD6c  | 0.022  | -0.047 | -0.011 | -0.011 | -0.011 | 0.021  | 0.042  | 0.047  | 0.123  | 0.052  | 0.816  | 0.022  | -0.084 |
| MSPD6d  | 0.039  | -0.018 | 0.002  | -0.009 | -0.013 | 0.031  | -0.014 | 0.052  | 0.068  | 0.040  | 0.859  | -0.017 | -0.017 |
| MSPD6e  | 0.049  | -0.004 | -0.007 | -0.020 | 0.014  | 0.042  | 0.017  | -0.013 | -0.015 | 0.051  | 0.785  | 0.036  | 0.196  |
| MSPD7a  | 0.111  | 0.564  | 0.009  | -0.004 | 0.025  | -0.038 | 0.033  | 0.004  | 0.076  | 0.098  | 0.016  | 0.044  | -0.104 |
| MSPD7b  | 0.012  | 0.066  | 0.015  | -0.067 | -0.006 | 0.152  | 0.544  | 0.018  | -0.026 | -0.039 | 0.048  | 0.024  | 0.057  |
| MSPD7c  | 0.010  | -0.029 | 0.002  | -0.052 | 0.002  | 0.150  | 0.061  | 0.263  | 0.111  | 0.265  | 0.200  | 0.046  | -0.018 |
| MSPD7d  | -0.004 | 0.023  | -0.014 | -0.018 | -0.016 | 0.169  | 0.029  | 0.285  | 0.059  | 0.202  | 0.283  | -0.015 | 0.054  |
| MSPD7e  | 0.003  | 0.015  | -0.012 | -0.046 | 0.009  | 0.195  | 0.060  | 0.177  | 0.010  | 0.194  | 0.219  | 0.024  | 0.270  |
| MSPD8a  | 0.122  | 0.546  | 0.005  | -0.022 | -0.016 | 0.072  | 0.111  | 0.006  | -0.058 | 0.045  | 0.034  | -0.020 | -0.063 |
| MSPD8b  | 0.101  | 0.121  | -0.004 | -0.005 | -0.028 | 0.450  | 0.460  | -0.060 | -0.009 | -0.039 | -0.002 | 0.027  | -0.036 |
| MSPD8c  | 0.007  | -0.035 | 0.008  | -0.008 | 0.006  | 0.949  | -0.001 | 0.012  | 0.012  | 0.030  | -0.019 | -0.007 | -0.061 |
| MSPD8d  | -0.000 | 0.002  | -0.002 | 0.017  | -0.003 | 0.968  | -0.028 | 0.022  | -0.000 | 0.014  | 0.020  | -0.025 | -0.033 |
| MSPD8e  | -0.009 | 0.003  | -0.017 | -0.001 | -0.007 | 0.918  | -0.002 | -0.018 | 0.005  | 0.027  | -0.006 | 0.021  | 0.096  |
| MSPD9a  | 0.102  | 0.546  | -0.060 | 0.051  | 0.004  | -0.100 | 0.105  | -0.118 | -0.088 | 0.316  | -0.018 | -0.030 | 0.012  |
| MSPD9b  | 0.106  | 0.046  | 0.008  | 0.002  | 0.044  | 0.008  | 0.520  | -0.067 | -0.001 | 0.412  | -0.011 | 0.024  | -0.021 |
| MSPD9c  | -0.004 | -0.033 | 0.007  | -0.007 | 0.001  | 0.075  | 0.012  | 0.048  | 0.050  | 0.869  | 0.030  | 0.009  | -0.075 |
| MSPD9d  | 0.020  | 0.002  | 0.000  | 0.006  | -0.004 | 0.074  | -0.027 | 0.049  | 0.008  | 0.859  | 0.059  | -0.030 | -0.007 |
| MSPD9e  | 0.039  | -0.008 | -0.009 | 0.014  | 0.002  | 0.072  | -0.007 | 0.013  | -0.002 | 0.771  | 0.041  | 0.045  | 0.179  |
| MSPD10a | 0.839  | 0.026  | 0.009  | -0.018 | -0.008 | -0.009 | -0.001 | 0.044  | -0.003 | 0.045  | 0.027  | -0.026 | -0.039 |
| MSPD10b | 0.874  | 0.012  | -0.042 | 0.043  | -0.018 | -0.015 | 0.008  | 0.011  | -0.006 | 0.075  | -0.007 | -0.044 | -0.026 |
| MSPD10c | 0.777  | -0.011 | -0.052 | 0.037  | 0.023  | -0.006 | -0.004 | -0.006 | -0.054 | -0.001 | 0.013  | -0.024 | 0.029  |
| MSPD10d | 0.781  | -0.031 | -0.058 | 0.067  | -0.005 | -0.029 | 0.039  | -0.023 | 0.068  | -0.050 | -0.009 | 0.033  | 0.001  |
| MSPD10e | 0.669  | 0.001  | -0.003 | 0.022  | 0.015  | -0.001 | 0.005  | -0.011 | 0.014  | -0.025 | 0.027  | 0.048  | -0.010 |
| MSPD10f | 0.861  | 0.052  | 0.042  | -0.047 | -0.003 | 0.017  | -0.072 | 0.036  | -0.007 | -0.043 | -0.008 | -0.005 | 0.017  |
| MSPD10g | 0.724  | -0.023 | -0.019 | 0.027  | 0.034  | -0.064 | 0.039  | -0.035 | -0.021 | -0.085 | 0.033  | -0.024 | 0.058  |
| MSPD10h | 0.770  | -0.011 | 0.025  | -0.089 | 0.025  | 0.054  | 0.010  | -0.035 | 0.048  | 0.032  | -0.008 | 0.006  | -0.008 |
| MSPD10i | 0.801  | -0.024 | 0.013  | -0.030 | 0.011  | 0.017  | 0.012  | 0.011  | 0.026  | 0.044  | 0.006  | 0.031  | -0.015 |
| MSPD10j | 0.746  | 0.022  | 0.112  | -0.076 | 0.014  | 0.064  | -0.019 | 0.026  | -0.020 | -0.033 | -0.000 | 0.025  | 0.003  |

Table SF78: EFA for Total Sample (Excluding Supplementary Items): 13 Factors Using Oblimin Rotation.

In Table SF79, we listed the items of each factor that exceeded the threshold of 0.40. In Factor 13, we have only two items that have loadings greater than 0.40.

| Factor | Items                                                                                    |
|--------|------------------------------------------------------------------------------------------|
| F1     | MSPD10a, MSPD10b, MSPD10c, MSPD10d, MSPD10e, MSPD10f, MSPD10g, MSPD10h, MSPD10i, MSPD10j |
| F2     | MSPD1a, MSPD2a, MSPD3a, MSPD4a, MSPD5a, MSPD6a, MSPD7a, MSPD8a, MSPD9a                   |
| F3     | MIQ4, MIQ5, SOQ1c, SOQ2c                                                                 |
| F4     | MIQ1, TCS1, TCS2, TCS3, TCS4, TCS5                                                       |
| F5     | SOQ1b, SOQ1d, SOQ1e, SOQ3a, SOQ3b, SOQ3d, SOQ3e                                          |
| F6     | MSPD8c, MSPD8d, MSPD8e                                                                   |
| F7     | MSPD1b, MSPD2b, MSPD3b, MSPD5b, MSPD7b                                                   |
| F8     | MSPD1c, MSPD1d, MSPD1e                                                                   |
| F9     | MSPD4c, MSPD4d, MSPD4e                                                                   |
| F10    | MSPD9c, MSPD9d, MSPD9e                                                                   |
| F11    | MSPD6c, MSPD6d, MSPD6e                                                                   |
| F12    | SOQ2b, SOQ2d, SOQ2e                                                                      |
| F13    | MSPD3e, MSPD5e                                                                           |

Table SF79: Factor Structure and Items: 13 Factors (Oblimin Rotation).

| Factors | Eigenvalues | VAR    | CUM    |
|---------|-------------|--------|--------|
| 1       | 6.5595      | 0.0683 | 0.0683 |
| 2       | 4.8154      | 0.0502 | 0.1185 |
| 3       | 4.7437      | 0.0494 | 0.1679 |
| 4       | 4.4385      | 0.0462 | 0.2141 |
| 5       | 3.1809      | 0.0331 | 0.2473 |
| 6       | 3.1608      | 0.0329 | 0.2802 |
| 7       | 3.0390      | 0.0317 | 0.3119 |
| 8       | 3.0015      | 0.0313 | 0.3431 |
| 9       | 2.8176      | 0.0293 | 0.3725 |
| 10      | 2.8084      | 0.0293 | 0.4017 |
| 11      | 2.7766      | 0.0289 | 0.4306 |
| 12      | 2.2223      | 0.0231 | 0.4538 |
| 13      | 1.0546      | 0.0110 | 0.4648 |

Table SF80: Factors, Eigenvalues, Variance Explained, and Cumulative Variance for 13 Factors excluding Cross-loadings (Oblimin Rotation).

| Items  | F1     | F2     | F3     | F4     | F5     | F6     | F7     | F8     | F9     | F10    | F11    | F12    | F13    |
|--------|--------|--------|--------|--------|--------|--------|--------|--------|--------|--------|--------|--------|--------|
| MIQ1   | -0.057 | -0.069 | 0.008  | 0.595  | -0.015 | -0.032 | 0.016  | 0.000  | 0.166  | 0.081  | -0.042 | 0.007  | -0.034 |
| MIQ3   | 0.123  | -0.078 | -0.451 | 0.096  | -0.040 | -0.079 | -0.012 | -0.003 | 0.135  | -0.049 | 0.033  | -0.151 | 0.115  |
| MIQ4   | -0.085 | 0.080  | 0.433  | 0.056  | 0.080  | 0.061  | 0.055  | 0.029  | -0.021 | 0.031  | -0.065 | 0.176  | -0.147 |
| MIQ5   | -0.109 | 0.130  | 0.591  | -0.042 | 0.027  | -0.003 | 0.012  | 0.019  | 0.077  | 0.041  | -0.046 | 0.174  | -0.048 |
| MIQ6   | 0.070  | 0.007  | 0.024  | -0.399 | 0.046  | -0.023 | -0.002 | -0.006 | 0.274  | -0.040 | -0.057 | -0.019 | 0.000  |
| MIQ7   | 0.072  | -0.052 | 0.030  | -0.415 | 0.068  | 0.011  | 0.031  | 0.004  | 0.326  | -0.022 | -0.087 | -0.010 | -0.048 |
| MIQ9   | 0.038  | 0.017  | -0.007 | -0.516 | 0.009  | 0.100  | 0.006  | 0.046  | 0.234  | 0.044  | 0.022  | 0.044  | -0.099 |
| MIQ10  | 0.087  | 0.015  | 0.049  | -0.456 | 0.010  | 0.097  | 0.002  | 0.021  | 0.217  | 0.059  | 0.026  | 0.107  | -0.123 |
| TCS1   | -0.006 | 0.043  | 0.014  | 0.708  | 0.001  | 0.026  | -0.058 | 0.026  | -0.108 | -0.031 | -0.105 | 0.028  | -0.038 |
| TCS2   | 0.001  | -0.002 | 0.032  | 0.818  | -0.000 | -0.029 | -0.025 | -0.009 | -0.053 | -0.057 | -0.062 | 0.013  | 0.012  |
| TCS3   | -0.035 | 0.023  | -0.027 | 0.799  | 0.002  | -0.019 | -0.010 | -0.010 | -0.089 | -0.043 | -0.032 | -0.007 | 0.035  |
| TCS4   | -0.041 | -0.004 | -0.002 | 0.803  | -0.022 | 0.004  | 0.007  | 0.020  | 0.139  | 0.027  | 0.048  | -0.041 | -0.004 |
| TCS5   | 0.023  | -0.055 | 0.009  | 0.731  | 0.040  | 0.042  | 0.022  | -0.022 | 0.075  | 0.122  | 0.067  | -0.034 | -0.089 |
| OSRI1  | 0.068  | 0.162  | 0.129  | -0.016 | 0.047  | -0.062 | -0.028 | 0.037  | 0.113  | 0.020  | -0.139 | 0.109  | -0.010 |
| OSRI2  | 0.130  | 0.002  | -0.142 | 0.132  | -0.062 | 0.047  | 0.056  | -0.034 | 0.248  | 0.036  | -0.022 | -0.032 | 0.034  |
| OSRI3  | 0.051  | 0.021  | -0.054 | -0.137 | 0.136  | 0.104  | -0.022 | 0.037  | 0.089  | 0.058  | 0.106  | -0.010 | -0.084 |
| OSRI4  | 0.104  | 0.033  | -0.067 | 0.013  | 0.038  | -0.025 | 0.036  | 0.036  | 0.094  | -0.013 | 0.016  | -0.035 | 0.005  |
| OSRI5  | -0.099 | 0.095  | 0.166  | 0.038  | -0.122 | -0.104 | 0.026  | 0.011  | -0.125 | -0.016 | -0.016 | 0.073  | -0.019 |
| OSRI6  | 0.047  | 0.164  | 0.210  | 0.008  | -0.015 | -0.046 | 0.012  | 0.092  | 0.158  | 0.002  | -0.087 | 0.076  | -0.027 |
| OSRI7  | 0.172  | -0.070 | -0.209 | 0.128  | -0.042 | 0.074  | -0.033 | 0.002  | 0.149  | -0.042 | -0.086 | -0.027 | 0.054  |
| OSRI8  | 0.076  | 0.099  | 0.215  | 0.018  | 0.023  | -0.135 | -0.040 | 0.083  | 0.006  | -0.052 | -0.074 | 0.015  | -0.081 |
| OSRI9  | 0.141  | 0.039  | -0.091 | -0.100 | 0.047  | -0.006 | -0.046 | 0.041  | 0.172  | 0.032  | 0.037  | -0.064 | 0.054  |
| OSRI10 | 0.011  | 0.186  | 0.048  | -0.091 | 0.057  | -0.039 | -0.051 | 0.009  | 0.046  | -0.003 | -0.018 | 0.100  | -0.031 |
| OSRI11 | 0.121  | 0.094  | -0.122 | -0.004 | -0.003 | 0.029  | -0.052 | 0.062  | 0.242  | -0.023 | 0.055  | -0.013 | 0.053  |
| OSRI12 | 0.102  | -0.039 | -0.207 | 0.067  | 0.024  | 0.010  | 0.101  | 0.077  | 0.199  | -0.134 | -0.048 | -0.057 | 0.056  |
| OSRI13 | 0.010  | 0.156  | 0.297  | 0.053  | 0.010  | -0.058 | 0.095  | -0.004 | 0.126  | -0.018 | -0.124 | 0.118  | -0.007 |
| OSRI14 | 0.118  | 0.049  | -0.141 | 0.192  | -0.007 | -0.050 | 0.070  | 0.023  | 0.161  | -0.070 | -0.064 | -0.052 | 0.040  |
| OSRI15 | 0.060  | 0.220  | 0.240  | 0.001  | 0.032  | -0.063 | 0.013  | -0.015 | 0.113  | -0.010 | -0.080 | 0.063  | 0.018  |
| OSRI16 | 0.143  | 0.004  | -0.238 | 0.183  | -0.062 | 0.037  | -0.000 | 0.054  | 0.207  | -0.097 | -0.036 | -0.095 | 0.112  |
| OSRI17 | 0.016  | 0.161  | 0.177  | 0.034  | 0.013  | -0.035 | -0.019 | 0.004  | 0.028  | -0.005 | -0.039 | 0.039  | -0.007 |
| OSRI18 | 0.119  | -0.010 | -0.138 | 0.048  | -0.009 | 0.072  | 0.054  | 0.027  | 0.316  | -0.065 | -0.008 | -0.057 | 0.057  |
| SOQ1a  | -0.013 | 0.007  | -0.813 | 0.043  | 0.032  | 0.010  | 0.015  | 0.029  | -0.064 | -0.007 | -0.008 | 0.399  | -0.028 |
| SOQ1b  | 0.028  | 0.014  | -0.072 | -0.042 | -0.001 | 0.008  | 0.002  | 0.008  | 0.031  | 0.004  | 0.084  | 0.871  | 0.003  |
| SOQ1c  | -0.013 | 0.028  | 0.697  | 0.094  | 0.031  | -0.017 | 0.012  | 0.006  | -0.057 | -0.047 | 0.113  | 0.404  | 0.002  |

| Items  | F1     | F2     | F3     | F4     | F5     | F6     | F7     | F8     | F9     | F10    | F11    | F12    | F13    |
|--------|--------|--------|--------|--------|--------|--------|--------|--------|--------|--------|--------|--------|--------|
| SOQ1d  | 0.042  | -0.020 | 0.030  | -0.053 | -0.032 | -0.004 | 0.033  | -0.038 | 0.061  | 0.006  | 0.255  | 0.669  | 0.012  |
| SOQ1e  | 0.034  | -0.063 | 0.038  | -0.071 | -0.006 | 0.056  | -0.004 | -0.029 | 0.225  | 0.050  | 0.139  | 0.598  | 0.012  |
| SOQ2a  | 0.023  | -0.010 | -0.807 | 0.064  | 0.004  | -0.003 | 0.009  | 0.026  | 0.200  | 0.006  | -0.027 | 0.040  | -0.002 |
| SOQ2b  | 0.033  | 0.024  | -0.104 | -0.038 | 0.034  | -0.004 | 0.049  | 0.052  | 0.679  | -0.006 | -0.007 | 0.194  | -0.022 |
| SOQ2c  | 0.001  | 0.085  | 0.724  | 0.050  | 0.034  | -0.011 | -0.027 | 0.028  | 0.264  | 0.013  | 0.088  | 0.009  | 0.014  |
| SOQ2d  | 0.011  | -0.004 | 0.094  | -0.090 | -0.007 | 0.042  | 0.061  | -0.007 | 0.716  | 0.015  | 0.128  | 0.035  | 0.032  |
| SOQ2e  | 0.033  | -0.053 | 0.058  | -0.104 | 0.059  | 0.041  | 0.022  | -0.001 | 0.757  | 0.052  | 0.066  | 0.015  | 0.002  |
| SOQ3a  | -0.030 | 0.014  | -0.800 | 0.014  | 0.066  | 0.008  | 0.012  | 0.019  | -0.077 | -0.002 | 0.414  | 0.045  | -0.023 |
| SOQ3b  | 0.013  | 0.025  | -0.101 | -0.036 | 0.008  | 0.012  | 0.009  | 0.038  | 0.009  | -0.005 | 0.792  | 0.183  | -0.006 |
| SOQ3c  | -0.009 | 0.037  | 0.632  | 0.096  | 0.009  | -0.014 | -0.012 | 0.028  | -0.085 | -0.028 | 0.567  | 0.057  | 0.001  |
| SOQ3d  | 0.013  | 0.012  | -0.027 | -0.054 | -0.002 | -0.017 | 0.029  | 0.011  | 0.036  | -0.011 | 0.901  | 0.055  | 0.005  |
| SOQ3e  | 0.030  | -0.035 | 0.000  | -0.069 | 0.003  | 0.033  | -0.028 | -0.013 | 0.176  | 0.062  | 0.738  | 0.086  | 0.002  |
| MSPD1a | 0.026  | 0.706  | 0.043  | -0.031 | 0.116  | -0.006 | -0.071 | -0.024 | -0.011 | -0.038 | -0.021 | 0.017  | -0.033 |
| MSPD1b | 0.109  | 0.112  | -0.064 | -0.063 | 0.383  | 0.049  | 0.071  | -0.005 | 0.217  | -0.072 | 0.016  | -0.037 | -0.048 |
| MSPD1c | 0.028  | -0.038 | -0.004 | 0.003  | 0.858  | 0.086  | -0.023 | 0.030  | 0.039  | 0.068  | 0.004  | -0.012 | -0.114 |
| MSPD1d | 0.004  | -0.001 | -0.007 | 0.004  | 0.882  | -0.043 | 0.036  | 0.049  | -0.058 | 0.016  | -0.009 | -0.009 | 0.001  |
| MSPD1e | 0.034  | 0.027  | 0.002  | -0.014 | 0.757  | -0.028 | 0.034  | 0.034  | 0.036  | 0.020  | -0.008 | 0.011  | 0.195  |
| MSPD2a | -0.024 | 0.763  | -0.004 | -0.033 | 0.053  | -0.111 | -0.024 | 0.020  | -0.028 | 0.009  | -0.019 | 0.055  | 0.028  |
| MSPD2b | 0.137  | 0.055  | -0.053 | -0.026 | 0.288  | 0.197  | 0.153  | 0.023  | 0.186  | -0.025 | 0.025  | -0.061 | -0.054 |
| MSPD2c | 0.011  | -0.080 | -0.013 | -0.039 | 0.337  | 0.378  | 0.143  | -0.015 | 0.051  | 0.102  | 0.013  | 0.014  | 0.048  |
| MSPD2e | 0.028  | -0.044 | -0.004 | -0.040 | 0.308  | 0.247  | 0.147  | 0.002  | 0.038  | 0.112  | -0.002 | 0.040  | 0.306  |
| MSPD3a | -0.014 | 0.780  | 0.012  | 0.022  | 0.014  | -0.048 | -0.046 | 0.002  | 0.013  | -0.065 | -0.016 | -0.011 | 0.069  |
| MSPD3b | 0.144  | 0.073  | -0.021 | 0.059  | 0.246  | 0.257  | 0.149  | -0.018 | 0.130  | 0.045  | 0.022  | -0.051 | 0.004  |
| MSPD3c | -0.011 | -0.073 | 0.025  | -0.005 | 0.212  | 0.430  | 0.172  | 0.069  | 0.056  | 0.084  | -0.017 | 0.020  | 0.119  |
| MSPD3d | 0.007  | -0.048 | 0.032  | -0.016 | 0.209  | 0.337  | 0.210  | 0.082  | 0.000  | 0.061  | -0.015 | 0.006  | 0.225  |
| MSPD3e | 0.022  | -0.041 | 0.011  | -0.018 | 0.137  | 0.284  | 0.173  | 0.071  | 0.042  | 0.128  | -0.028 | 0.041  | 0.420  |
| MSPD4a | -0.021 | 0.761  | 0.002  | 0.022  | -0.067 | 0.148  | -0.095 | 0.021  | 0.006  | -0.052 | 0.003  | 0.007  | 0.052  |
| MSPD4c | 0.047  | 0.005  | -0.011 | -0.009 | 0.018  | 0.869  | 0.064  | 0.054  | 0.011  | 0.028  | 0.008  | -0.000 | -0.070 |
| MSPD4d | 0.041  | 0.013  | -0.004 | -0.030 | 0.023  | 0.847  | 0.065  | 0.049  | -0.015 | 0.044  | -0.003 | -0.000 | -0.027 |
| MSPD4e | 0.053  | -0.007 | 0.000  | -0.033 | -0.009 | 0.693  | 0.066  | 0.054  | 0.049  | 0.032  | -0.027 | 0.040  | 0.239  |
| MSPD5a | -0.039 | 0.781  | 0.013  | -0.021 | 0.012  | 0.137  | -0.027 | -0.028 | -0.018 | 0.066  | 0.044  | -0.077 | -0.039 |
| MSPD5b | 0.201  | 0.233  | -0.035 | -0.011 | 0.133  | 0.141  | 0.115  | 0.028  | 0.148  | -0.050 | 0.103  | -0.109 | 0.131  |
| MSPD5c | 0.015  | 0.021  | 0.037  | -0.029 | 0.245  | 0.325  | 0.111  | 0.060  | -0.036 | 0.220  | 0.063  | -0.036 | 0.169  |
| MSPD5d | 0.036  | 0.026  | 0.046  | -0.028 | 0.239  | 0.257  | 0.168  | 0.076  | -0.087 | 0.184  | 0.068  | -0.042 | 0.231  |
| MSPD5e | 0.033  | 0.044  | 0.034  | -0.009 | 0.147  | 0.258  | 0.154  | 0.069  | -0.013 | 0.183  | 0.043  | 0.004  | 0.423  |

| Items   | F1     | F2     | F3     | F4     | F5     | F6     | F7     | F8     | F9     | F10    | F11    | F12    | F13    |
|---------|--------|--------|--------|--------|--------|--------|--------|--------|--------|--------|--------|--------|--------|
| MSPD6a  | 0.013  | 0.732  | 0.004  | -0.011 | -0.103 | -0.109 | 0.179  | 0.028  | -0.025 | -0.131 | 0.005  | 0.013  | -0.016 |
| MSPD6c  | 0.007  | -0.027 | -0.010 | -0.002 | 0.022  | 0.091  | 0.898  | 0.007  | 0.026  | 0.020  | 0.004  | -0.019 | -0.111 |
| MSPD6d  | 0.015  | -0.011 | 0.009  | -0.004 | 0.011  | 0.028  | 0.934  | 0.016  | -0.027 | 0.019  | -0.009 | 0.001  | -0.038 |
| MSPD6e  | 0.034  | 0.004  | -0.001 | -0.017 | -0.023 | -0.040 | 0.854  | 0.027  | 0.026  | 0.032  | 0.005  | 0.021  | 0.176  |
| MSPD7a  | 0.112  | 0.575  | 0.007  | -0.000 | -0.006 | 0.073  | 0.018  | -0.035 | 0.051  | 0.096  | 0.013  | 0.018  | -0.108 |
| MSPD7b  | 0.106  | 0.166  | -0.029 | -0.038 | 0.110  | 0.065  | 0.143  | 0.149  | 0.143  | -0.083 | 0.043  | -0.105 | 0.023  |
| MSPD7c  | 0.011  | -0.015 | -0.002 | -0.047 | 0.262  | 0.117  | 0.219  | 0.141  | 0.052  | 0.259  | 0.004  | -0.005 | -0.041 |
| MSPD7d  | -0.011 | 0.030  | -0.014 | -0.016 | 0.273  | 0.060  | 0.306  | 0.158  | -0.018 | 0.199  | -0.020 | 0.005  | 0.031  |
| MSPD7e  | 0.007  | 0.022  | -0.011 | -0.046 | 0.192  | 0.030  | 0.235  | 0.186  | 0.020  | 0.194  | -0.015 | 0.033  | 0.246  |
| MSPD8a  | 0.135  | 0.571  | -0.006 | -0.015 | 0.013  | -0.053 | 0.062  | 0.070  | 0.010  | 0.033  | 0.011  | -0.047 | -0.071 |
| MSPD8c  | 0.011  | -0.023 | 0.006  | -0.006 | 0.001  | 0.006  | -0.022 | 0.965  | 0.001  | 0.014  | 0.015  | -0.021 | -0.065 |
| MSPD8d  | -0.001 | 0.008  | -0.000 | 0.017  | 0.003  | -0.012 | 0.016  | 0.981  | -0.027 | 0.002  | 0.003  | -0.012 | -0.034 |
| MSPD8e  | -0.002 | 0.008  | -0.013 | -0.002 | -0.021 | 0.007  | -0.013 | 0.931  | 0.017  | 0.016  | -0.017 | 0.013  | 0.090  |
| MSPD9a  | 0.122  | 0.567  | -0.065 | 0.058  | -0.107 | -0.073 | 0.001  | -0.099 | -0.004 | 0.304  | 0.012  | -0.017 | 0.002  |
| MSPD9c  | 0.004  | -0.021 | 0.003  | -0.004 | 0.034  | 0.045  | 0.023  | 0.058  | 0.013  | 0.887  | 0.006  | -0.010 | -0.089 |
| MSPD9d  | 0.020  | 0.004  | -0.000 | 0.006  | 0.025  | -0.003 | 0.047  | 0.055  | -0.035 | 0.887  | 0.000  | -0.004 | -0.014 |
| MSPD9e  | 0.045  | -0.010 | -0.005 | 0.011  | 0.012  | 0.002  | 0.023  | 0.055  | 0.030  | 0.798  | -0.020 | 0.039  | 0.169  |
| MSPD10a | 0.830  | 0.032  | 0.009  | -0.017 | 0.036  | -0.008 | 0.036  | -0.005 | -0.016 | 0.048  | 0.015  | -0.036 | -0.042 |
| MSPD10b | 0.871  | 0.018  | -0.042 | 0.043  | 0.007  | -0.008 | 0.000  | -0.013 | -0.035 | 0.082  | 0.002  | -0.033 | -0.027 |
| MSPD10c | 0.778  | -0.013 | -0.047 | 0.033  | -0.002 | -0.051 | 0.012  | -0.002 | -0.031 | 0.004  | -0.011 | 0.046  | 0.026  |
| MSPD10d | 0.790  | -0.030 | -0.054 | 0.062  | -0.011 | 0.079  | -0.014 | -0.025 | 0.025  | -0.047 | -0.035 | 0.041  | 0.004  |
| MSPD10e | 0.672  | -0.002 | 0.002  | 0.015  | -0.004 | 0.014  | 0.019  | 0.003  | 0.031  | -0.022 | -0.021 | 0.054  | -0.004 |
| MSPD10f | 0.842  | 0.037  | 0.051  | -0.055 | 0.026  | -0.015 | -0.023 | 0.021  | -0.024 | -0.032 | -0.010 | 0.014  | 0.022  |
| MSPD10g | 0.730  | -0.019 | -0.019 | 0.025  | -0.020 | -0.010 | 0.038  | -0.061 | -0.020 | -0.083 | 0.028  | 0.007  | 0.062  |
| MSPD10h | 0.765  | -0.004 | 0.021  | -0.089 | -0.039 | 0.055  | -0.004 | 0.058  | 0.014  | 0.035  | 0.045  | -0.032 | -0.012 |
| MSPD10i | 0.801  | -0.021 | 0.017  | -0.032 | 0.013  | 0.032  | 0.006  | 0.021  | 0.027  | 0.047  | -0.005 | 0.021  | -0.022 |
| MSPD10j | 0.738  | 0.018  | 0.115  | -0.081 | 0.023  | -0.018 | -0.004 | 0.068  | 0.015  | -0.029 | 0.005  | 0.014  | 0.002  |

Table SF81: EFA for Total Sample (Excluding Supplementary Items): 13 Factors excluding Cross-loadings Using Oblimin Rotation.

In Table SF82, we listed the items of each factor that exceeded the threshold of 0.40 excluding the items that exhibited cross-loadings.

| Factor | Items                                                                                    |
|--------|------------------------------------------------------------------------------------------|
| F1     | MSPD10a, MSPD10b, MSPD10c, MSPD10d, MSPD10e, MSPD10f, MSPD10g, MSPD10h, MSPD10i, MSPD10j |
| F2     | MSPD1a, MSPD2a, MSPD3a, MSPD4a, MSPD5a, MSPD6a, MSPD7a, MSPD8a, MSPD9a                   |
| F3     | MIQ4, MIQ5, SOQ1c, SOQ2c                                                                 |
| F4     | MIQ1, TCS1, TCS2, TCS3, TCS4, TCS5                                                       |
| F5     | MSPD1c, MSPD1d, MSPD1e                                                                   |
| F6     | MSPD4c, MSPD4d, MSPD4e                                                                   |
| F7     | MSPD6c, MSPD6d, MSPD6e                                                                   |
| F8     | MSPD8c, MSPD8d, MSPD8e                                                                   |
| F9     | SOQ2b, SOQ2d, SOQ2e                                                                      |
| F10    | MSPD9c, MSPD9d, MSPD9e                                                                   |
| F11    | SOQ3a, SOQ3b, SOQ3d, SOQ3e                                                               |
| F12    | SOQ1a, SOQ1b, SOQ1d, SOQ1e                                                               |
| F13    | MSPD3e, MSPD5e                                                                           |

Table SF82: Factor Structure and Items: 13 Factors excluding Cross-loadings (Oblimin Rotation).

The results of the factor analysis, in Tables SF64, SF67, SF70, SF73, SF76 and SF82 document a hierarchical reduction in the number of factors, starting with 18 factors as suggested by the EKC and progressing to 13 factors as indicated by the PA. This reduction highlights changes in the grouping of items and the redistribution of item clusters across factors. The first two factors, Factor 1 and Factor 2, remain stable through all stages. Factor 1 consistently includes the MSPD10 items, while Factor 2 includes MSPD1a to MSPD9a, reflecting stable underlying constructs that do not shift despite the reduction in the number of factors. In contrast, the MIQ and SOQ items, initially spread across factors such as Factor 3 and Factor 4, are redistributed. For example, MIQ1 alternates between Factor 3 and Factor 4, and other MIQ and SOQ items are reassigned to different factors as the structure is simplified. MSPD items are spread across several factors in the 18-factor solution, such as Factor 5 to Factor 17, but these groups begin to consolidate in the 13-factor model. For example, MSPD8c through MSPD8e consistently cluster together as Factor 5 in the later stages, while other MSPD items, such as MSPD1c through MSPD1e, merge with MSPD2c through MSPD2e in reduced solutions. SOQ items also show a similar pattern, forming stable clusters as factors are reduced. For example, SOQ3 items remain grouped across different levels, while SOQ1 and SOQ2 items consistently form separate factors.

The progression from 18 to 13 factors reflects a shift from a more granular representation of constructs, where finer distinctions between variables are maintained, to a more consolidated structure that facilitates interpretation. While the 18-factor model provides greater detail, the 13-factor solution offers a more compact representation of the data. This hierarchical approach highlights the trade-offs involved in balancing interpretive simplicity with the need to retain theoretical nuance and specificity.

Table SF83 presents the inter-correlations among the 13 factors, illustrating their relationships. We identify strong positive correlations between Factor 1 and Factor 8 (0.607). Moderate correlations, such as between Factor 2 and Factor 6 (0.554), suggest meaningful but less pronounced associations. Some factors, like Factor 5, show weak correlations, indicating relative independence. Negative relationships are also notable, particularly for Factor 7, which inversely correlates with Factor 4 (-0.312) and Factor 12 (-0.352).

|     | F1    | F2    | F3    | F4    | F5     | F6    | F7     | F8     | F9     | F10    | F11    | F12    | F13    |
|-----|-------|-------|-------|-------|--------|-------|--------|--------|--------|--------|--------|--------|--------|
| F1  | 1.000 | 0.377 | 0.069 | 0.319 | -0.023 | 0.509 | -0.225 | 0.607  | 0.555  | -0.095 | 0.370  | 0.205  | 0.326  |
| F2  |       | 1.000 | 0.068 | 0.262 | -0.009 | 0.554 | -0.092 | 0.420  | 0.443  | 0.034  | 0.248  | 0.083  | 0.184  |
| F3  |       |       | 1.000 | 0.069 | 0.017  | 0.060 | -0.164 | 0.082  | 0.082  | 0.060  | 0.028  | 0.242  | 0.011  |
| F4  |       |       |       | 1.000 | -0.091 | 0.288 | -0.312 | 0.346  | 0.225  | 0.195  | 0.398  | 0.285  | 0.115  |
| F5  |       |       |       |       | 1.000  | 0.005 | -0.014 | -0.030 | 0.010  | 0.176  | -0.051 | 0.022  | -0.009 |
| F6  |       |       |       |       |        | 1.000 | -0.082 | 0.506  | 0.526  | -0.063 | 0.265  | 0.124  | 0.220  |
| F7  |       |       |       |       |        |       | 1.000  | -0.170 | -0.159 | -0.012 | -0.178 | -0.352 | -0.030 |
| F8  |       |       |       |       |        |       |        | 1.000  | 0.486  | -0.072 | 0.365  | 0.181  | 0.345  |
| F9  |       |       |       |       |        |       |        |        | 1.000  | -0.070 | 0.274  | 0.149  | 0.321  |
| F10 |       |       |       |       |        |       |        |        |        | 1.000  | 0.132  | -0.039 | -0.040 |
| F11 |       |       |       |       |        |       |        |        |        |        | 1.000  | 0.187  | 0.092  |
| F12 |       |       |       |       |        |       |        |        |        |        |        | 1.000  | 0.052  |
| F13 |       |       |       |       |        |       |        |        |        |        |        |        | 1.000  |

Table SF83: Correlation Matrix of Factors from EFA (13 Factors, Oblimin Rotation).

Table SF84 displays the Cronbach's Alpha values for each factor, along with the impact of removing individual items on the reliability of the factors. For Factor 1, the Cronbach's Alpha of 0.9434 indicates excellent internal consistency. Removal of any single item caused a slight decrease in Alpha (see in brackets), with MSPD10a having the most significant impact (0.9353). For Factor 2, the Alpha of 0.8942 is acceptable, with MSPD5a and MSPD2a reducing the reliability most when removed. Factor 3 has a lower Alpha of 0.8327, and removing SOQ1c caused the largest drop to 0.7662. Factor 4 shows good reliability (Alpha = 0.8814), with TCS1 causing the largest drop in Alpha when removed. Factor 5 (0.8793) sees a significant increase in Alpha (0.9049) when SOQ3a is removed. For Factor 6, Alpha (0.9045) dramatically increases to 0.9708 when MSPD8b is removed, indicating that this item is less aligned with the others. Factor 7 has high internal consistency (0.9159), with MSPD9b being the most important item for maintaining reliability. Factor 8 (0.9198) benefits from the removal of MSPD2d, increasing Alpha to 0.9293. Factor 9 (0.9285) sees the largest increase when MSPD4b is removed (0.9590). For Factor 10, Alpha is 0.8939, with the removal of MSPD9b increasing Alpha to 0.9587. Factor 11 (0.9227) shows the highest increase in Alpha when MSPD6b is removed. Factor 12 has an Alpha of 0.8850, with SOQ2d causing the most significant decrease in reliability. Factor 13, with only two items, has an Alpha of 0.8806, reflecting the correlation between the two items. The Composite Cronbach's Alpha for the entire scale is 0.9365.

| Factor   | Cronbach's Alpha | Item Removed |
|----------|------------------|--------------|
| Factor 1 | 0.9434           | -            |
| Factor 1 | 0.9353           | MSPD10a      |
| Factor 1 | 0.9348           | MSPD10b      |
| Factor 1 | 0.9387           | MSPD10c      |
| Factor 1 | 0.9368           | MSPD10d      |
| Factor 1 | 0.9418           | MSPD10e      |
| Factor 1 | 0.9352           | MSPD10f      |
| Factor 1 | 0.9408           | MSPD10g      |
| Factor 1 | 0.9365           | MSPD10h      |
| Factor 1 | 0.9355           | MSPD10i      |
| Factor 1 | 0.9391           | MSPD10j      |
| Factor 2 | 0.8942           | -            |
| Factor 2 | 0.8813           | MSPD1a       |
| Factor 2 | 0.8774           | MSPD2a       |
| Factor 2 | 0.8784           | MSPD3a       |
| Factor 2 | 0.8804           | MSPD4a       |
| Factor 2 | 0.8772           | MSPD5a       |
| Factor 2 | 0.8816           | MSPD6a       |
| Factor 2 | 0.8883           | MSPD7a       |
| Factor 2 | 0.8867           | MSPD8a       |
| Factor 2 | 0.8916           | MSPD9a       |
| Factor 3 | 0.8327           | -            |

| <b>Factor</b> | <b>Cronbach's Alpha</b> | <b>Item Removed</b> |
|---------------|-------------------------|---------------------|
| Factor 3      | 0.8418                  | MIQ4                |
| Factor 3      | 0.8120                  | MIQ5                |
| Factor 3      | 0.7662                  | SOQ1c               |
| Factor 3      | 0.7849                  | SOQ2c               |
| Factor 3      | 0.7746                  | SOQ3c               |
| Factor 4      | 0.8814                  | -                   |
| Factor 4      | 0.8841                  | MIQ1                |
| Factor 4      | 0.8579                  | TCS1                |
| Factor 4      | 0.8395                  | TCS2                |
| Factor 4      | 0.8472                  | TCS3                |
| Factor 4      | 0.8562                  | TCS4                |
| Factor 4      | 0.8732                  | TCS5                |
| Factor 5      | 0.8793                  | -                   |
| Factor 5      | 0.8568                  | SOQ1b               |
| Factor 5      | 0.8554                  | SOQ1d               |
| Factor 5      | 0.8623                  | SOQ1e               |
| Factor 5      | 0.9049                  | SOQ3a               |
| Factor 5      | 0.8407                  | SOQ3b               |
| Factor 5      | 0.8974                  | SOQ3c               |
| Factor 5      | 0.8409                  | SOQ3d               |
| Factor 5      | 0.8457                  | SOQ3e               |
| Factor 6      | 0.9599                  | -                   |
| Factor 6      | 0.9567                  | MSPD1c              |
| Factor 6      | 0.9577                  | MSPD1d              |
| Factor 6      | 0.9570                  | MSPD1e              |
| Factor 6      | 0.9545                  | MSPD2c              |
| Factor 6      | 0.9535                  | MSPD2d              |
| Factor 6      | 0.9537                  | MSPD2e              |
| Factor 6      | 0.9555                  | MSPD3d              |
| Factor 6      | 0.9556                  | MSPD3e              |
| Factor 6      | 0.9560                  | MSPD5d              |
| Factor 6      | 0.9560                  | MSPD5e              |
| Factor 7      | 0.9045                  | -                   |
| Factor 7      | 0.9708                  | MSPD8b              |
| Factor 7      | 0.8406                  | MSPD8c              |
| Factor 7      | 0.8344                  | MSPD8d              |
| Factor 7      | 0.8428                  | MSPD8e              |
| Factor 8      | 0.9159                  | -                   |
| Factor 8      | 0.9110                  | MSPD1b              |
| Factor 8      | 0.9009                  | MSPD2b              |
| Factor 8      | 0.9025                  | MSPD3b              |
| Factor 8      | 0.9015                  | MSPD4b              |
| Factor 8      | 0.9054                  | MSPD5b              |
| Factor 8      | 0.9028                  | MSPD6b              |
| Factor 8      | 0.9120                  | MSPD7b              |
| Factor 8      | 0.9121                  | MSPD8b              |
| Factor 8      | 0.9081                  | MSPD9b              |
| Factor 9      | 0.9587                  | -                   |
| Factor 9      | 0.9296                  | MSPD9c              |
| Factor 9      | 0.9247                  | MSPD9d              |
| Factor 9      | 0.9635                  | MSPD9e              |
| Factor 10     | 0.8850                  | -                   |
| Factor 10     | 0.8745                  | SOQ2b               |
| Factor 10     | 0.8202                  | SOQ2d               |
| Factor 10     | 0.8114                  | SOQ2e               |
| Factor 11     | 0.9227                  | -                   |
| Factor 11     | 0.9638                  | MSPD6b              |
| Factor 11     | 0.8683                  | MSPD6c              |
| Factor 11     | 0.8731                  | MSPD6d              |
| Factor 11     | 0.8851                  | MSPD6e              |
| Factor 12     | 0.9285                  | -                   |

| Factor              | Cronbach's Alpha | Item Removed |
|---------------------|------------------|--------------|
| Factor 12           | 0.9590           | MSPD4b       |
| Factor 12           | 0.8821           | MSPD4c       |
| Factor 12           | 0.8814           | MSPD4d       |
| Factor 12           | 0.9024           | MSPD4e       |
| Factor 13 (2 items) | 0.7879           | -            |
| <b>Composite</b>    | <b>0.9365</b>    | -            |

Table SF84: Cronbach's Alpha for Each Factor and Impact of Item Removal (Excluding Supplementary Items, 13 Factors).

We conducted the factor analysis for a 12-factor solution to identify whether it alters the structure of our analysis, see Section 4.2. Below, we have in Table SF85 the eigenvalues and in Table SF87 the factor loadings for n=12.

| Factors | Eigenvalues | VAR    | CUM    |
|---------|-------------|--------|--------|
| 1       | 6.5911      | 0.0653 | 0.0653 |
| 2       | 4.7757      | 0.0473 | 0.1125 |
| 3       | 4.7003      | 0.0465 | 0.1591 |
| 4       | 4.5184      | 0.0447 | 0.2038 |
| 5       | 4.4444      | 0.0440 | 0.2478 |
| 6       | 3.8902      | 0.0385 | 0.2863 |
| 7       | 3.2158      | 0.0318 | 0.3182 |
| 8       | 3.1359      | 0.0310 | 0.3492 |
| 9       | 2.8321      | 0.0280 | 0.3773 |
| 10      | 2.7468      | 0.0272 | 0.4045 |
| 11      | 2.7165      | 0.0269 | 0.4314 |
| 12      | 2.5976      | 0.0257 | 0.4571 |

Table SF85: Factors, Eigenvalues, Variance Explained, and Cumulative Variance (Excluding Supplementary Items) for 12 Factors (Oblimin Rotation).

| Factor | Items                                                                                    |
|--------|------------------------------------------------------------------------------------------|
| F1     | MSPD10a, MSPD10b, MSPD10c, MSPD10d, MSPD10e, MSPD10f, MSPD10g, MSPD10h, MSPD10i, MSPD10j |
| F2     | MSPD1a, MSPD2a, MSPD3a, MSPD4a, MSPD5a, MSPD6a, MSPD7a, MSPD8a, MSPD9a                   |
| F3     | MIQ4, MIQ5, SOQ1c, SOQ2c                                                                 |
| F4     | MIQ1, TCS1, TCS2, TCS3, TCS4, TCS5                                                       |
| F5     | SOQ1b, SOQ1d, SOQ1e, SOQ3a, SOQ3b, SOQ3d, SOQ3e                                          |
| F6     | MSPD1c, MSPD1d, MSPD1e, MSPD2c, MSPD2d, MSPD2e, MSPD3d, MSPD3e, MSPD5d, MSPD5e, MSPD7e   |
| F7     | MSPD8c, MSPD8d, MSPD8e                                                                   |
| F8     | MSPD1b, MSPD2b, MSPD3b, MSPD4b, MSPD5b, MSPD7b                                           |
| F9     | MSPD9c, MSPD9d, MSPD9e                                                                   |
| F10    | SOQ2b, SOQ2d, SOQ2e                                                                      |
| F11    | MSPD6c, MSPD6d, MSPD6e                                                                   |
| F12    | MSPD4c, MSPD4d, MSPD4e                                                                   |

Table SF86: Factor Structure and Items (Excluding Supplementary Items): 12 Factors (Oblimin Rotation).

| Items         | F1     | F2     | F3     | F4     | F5     | F6     | F7     | F8     | F9     | F10    | F11    | F12    |
|---------------|--------|--------|--------|--------|--------|--------|--------|--------|--------|--------|--------|--------|
| <b>MIQ1</b>   | -0.055 | -0.075 | 0.007  | 0.587  | -0.043 | -0.042 | 0.003  | -0.007 | 0.089  | 0.169  | 0.009  | -0.012 |
| <b>MIQ3</b>   | 0.134  | -0.087 | -0.449 | 0.095  | -0.082 | 0.031  | -0.014 | 0.048  | -0.069 | 0.082  | -0.023 | -0.079 |
| <b>MIQ4</b>   | -0.108 | 0.075  | 0.433  | 0.048  | 0.070  | -0.028 | 0.042  | 0.023  | 0.066  | 0.023  | 0.046  | 0.055  |
| <b>MIQ5</b>   | -0.101 | 0.148  | 0.582  | -0.038 | 0.073  | 0.004  | 0.024  | -0.099 | 0.048  | 0.138  | 0.036  | 0.006  |
| <b>MIQ6</b>   | 0.069  | -0.005 | 0.032  | -0.408 | -0.077 | 0.021  | -0.006 | 0.059  | -0.035 | 0.261  | -0.017 | -0.025 |
| <b>MIQ7</b>   | 0.063  | -0.069 | 0.038  | -0.432 | -0.100 | 0.008  | 0.006  | 0.088  | -0.006 | 0.308  | 0.005  | 0.010  |
| <b>MIQ9</b>   | 0.042  | 0.018  | -0.008 | -0.532 | 0.045  | -0.065 | 0.050  | -0.022 | 0.066  | 0.244  | -0.001 | 0.116  |
| <b>MIQ10</b>  | 0.091  | 0.023  | 0.041  | -0.471 | 0.093  | -0.079 | 0.028  | -0.052 | 0.084  | 0.242  | -0.000 | 0.116  |
| <b>TCS1</b>   | -0.004 | 0.054  | 0.005  | 0.714  | -0.081 | -0.025 | 0.030  | -0.063 | -0.017 | -0.075 | -0.044 | 0.033  |
| <b>TCS2</b>   | 0.000  | 0.000  | 0.027  | 0.827  | -0.052 | -0.000 | -0.008 | -0.013 | -0.049 | -0.035 | -0.020 | -0.028 |
| <b>TCS3</b>   | -0.038 | 0.019  | -0.029 | 0.808  | -0.034 | 0.029  | -0.010 | 0.015  | -0.043 | -0.085 | -0.009 | -0.030 |
| <b>TCS4</b>   | -0.039 | -0.019 | 0.001  | 0.793  | 0.014  | -0.028 | 0.020  | 0.030  | 0.035  | 0.120  | -0.005 | 0.012  |
| <b>TCS5</b>   | 0.026  | -0.068 | 0.015  | 0.711  | 0.042  | -0.043 | -0.009 | -0.002 | 0.155  | 0.066  | 0.006  | 0.068  |
| <b>OSRI1</b>  | 0.069  | 0.180  | 0.119  | -0.007 | -0.070 | 0.027  | 0.039  | -0.052 | 0.023  | 0.166  | -0.012 | -0.052 |
| <b>OSRI2</b>  | 0.138  | -0.002 | -0.143 | 0.133  | -0.057 | -0.029 | -0.041 | 0.013  | 0.027  | 0.243  | 0.049  | 0.055  |
| <b>OSRI3</b>  | 0.039  | -0.003 | -0.040 | -0.156 | 0.105  | 0.043  | 0.048  | 0.101  | 0.092  | 0.064  | -0.054 | 0.097  |
| <b>OSRI4</b>  | 0.104  | 0.020  | -0.062 | 0.005  | -0.010 | 0.039  | 0.039  | 0.050  | -0.008 | 0.076  | 0.011  | -0.029 |
| <b>OSRI5</b>  | -0.084 | 0.119  | 0.155  | 0.050  | 0.033  | -0.088 | 0.006  | -0.148 | -0.026 | -0.080 | 0.044  | -0.082 |
| <b>OSRI6</b>  | 0.038  | 0.162  | 0.208  | 0.011  | -0.038 | -0.042 | 0.087  | 0.014  | 0.007  | 0.185  | 0.012  | -0.040 |
| <b>OSRI7</b>  | 0.174  | -0.071 | -0.211 | 0.133  | -0.110 | 0.001  | -0.006 | 0.015  | -0.056 | 0.146  | -0.021 | 0.057  |
| <b>OSRI8</b>  | 0.073  | 0.100  | 0.215  | 0.016  | -0.061 | -0.063 | 0.088  | -0.035 | -0.027 | 0.030  | -0.046 | -0.108 |
| <b>OSRI9</b>  | 0.143  | 0.029  | -0.082 | -0.099 | -0.015 | 0.063  | 0.039  | 0.058  | 0.024  | 0.152  | -0.056 | -0.008 |
| <b>OSRI10</b> | -0.001 | 0.187  | 0.046  | -0.089 | 0.048  | 0.021  | 0.011  | 0.019  | 0.005  | 0.071  | -0.047 | -0.045 |
| <b>OSRI11</b> | 0.126  | 0.088  | -0.118 | -0.003 | 0.035  | 0.029  | 0.054  | 0.037  | -0.035 | 0.231  | -0.052 | 0.023  |
| <b>OSRI12</b> | 0.105  | -0.052 | -0.203 | 0.065  | -0.091 | 0.050  | 0.074  | 0.060  | -0.130 | 0.181  | 0.079  | 0.002  |
| <b>OSRI13</b> | 0.023  | 0.173  | 0.287  | 0.060  | -0.052 | 0.033  | -0.004 | -0.086 | -0.018 | 0.186  | 0.099  | -0.048 |
| <b>OSRI14</b> | 0.126  | 0.043  | -0.141 | 0.191  | -0.108 | 0.013  | 0.024  | 0.015  | -0.074 | 0.154  | 0.057  | -0.042 |
| <b>OSRI15</b> | 0.069  | 0.235  | 0.234  | 0.012  | -0.047 | 0.045  | -0.015 | -0.053 | -0.012 | 0.158  | 0.024  | -0.055 |

| Items         | F1     | F2     | F3     | F4     | F5     | F6     | F7     | F8     | F9     | F10    | F11    | F12    |
|---------------|--------|--------|--------|--------|--------|--------|--------|--------|--------|--------|--------|--------|
| <b>OSRI16</b> | 0.159  | 0.002  | -0.239 | 0.189  | -0.115 | 0.037  | 0.042  | 0.008  | -0.123 | 0.189  | 0.003  | 0.025  |
| <b>OSRI17</b> | 0.015  | 0.163  | 0.179  | 0.041  | -0.010 | -0.001 | 0.004  | -0.007 | -0.001 | 0.051  | -0.013 | -0.034 |
| <b>OSRI18</b> | 0.126  | -0.024 | -0.134 | 0.041  | -0.058 | 0.021  | 0.021  | 0.064  | -0.068 | 0.289  | 0.039  | 0.068  |
| <b>SOQ1a</b>  | -0.029 | 0.027  | -0.816 | 0.057  | 0.268  | 0.016  | 0.032  | -0.036 | -0.011 | 0.021  | 0.044  | -0.008 |
| <b>SOQ1b</b>  | -0.013 | 0.057  | -0.115 | -0.016 | 0.667  | 0.023  | -0.001 | -0.049 | -0.028 | 0.181  | 0.079  | -0.043 |
| <b>SOQ1c</b>  | -0.034 | 0.049  | 0.674  | 0.109  | 0.388  | 0.035  | 0.006  | -0.037 | -0.054 | 0.026  | 0.045  | -0.037 |
| <b>SOQ1d</b>  | 0.020  | 0.022  | -0.011 | -0.034 | 0.681  | 0.008  | -0.045 | -0.079 | -0.022 | 0.180  | 0.089  | -0.029 |
| <b>SOQ1e</b>  | 0.013  | -0.032 | 0.000  | -0.061 | 0.539  | 0.025  | -0.038 | -0.028 | 0.023  | 0.305  | 0.048  | 0.021  |
| <b>SOQ2a</b>  | 0.028  | -0.003 | -0.815 | 0.063  | -0.007 | -0.004 | 0.025  | -0.012 | 0.009  | 0.215  | 0.009  | 0.007  |
| <b>SOQ2b</b>  | 0.037  | 0.020  | -0.112 | -0.046 | 0.107  | 0.004  | 0.046  | 0.032  | 0.001  | 0.706  | 0.045  | 0.003  |
| <b>SOQ2c</b>  | 0.013  | 0.074  | 0.739  | 0.048  | 0.085  | 0.039  | 0.028  | 0.010  | 0.011  | 0.263  | -0.030 | -0.010 |
| <b>SOQ2d</b>  | 0.030  | -0.016 | 0.099  | -0.103 | 0.116  | 0.013  | -0.015 | 0.042  | 0.011  | 0.701  | 0.045  | 0.054  |
| <b>SOQ2e</b>  | 0.045  | -0.074 | 0.064  | -0.125 | 0.058  | 0.033  | -0.005 | 0.092  | 0.060  | 0.717  | -0.002 | 0.048  |
| <b>SOQ3a</b>  | -0.019 | 0.004  | -0.779 | 0.009  | 0.447  | 0.035  | 0.029  | 0.012  | 0.013  | -0.092 | -0.012 | 0.020  |
| <b>SOQ3b</b>  | 0.019  | 0.008  | -0.090 | -0.042 | 0.910  | -0.002 | 0.038  | 0.042  | 0.002  | -0.024 | -0.012 | 0.017  |
| <b>SOQ3c</b>  | -0.002 | 0.024  | 0.644  | 0.095  | 0.603  | 0.007  | 0.030  | 0.007  | -0.020 | -0.103 | -0.029 | -0.005 |
| <b>SOQ3d</b>  | 0.030  | -0.003 | -0.013 | -0.066 | 0.906  | -0.006 | 0.013  | 0.019  | -0.000 | -0.012 | -0.004 | 0.009  |
| <b>SOQ3e</b>  | 0.043  | -0.052 | 0.009  | -0.085 | 0.786  | -0.001 | -0.015 | 0.047  | 0.066  | 0.116  | -0.049 | 0.041  |
| <b>MSPD1a</b> | 0.031  | 0.712  | 0.041  | -0.037 | -0.011 | 0.055  | -0.016 | -0.022 | -0.011 | 0.006  | -0.071 | 0.014  |
| <b>MSPD1b</b> | 0.018  | 0.022  | -0.026 | -0.094 | 0.012  | 0.192  | 0.016  | 0.559  | -0.007 | 0.122  | -0.025 | -0.030 |
| <b>MSPD1c</b> | 0.011  | -0.049 | 0.003  | -0.044 | 0.007  | 0.504  | 0.107  | 0.168  | 0.206  | 0.034  | -0.063 | 0.106  |
| <b>MSPD1d</b> | 0.002  | 0.002  | -0.006 | -0.028 | -0.009 | 0.628  | 0.123  | 0.111  | 0.129  | -0.042 | 0.002  | -0.022 |
| <b>MSPD1e</b> | 0.044  | 0.042  | -0.004 | -0.022 | -0.008 | 0.670  | 0.087  | 0.085  | 0.078  | 0.060  | 0.033  | -0.029 |
| <b>MSPD2a</b> | -0.010 | 0.777  | -0.013 | -0.033 | 0.011  | 0.083  | 0.018  | -0.059 | 0.008  | -0.007 | -0.016 | -0.099 |
| <b>MSPD2b</b> | 0.035  | -0.064 | -0.003 | -0.057 | 0.013  | 0.186  | 0.029  | 0.665  | 0.023  | 0.059  | 0.026  | 0.062  |
| <b>MSPD2c</b> | 0.019  | -0.098 | -0.011 | -0.060 | 0.026  | 0.470  | -0.001 | 0.125  | 0.110  | 0.028  | 0.088  | 0.274  |
| <b>MSPD2d</b> | 0.032  | -0.057 | -0.018 | -0.061 | 0.019  | 0.574  | 0.005  | 0.091  | 0.076  | -0.035 | 0.103  | 0.210  |
| <b>MSPD2e</b> | 0.057  | -0.033 | -0.015 | -0.027 | 0.014  | 0.625  | 0.002  | 0.052  | 0.056  | 0.046  | 0.142  | 0.133  |
| <b>MSPD3a</b> | -0.006 | 0.788  | 0.006  | 0.027  | -0.031 | 0.063  | -0.006 | -0.005 | -0.072 | 0.015  | -0.039 | -0.045 |

| Items  | F1     | F2     | F3     | F4     | F5     | F6     | F7     | F8     | F9     | F10    | F11    | F12    |
|--------|--------|--------|--------|--------|--------|--------|--------|--------|--------|--------|--------|--------|
| MSPD3b | 0.048  | -0.035 | 0.026  | 0.044  | 0.016  | 0.189  | -0.015 | 0.630  | 0.074  | 0.017  | 0.050  | 0.119  |
| MSPD3c | -0.003 | -0.084 | 0.026  | -0.007 | -0.004 | 0.366  | 0.078  | 0.096  | 0.076  | 0.051  | 0.151  | 0.337  |
| MSPD3d | 0.039  | -0.038 | 0.025  | -0.005 | -0.020 | 0.458  | 0.088  | 0.000  | 0.026  | 0.013  | 0.208  | 0.253  |
| MSPD3e | 0.060  | -0.013 | -0.005 | 0.020  | -0.020 | 0.508  | 0.063  | -0.025 | 0.044  | 0.075  | 0.214  | 0.190  |
| MSPD4a | -0.020 | 0.769  | -0.002 | 0.031  | -0.001 | -0.015 | 0.010  | -0.002 | -0.068 | 0.012  | -0.073 | 0.143  |
| MSPD4b | 0.083  | 0.057  | -0.033 | -0.024 | 0.003  | -0.074 | 0.026  | 0.518  | 0.027  | 0.092  | 0.023  | 0.413  |
| MSPD4c | 0.041  | -0.003 | -0.008 | -0.021 | 0.013  | 0.024  | 0.062  | 0.050  | 0.056  | 0.010  | 0.072  | 0.807  |
| MSPD4d | 0.044  | 0.017  | -0.005 | -0.036 | -0.003 | 0.061  | 0.059  | 0.006  | 0.057  | -0.004 | 0.083  | 0.798  |
| MSPD4e | 0.070  | 0.016  | -0.012 | -0.007 | -0.013 | 0.225  | 0.045  | -0.021 | -0.019 | 0.079  | 0.127  | 0.611  |
| MSPD5a | -0.041 | 0.761  | 0.026  | -0.032 | -0.010 | -0.011 | -0.027 | 0.067  | 0.081  | -0.047 | -0.042 | 0.133  |
| MSPD5b | 0.120  | 0.140  | 0.009  | -0.012 | 0.043  | 0.151  | 0.020  | 0.579  | -0.053 | 0.029  | 0.041  | 0.023  |
| MSPD5c | 0.033  | 0.020  | 0.040  | -0.023 | 0.032  | 0.377  | 0.077  | 0.045  | 0.207  | -0.037 | 0.111  | 0.269  |
| MSPD5d | 0.067  | 0.033  | 0.045  | -0.015 | 0.029  | 0.430  | 0.092  | 0.003  | 0.155  | -0.080 | 0.175  | 0.201  |
| MSPD5e | 0.072  | 0.068  | 0.023  | 0.031  | 0.023  | 0.479  | 0.068  | -0.028 | 0.103  | 0.016  | 0.199  | 0.189  |
| MSPD6a | 0.010  | 0.732  | 0.001  | -0.015 | 0.011  | -0.117 | 0.021  | -0.003 | -0.122 | -0.027 | 0.171  | -0.077 |
| MSPD6b | 0.053  | 0.053  | 0.000  | -0.031 | -0.000 | -0.138 | 0.004  | 0.600  | -0.002 | -0.014 | 0.453  | 0.005  |
| MSPD6c | 0.010  | -0.060 | -0.005 | -0.030 | -0.003 | -0.025 | 0.031  | 0.071  | 0.088  | 0.013  | 0.781  | 0.134  |
| MSPD6d | 0.030  | -0.028 | 0.007  | -0.022 | -0.007 | 0.034  | 0.037  | 0.005  | 0.063  | -0.020 | 0.839  | 0.071  |
| MSPD6e | 0.059  | 0.001  | -0.009 | -0.007 | 0.009  | 0.142  | 0.034  | -0.008 | 0.023  | 0.045  | 0.795  | -0.014 |
| MSPD7a | 0.104  | 0.555  | 0.013  | -0.017 | 0.030  | -0.073 | -0.034 | 0.055  | 0.119  | 0.034  | -0.002 | 0.078  |
| MSPD7b | 0.022  | 0.077  | 0.010  | -0.053 | -0.011 | 0.061  | 0.146  | 0.531  | -0.063 | 0.029  | 0.059  | -0.033 |
| MSPD7c | 0.006  | -0.035 | 0.003  | -0.068 | 0.006  | 0.232  | 0.165  | 0.101  | 0.294  | 0.041  | 0.173  | 0.091  |
| MSPD7d | -0.005 | 0.020  | -0.013 | -0.027 | -0.014 | 0.308  | 0.184  | 0.060  | 0.220  | -0.013 | 0.262  | 0.035  |
| MSPD7e | 0.021  | 0.028  | -0.019 | -0.027 | -0.000 | 0.394  | 0.191  | 0.040  | 0.154  | 0.038  | 0.235  | -0.024 |
| MSPD8a | 0.119  | 0.541  | 0.008  | -0.028 | -0.013 | -0.050 | 0.074  | 0.123  | 0.055  | -0.025 | 0.025  | -0.054 |
| MSPD8b | 0.105  | 0.126  | -0.005 | 0.002  | -0.030 | -0.093 | 0.447  | 0.451  | -0.052 | 0.027  | 0.005  | -0.001 |
| MSPD8c | 0.003  | -0.038 | 0.009  | -0.013 | 0.008  | -0.041 | 0.957  | 0.007  | 0.039  | -0.010 | -0.027 | 0.013  |
| MSPD8d | -0.003 | -0.000 | -0.001 | 0.014  | -0.003 | -0.011 | 0.977  | -0.024 | 0.018  | -0.026 | 0.015  | 0.000  |
| MSPD8e | -0.000 | 0.010  | -0.020 | 0.011  | -0.012 | 0.058  | 0.914  | -0.025 | 0.001  | 0.026  | 0.011  | 0.001  |

| Items   | F1     | F2     | F3     | F4     | F5     | F6     | F7     | F8     | F9     | F10    | F11    | F12    |
|---------|--------|--------|--------|--------|--------|--------|--------|--------|--------|--------|--------|--------|
| MSPD9a  | 0.110  | 0.552  | -0.061 | 0.062  | 0.002  | -0.082 | -0.111 | 0.084  | 0.291  | -0.027 | -0.005 | -0.083 |
| MSPD9b  | 0.116  | 0.054  | 0.005  | 0.014  | 0.040  | -0.076 | -0.001 | 0.506  | 0.389  | 0.026  | 0.004  | 0.008  |
| MSPD9c  | -0.003 | -0.035 | 0.008  | -0.011 | 0.002  | -0.006 | 0.078  | 0.023  | 0.878  | 0.008  | 0.026  | 0.055  |
| MSPD9d  | 0.025  | 0.004  | -0.001 | 0.010  | -0.005 | 0.046  | 0.076  | -0.028 | 0.853  | -0.025 | 0.067  | 0.012  |
| MSPD9e  | 0.058  | 0.006  | -0.015 | 0.037  | -0.007 | 0.162  | 0.064  | -0.043 | 0.720  | 0.058  | 0.076  | -0.006 |
| MSPD10a | 0.835  | 0.023  | 0.010  | -0.026 | -0.005 | 0.011  | -0.006 | 0.015  | 0.057  | -0.030 | 0.013  | -0.008 |
| MSPD10b | 0.872  | 0.010  | -0.042 | 0.039  | -0.017 | -0.005 | -0.015 | 0.016  | 0.080  | -0.046 | -0.014 | -0.010 |
| MSPD10c | 0.781  | -0.008 | -0.054 | 0.040  | 0.021  | 0.014  | -0.007 | -0.013 | -0.007 | -0.019 | 0.018  | -0.055 |
| MSPD10d | 0.781  | -0.030 | -0.058 | 0.069  | -0.004 | -0.037 | -0.030 | 0.032  | -0.050 | 0.036  | -0.005 | 0.076  |
| MSPD10e | 0.667  | 0.001  | -0.003 | 0.021  | 0.015  | -0.038 | 0.001  | 0.003  | -0.021 | 0.050  | 0.029  | 0.024  |
| MSPD10f | 0.861  | 0.051  | 0.042  | -0.050 | -0.002 | 0.043  | 0.019  | -0.070 | -0.040 | -0.005 | -0.012 | -0.011 |
| MSPD10g | 0.729  | -0.017 | -0.021 | 0.036  | 0.031  | -0.000 | -0.067 | 0.020  | -0.098 | -0.016 | 0.046  | -0.015 |
| MSPD10h | 0.772  | -0.011 | 0.025  | -0.090 | 0.025  | -0.028 | 0.051  | 0.009  | 0.027  | 0.002  | -0.010 | 0.044  |
| MSPD10i | 0.801  | -0.025 | 0.014  | -0.035 | 0.012  | -0.001 | 0.018  | 0.018  | 0.047  | 0.027  | 0.000  | 0.024  |
| MSPD10j | 0.746  | 0.021  | 0.112  | -0.080 | 0.014  | 0.022  | 0.066  | -0.015 | -0.032 | 0.022  | -0.004 | -0.023 |

Table SF87: EFA for Total Sample (Excluding Supplementary Items): 12 Factors Using Oblimin Rotation.

### 5.3. Exploratory Factor Analysis - Excluding Supplementary Items - Cisgender

| Factors | Eigenvalues | VAR    | CUM    |
|---------|-------------|--------|--------|
| 1       | 6.6375      | 0.0657 | 0.0657 |
| 2       | 6.5466      | 0.0648 | 0.1305 |
| 3       | 5.0378      | 0.0499 | 0.1804 |
| 4       | 4.7586      | 0.0471 | 0.2275 |
| 5       | 3.3529      | 0.0332 | 0.2607 |
| 6       | 3.2690      | 0.0324 | 0.2931 |
| 7       | 3.1151      | 0.0308 | 0.3239 |
| 8       | 3.0366      | 0.0301 | 0.3540 |
| 9       | 3.0325      | 0.0300 | 0.3840 |
| 10      | 3.0087      | 0.0298 | 0.4138 |
| 11      | 2.9983      | 0.0297 | 0.4435 |
| 12      | 2.7112      | 0.0268 | 0.4703 |
| 13      | 1.5977      | 0.0158 | 0.4862 |

Table SF88: Factors, Eigenvalues, Variance Explained, and Cumulative Variance for Prolific Cisgender Sample: Excluding Supplementary Items, 13 Factors (Oblimin Rotation).

| Factor | Items                                                                                    |
|--------|------------------------------------------------------------------------------------------|
| F1     | MIQ4, MIQ5, SOQ1c, SOQ2c, SOQ3c                                                          |
| F2     | MSPD10a, MSPD10b, MSPD10c, MSPD10d, MSPD10e, MSPD10f, MSPD10g, MSPD10h, MSPD10i, MSPD10j |
| F3     | MIQ1, TCS1, TCS2, TCS3, TCS4, TCS5                                                       |
| F4     | MSPD1a, MSPD2a, MSPD3a, MSPD4a, MSPD5a, MSPD6a, MSPD7a, MSPD8a, MSPD9a                   |
| F5     | MSPD1b, MSPD2b, MSPD3b, MSPD4b, MSPD5b, MSPD6b, MSPD7b, MSPD8b                           |
| F6     | MSPD1c, MSPD1d, MSPD1e                                                                   |
| F7     | MSPD6c, MSPD6d, MSPD6e                                                                   |
| F8     | SOQ3b, SOQ3d, SOQ3e                                                                      |
| F9     | SOQ1b, SOQ1d, SOQ1e                                                                      |
| F10    | MSPD4c, MSPD4d, MSPD4e                                                                   |
| F11    | MSPD8c, MSPD8d, MSPD8e                                                                   |
| F12    | MSPD9c, MSPD9d, MSPD9e                                                                   |
| F13    | MSPD2e, MSPD3e                                                                           |

Table SF89: Prolific Cisgender Sample: Factor Structure and Items (18 Factors and Oblimin Rotation).

| Items         | F1     | F2     | F3     | F4     | F5     | F6     | F7     | F8     | F9     | F10    | F11    | F12    | F13    |
|---------------|--------|--------|--------|--------|--------|--------|--------|--------|--------|--------|--------|--------|--------|
| <b>MIQ1</b>   | -0.022 | -0.073 | 0.588  | -0.008 | 0.032  | 0.018  | -0.011 | -0.076 | -0.014 | -0.083 | 0.003  | 0.038  | -0.005 |
| <b>MIQ3</b>   | -0.617 | 0.106  | 0.076  | -0.088 | 0.054  | -0.032 | -0.011 | -0.076 | 0.004  | -0.093 | 0.033  | -0.081 | 0.082  |
| <b>MIQ4</b>   | 0.596  | -0.057 | 0.063  | 0.045  | 0.032  | 0.037  | 0.039  | -0.004 | 0.066  | 0.036  | 0.007  | 0.030  | -0.054 |
| <b>MIQ5</b>   | 0.744  | -0.123 | -0.057 | 0.130  | -0.071 | 0.003  | 0.012  | -0.042 | 0.072  | -0.015 | 0.024  | 0.018  | 0.010  |
| <b>MIQ6</b>   | 0.017  | 0.042  | -0.558 | -0.012 | 0.085  | -0.031 | 0.017  | 0.005  | 0.022  | -0.088 | -0.027 | -0.016 | 0.058  |
| <b>MIQ7</b>   | 0.004  | 0.056  | -0.611 | -0.048 | 0.081  | -0.007 | -0.015 | -0.036 | 0.039  | -0.063 | -0.016 | 0.009  | 0.023  |
| <b>MIQ9</b>   | -0.103 | -0.020 | -0.582 | 0.025  | 0.086  | -0.053 | -0.007 | -0.018 | 0.044  | 0.003  | 0.092  | 0.018  | 0.031  |
| <b>MIQ10</b>  | -0.036 | -0.014 | -0.632 | 0.073  | 0.039  | 0.000  | 0.048  | -0.003 | 0.049  | -0.081 | 0.105  | -0.044 | -0.028 |
| <b>TCS1</b>   | 0.029  | -0.023 | 0.631  | 0.015  | -0.060 | -0.035 | -0.030 | -0.096 | 0.025  | 0.041  | 0.091  | -0.020 | 0.005  |
| <b>TCS2</b>   | 0.095  | 0.017  | 0.762  | -0.062 | 0.028  | -0.019 | 0.014  | -0.050 | 0.030  | -0.069 | 0.004  | -0.060 | 0.041  |
| <b>TCS3</b>   | -0.034 | -0.020 | 0.758  | 0.003  | 0.061  | -0.018 | 0.051  | -0.008 | -0.045 | -0.062 | 0.015  | -0.027 | 0.041  |
| <b>TCS4</b>   | -0.049 | -0.009 | 0.825  | 0.027  | 0.032  | -0.008 | -0.028 | 0.020  | 0.001  | -0.021 | 0.012  | -0.007 | 0.025  |
| <b>TCS5</b>   | -0.020 | -0.013 | 0.743  | -0.002 | 0.022  | 0.063  | -0.024 | 0.005  | -0.008 | 0.019  | -0.013 | 0.119  | -0.082 |
| <b>OSRI1</b>  | 0.230  | 0.067  | -0.107 | 0.085  | 0.043  | 0.059  | -0.017 | -0.135 | 0.103  | -0.056 | -0.087 | 0.093  | 0.001  |
| <b>OSRI2</b>  | -0.130 | 0.125  | 0.044  | -0.060 | 0.011  | -0.134 | 0.001  | -0.007 | 0.053  | 0.046  | -0.022 | 0.062  | 0.100  |
| <b>OSRI3</b>  | -0.039 | 0.060  | -0.141 | 0.032  | 0.002  | 0.058  | -0.060 | 0.107  | 0.009  | 0.152  | 0.032  | 0.118  | -0.076 |
| <b>OSRI4</b>  | -0.054 | 0.150  | -0.033 | 0.013  | 0.003  | -0.017 | 0.050  | -0.009 | 0.023  | -0.043 | 0.026  | 0.016  | 0.071  |
| <b>OSRI5</b>  | 0.201  | -0.095 | 0.053  | 0.104  | -0.098 | -0.080 | 0.105  | -0.045 | 0.046  | -0.078 | -0.005 | -0.067 | 0.014  |
| <b>OSRI6</b>  | 0.301  | 0.073  | -0.118 | 0.057  | 0.068  | -0.082 | 0.012  | -0.091 | 0.097  | -0.038 | 0.055  | 0.049  | -0.009 |
| <b>OSRI7</b>  | -0.223 | 0.174  | 0.024  | -0.140 | 0.051  | -0.046 | -0.064 | -0.107 | 0.069  | 0.102  | 0.042  | -0.050 | 0.049  |
| <b>OSRI8</b>  | 0.327  | 0.090  | -0.059 | -0.066 | 0.027  | -0.022 | -0.049 | -0.045 | -0.063 | -0.128 | 0.081  | -0.009 | -0.046 |
| <b>OSRI9</b>  | -0.108 | 0.143  | -0.105 | 0.024  | 0.083  | 0.069  | -0.168 | 0.022  | 0.017  | 0.062  | 0.016  | 0.031  | 0.004  |
| <b>OSRI10</b> | 0.132  | 0.019  | -0.195 | 0.087  | 0.037  | 0.013  | -0.052 | -0.003 | 0.097  | -0.047 | -0.003 | 0.042  | 0.003  |
| <b>OSRI11</b> | -0.092 | 0.144  | -0.114 | 0.057  | 0.039  | -0.049 | -0.105 | -0.003 | 0.067  | 0.032  | 0.025  | 0.030  | 0.082  |
| <b>OSRI12</b> | -0.209 | 0.165  | -0.021 | -0.092 | 0.027  | -0.047 | 0.071  | -0.046 | -0.027 | 0.002  | 0.092  | -0.111 | 0.124  |
| <b>OSRI13</b> | 0.363  | -0.001 | -0.087 | 0.081  | -0.011 | -0.015 | 0.087  | -0.089 | 0.064  | -0.073 | 0.015  | -0.016 | 0.078  |
| <b>OSRI14</b> | -0.117 | 0.106  | 0.097  | 0.016  | 0.061  | -0.078 | 0.060  | -0.022 | -0.064 | -0.123 | 0.099  | -0.082 | 0.121  |
| <b>OSRI15</b> | 0.319  | 0.049  | -0.135 | 0.178  | -0.032 | -0.018 | 0.086  | -0.047 | 0.028  | -0.091 | -0.036 | 0.044  | 0.046  |
| <b>OSRI16</b> | -0.252 | 0.162  | 0.079  | -0.094 | 0.058  | -0.113 | 0.022  | 0.024  | -0.049 | 0.006  | 0.075  | -0.094 | 0.145  |
| <b>OSRI17</b> | 0.278  | 0.017  | -0.106 | 0.075  | 0.011  | 0.018  | -0.014 | -0.029 | 0.007  | -0.055 | 0.035  | -0.025 | 0.039  |

|               |        |        |        |        |        |        |        |        |        |        |        |        |        |
|---------------|--------|--------|--------|--------|--------|--------|--------|--------|--------|--------|--------|--------|--------|
| <b>OSRI18</b> | -0.140 | 0.099  | -0.000 | -0.015 | 0.071  | -0.105 | -0.032 | -0.067 | 0.075  | 0.056  | 0.039  | -0.017 | 0.118  |
| <b>SOQ1a</b>  | -0.873 | -0.000 | 0.050  | -0.000 | -0.026 | 0.015  | 0.034  | 0.013  | 0.328  | 0.005  | 0.044  | -0.016 | -0.043 |
| <b>SOQ1b</b>  | -0.030 | -0.013 | 0.003  | 0.027  | -0.012 | -0.000 | -0.022 | 0.046  | 0.943  | 0.014  | -0.010 | 0.006  | 0.005  |
| <b>SOQ1c</b>  | 0.798  | -0.001 | 0.138  | 0.025  | -0.024 | 0.043  | 0.038  | -0.031 | 0.359  | -0.020 | 0.044  | -0.086 | -0.011 |
| <b>SOQ1d</b>  | 0.012  | 0.000  | -0.035 | 0.000  | -0.019 | 0.002  | 0.012  | 0.070  | 0.907  | -0.007 | -0.011 | -0.006 | -0.021 |
| <b>SOQ1e</b>  | 0.001  | 0.001  | -0.042 | -0.011 | 0.022  | -0.036 | -0.000 | 0.092  | 0.870  | -0.005 | 0.001  | 0.017  | 0.035  |
| <b>SOQ2a</b>  | -0.892 | 0.053  | 0.036  | -0.039 | 0.024  | -0.008 | 0.029  | -0.003 | 0.008  | -0.007 | -0.021 | 0.009  | 0.000  |
| <b>SOQ2b</b>  | 0.007  | 0.095  | -0.187 | -0.093 | 0.144  | 0.015  | 0.059  | 0.102  | 0.266  | -0.071 | -0.088 | 0.039  | -0.010 |
| <b>SOQ2c</b>  | 0.883  | 0.029  | 0.011  | 0.019  | 0.060  | 0.009  | -0.038 | 0.062  | 0.038  | -0.006 | 0.014  | 0.039  | -0.025 |
| <b>SOQ2d</b>  | 0.148  | 0.003  | -0.237 | -0.094 | 0.212  | 0.006  | 0.050  | 0.052  | 0.248  | 0.011  | -0.046 | 0.023  | -0.020 |
| <b>SOQ2e</b>  | 0.116  | 0.084  | -0.286 | -0.149 | 0.203  | 0.021  | -0.000 | 0.073  | 0.224  | -0.005 | -0.047 | 0.074  | 0.002  |
| <b>SOQ3a</b>  | -0.864 | -0.007 | 0.036  | -0.002 | -0.016 | 0.063  | 0.007  | 0.330  | 0.053  | 0.010  | 0.040  | -0.000 | -0.040 |
| <b>SOQ3b</b>  | -0.030 | -0.011 | -0.016 | 0.027  | 0.007  | -0.006 | -0.007 | 0.951  | 0.053  | 0.002  | 0.013  | -0.011 | 0.006  |
| <b>SOQ3c</b>  | 0.798  | 0.029  | 0.150  | -0.009 | -0.031 | -0.006 | 0.010  | 0.409  | 0.002  | -0.008 | 0.021  | -0.036 | -0.000 |
| <b>SOQ3d</b>  | 0.011  | 0.004  | -0.038 | -0.002 | -0.011 | 0.008  | 0.006  | 0.932  | 0.053  | -0.007 | -0.005 | -0.005 | -0.015 |
| <b>SOQ3e</b>  | -0.008 | -0.007 | -0.013 | -0.009 | 0.019  | -0.024 | -0.010 | 0.904  | 0.085  | -0.009 | -0.005 | 0.027  | 0.022  |
| <b>MSPD1a</b> | 0.049  | 0.027  | -0.100 | 0.755  | -0.085 | 0.151  | -0.024 | -0.011 | 0.014  | -0.013 | -0.019 | -0.033 | -0.039 |
| <b>MSPD1b</b> | -0.022 | 0.011  | -0.131 | 0.043  | 0.542  | 0.272  | -0.026 | 0.019  | 0.000  | 0.021  | -0.049 | -0.032 | -0.065 |
| <b>MSPD1c</b> | -0.010 | 0.004  | 0.013  | -0.019 | 0.064  | 0.905  | -0.011 | -0.006 | -0.007 | 0.037  | 0.044  | 0.047  | -0.073 |
| <b>MSPD1d</b> | 0.004  | 0.014  | 0.017  | 0.009  | -0.003 | 0.899  | 0.026  | 0.005  | -0.018 | -0.005 | 0.053  | 0.027  | -0.009 |
| <b>MSPD1e</b> | 0.004  | 0.051  | -0.010 | 0.081  | -0.007 | 0.757  | 0.030  | -0.041 | -0.003 | -0.024 | 0.035  | 0.005  | 0.183  |
| <b>MSPD2a</b> | -0.008 | 0.014  | -0.011 | 0.801  | -0.057 | 0.051  | -0.036 | -0.000 | 0.038  | -0.101 | 0.071  | -0.025 | 0.047  |
| <b>MSPD2b</b> | -0.021 | 0.018  | -0.066 | -0.057 | 0.689  | 0.143  | 0.074  | 0.006  | -0.016 | 0.001  | 0.044  | 0.004  | 0.049  |
| <b>MSPD2c</b> | -0.016 | 0.035  | -0.016 | -0.116 | 0.111  | 0.339  | 0.176  | 0.051  | 0.008  | 0.224  | -0.047 | 0.089  | 0.293  |
| <b>MSPD2d</b> | -0.019 | 0.036  | 0.004  | -0.086 | 0.098  | 0.363  | 0.137  | 0.036  | 0.027  | 0.234  | -0.050 | 0.092  | 0.326  |
| <b>MSPD2e</b> | -0.016 | 0.057  | 0.002  | -0.028 | 0.049  | 0.283  | 0.168  | 0.027  | 0.037  | 0.151  | -0.016 | 0.076  | 0.469  |
| <b>MSPD3a</b> | 0.002  | -0.014 | 0.015  | 0.804  | 0.011  | 0.009  | -0.024 | -0.030 | 0.000  | 0.017  | -0.052 | -0.050 | 0.033  |
| <b>MSPD3b</b> | 0.021  | 0.040  | 0.039  | -0.025 | 0.661  | 0.108  | 0.063  | 0.020  | -0.010 | 0.076  | 0.000  | 0.084  | 0.138  |
| <b>MSPD3c</b> | 0.018  | -0.028 | 0.007  | -0.090 | 0.157  | 0.171  | 0.157  | 0.014  | 0.023  | 0.293  | 0.115  | 0.063  | 0.332  |
| <b>MSPD3d</b> | 0.022  | -0.005 | 0.010  | -0.048 | 0.071  | 0.149  | 0.189  | 0.013  | 0.005  | 0.289  | 0.149  | 0.043  | 0.367  |
| <b>MSPD3e</b> | -0.001 | -0.008 | 0.011  | -0.020 | 0.050  | 0.073  | 0.167  | 0.004  | 0.008  | 0.242  | 0.140  | 0.067  | 0.512  |

|                |        |        |        |        |        |        |        |        |        |        |        |        |        |
|----------------|--------|--------|--------|--------|--------|--------|--------|--------|--------|--------|--------|--------|--------|
| <b>MSPD4a</b>  | 0.017  | -0.005 | 0.004  | 0.740  | 0.009  | -0.043 | -0.046 | 0.049  | -0.004 | 0.164  | -0.004 | -0.053 | -0.024 |
| <b>MSPD4b</b>  | -0.047 | 0.132  | -0.015 | 0.090  | 0.500  | 0.015  | -0.016 | -0.025 | 0.047  | 0.462  | 0.009  | 0.003  | -0.164 |
| <b>MSPD4c</b>  | 0.003  | 0.039  | -0.015 | -0.009 | 0.045  | 0.028  | 0.093  | 0.012  | -0.004 | 0.808  | 0.064  | 0.041  | -0.007 |
| <b>MSPD4d</b>  | -0.003 | 0.032  | -0.017 | 0.011  | 0.003  | 0.032  | 0.090  | -0.010 | -0.012 | 0.844  | 0.052  | 0.058  | -0.010 |
| <b>MSPD4e</b>  | -0.002 | 0.038  | -0.025 | 0.030  | -0.011 | 0.016  | 0.058  | -0.016 | 0.016  | 0.740  | 0.056  | 0.011  | 0.187  |
| <b>MSPD5a</b>  | 0.057  | -0.029 | -0.012 | 0.754  | 0.115  | 0.019  | -0.051 | 0.012  | -0.010 | 0.111  | -0.004 | 0.084  | -0.004 |
| <b>MSPD5b</b>  | -0.010 | 0.098  | -0.008 | 0.130  | 0.610  | 0.019  | -0.021 | 0.044  | -0.018 | 0.098  | 0.044  | -0.055 | 0.098  |
| <b>MSPD5c</b>  | 0.061  | -0.016 | -0.054 | -0.001 | 0.055  | 0.291  | 0.093  | 0.033  | -0.009 | 0.287  | 0.077  | 0.222  | 0.167  |
| <b>MSPD5d</b>  | 0.066  | 0.014  | -0.028 | 0.024  | 0.011  | 0.276  | 0.157  | 0.039  | -0.024 | 0.252  | 0.088  | 0.196  | 0.201  |
| <b>MSPD5e</b>  | 0.047  | -0.002 | -0.026 | 0.061  | 0.011  | 0.132  | 0.129  | -0.015 | 0.020  | 0.290  | 0.112  | 0.157  | 0.375  |
| <b>MSPD6a</b>  | 0.037  | 0.063  | -0.009 | 0.710  | -0.016 | -0.118 | 0.185  | 0.018  | -0.033 | -0.029 | 0.009  | -0.109 | -0.075 |
| <b>MSPD6b</b>  | -0.023 | 0.074  | 0.005  | 0.092  | 0.541  | -0.034 | 0.472  | 0.007  | 0.009  | 0.010  | -0.011 | -0.007 | -0.109 |
| <b>MSPD6c</b>  | -0.016 | 0.012  | -0.011 | -0.042 | 0.044  | 0.050  | 0.850  | -0.010 | 0.002  | 0.094  | 0.005  | 0.058  | -0.055 |
| <b>MSPD6d</b>  | 0.006  | 0.043  | -0.006 | -0.020 | -0.023 | 0.026  | 0.883  | -0.012 | 0.005  | 0.079  | 0.027  | 0.042  | -0.021 |
| <b>MSPD6e</b>  | -0.017 | 0.008  | -0.027 | 0.039  | -0.002 | -0.027 | 0.815  | 0.012  | -0.009 | -0.009 | 0.039  | 0.037  | 0.180  |
| <b>MSPD7a</b>  | 0.024  | 0.109  | 0.046  | 0.629  | 0.088  | -0.014 | 0.019  | -0.019 | 0.072  | -0.020 | -0.001 | 0.077  | -0.053 |
| <b>MSPD7b</b>  | 0.005  | 0.019  | 0.008  | 0.080  | 0.566  | 0.006  | 0.022  | 0.006  | -0.058 | 0.036  | 0.209  | -0.114 | 0.025  |
| <b>MSPD7c</b>  | -0.021 | -0.006 | 0.025  | -0.015 | 0.089  | 0.298  | 0.301  | 0.031  | -0.038 | 0.042  | 0.207  | 0.201  | -0.046 |
| <b>MSPD7d</b>  | -0.033 | 0.014  | 0.050  | 0.033  | 0.027  | 0.285  | 0.344  | 0.010  | -0.032 | 0.056  | 0.209  | 0.154  | 0.008  |
| <b>MSPD7e</b>  | -0.059 | -0.022 | -0.009 | 0.043  | 0.055  | 0.157  | 0.279  | 0.008  | -0.001 | -0.001 | 0.273  | 0.125  | 0.226  |
| <b>MSPD8a</b>  | 0.064  | 0.172  | 0.004  | 0.539  | 0.136  | -0.037 | 0.067  | 0.028  | -0.036 | -0.118 | 0.080  | 0.037  | 0.040  |
| <b>MSPD8b</b>  | 0.023  | 0.112  | -0.025 | 0.092  | 0.535  | -0.068 | 0.078  | -0.020 | 0.037  | -0.025 | 0.288  | -0.016 | 0.008  |
| <b>MSPD8c</b>  | 0.025  | 0.030  | -0.023 | -0.041 | 0.013  | 0.053  | 0.002  | 0.029  | -0.026 | 0.008  | 0.899  | 0.064  | -0.072 |
| <b>MSPD8d</b>  | 0.002  | 0.017  | 0.016  | 0.007  | -0.013 | 0.032  | 0.028  | 0.011  | -0.022 | 0.034  | 0.906  | 0.056  | -0.042 |
| <b>MSPD8e</b>  | -0.033 | -0.013 | 0.006  | 0.021  | 0.032  | -0.019 | -0.016 | -0.038 | 0.030  | 0.026  | 0.879  | 0.050  | 0.109  |
| <b>MSPD9a</b>  | -0.029 | 0.155  | 0.067  | 0.493  | 0.107  | -0.127 | -0.043 | 0.048  | -0.031 | -0.080 | -0.120 | 0.387  | 0.077  |
| <b>MSPD9b</b>  | 0.031  | 0.135  | -0.009 | -0.011 | 0.515  | -0.079 | 0.005  | 0.018  | 0.037  | 0.031  | -0.026 | 0.393  | -0.021 |
| <b>MSPD9c</b>  | 0.017  | -0.002 | -0.001 | -0.051 | 0.001  | 0.061  | 0.047  | 0.008  | -0.008 | 0.041  | 0.126  | 0.838  | -0.047 |
| <b>MSPD9d</b>  | 0.003  | 0.005  | 0.016  | -0.006 | -0.035 | 0.056  | 0.077  | 0.011  | -0.002 | 0.039  | 0.115  | 0.828  | -0.017 |
| <b>MSPD9e</b>  | -0.004 | 0.026  | 0.015  | -0.003 | -0.029 | 0.039  | 0.063  | -0.023 | 0.039  | 0.024  | 0.101  | 0.740  | 0.131  |
| <b>MSPD10a</b> | -0.016 | 0.788  | 0.018  | 0.095  | 0.036  | 0.021  | -0.013 | 0.007  | -0.019 | -0.006 | -0.004 | 0.081  | 0.016  |

|                |        |       |        |        |        |        |        |        |        |        |        |        |        |
|----------------|--------|-------|--------|--------|--------|--------|--------|--------|--------|--------|--------|--------|--------|
| <b>MSPD10b</b> | -0.081 | 0.803 | 0.034  | 0.058  | 0.047  | 0.025  | -0.036 | -0.005 | -0.001 | 0.005  | -0.036 | 0.139  | -0.011 |
| <b>MSPD10c</b> | -0.069 | 0.827 | 0.053  | 0.001  | -0.035 | 0.022  | 0.044  | -0.034 | 0.045  | -0.027 | -0.031 | 0.043  | -0.019 |
| <b>MSPD10d</b> | -0.069 | 0.810 | 0.015  | -0.092 | 0.023  | -0.004 | 0.028  | 0.014  | -0.029 | 0.108  | -0.042 | -0.049 | -0.065 |
| <b>MSPD10e</b> | -0.026 | 0.664 | -0.050 | 0.004  | -0.005 | 0.070  | 0.038  | -0.003 | 0.054  | 0.060  | -0.012 | 0.002  | -0.128 |
| <b>MSPD10f</b> | 0.053  | 0.844 | -0.060 | 0.073  | -0.066 | 0.025  | -0.019 | -0.003 | -0.015 | -0.011 | 0.038  | -0.055 | 0.055  |
| <b>MSPD10g</b> | -0.007 | 0.796 | -0.036 | -0.067 | -0.028 | -0.003 | 0.049  | -0.019 | 0.038  | 0.027  | -0.046 | -0.082 | -0.015 |
| <b>MSPD10h</b> | 0.035  | 0.776 | -0.044 | 0.024  | 0.035  | -0.075 | -0.027 | 0.030  | -0.022 | 0.016  | 0.098  | 0.013  | 0.071  |
| <b>MSPD10i</b> | 0.024  | 0.793 | -0.000 | -0.007 | 0.050  | -0.005 | 0.017  | -0.028 | -0.014 | -0.019 | 0.046  | -0.001 | 0.025  |
| <b>MSPD10j</b> | 0.125  | 0.697 | -0.097 | 0.054  | 0.014  | 0.019  | 0.009  | 0.039  | -0.050 | -0.046 | 0.090  | -0.063 | 0.018  |

---

Table SF90: EFA for Prolific Cisgender Sample (Excluding Supplementary Items): 13 Factors Using Oblimin Rotation.

Upon comparing the structures of the Tables SF90 and SF82, several similarities and differences emerge regarding how the items are grouped within each factor. When considering only cisgender individuals in the analysis, we can see in Table SF90 that also the MSPD1b-8b items exceed the threshold of 0.40, but the items SOQ1a and SOQ3a not. In the remaining factors, we can see the same structure in both tables.

#### 5.4. Exploratory Factor Analysis - Excluding Supplementary Items - Non-cisgender

| Factors | Eigenvalues | VAR    | CUM    |
|---------|-------------|--------|--------|
| 1       | 6.0582      | 0.0600 | 0.0600 |
| 2       | 4.7119      | 0.0467 | 0.1066 |
| 3       | 4.5706      | 0.0453 | 0.1519 |
| 4       | 3.8509      | 0.0381 | 0.1900 |
| 5       | 3.3627      | 0.0333 | 0.2233 |
| 6       | 3.3095      | 0.0328 | 0.2561 |
| 7       | 2.9217      | 0.0289 | 0.2850 |
| 8       | 2.8847      | 0.0286 | 0.3136 |
| 9       | 2.7241      | 0.0270 | 0.3405 |
| 10      | 2.6020      | 0.0258 | 0.3663 |
| 11      | 2.4830      | 0.0246 | 0.3909 |
| 12      | 2.4752      | 0.0245 | 0.4154 |
| 13      | 2.3093      | 0.0229 | 0.4383 |

Table SF91: Factors, Eigenvalues, Variance Explained, and Cumulative Variance for Prolific Non-cisgender Sample: Excluding Supplementary Items, 13 Factors (Oblimin Rotation).

| Factor | Items                                                                                    |
|--------|------------------------------------------------------------------------------------------|
| F1     | MSPD10a, MSPD10b, MSPD10c, MSPD10d, MSPD10e, MSPD10f, MSPD10g, MSPD10h, MSPD10i, MSPD10j |
| F2     | MSPD1a, MSPD2a, MSPD3a, MSPD4a, MSPD5a, MSPD6a, MSPD7a, MSPD8a, MSPD9a                   |
| F3     | SOQ1b, SOQ1c, SOQ1d, SOQ1e, SOQ3b, SOQ3b, SOQ3c, SOQ3d, SOQ3e                            |
| F4     | MIQ1, TCS1, TCS2, TCS3, TCS4, TCS5                                                       |
| F5     | MSPD1b, MSPD2b, MSPD3b, MSP4b, MSPD5b, MSP6b, MSPD7b                                     |
| F6     | MSPD8c, MSPD8d, MSPD8e                                                                   |
| F7     | SOQ1a, SOQ2a, SOQ3a                                                                      |
| F8     | MSPD9c, MSPD9d, MSPD9e                                                                   |
| F9     | SOQ2b, SOQ2c, SOQ2d, SOQ2e                                                               |
| F10    | MSPD6c, MSPD6d, MSPD6e                                                                   |
| F11    | MSPD2c, MSPD3c, MSPD4c, MSPD4d, MSPD4e                                                   |
| F12    | MSPD1c, MSPD1d, MSPD1e, MSPD2d, MSPD2e, MSPD7d                                           |
| F13    | MSPD5c, MSPD5d, MSPD5e                                                                   |

Table SF92: Prolific Non-cisgender Sample: Factor Structure and Items (13 Factors and Oblimin Rotation).

| Items         | F1     | F2     | F3     | F4     | F5     | F6     | F7     | F8     | F9     | F10    | F11    | F12    | F13    |
|---------------|--------|--------|--------|--------|--------|--------|--------|--------|--------|--------|--------|--------|--------|
| <b>MIQ1</b>   | -0.070 | -0.084 | -0.014 | 0.503  | -0.030 | 0.014  | 0.010  | 0.106  | 0.191  | 0.066  | 0.061  | -0.117 | 0.008  |
| <b>MIQ3</b>   | 0.114  | -0.040 | -0.097 | 0.092  | 0.092  | -0.016 | 0.122  | -0.070 | 0.079  | -0.069 | -0.083 | -0.036 | 0.086  |
| <b>MIQ4</b>   | -0.114 | 0.072  | 0.104  | 0.050  | -0.004 | 0.040  | -0.109 | 0.132  | -0.047 | 0.071  | 0.063  | 0.027  | -0.096 |
| <b>MIQ5</b>   | -0.060 | 0.123  | 0.143  | 0.003  | -0.123 | -0.007 | -0.199 | 0.130  | 0.167  | 0.045  | 0.020  | -0.020 | -0.029 |
| <b>MIQ6</b>   | 0.079  | -0.006 | -0.116 | -0.309 | 0.076  | 0.001  | -0.068 | -0.062 | 0.214  | -0.071 | -0.036 | 0.042  | 0.004  |
| <b>MIQ7</b>   | 0.056  | -0.073 | -0.140 | -0.304 | 0.112  | 0.027  | -0.090 | -0.052 | 0.244  | 0.020  | 0.022  | 0.102  | -0.107 |
| <b>MIQ9</b>   | 0.048  | 0.086  | 0.067  | -0.470 | -0.096 | 0.054  | -0.028 | 0.106  | 0.167  | 0.007  | 0.189  | -0.074 | -0.101 |
| <b>MIQ10</b>  | 0.101  | 0.104  | 0.147  | -0.337 | -0.144 | 0.024  | -0.052 | 0.173  | 0.108  | -0.032 | 0.200  | -0.120 | -0.092 |
| <b>TCS1</b>   | 0.044  | 0.074  | -0.048 | 0.726  | -0.044 | 0.011  | -0.005 | 0.010  | -0.096 | -0.040 | 0.030  | 0.013  | -0.051 |
| <b>TCS2</b>   | 0.024  | 0.010  | -0.029 | 0.845  | -0.009 | -0.009 | 0.000  | -0.022 | -0.065 | -0.024 | -0.038 | 0.010  | -0.025 |
| <b>TCS3</b>   | -0.038 | 0.005  | -0.000 | 0.824  | 0.008  | -0.016 | 0.019  | -0.049 | -0.053 | -0.031 | -0.019 | 0.034  | 0.030  |
| <b>TCS4</b>   | -0.075 | -0.010 | 0.045  | 0.692  | 0.027  | 0.044  | -0.035 | 0.065  | 0.154  | 0.067  | 0.048  | -0.061 | -0.017 |
| <b>TCS5</b>   | 0.014  | -0.045 | 0.079  | 0.610  | -0.032 | 0.011  | -0.004 | 0.157  | 0.067  | 0.103  | 0.147  | -0.053 | -0.042 |
| <b>OSRI1</b>  | 0.089  | 0.203  | -0.062 | 0.013  | -0.090 | 0.104  | -0.016 | 0.012  | 0.142  | -0.024 | -0.051 | 0.051  | -0.051 |
| <b>OSRI2</b>  | 0.172  | 0.028  | -0.120 | 0.166  | 0.111  | -0.044 | 0.126  | -0.010 | 0.125  | 0.080  | 0.059  | -0.012 | -0.059 |
| <b>OSRI3</b>  | 0.025  | -0.053 | 0.100  | -0.128 | 0.189  | 0.050  | 0.059  | 0.029  | 0.054  | -0.031 | 0.049  | 0.110  | -0.001 |
| <b>OSRI4</b>  | 0.077  | -0.021 | 0.011  | 0.011  | 0.126  | 0.045  | 0.053  | -0.029 | 0.011  | -0.044 | -0.005 | 0.057  | -0.026 |
| <b>OSRI5</b>  | -0.046 | 0.118  | 0.084  | -0.006 | -0.178 | -0.000 | -0.067 | 0.100  | -0.059 | -0.051 | -0.117 | -0.134 | -0.017 |
| <b>OSRI6</b>  | 0.042  | 0.188  | 0.006  | 0.044  | 0.014  | 0.098  | -0.123 | 0.028  | 0.166  | -0.027 | -0.027 | 0.023  | -0.051 |
| <b>OSRI7</b>  | 0.179  | -0.055 | -0.156 | 0.136  | 0.054  | -0.044 | 0.147  | -0.036 | 0.120  | -0.034 | -0.030 | -0.046 | 0.047  |
| <b>OSRI8</b>  | 0.104  | 0.223  | -0.001 | 0.015  | -0.053 | 0.065  | -0.105 | -0.006 | 0.002  | -0.040 | -0.068 | -0.029 | -0.076 |
| <b>OSRI9</b>  | 0.107  | 0.019  | -0.060 | -0.127 | 0.056  | 0.056  | 0.024  | 0.031  | 0.170  | 0.042  | -0.082 | -0.035 | 0.134  |
| <b>OSRI10</b> | 0.032  | 0.202  | 0.061  | -0.064 | 0.050  | 0.007  | 0.034  | -0.001 | 0.002  | -0.075 | -0.002 | 0.014  | -0.019 |
| <b>OSRI11</b> | 0.103  | 0.054  | 0.018  | 0.029  | 0.101  | 0.077  | 0.134  | -0.083 | 0.195  | -0.027 | 0.012  | -0.034 | 0.055  |
| <b>OSRI12</b> | 0.074  | -0.069 | -0.101 | 0.052  | 0.171  | 0.049  | 0.165  | -0.133 | 0.154  | 0.053  | 0.010  | 0.048  | -0.010 |
| <b>OSRI13</b> | 0.057  | 0.223  | 0.017  | 0.116  | -0.087 | -0.031 | -0.186 | 0.034  | 0.169  | 0.078  | -0.035 | 0.005  | -0.040 |
| <b>OSRI14</b> | 0.136  | 0.047  | -0.149 | 0.203  | 0.039  | -0.031 | 0.169  | -0.077 | 0.096  | 0.035  | 0.026  | -0.011 | -0.010 |
| <b>OSRI15</b> | 0.110  | 0.218  | -0.007 | 0.020  | 0.007  | -0.019 | -0.126 | -0.040 | 0.172  | -0.062 | -0.009 | 0.062  | 0.004  |
| <b>OSRI16</b> | 0.160  | 0.065  | -0.195 | 0.163  | 0.045  | 0.009  | 0.149  | -0.119 | 0.185  | -0.054 | 0.019  | -0.011 | 0.065  |
| <b>OSRI17</b> | 0.057  | 0.192  | 0.031  | 0.058  | 0.027  | -0.038 | -0.045 | 0.067  | 0.040  | -0.026 | -0.013 | -0.072 | -0.001 |

|               |        |        |        |        |        |        |        |        |        |        |        |        |        |
|---------------|--------|--------|--------|--------|--------|--------|--------|--------|--------|--------|--------|--------|--------|
| <b>OSRI18</b> | 0.139  | -0.061 | -0.097 | 0.086  | 0.158  | 0.019  | 0.126  | -0.134 | 0.171  | 0.071  | 0.057  | 0.034  | -0.008 |
| <b>SOQ1a</b>  | -0.017 | 0.016  | 0.147  | 0.027  | -0.010 | 0.017  | 0.796  | -0.002 | -0.020 | -0.003 | 0.001  | 0.052  | 0.019  |
| <b>SOQ1b</b>  | 0.032  | 0.012  | 0.610  | -0.013 | -0.019 | 0.005  | 0.303  | -0.008 | 0.126  | 0.044  | -0.059 | 0.055  | -0.033 |
| <b>SOQ1c</b>  | -0.031 | 0.030  | 0.620  | 0.061  | -0.024 | -0.029 | -0.453 | 0.006  | 0.054  | -0.025 | -0.009 | 0.059  | -0.015 |
| <b>SOQ1d</b>  | 0.053  | -0.003 | 0.685  | -0.025 | -0.072 | -0.048 | 0.093  | -0.019 | 0.156  | 0.048  | -0.017 | 0.039  | -0.029 |
| <b>SOQ1e</b>  | 0.032  | -0.074 | 0.488  | -0.020 | -0.019 | -0.036 | 0.062  | 0.026  | 0.261  | 0.010  | 0.050  | 0.086  | -0.060 |
| <b>SOQ2a</b>  | -0.001 | 0.055  | -0.131 | 0.050  | -0.042 | 0.051  | 0.695  | 0.032  | 0.290  | -0.003 | -0.001 | -0.008 | -0.012 |
| <b>SOQ2b</b>  | 0.042  | 0.035  | 0.009  | -0.015 | 0.018  | 0.073  | 0.265  | -0.004 | 0.687  | 0.038  | -0.001 | 0.008  | -0.053 |
| <b>SOQ2c</b>  | -0.001 | 0.069  | 0.175  | -0.012 | -0.029 | 0.008  | -0.510 | -0.027 | 0.426  | -0.034 | -0.008 | 0.057  | 0.069  |
| <b>SOQ2d</b>  | 0.029  | 0.007  | 0.133  | -0.091 | 0.001  | -0.023 | -0.104 | -0.010 | 0.746  | 0.031  | 0.012  | -0.037 | 0.061  |
| <b>SOQ2e</b>  | 0.022  | -0.080 | 0.024  | -0.070 | 0.090  | 0.001  | -0.063 | 0.046  | 0.755  | -0.017 | 0.030  | 0.025  | 0.010  |
| <b>SOQ3a</b>  | -0.028 | 0.015  | 0.352  | -0.025 | 0.024  | 0.012  | 0.740  | -0.020 | -0.119 | -0.014 | 0.026  | 0.010  | 0.065  |
| <b>SOQ3b</b>  | 0.018  | -0.001 | 0.825  | -0.033 | 0.038  | 0.043  | 0.273  | -0.009 | -0.035 | 0.024  | -0.004 | -0.041 | 0.027  |
| <b>SOQ3c</b>  | -0.033 | 0.051  | 0.808  | 0.036  | 0.015  | 0.023  | -0.381 | 0.000  | -0.064 | -0.049 | 0.004  | 0.004  | 0.025  |
| <b>SOQ3d</b>  | 0.016  | 0.017  | 0.868  | -0.053 | 0.002  | 0.023  | 0.115  | -0.035 | 0.006  | 0.033  | -0.009 | -0.042 | 0.024  |
| <b>SOQ3e</b>  | 0.045  | -0.046 | 0.717  | -0.065 | 0.040  | -0.014 | 0.065  | 0.050  | 0.125  | -0.036 | 0.039  | -0.016 | -0.007 |
| <b>MSPD1a</b> | 0.045  | 0.656  | 0.015  | 0.043  | 0.026  | -0.018 | -0.021 | -0.037 | -0.024 | -0.107 | 0.037  | 0.002  | 0.035  |
| <b>MSPD1b</b> | 0.029  | -0.011 | 0.017  | -0.043 | 0.568  | 0.039  | 0.036  | 0.014  | 0.053  | -0.018 | -0.071 | 0.221  | 0.008  |
| <b>MSPD1c</b> | 0.078  | -0.019 | 0.029  | 0.031  | 0.167  | 0.102  | 0.006  | 0.222  | 0.010  | -0.041 | 0.243  | 0.390  | -0.000 |
| <b>MSPD1d</b> | 0.060  | 0.046  | -0.008 | 0.012  | 0.099  | 0.111  | 0.026  | 0.068  | -0.061 | 0.075  | -0.007 | 0.629  | 0.020  |
| <b>MSPD1e</b> | 0.035  | 0.016  | 0.031  | 0.027  | 0.122  | 0.091  | 0.049  | 0.074  | 0.031  | 0.030  | 0.015  | 0.442  | 0.284  |
| <b>MSPD2a</b> | -0.027 | 0.756  | 0.027  | -0.035 | -0.064 | -0.019 | 0.028  | 0.015  | -0.042 | 0.023  | -0.039 | 0.078  | -0.004 |
| <b>MSPD2b</b> | 0.006  | -0.062 | 0.025  | -0.001 | 0.669  | 0.015  | 0.010  | 0.044  | 0.051  | -0.018 | 0.162  | 0.201  | 0.010  |
| <b>MSPD2c</b> | 0.001  | -0.079 | 0.010  | -0.052 | 0.113  | 0.013  | 0.002  | 0.172  | 0.040  | 0.026  | 0.425  | 0.329  | 0.056  |
| <b>MSPD2d</b> | 0.040  | -0.013 | -0.003 | -0.087 | 0.045  | 0.021  | 0.001  | 0.086  | -0.035 | 0.131  | 0.220  | 0.585  | 0.044  |
| <b>MSPD2e</b> | 0.011  | -0.060 | -0.009 | -0.027 | 0.066  | 0.006  | 0.026  | 0.104  | 0.067  | 0.082  | 0.181  | 0.433  | 0.273  |
| <b>MSPD3a</b> | 0.009  | 0.765  | -0.005 | 0.035  | -0.015 | 0.022  | -0.025 | -0.055 | 0.053  | -0.039 | -0.114 | 0.093  | -0.005 |
| <b>MSPD3b</b> | 0.008  | -0.072 | 0.010  | 0.042  | 0.639  | -0.036 | -0.001 | 0.071  | 0.026  | 0.025  | 0.174  | 0.117  | 0.050  |
| <b>MSPD3c</b> | -0.016 | -0.102 | -0.040 | 0.007  | 0.064  | 0.035  | -0.019 | 0.134  | 0.110  | 0.145  | 0.395  | 0.223  | 0.109  |
| <b>MSPD3d</b> | 0.055  | -0.044 | -0.059 | -0.019 | -0.043 | 0.006  | -0.013 | 0.039  | 0.086  | 0.228  | 0.138  | 0.475  | 0.135  |
| <b>MSPD3e</b> | 0.046  | -0.048 | -0.060 | 0.021  | -0.016 | -0.006 | 0.048  | 0.112  | 0.138  | 0.153  | 0.085  | 0.289  | 0.420  |

|                |        |        |        |        |        |        |        |        |        |        |        |        |        |
|----------------|--------|--------|--------|--------|--------|--------|--------|--------|--------|--------|--------|--------|--------|
| <b>MSPD4a</b>  | -0.012 | 0.760  | -0.018 | 0.033  | 0.005  | 0.017  | -0.019 | -0.085 | 0.008  | -0.092 | 0.076  | 0.031  | 0.037  |
| <b>MSPD4b</b>  | 0.004  | 0.004  | -0.030 | -0.014 | 0.568  | 0.048  | 0.003  | 0.029  | 0.090  | 0.068  | 0.305  | -0.024 | 0.081  |
| <b>MSPD4c</b>  | 0.058  | -0.012 | 0.000  | 0.016  | 0.057  | 0.055  | 0.019  | 0.042  | -0.001 | 0.082  | 0.835  | 0.003  | 0.062  |
| <b>MSPD4d</b>  | 0.066  | 0.018  | -0.005 | -0.018 | 0.004  | 0.055  | -0.010 | 0.020  | -0.003 | 0.113  | 0.718  | 0.118  | 0.097  |
| <b>MSPD4e</b>  | 0.063  | -0.040 | -0.046 | 0.019  | 0.013  | 0.039  | 0.029  | -0.027 | 0.112  | 0.161  | 0.418  | 0.140  | 0.310  |
| <b>MSPD5a</b>  | -0.062 | 0.754  | -0.031 | -0.040 | 0.008  | -0.040 | 0.004  | 0.038  | -0.041 | -0.016 | 0.144  | -0.109 | 0.081  |
| <b>MSPD5b</b>  | 0.070  | 0.131  | 0.040  | -0.038 | 0.607  | 0.016  | -0.044 | -0.010 | -0.000 | 0.018  | -0.091 | -0.055 | 0.347  |
| <b>MSPD5c</b>  | 0.040  | -0.001 | 0.011  | -0.045 | 0.048  | 0.078  | -0.016 | 0.155  | -0.056 | 0.067  | 0.232  | -0.002 | 0.577  |
| <b>MSPD5d</b>  | 0.073  | -0.004 | 0.007  | -0.066 | 0.009  | 0.085  | -0.018 | 0.070  | -0.083 | 0.131  | 0.099  | 0.133  | 0.577  |
| <b>MSPD5e</b>  | 0.035  | 0.001  | 0.009  | 0.002  | 0.016  | 0.043  | 0.025  | 0.091  | 0.034  | 0.085  | 0.026  | 0.005  | 0.854  |
| <b>MSPD6a</b>  | -0.020 | 0.738  | 0.034  | -0.020 | -0.006 | 0.016  | 0.024  | -0.118 | 0.015  | 0.132  | -0.124 | -0.005 | -0.045 |
| <b>MSPD6b</b>  | 0.042  | 0.036  | -0.019 | -0.062 | 0.645  | 0.007  | -0.027 | -0.022 | -0.011 | 0.438  | -0.006 | -0.111 | -0.076 |
| <b>MSPD6c</b>  | 0.018  | -0.046 | 0.008  | -0.001 | 0.061  | 0.034  | -0.018 | 0.066  | 0.015  | 0.786  | 0.170  | -0.060 | 0.013  |
| <b>MSPD6d</b>  | 0.025  | -0.001 | 0.007  | -0.003 | -0.011 | 0.025  | -0.023 | 0.038  | -0.029 | 0.872  | 0.021  | 0.127  | 0.003  |
| <b>MSPD6e</b>  | 0.061  | -0.024 | 0.019  | 0.026  | 0.012  | 0.031  | 0.024  | 0.022  | 0.037  | 0.763  | -0.037 | 0.020  | 0.213  |
| <b>MSPD7a</b>  | 0.062  | 0.506  | 0.018  | -0.001 | 0.008  | -0.040 | 0.040  | 0.091  | -0.031 | -0.002 | 0.173  | -0.063 | -0.017 |
| <b>MSPD7b</b>  | -0.001 | 0.095  | -0.001 | -0.085 | 0.491  | 0.087  | -0.012 | 0.030  | 0.060  | 0.076  | -0.102 | 0.073  | -0.024 |
| <b>MSPD7c</b>  | 0.023  | -0.018 | 0.009  | -0.094 | 0.044  | 0.109  | -0.007 | 0.337  | 0.069  | 0.065  | 0.178  | 0.256  | 0.012  |
| <b>MSPD7d</b>  | -0.019 | 0.046  | -0.006 | -0.060 | 0.024  | 0.133  | -0.002 | 0.233  | 0.029  | 0.206  | 0.038  | 0.395  | 0.044  |
| <b>MSPD7e</b>  | 0.014  | 0.036  | 0.015  | -0.034 | 0.034  | 0.128  | -0.007 | 0.202  | 0.064  | 0.146  | 0.010  | 0.330  | 0.178  |
| <b>MSPD8a</b>  | 0.079  | 0.537  | -0.021 | -0.034 | 0.110  | 0.057  | 0.067  | 0.066  | -0.033 | 0.006  | 0.039  | -0.017 | -0.104 |
| <b>MSPD8b</b>  | 0.095  | 0.146  | -0.061 | -0.005 | 0.383  | 0.553  | 0.009  | 0.017  | 0.012  | -0.070 | 0.003  | -0.070 | -0.068 |
| <b>MSPD8c</b>  | -0.002 | -0.041 | 0.009  | -0.012 | -0.010 | 0.967  | -0.000 | 0.014  | -0.011 | -0.031 | 0.038  | -0.042 | -0.015 |
| <b>MSPD8d</b>  | -0.009 | -0.005 | 0.008  | 0.009  | -0.033 | 0.987  | -0.006 | -0.004 | -0.017 | 0.026  | -0.029 | 0.031  | -0.007 |
| <b>MSPD8e</b>  | -0.004 | -0.004 | 0.004  | 0.012  | -0.042 | 0.931  | -0.002 | -0.002 | 0.023  | 0.019  | -0.007 | 0.013  | 0.052  |
| <b>MSPD9a</b>  | 0.079  | 0.587  | -0.024 | 0.027  | 0.073  | -0.096 | 0.068  | 0.190  | 0.022  | 0.046  | -0.032 | -0.074 | -0.076 |
| <b>MSPD9b</b>  | 0.077  | 0.099  | 0.025  | 0.028  | 0.510  | 0.029  | 0.003  | 0.452  | 0.032  | -0.016 | -0.059 | -0.044 | -0.013 |
| <b>MSPD9c</b>  | 0.001  | -0.051 | -0.001 | -0.002 | 0.034  | 0.043  | -0.000 | 0.887  | -0.006 | 0.017  | 0.079  | -0.032 | 0.009  |
| <b>MSPD9d</b>  | 0.039  | -0.011 | -0.024 | 0.006  | -0.030 | 0.050  | -0.008 | 0.821  | -0.034 | 0.069  | -0.049 | 0.080  | 0.063  |
| <b>MSPD9e</b>  | 0.056  | -0.038 | -0.018 | 0.049  | -0.018 | 0.055  | 0.028  | 0.692  | 0.057  | 0.042  | -0.034 | 0.080  | 0.175  |
| <b>MSPD10a</b> | 0.846  | -0.018 | -0.007 | -0.027 | -0.022 | -0.007 | -0.026 | 0.016  | -0.034 | 0.065  | 0.008  | 0.040  | -0.039 |

|                |       |        |        |        |        |        |        |        |        |        |        |        |        |
|----------------|-------|--------|--------|--------|--------|--------|--------|--------|--------|--------|--------|--------|--------|
| <b>MSPD10b</b> | 0.875 | -0.018 | -0.031 | 0.042  | -0.020 | 0.008  | -0.011 | 0.000  | -0.037 | 0.033  | -0.018 | 0.006  | -0.008 |
| <b>MSPD10c</b> | 0.676 | -0.028 | 0.028  | 0.002  | 0.025  | 0.002  | 0.024  | -0.052 | 0.009  | -0.027 | -0.067 | 0.010  | 0.041  |
| <b>MSPD10d</b> | 0.711 | 0.019  | -0.012 | 0.071  | 0.054  | -0.028 | 0.019  | -0.049 | 0.077  | -0.050 | 0.033  | -0.051 | 0.046  |
| <b>MSPD10e</b> | 0.614 | -0.011 | 0.012  | -0.003 | 0.028  | -0.003 | -0.041 | -0.059 | 0.111  | 0.010  | -0.016 | -0.038 | 0.043  |
| <b>MSPD10f</b> | 0.828 | 0.055  | 0.005  | -0.038 | -0.065 | 0.005  | -0.021 | -0.010 | -0.005 | -0.015 | 0.006  | -0.001 | 0.027  |
| <b>MSPD10g</b> | 0.621 | -0.009 | 0.037  | 0.020  | 0.095  | -0.079 | 0.007  | -0.113 | 0.029  | -0.005 | -0.048 | -0.064 | 0.124  |
| <b>MSPD10h</b> | 0.764 | -0.025 | 0.020  | -0.072 | 0.004  | 0.030  | 0.016  | 0.053  | -0.046 | 0.009  | 0.059  | 0.002  | -0.070 |
| <b>MSPD10i</b> | 0.805 | -0.015 | 0.028  | -0.002 | -0.005 | 0.002  | 0.034  | 0.111  | -0.008 | -0.015 | 0.047  | 0.006  | -0.018 |
| <b>MSPD10j</b> | 0.748 | 0.033  | 0.028  | -0.024 | -0.030 | 0.050  | -0.074 | 0.011  | 0.009  | -0.013 | -0.015 | 0.027  | -0.003 |

Table SF93: EFA for Prolific Non-cisgender Sample (Excluding Supplementary Items): 13 Factors Using Oblimin Rotation.

Upon comparing the structures of the Tables SF93 and SF82, several similarities and differences emerge regarding how the items are grouped within each factor. When considering only cisgender individuals in the analysis, we can see in Table SF93 that also the MSPD1b-7b items load onto one factor as they exceed the threshold of 0.40. Also MSPD5c-e load onto another factor and SOQ1a-3a form another factor while the remaining items of SOQ1 and SO3 converge into one factor. In the remaining factors, we can see the same structure in both tables.

## 5.5. Inclusion of Supplementary Items

Table SF87 shows the factor loadings of all the items in our dataset without the supplementary items and Table SF97 shows the factor loadings of all items in our dataset including the supplementary items. Note that they exhibit both similarities and differences. The inclusion of supplementary items in Table SF97 alters the order and arrangement of the factors compared to Table SF87. In Table SF97, factors like F1 become more comprehensive. For example, F1 in Table SF97 combines items such as MSPD1c-e, MSPD2c-e, MSPD3c-e, MSPD5d-e, MSPD7e along with the items MSPD5c and MSPD4c-e. In contrast, in Table SF87, these items are distributed across multiple factors, such as F6 and F12, leading to a reorganization of the groupings. Similarly, F2 in Table SF97 includes MSPD10a-l, incorporating the supplementary items MSPD10k and MSPD10l.

Without these supplementary items in Table SF87, this factor comprises the items MSPD10a-j, keeping the same structure. Another significant difference occurs in F3 of Table SF97, which contains SOQ items such as SOQ1b, SOQ1d, SOQ1e, SOQ3b, SOQ3d, SOQ3e, and the supplementary items SOQ4c-4e. In Table SF87, the absence of SOQ4a-e and SOQ5a-e results in the remaining SOQ items being reallocated to other factors, such as F5 and F10. Similarly, in F4 of Table SF97, the inclusion of supplementary items like TCS6, TCS7, and OSRI20 expands this factor to cover more TCS and OSRI constructs. Without these supplementary items in Table SF87, F4 is limited to fewer TCS items, specifically TCS1–TCS5.

The inclusion of supplementary items also leads to a reordering of factors. For example, F1 in Table SF87, which focuses on MSPD10a-j, shifts to F2 in Table SF97, since the inclusion of supplementary items allows for the creation of a new primary factor. Other factors, such as F6 and F12 in Table SF87 are merged into F1 in Table SF97. Furthermore, the inclusion of supplementary items changes the underlying constructs represented by the factors, leading to renumbering and broader definitions. For example, SOQ4a-e and SOQ5a-e contribute to richer factor definitions in Table SF97, such as F3, but their absence in Table SF87 leads to narrower factors such as F5 and F10. Similarly, TCS6 and OSRI20 enhance F4 in Table SF97, while their exclusion simplifies the corresponding factor in Table SF87. Overall, the inclusion of supplementary items in Table SF97 results in larger, more comprehensive factors, which implies an altered prioritization and a renumbering of the factors and a new structure for Table SF87.

## 5.6. Exploratory Factor Analysis - All Items

We conducted an EFA including the supplementary items to compare with the results discussed in section 4.2.

### **Factor 1 Perception of discrimination against non-cisgender individuals**

MSPD1c: In society, transwomen are visibly rejected.

MSPD1d: In society, transmen are visibly rejected.

MSPD1e: In society, non-binary individuals are visibly rejected.

MSPD2c: Society treats transwomen unfairly.

MSPD2d: Society treats transmen unfairly.

MSPD2e: Society treats non-binary individuals unfairly.

MSPD3c: Transwomen suffer from occupational discrimination.

MSPD3d: Transmen suffer from occupational discrimination.

MSPD3e: Non-binary individuals suffer from occupational discrimination.

MSPD4c: Transwomen suffer from discrimination in the health sphere.

MSPD4d: Transmen suffer from discrimination in the health sphere.

MSPD4e: Non-binary individuals suffer from discrimination in the health sphere.

MSPD5c: Transwomen suffer from rejection in their daily social relations.

MSPD5d: Transmen suffer from rejection in their daily social relations.

MSPD5e: Non-binary individuals suffer from rejection in their daily social relations.

MSPD7e: Society mistrusts non-binary individuals.

### **Factor 2 Personal discrimination experience**

MSPD10a: I have felt personally rejected for being a (gender).

MSPD10b: I have been treated unfairly for being a (gender).

MSPD10c: I have been discriminated at work for being a (gender).

MSPD10d: I have been discriminated in the health sphere for being a (gender).

MSPD10e: I have been discriminated in the legal sphere for being a (gender).  
MSPD10f: I have been rejected in my daily social relations for being a (gender).  
MSPD10g: I have been the target of discriminatory actions by some private institutions (e.g., banks, insurance companies, etc.) for being a (gender).  
MSPD10h: Even when people seem to accept me, deep down, I think they have some misgivings because I am a (gender).  
MSPD10i: Even though there is no express rejection, people treat me differently when they see I am a (gender).  
MSPD10j: I feel that people mistrust me for being a (gender).  
MSPD10k: I feel discriminated by others based on my gender.  
MSPD10l: If I think about how I am perceived by others, others discriminate against me because I am a (gender).

### **Factor 3 Satisfaction with personal gender identity**

MIQ1: In the past 12 months, have you felt satisfied being a (gender)?  
MIQ11: In the past 12 months, have you felt contentment with your own gender?  
TCS1: My outward appearance represents my gender identity.  
TCS2: I am happy with the way my appearance expresses my gender identity.  
TCS3: I feel that my mind and body are consistent with one another.  
TCS4: I am happy that I have the gender identity that I do.  
TCS5: I have accepted my gender identity.  
TCS6: My external gender identity (e.g., my body, outward appearance, or how I dress) represents my gender identity.  
OSRI20: My gender identity matches contemporary gender stereotypes assigned by friends, family, co-workers, and others, as well as those imposed by political, educational, media, medical, cultural and social institutions.

### **Factor 4 Perception and expression of own gender as male**

MIQ4: In the past 12 months, have you worn the clothes typically associated with males, such as pants or suits?  
MIQ5: In the past 12 months, have you felt more like a man than like a woman?  
MIQ13: If you think about the self-perception of your gender, how much do you feel as a man?  
TCS8: If I think about the external representation of my gender, I feel like a man.

### **Factor 5 Extent of romantic and sexual activities with non-cisgender individuals**

SOQ1b: In the past 12 months, has/have your romantic relationship(s) been with transmen?  
SOQ1d: In the past 12 months, has/have your romantic relationship(s) been with transwomen?  
SOQ1e: In the past 12 months, has/have your romantic relationship(s) been with non-binary individuals?  
SOQ3b: In the past 12 months, when you had sex, was it with transmen?  
SOQ3d: In the past 12 months, when you had sex, was it with transwomen?  
SOQ3e: In the past 12 months, when you had sex, was it with non-binary individuals?  
SOQ4c: Over the past 12 months, have you had sexual activities with transwomen?  
SOQ4d: Over the past 12 months, have you had sexual activities with transmen?  
SOQ4e: Over the past 12 months, have you had sexual activities with non-binary individuals?

### **Factor 6 Perception of discrimination against men**

MSPD1a: In society, men are visibly rejected.  
MSPD2a: Society treats men unfairly.  
MSPD3a: Men suffer from occupational discrimination.  
MSPD4a: Men suffer from discrimination in the health sphere.  
MSPD5a: Men suffer from rejection in their daily social relations.  
MSPD6a: Men suffer from discrimination by some private institutions (e.g., banks, insurance companies, etc.).  
MSPD7a: Society mistrusts men.  
MSPD8a: Even when people seem to accept men, I think that, deep down, they have some misgivings.  
MSPD9a: Even though there is no express rejection, people treat men differently.

**Factor 7 Extent of sexual attraction towards non-cisgender individuals**

SOQ2b: In the past 12 months, when you felt sexually attracted, was this to transmen?

SOQ2d: In the past 12 months, when you felt sexually attracted, was this to transwomen?

SOQ2e: In the past 12 months, when you felt sexually attracted, was this to non-binary individuals?

SOQ5c: If you think about your sexual behavior, how much do you feel attracted to transwomen?

SOQ5d: If you think about your sexual behavior, how much do you feel attracted to transmen?

SOQ5e: If you think about your sexual behavior, how much do you feel attracted to non-binary individuals?

**Factor 8 Extent of romantic and sexual attraction to, and activities with, men**

SOQ1a: In the past 12 months, has/have your romantic relationship(s) been with men?

SOQ2a: In the past 12 months, when you felt sexually attracted, was this to men?

SOQ3a: In the past 12 months, when you had sex, was it with men?

SOQ4b: Over the past 12 months, have you had sexual activities with men?

SOQ5b: If you think about your sexual behavior, how much do you feel attracted to men?

**Factor 9 Extent of romantic and sexual attraction to, and activities with, women**

SOQ1c: In the past 12 months, has/have your romantic relationship(s) been with women?

SOQ2c: In the past 12 months, when you felt sexually attracted, was this to women?

SOQ3c: In the past 12 months, when you had sex, was it with women?

SOQ4a: Over the past 12 months, have you had sexual activities with women?

SOQ5a: If you think about your sexual behavior, how much do you feel attracted to women?

**Factor 10 Perception of discrimination against women**

MSPD1b: In society, women are visibly rejected.

MSPD2b: Society treats women unfairly.

MSPD3b: Women suffer from occupational discrimination.

MSPD4b: Women suffer from discrimination in the health sphere.

MSPD5b: Women suffer from rejection in their daily social relations.

MSPD6b: Women suffer from discrimination by some private institutions (e.g., banks, insurance companies, etc.).

MSPD7b: Society mistrusts women.

MSPD8b: Even when people seem to accept women, I think that, deep down, they have some misgivings.

MSPD9b: Even though there is no express rejection, people treat women differently.

**Factor 11 Perception of non-acceptance of non-cisgender individuals**

MSPD8c: Even when people seem to accept transwomen, I think that, deep down, they have some misgivings.

MSPD8d: Even when people seem to accept transmen, I think that, deep down, they have some misgivings.

MSPD8e: Even when people seem to accept non-binary individuals, I think that, deep down, they have some misgivings.

**Factor 12 Perception of discriminatory treatment of non-cisgender individuals**

MSPD9c: Even though there is no express rejection, people treat transwomen differently.

MSPD9d: Even though there is no express rejection, people treat transmen differently.

MSPD9e: Even though there is no express rejection, people treat non-binary individuals differently.

**Factor 13 Perception of discrimination against non-cisgender individuals by institutions**

MSPD6c: Transwomen suffer from discrimination by some private institutions (e.g., banks, insurance companies, etc.).

MSPD6d: Transmen suffer from discrimination by some private institutions (e.g., banks, insurance companies, etc.).

MSPD6e: Non-binary individuals suffer from discrimination by some private institutions (e.g., banks, insurance companies, etc.).

Table SF94 below shows that MIQ1 and MIQ11 load on Factor 3, while MIQ4, MIQ5 and MIQ13 load on Factor 4. MIQ6, MIQ7, MIQ9, MIQ10 and MIQ12 do not have high loadings. TCS1, TCS2, TCS3, TCS4, TCS5 and TCS6 load on Factor 3. While TCS8 loads on Factor 4, TCS7 does not have high loadings. OSRI1-19 do not have sufficient loadings, with the exception of OSRI20, which loads on Factor 3. The SOQ items have: SOQ1a-3a, SOQ4b and SOQ5b load on Factor 8. SOQ1b, SOQ1d-e, SOQ3b, SOQ3d-e and SOQ4c-4e load on Factor 5. SOQ1c-3c and SOQ4a-5a load on Factor 9. SOQ2b, SOQ2d, SOQ2e, SOQ5c-5e load on Factor 7.

For the MSPD items, MSPD1a-9a load on Factor 6, while MSPD1b-9b load on Factor 10. The items MSPD1c-e, MSPD2-e, MSPD3c-e, MSPD4c-e, MSPD5c-e, MSPD7c-e load on Factor 1. MSPD6c, MSPD6d-e load on Factor 13. MSPD8c-e load on Factor 11, while MSPD9c-e load on Factor 12. MSPD10a-l all load on Factor 2.

| Items  | F1     | F2     | F3     | F4     | F5     | F6     | F7     | F8     | F9     | F10    | F11    | F12    | F13    |
|--------|--------|--------|--------|--------|--------|--------|--------|--------|--------|--------|--------|--------|--------|
| MIQ1   | -0.057 | -0.054 | 0.582  | -0.002 | -0.019 | -0.084 | 0.168  | -0.006 | 0.012  | -0.003 | 0.004  | 0.091  | 0.018  |
| MIQ3   | -0.016 | 0.035  | 0.099  | -0.689 | 0.041  | 0.055  | 0.128  | -0.024 | -0.043 | -0.036 | 0.024  | -0.043 | 0.001  |
| MIQ4   | 0.007  | 0.002  | 0.069  | 0.685  | -0.026 | -0.069 | -0.038 | 0.025  | 0.031  | 0.112  | 0.008  | 0.034  | 0.016  |
| MIQ5   | 0.017  | 0.012  | 0.009  | 0.850  | 0.040  | 0.012  | 0.073  | -0.076 | -0.004 | -0.034 | -0.010 | 0.004  | -0.005 |
| MIQ6   | 0.003  | 0.075  | -0.396 | -0.025 | -0.020 | 0.016  | 0.225  | -0.078 | -0.040 | 0.051  | 0.002  | -0.037 | -0.026 |
| MIQ7   | 0.008  | 0.068  | -0.413 | -0.020 | 0.012  | -0.051 | 0.274  | -0.126 | -0.093 | 0.086  | 0.020  | -0.012 | 0.002  |
| MIQ9   | 0.012  | 0.097  | -0.513 | 0.099  | 0.038  | -0.016 | 0.186  | 0.048  | -0.042 | 0.021  | 0.041  | 0.054  | 0.005  |
| MIQ10  | -0.004 | 0.161  | -0.441 | 0.185  | 0.070  | -0.026 | 0.193  | 0.062  | -0.033 | -0.004 | 0.016  | 0.066  | 0.005  |
| TCS1   | 0.012  | 0.026  | 0.775  | 0.111  | -0.025 | 0.019  | -0.084 | 0.016  | -0.063 | -0.029 | 0.015  | -0.034 | -0.040 |
| TCS2   | -0.015 | 0.011  | 0.869  | 0.042  | -0.004 | -0.012 | -0.012 | -0.019 | -0.010 | -0.012 | -0.013 | -0.057 | -0.019 |
| TCS3   | 0.014  | -0.058 | 0.811  | -0.073 | -0.017 | 0.028  | -0.054 | 0.000  | 0.036  | 0.002  | -0.010 | -0.040 | -0.007 |
| TCS4   | -0.027 | -0.052 | 0.778  | -0.095 | 0.027  | -0.008 | 0.135  | -0.022 | 0.071  | 0.021  | 0.021  | 0.045  | 0.013  |
| TCS5   | -0.002 | 0.029  | 0.697  | 0.019  | -0.002 | -0.086 | 0.077  | 0.051  | 0.069  | 0.019  | -0.020 | 0.162  | 0.025  |
| OSRI1  | -0.008 | 0.090  | -0.021 | 0.147  | -0.010 | 0.151  | 0.111  | 0.020  | 0.035  | -0.029 | 0.026  | 0.021  | -0.031 |
| OSRI2  | 0.004  | 0.133  | 0.134  | -0.057 | -0.003 | 0.003  | 0.222  | 0.049  | -0.079 | 0.031  | -0.040 | 0.030  | 0.060  |
| OSRI3  | 0.108  | 0.030  | -0.174 | -0.004 | 0.027  | -0.012 | 0.059  | 0.102  | 0.056  | 0.129  | 0.037  | 0.092  | -0.050 |
| OSRI4  | 0.021  | 0.098  | -0.013 | -0.079 | -0.041 | 0.030  | 0.053  | 0.050  | 0.052  | 0.047  | 0.036  | 0.000  | 0.005  |
| OSRI5  | -0.149 | -0.052 | 0.040  | 0.155  | -0.034 | 0.079  | -0.094 | 0.014  | 0.095  | -0.133 | -0.002 | -0.023 | 0.035  |
| OSRI6  | -0.073 | 0.070  | -0.002 | 0.144  | -0.100 | 0.132  | 0.151  | -0.022 | 0.120  | 0.037  | 0.077  | 0.010  | 0.001  |
| OSRI7  | 0.040  | 0.154  | 0.121  | -0.169 | -0.094 | -0.050 | 0.143  | 0.092  | -0.042 | 0.028  | -0.010 | -0.048 | -0.008 |
| OSRI8  | -0.150 | 0.115  | 0.009  | 0.144  | -0.139 | 0.058  | -0.002 | -0.018 | 0.143  | -0.014 | 0.075  | -0.023 | -0.058 |
| OSRI9  | 0.054  | 0.117  | -0.129 | -0.127 | -0.051 | 0.051  | 0.137  | 0.055  | 0.054  | 0.057  | 0.035  | 0.036  | -0.059 |
| OSRI10 | -0.014 | 0.027  | -0.108 | 0.100  | -0.028 | 0.158  | 0.014  | 0.092  | 0.071  | 0.036  | -0.002 | 0.001  | -0.060 |
| OSRI11 | 0.044  | 0.116  | -0.033 | -0.116 | -0.001 | 0.101  | 0.183  | 0.096  | 0.062  | 0.046  | 0.046  | -0.028 | -0.047 |
| OSRI12 | 0.065  | 0.097  | 0.048  | -0.137 | -0.082 | -0.037 | 0.140  | 0.101  | -0.041 | 0.063  | 0.072  | -0.123 | 0.068  |
| OSRI13 | 0.018  | 0.065  | 0.044  | 0.265  | -0.128 | 0.120  | 0.129  | -0.021 | 0.126  | -0.055 | -0.023 | -0.024 | 0.060  |
| OSRI14 | -0.015 | 0.122  | 0.174  | -0.118 | -0.114 | 0.053  | 0.123  | 0.081  | 0.025  | 0.014  | 0.022  | -0.061 | 0.053  |
| OSRI15 | 0.019  | 0.099  | -0.005 | 0.168  | -0.108 | 0.202  | 0.117  | -0.026 | 0.125  | -0.038 | -0.029 | -0.016 | -0.007 |
| OSRI16 | 0.064  | 0.140  | 0.178  | -0.243 | -0.096 | 0.041  | 0.194  | 0.077  | -0.028 | -0.009 | 0.042  | -0.114 | 0.006  |
| OSRI17 | -0.024 | 0.048  | 0.021  | 0.121  | -0.090 | 0.128  | 0.019  | 0.008  | 0.147  | 0.010  | -0.011 | 0.001  | -0.030 |

|        |        |        |        |        |        |        |        |        |        |        |        |        |        |
|--------|--------|--------|--------|--------|--------|--------|--------|--------|--------|--------|--------|--------|--------|
| OSRI18 | 0.077  | 0.110  | 0.047  | -0.144 | 0.022  | 0.007  | 0.260  | 0.002  | -0.058 | 0.067  | 0.025  | -0.067 | 0.044  |
| SOQ1a  | 0.001  | -0.005 | 0.016  | -0.088 | 0.000  | -0.023 | 0.007  | 0.811  | -0.117 | -0.012 | 0.005  | -0.001 | 0.032  |
| SOQ1b  | -0.012 | 0.022  | -0.024 | 0.183  | 0.462  | 0.018  | 0.109  | 0.368  | 0.119  | -0.037 | -0.013 | -0.037 | 0.065  |
| SOQ1c  | 0.008  | -0.029 | 0.015  | 0.102  | -0.007 | 0.022  | 0.033  | -0.096 | 0.773  | -0.034 | -0.021 | -0.022 | 0.032  |
| SOQ1d  | -0.019 | 0.011  | -0.068 | -0.007 | 0.465  | 0.035  | 0.135  | 0.224  | 0.268  | -0.093 | -0.049 | -0.010 | 0.095  |
| SOQ1e  | 0.050  | 0.009  | 0.003  | 0.035  | 0.747  | 0.004  | 0.192  | -0.101 | -0.124 | -0.043 | -0.016 | -0.005 | 0.052  |
| SOQ2a  | -0.015 | 0.049  | 0.061  | -0.202 | -0.094 | -0.020 | 0.218  | 0.616  | -0.261 | -0.006 | 0.016  | 0.015  | 0.010  |
| SOQ2b  | -0.017 | 0.095  | -0.024 | 0.173  | 0.007  | -0.018 | 0.711  | 0.268  | -0.022 | 0.044  | 0.039  | -0.007 | 0.027  |
| SOQ2c  | 0.032  | 0.010  | -0.004 | 0.157  | -0.134 | 0.072  | 0.307  | -0.285 | 0.566  | 0.005  | 0.012  | 0.032  | -0.046 |
| SOQ2d  | 0.040  | 0.016  | -0.108 | -0.073 | 0.034  | 0.027  | 0.755  | -0.003 | 0.167  | 0.014  | -0.008 | 0.024  | 0.049  |
| SOQ2e  | 0.062  | 0.035  | -0.078 | -0.038 | 0.183  | -0.029 | 0.724  | -0.135 | -0.050 | 0.073  | 0.014  | 0.050  | -0.003 |
| SOQ3a  | 0.043  | -0.020 | -0.024 | -0.124 | 0.154  | -0.022 | -0.070 | 0.785  | -0.066 | 0.026  | 0.005  | 0.023  | -0.017 |
| SOQ3b  | -0.001 | 0.025  | -0.029 | 0.107  | 0.697  | -0.001 | -0.041 | 0.305  | 0.172  | 0.045  | 0.032  | -0.007 | -0.004 |
| SOQ3c  | -0.009 | -0.008 | 0.018  | 0.080  | 0.184  | 0.003  | -0.066 | -0.065 | 0.817  | 0.012  | 0.004  | 0.010  | -0.026 |
| SOQ3d  | -0.010 | 0.006  | -0.073 | -0.036 | 0.680  | 0.026  | -0.010 | 0.201  | 0.287  | -0.003 | 0.014  | 0.006  | 0.016  |
| SOQ3e  | 0.028  | 0.021  | -0.005 | -0.019 | 0.952  | 0.002  | 0.050  | -0.107 | -0.048 | 0.025  | 0.011  | 0.040  | -0.029 |
| MSPD1a | 0.065  | 0.034  | -0.044 | 0.034  | -0.035 | 0.703  | -0.000 | 0.016  | 0.047  | -0.018 | -0.022 | -0.013 | -0.076 |
| MSPD1b | 0.163  | 0.017  | -0.099 | -0.005 | -0.019 | 0.030  | 0.119  | 0.049  | 0.005  | 0.527  | 0.024  | -0.013 | -0.049 |
| MSPD1c | 0.630  | 0.012  | -0.020 | 0.033  | -0.013 | -0.047 | 0.034  | 0.044  | 0.011  | 0.130  | 0.091  | 0.165  | -0.122 |
| MSPD1d | 0.681  | -0.018 | -0.008 | -0.001 | -0.064 | 0.020  | -0.024 | 0.063  | 0.053  | 0.039  | 0.109  | 0.094  | -0.088 |
| MSPD1e | 0.722  | 0.031  | 0.001  | 0.018  | -0.031 | 0.061  | 0.052  | 0.046  | 0.028  | 0.008  | 0.076  | 0.037  | -0.066 |
| MSPD2a | 0.022  | -0.013 | -0.021 | 0.042  | 0.040  | 0.777  | -0.010 | 0.000  | -0.042 | -0.082 | 0.025  | -0.001 | -0.039 |
| MSPD2b | 0.245  | 0.039  | -0.049 | 0.004  | 0.012  | -0.061 | 0.051  | 0.017  | -0.001 | 0.649  | 0.033  | 0.008  | 0.002  |
| MSPD2c | 0.753  | 0.019  | -0.040 | 0.014  | 0.042  | -0.093 | 0.014  | 0.012  | -0.025 | 0.115  | -0.021 | 0.060  | 0.026  |
| MSPD2d | 0.825  | 0.021  | -0.043 | -0.010 | 0.015  | -0.041 | -0.035 | 0.023  | -0.001 | 0.056  | -0.015 | 0.028  | 0.020  |
| MSPD2e | 0.824  | 0.033  | -0.016 | -0.030 | 0.020  | -0.004 | 0.032  | 0.006  | 0.011  | -0.000 | -0.013 | 0.011  | 0.046  |
| MSPD3a | 0.038  | -0.024 | 0.027  | -0.021 | -0.000 | 0.803  | 0.020  | -0.032 | -0.001 | -0.022 | -0.000 | -0.073 | -0.050 |
| MSPD3b | 0.308  | 0.038  | 0.039  | -0.015 | 0.001  | -0.027 | 0.012  | 0.002  | 0.033  | 0.625  | -0.016 | 0.058  | 0.023  |
| MSPD3c | 0.703  | -0.009 | -0.002 | 0.017  | 0.020  | -0.077 | 0.037  | -0.020 | -0.019 | 0.105  | 0.054  | 0.034  | 0.100  |
| MSPD3d | 0.755  | 0.017  | -0.000 | -0.017 | 0.002  | -0.016 | 0.003  | -0.031 | 0.001  | -0.015 | 0.066  | -0.013 | 0.133  |
| MSPD3e | 0.759  | 0.033  | 0.022  | -0.028 | 0.017  | 0.017  | 0.044  | -0.022 | -0.016 | -0.054 | 0.046  | 0.004  | 0.129  |

|         |        |        |        |        |        |        |        |        |        |        |        |        |        |
|---------|--------|--------|--------|--------|--------|--------|--------|--------|--------|--------|--------|--------|--------|
| MSPD4a  | 0.084  | -0.025 | 0.023  | 0.011  | 0.040  | 0.765  | 0.007  | -0.019 | -0.026 | 0.021  | 0.003  | -0.071 | -0.054 |
| MSPD4b  | 0.195  | 0.084  | -0.046 | -0.009 | 0.011  | 0.042  | 0.100  | 0.010  | -0.037 | 0.583  | 0.015  | 0.035  | 0.078  |
| MSPD4c  | 0.593  | 0.055  | -0.041 | 0.025  | 0.037  | -0.035 | 0.020  | -0.002 | -0.049 | 0.170  | 0.021  | 0.054  | 0.146  |
| MSPD4d  | 0.624  | 0.052  | -0.061 | 0.010  | 0.013  | -0.016 | 0.002  | -0.008 | -0.033 | 0.127  | 0.016  | 0.058  | 0.150  |
| MSPD4e  | 0.694  | 0.063  | -0.017 | -0.003 | 0.059  | 0.011  | 0.060  | -0.045 | -0.071 | 0.053  | 0.013  | -0.033 | 0.145  |
| MSPD5a  | 0.085  | -0.029 | -0.042 | 0.074  | -0.030 | 0.737  | -0.030 | 0.019  | -0.008 | 0.089  | -0.034 | 0.074  | -0.034 |
| MSPD5b  | 0.192  | 0.106  | -0.008 | -0.036 | 0.038  | 0.165  | 0.037  | -0.017 | 0.011  | 0.550  | 0.027  | -0.062 | 0.016  |
| MSPD5c  | 0.660  | 0.024  | -0.018 | 0.014  | 0.006  | 0.029  | -0.017 | 0.002  | 0.026  | 0.034  | 0.055  | 0.169  | 0.058  |
| MSPD5d  | 0.678  | 0.050  | -0.006 | 0.007  | -0.001 | 0.052  | -0.051 | -0.006 | 0.033  | -0.027 | 0.071  | 0.121  | 0.103  |
| MSPD5e  | 0.724  | 0.049  | 0.030  | -0.003 | 0.009  | 0.093  | 0.013  | -0.002 | 0.026  | -0.062 | 0.048  | 0.069  | 0.120  |
| MSPD6a  | -0.187 | -0.006 | -0.026 | -0.016 | 0.012  | 0.739  | -0.014 | -0.010 | 0.020  | -0.004 | 0.036  | -0.098 | 0.178  |
| MSPD6b  | -0.138 | 0.063  | -0.035 | 0.006  | -0.008 | 0.045  | -0.009 | -0.004 | -0.009 | 0.611  | 0.030  | 0.022  | 0.447  |
| MSPD6c  | 0.132  | 0.023  | -0.024 | 0.017  | 0.002  | -0.071 | 0.018  | -0.008 | -0.020 | 0.088  | 0.047  | 0.101  | 0.739  |
| MSPD6d  | 0.156  | 0.032  | -0.017 | 0.010  | -0.016 | -0.031 | -0.002 | -0.009 | 0.001  | 0.004  | 0.055  | 0.081  | 0.781  |
| MSPD6e  | 0.216  | 0.056  | -0.002 | 0.012  | 0.006  | 0.009  | 0.040  | 0.001  | -0.006 | -0.031 | 0.053  | 0.034  | 0.712  |
| MSPD7a  | -0.025 | 0.113  | -0.014 | 0.081  | 0.032  | 0.531  | 0.024  | 0.027  | -0.015 | 0.094  | -0.038 | 0.117  | 0.011  |
| MSPD7b  | 0.029  | 0.014  | -0.053 | -0.047 | 0.002  | 0.097  | 0.039  | -0.036 | 0.003  | 0.503  | 0.162  | -0.055 | 0.051  |
| MSPD7c  | 0.341  | 0.013  | -0.071 | 0.035  | -0.027 | -0.048 | 0.030  | 0.054  | 0.027  | 0.095  | 0.158  | 0.277  | 0.130  |
| MSPD7d  | 0.387  | -0.005 | -0.037 | 0.008  | -0.077 | 0.014  | -0.012 | 0.077  | 0.058  | 0.034  | 0.176  | 0.212  | 0.199  |
| MSPD7e  | 0.448  | 0.014  | -0.025 | 0.010  | -0.019 | 0.034  | 0.015  | 0.052  | 0.025  | -0.003 | 0.187  | 0.134  | 0.153  |
| MSPD8a  | -0.100 | 0.119  | -0.036 | 0.018  | -0.033 | 0.531  | -0.030 | 0.025  | 0.035  | 0.135  | 0.077  | 0.066  | 0.024  |
| MSPD8b  | -0.120 | 0.117  | -0.008 | -0.028 | -0.032 | 0.126  | 0.021  | -0.002 | 0.017  | 0.458  | 0.452  | -0.035 | 0.024  |
| MSPD8c  | -0.027 | 0.003  | -0.012 | 0.004  | 0.019  | -0.038 | -0.014 | -0.013 | -0.006 | 0.016  | 0.950  | 0.041  | -0.016 |
| MSPD8d  | -0.002 | -0.005 | 0.014  | 0.007  | -0.015 | -0.001 | -0.016 | 0.014  | 0.010  | -0.021 | 0.967  | 0.025  | 0.019  |
| MSPD8e  | 0.076  | -0.002 | 0.012  | -0.029 | 0.023  | 0.020  | 0.012  | -0.019 | -0.017 | -0.037 | 0.909  | 0.001  | 0.006  |
| MSPD9a  | -0.155 | 0.107  | 0.070  | -0.031 | 0.061  | 0.558  | -0.045 | -0.009 | -0.059 | 0.082  | -0.095 | 0.295  | 0.005  |
| MSPD9b  | -0.094 | 0.117  | 0.017  | -0.027 | 0.067  | 0.062  | 0.022  | -0.032 | -0.013 | 0.506  | 0.016  | 0.394  | 0.024  |
| MSPD9c  | 0.039  | -0.002 | -0.023 | 0.025  | -0.003 | -0.048 | 0.011  | 0.014  | 0.003  | 0.032  | 0.083  | 0.865  | 0.034  |
| MSPD9d  | 0.065  | 0.016  | -0.004 | 0.000  | -0.011 | 0.002  | -0.016 | 0.011  | 0.011  | -0.037 | 0.080  | 0.853  | 0.062  |
| MSPD9e  | 0.187  | 0.046  | 0.033  | -0.019 | 0.032  | 0.017  | 0.037  | -0.011 | -0.018 | -0.066 | 0.069  | 0.707  | 0.051  |
| MSPD10a | 0.008  | 0.784  | -0.007 | 0.002  | 0.036  | 0.054  | -0.027 | -0.043 | -0.061 | 0.041  | -0.010 | 0.066  | 0.029  |

|         |        |        |        |        |        |        |        |        |        |        |        |        |        |
|---------|--------|--------|--------|--------|--------|--------|--------|--------|--------|--------|--------|--------|--------|
| MSPD10b | -0.017 | 0.815  | 0.045  | -0.068 | 0.005  | 0.049  | -0.036 | -0.013 | -0.038 | 0.038  | -0.019 | 0.096  | 0.009  |
| MSPD10c | -0.028 | 0.709  | 0.023  | -0.145 | -0.019 | 0.047  | -0.002 | 0.019  | 0.053  | -0.008 | -0.012 | 0.022  | 0.035  |
| MSPD10d | 0.001  | 0.735  | 0.052  | -0.103 | -0.033 | 0.006  | 0.049  | 0.031  | 0.020  | 0.062  | -0.043 | -0.022 | 0.030  |
| MSPD10e | -0.033 | 0.612  | -0.010 | -0.083 | -0.062 | 0.034  | 0.063  | 0.048  | 0.091  | 0.031  | -0.012 | 0.013  | 0.054  |
| MSPD10f | 0.042  | 0.840  | -0.031 | 0.052  | -0.017 | 0.068  | 0.004  | -0.002 | -0.017 | -0.050 | 0.003  | -0.034 | -0.009 |
| MSPD10g | -0.017 | 0.676  | 0.010  | -0.115 | -0.047 | 0.026  | 0.009  | 0.042  | 0.101  | 0.026  | -0.077 | -0.065 | 0.063  |
| MSPD10h | 0.002  | 0.790  | -0.078 | 0.028  | -0.010 | -0.013 | -0.006 | 0.023  | 0.020  | 0.038  | 0.034  | 0.035  | 0.001  |
| MSPD10i | 0.016  | 0.833  | -0.014 | 0.020  | 0.022  | -0.028 | 0.002  | -0.006 | -0.020 | 0.035  | 0.004  | 0.049  | 0.006  |
| MSPD10j | 0.011  | 0.809  | -0.038 | 0.120  | 0.032  | 0.004  | -0.010 | -0.046 | -0.016 | -0.008 | 0.052  | -0.038 | -0.014 |
| MIQ11   | 0.004  | -0.045 | 0.704  | -0.008 | 0.072  | -0.035 | 0.019  | -0.039 | 0.001  | 0.020  | -0.008 | -0.008 | 0.035  |
| MIQ12   | -0.007 | 0.052  | 0.000  | -0.803 | 0.007  | -0.071 | 0.060  | 0.028  | -0.027 | 0.018  | 0.026  | 0.014  | 0.008  |
| MIQ13   | -0.018 | 0.002  | 0.035  | 0.838  | 0.025  | 0.032  | 0.095  | -0.062 | -0.000 | -0.020 | -0.000 | 0.023  | 0.007  |
| TCS6    | -0.004 | 0.017  | 0.800  | 0.103  | 0.004  | 0.009  | -0.117 | 0.008  | -0.079 | 0.003  | 0.019  | -0.021 | -0.031 |
| TCS7    | 0.009  | 0.019  | 0.056  | -0.795 | -0.052 | -0.001 | -0.009 | 0.124  | -0.018 | 0.032  | -0.021 | 0.003  | -0.035 |
| TCS8    | -0.017 | -0.031 | 0.070  | 0.803  | -0.068 | 0.106  | 0.006  | 0.012  | 0.090  | -0.011 | 0.021  | -0.043 | -0.011 |
| OSRI19  | 0.045  | 0.063  | 0.150  | 0.036  | -0.118 | 0.078  | 0.068  | 0.040  | 0.113  | -0.036 | 0.003  | -0.099 | 0.012  |
| OSRI20  | -0.021 | -0.049 | 0.449  | -0.020 | -0.140 | 0.107  | -0.213 | 0.141  | 0.134  | -0.072 | -0.014 | 0.008  | -0.041 |
| SOQ4a   | -0.011 | -0.005 | 0.025  | 0.045  | 0.166  | -0.010 | -0.051 | -0.064 | 0.836  | 0.011  | 0.007  | -0.006 | -0.006 |
| SOQ4b   | 0.042  | -0.019 | -0.027 | -0.118 | 0.130  | -0.001 | -0.046 | 0.789  | -0.045 | 0.017  | 0.010  | -0.001 | -0.011 |
| SOQ4c   | -0.012 | 0.012  | -0.066 | -0.063 | 0.666  | 0.025  | 0.017  | 0.212  | 0.315  | -0.017 | 0.016  | -0.009 | 0.031  |
| SOQ4d   | 0.008  | 0.034  | -0.030 | 0.095  | 0.690  | 0.001  | -0.021 | 0.313  | 0.180  | 0.029  | 0.034  | -0.033 | 0.008  |
| SOQ4e   | 0.014  | 0.024  | -0.018 | -0.037 | 0.937  | 0.004  | 0.068  | -0.105 | -0.035 | 0.017  | 0.023  | 0.021  | -0.006 |
| SOQ5a   | 0.050  | 0.016  | 0.020  | 0.153  | -0.106 | 0.038  | 0.261  | -0.316 | 0.535  | 0.003  | 0.029  | 0.028  | -0.051 |
| SOQ5b   | -0.010 | 0.016  | 0.046  | -0.182 | -0.054 | -0.028 | 0.205  | 0.598  | -0.287 | -0.031 | 0.012  | 0.026  | 0.003  |
| SOQ5c   | 0.051  | 0.001  | -0.156 | -0.092 | 0.057  | 0.001  | 0.706  | -0.065 | 0.144  | 0.000  | -0.001 | 0.036  | 0.055  |
| SOQ5d   | 0.017  | 0.078  | -0.061 | 0.199  | 0.053  | -0.032 | 0.670  | 0.244  | -0.106 | 0.053  | 0.032  | -0.018 | 0.048  |
| SOQ5e   | 0.049  | 0.015  | -0.112 | 0.014  | 0.186  | -0.067 | 0.712  | -0.109 | -0.098 | 0.079  | -0.011 | 0.046  | 0.027  |
| MSPD10k | 0.020  | 0.909  | -0.029 | 0.015  | 0.025  | -0.060 | 0.009  | -0.016 | -0.015 | -0.032 | 0.028  | -0.022 | -0.034 |
| MSPD10l | 0.028  | 0.953  | 0.001  | 0.011  | 0.018  | -0.059 | -0.023 | -0.017 | 0.006  | -0.050 | 0.024  | -0.039 | -0.018 |

Table SF94: EFA for Total Sample (Including Supplementary Items): 13 Factors Using Oblimin Rotation.

| Factor | Eigenvalue | VAR    | CUM    |
|--------|------------|--------|--------|
| 1      | 8.8658     | 0.0733 | 0.0733 |
| 2      | 8.0019     | 0.0661 | 0.1394 |
| 3      | 7.1023     | 0.0587 | 0.1981 |
| 4      | 5.8911     | 0.0487 | 0.2468 |
| 5      | 5.2868     | 0.0437 | 0.2905 |
| 6      | 5.0078     | 0.0414 | 0.3319 |
| 7      | 4.7389     | 0.0392 | 0.3710 |
| 8      | 4.3865     | 0.0363 | 0.4073 |
| 9      | 3.1494     | 0.0260 | 0.4333 |
| 10     | 3.1179     | 0.0258 | 0.4591 |
| 11     | 2.6648     | 0.0220 | 0.4811 |
| 12     | 2.2751     | 0.0188 | 0.4999 |

Table SF95: Factors, Eigenvalues, Variance Explained, and Cumulative Variance for Total Sample (Including Supplementary Items): 12 Factors Using Oblimin Rotation.

| Factor | Items                                                                                                                                  |
|--------|----------------------------------------------------------------------------------------------------------------------------------------|
| F1     | MSPD1c, MSPD1d, MSPD1e, MSPD2c, MSPD2d, MSPD2e, MSPD3c, MSPD3d, MSPD3e, MSPD4c, MSPD4d, MSPD4e, MSPD5c, MSPD5d, MSPD5e, MSPD7d, MSPD7e |
| F2     | MSPD10a, MSPD10b, MSPD10c, MSPD10d, MSPD10e, MSPD10f, MSPD10g, MSPD10h, MSPD10i, MSPD10j, MSPD10k, MSPD10l                             |
| F3     | SOQ1b, SOQ1d, SOQ1e, SOQ3b, SOQ3d, SOQ3e, SOQ4a, SOQ4c, SOQ4d, SOQ4e                                                                   |
| F4     | MIQ1, TCS1, TCS2, TCS3, TCS4, TCS5, MIQ11, TCS6, OSRI20                                                                                |
| F5     | MIQ4, MIQ5, MIQ13, TCS8                                                                                                                |
| F6     | SOQ1a, SOQ2a, SOQ3a, SOQ4b, SOQ5b                                                                                                      |
| F7     | MSPD1a, MSPD2a, MSPD3a, MSPD4a, MSPD5a, MSPD6a, MSPD7a, MSPD8a, MSPD9a                                                                 |
| F8     | SOQ2b, SOQ2d, SOQ2e, SOQ5c, SOQ5d, SOQ5e                                                                                               |
| F9     | MSPD8c, MSPD8d, MSPD8e                                                                                                                 |
| F10    | MSPD1b, MSPD2b, MSPD3b, MSPD4b, MSPD5b, MSPD7b                                                                                         |
| F11    | MSPD9c, MSPD9d, MSPD9e                                                                                                                 |
| F12    | MSPD6c, MSPD6d, MSPD6e                                                                                                                 |

Table SF96: Factor Structure and Items (Including Supplementary Items): 12 Factors (Oblimin Rotation).

| Items  | F1      | F2      | F3      | F4      | F5      | F6      | F7      | F8      | F9      | F10     | F11     | F12     |
|--------|---------|---------|---------|---------|---------|---------|---------|---------|---------|---------|---------|---------|
| MIQ1   | -0.0595 | -0.0543 | -0.0423 | 0.5824  | -0.0012 | -0.0107 | -0.0859 | 0.1689  | 0.0032  | -0.0031 | 0.0894  | 0.0173  |
| MIQ3   | -0.0210 | 0.0375  | -0.0228 | 0.0903  | -0.6873 | 0.0110  | 0.0479  | 0.1395  | 0.0192  | -0.0324 | -0.0394 | -0.0011 |
| MIQ4   | 0.0120  | -0.0006 | 0.0149  | 0.0749  | 0.6880  | 0.0062  | -0.0618 | -0.0447 | 0.0110  | 0.1074  | 0.0304  | 0.0178  |
| MIQ5   | 0.0148  | 0.0120  | 0.0081  | -0.0007 | 0.8508  | -0.0565 | 0.0096  | 0.0812  | -0.0124 | -0.0328 | 0.0078  | -0.0046 |
| MIQ6   | 0.0021  | 0.0760  | -0.0724 | -0.3978 | -0.0275 | -0.0512 | 0.0168  | 0.2360  | 0.0025  | 0.0500  | -0.0360 | -0.0236 |
| MIQ7   | 0.0037  | 0.0702  | -0.0943 | -0.4249 | -0.0216 | -0.0516 | -0.0572 | 0.2951  | 0.0172  | 0.0893  | -0.0059 | 0.0033  |
| MIQ9   | 0.0168  | 0.0969  | 0.0419  | -0.5084 | 0.1021  | 0.0735  | -0.0100 | 0.1934  | 0.0437  | 0.0185  | 0.0527  | 0.0061  |
| MIQ10  | 0.0009  | 0.1606  | 0.0835  | -0.4375 | 0.1919  | 0.0872  | -0.0211 | 0.2014  | 0.0179  | -0.0052 | 0.0655  | 0.0048  |
| TCS1   | 0.0064  | 0.0260  | -0.0815 | 0.7558  | 0.1129  | 0.0729  | 0.0105  | -0.0877 | 0.0088  | -0.0265 | -0.0300 | -0.0424 |
| TCS2   | -0.0221 | 0.0102  | -0.0523 | 0.8526  | 0.0440  | 0.0043  | -0.0198 | -0.0136 | -0.0190 | -0.0096 | -0.0528 | -0.0214 |
| TCS3   | 0.0096  | -0.0594 | -0.0273 | 0.8044  | -0.0724 | -0.0176 | 0.0236  | -0.0600 | -0.0138 | 0.0023  | -0.0395 | -0.0092 |
| TCS4   | -0.0298 | -0.0531 | 0.0168  | 0.7786  | -0.0929 | -0.0619 | -0.0100 | 0.1372  | 0.0190  | 0.0196  | 0.0450  | 0.0111  |
| TCS5   | -0.0014 | 0.0266  | 0.0314  | 0.7061  | 0.0155  | -0.0078 | -0.0827 | 0.0717  | -0.0180 | 0.0145  | 0.1565  | 0.0253  |
| OSRI1  | -0.0030 | 0.0887  | -0.0663 | -0.0106 | 0.1475  | -0.0115 | 0.1606  | 0.0973  | 0.0312  | -0.0341 | 0.0140  | -0.0288 |
| OSRI2  | 0.0038  | 0.1326  | -0.0475 | 0.1313  | -0.0526 | 0.1086  | 0.0036  | 0.2306  | -0.0410 | 0.0296  | 0.0303  | 0.0597  |
| OSRI3  | 0.1168  | 0.0277  | 0.1023  | -0.1582 | -0.0068 | 0.0389  | -0.0009 | 0.0535  | 0.0440  | 0.1218  | 0.0849  | -0.0470 |
| OSRI4  | 0.0254  | 0.0963  | 0.0103  | -0.0006 | -0.0807 | -0.0020 | 0.0384  | 0.0437  | 0.0411  | 0.0410  | -0.0060 | 0.0076  |
| OSRI5  | -0.1475 | -0.0538 | 0.0336  | 0.0492  | 0.1592  | -0.0485 | 0.0861  | -0.1057 | 0.0018  | -0.1369 | -0.0277 | 0.0358  |
| OSRI6  | -0.0674 | 0.0675  | -0.0395 | 0.0146  | 0.1494  | -0.1052 | 0.1467  | 0.1368  | 0.0842  | 0.0275  | 0.0009  | 0.0043  |
| OSRI7  | 0.0434  | 0.1519  | -0.0886 | 0.1296  | -0.1654 | 0.1116  | -0.0424 | 0.1361  | -0.0069 | 0.0233  | -0.0536 | -0.0072 |
| OSRI8  | -0.1429 | 0.1121  | -0.0561 | 0.0282  | 0.1517  | -0.1141 | 0.0763  | -0.0222 | 0.0842  | -0.0257 | -0.0343 | -0.0531 |
| OSRI9  | 0.0606  | 0.1149  | 0.0013  | -0.1118 | -0.1302 | -0.0040 | 0.0630  | 0.1288  | 0.0425  | 0.0489  | 0.0283  | -0.0554 |
| OSRI10 | -0.0055 | 0.0251  | 0.0576  | -0.0919 | 0.0981  | 0.0220  | 0.1707  | -0.0012 | 0.0052  | 0.0283  | -0.0068 | -0.0579 |
| OSRI11 | 0.0516  | 0.1136  | 0.0615  | -0.0177 | -0.1161 | 0.0340  | 0.1130  | 0.1759  | 0.0524  | 0.0379  | -0.0356 | -0.0456 |
| OSRI12 | 0.0692  | 0.0958  | -0.0731 | 0.0551  | -0.1338 | 0.1180  | -0.0282 | 0.1344  | 0.0755  | 0.0566  | -0.1289 | 0.0700  |
| OSRI13 | 0.0243  | 0.0613  | -0.0593 | 0.0620  | 0.2682  | -0.1093 | 0.1350  | 0.1111  | -0.0156 | -0.0649 | -0.0347 | 0.0635  |
| OSRI14 | -0.0096 | 0.1198  | -0.0751 | 0.1877  | -0.1131 | 0.0548  | 0.0649  | 0.1107  | 0.0281  | 0.0053  | -0.0699 | 0.0557  |
| OSRI15 | 0.0253  | 0.0966  | -0.0472 | 0.0116  | 0.1722  | -0.1129 | 0.2174  | 0.1018  | -0.0224 | -0.0483 | -0.0257 | -0.0036 |
| OSRI16 | 0.0664  | 0.1387  | -0.0950 | 0.1853  | -0.2387 | 0.0906  | 0.0482  | 0.1881  | 0.0447  | -0.0144 | -0.1192 | 0.0069  |
| OSRI17 | -0.0167 | 0.0444  | -0.0040 | 0.0393  | 0.1268  | -0.0972 | 0.1451  | 0.0020  | -0.0024 | -0.0010 | -0.0100 | -0.0256 |

|        |         |         |         |         |         |         |         |         |         |         |         |         |
|--------|---------|---------|---------|---------|---------|---------|---------|---------|---------|---------|---------|---------|
| OSRI18 | 0.0764  | 0.1105  | -0.0352 | 0.0415  | -0.1412 | 0.0449  | 0.0055  | 0.2730  | 0.0230  | 0.0664  | -0.0658 | 0.0436  |
| SOQ1a  | 0.0221  | -0.0119 | 0.2854  | 0.0639  | -0.1286 | 0.7310  | 0.0026  | -0.0333 | 0.0273  | -0.0223 | -0.0216 | 0.0354  |
| SOQ1b  | -0.0043 | 0.0220  | 0.6697  | -0.0100 | 0.1656  | 0.2206  | 0.0148  | 0.1080  | -0.0117 | -0.0285 | -0.0342 | 0.0554  |
| SOQ1c  | 0.0268  | -0.0417 | 0.3828  | 0.0832  | 0.1361  | -0.6098 | 0.0670  | -0.0121 | 0.0019  | -0.0581 | -0.0486 | 0.0348  |
| SOQ1d  | -0.0120 | 0.0091  | 0.6961  | -0.0485 | -0.0243 | -0.0146 | 0.0360  | 0.1337  | -0.0462 | -0.0895 | -0.0091 | 0.0870  |
| SOQ1e  | 0.0334  | 0.0208  | 0.5494  | -0.0643 | 0.0298  | 0.0157  | -0.0443 | 0.2630  | -0.0436 | -0.0119 | 0.0305  | 0.0360  |
| SOQ2a  | 0.0018  | 0.0440  | 0.0135  | 0.0889  | -0.2087 | 0.7247  | -0.0003 | 0.1974  | 0.0280  | -0.0157 | 0.0010  | 0.0115  |
| SOQ2b  | -0.0047 | 0.0911  | 0.0869  | 0.0034  | 0.1760  | 0.2502  | -0.0005 | 0.7067  | 0.0487  | 0.0349  | -0.0185 | 0.0280  |
| SOQ2c  | 0.0415  | 0.0029  | 0.0647  | 0.0462  | 0.1657  | -0.6715 | 0.1045  | 0.2800  | 0.0292  | -0.0166 | 0.0106  | -0.0375 |
| SOQ2d  | 0.0454  | 0.0131  | 0.1091  | -0.0795 | -0.0808 | -0.1486 | 0.0418  | 0.7553  | 0.0006  | 0.0045  | 0.0144  | 0.0518  |
| SOQ2e  | 0.0569  | 0.0382  | 0.0437  | -0.0947 | -0.0356 | -0.0824 | -0.0388 | 0.7600  | 0.0074  | 0.0775  | 0.0583  | -0.0042 |
| SOQ3a  | 0.0612  | -0.0257 | 0.4447  | 0.0207  | -0.1663 | 0.6715  | 0.0003  | -0.0949 | 0.0251  | 0.0120  | 0.0057  | -0.0117 |
| SOQ3b  | 0.0037  | 0.0271  | 0.8881  | -0.0267 | 0.0922  | 0.1389  | -0.0107 | -0.0147 | 0.0283  | 0.0497  | 0.0031  | -0.0116 |
| SOQ3c  | 0.0098  | -0.0208 | 0.5939  | 0.0833  | 0.1182  | -0.5990 | 0.0474  | -0.0934 | 0.0242  | -0.0167 | -0.0121 | -0.0220 |
| SOQ3d  | -0.0065 | 0.0063  | 0.8938  | -0.0648 | -0.0508 | -0.0363 | 0.0211  | 0.0143  | 0.0111  | -0.0021 | 0.0148  | 0.0101  |
| SOQ3e  | 0.0115  | 0.0331  | 0.7756  | -0.0748 | -0.0221 | -0.0340 | -0.0465 | 0.1397  | -0.0187 | 0.0489  | 0.0778  | -0.0414 |
| MSPD1a | 0.0662  | 0.0335  | -0.0093 | -0.0410 | 0.0339  | -0.0197 | 0.7086  | -0.0072 | -0.0209 | -0.0206 | -0.0158 | -0.0757 |
| MSPD1b | 0.1721  | 0.0166  | 0.0115  | -0.0872 | -0.0082 | 0.0246  | 0.0384  | 0.1150  | 0.0290  | 0.5209  | -0.0171 | -0.0470 |
| MSPD1c | 0.6408  | 0.0102  | 0.0012  | -0.0140 | 0.0311  | 0.0185  | -0.0416 | 0.0297  | 0.0924  | 0.1240  | 0.1584  | -0.1206 |
| MSPD1d | 0.6920  | -0.0207 | -0.0130 | 0.0050  | -0.0027 | 0.0047  | 0.0297  | -0.0369 | 0.1129  | 0.0299  | 0.0839  | -0.0863 |
| MSPD1e | 0.7311  | 0.0291  | -0.0088 | 0.0079  | 0.0190  | 0.0155  | 0.0674  | 0.0460  | 0.0761  | 0.0018  | 0.0310  | -0.0667 |
| MSPD2a | 0.0176  | -0.0103 | 0.0031  | -0.0334 | 0.0383  | 0.0326  | 0.7698  | -0.0050 | 0.0198  | -0.0758 | 0.0039  | -0.0414 |
| MSPD2b | 0.2535  | 0.0391  | 0.0233  | -0.0420 | 0.0008  | -0.0006 | -0.0562 | 0.0522  | 0.0363  | 0.6435  | 0.0064  | 0.0032  |
| MSPD2c | 0.7596  | 0.0193  | 0.0211  | -0.0437 | 0.0131  | 0.0223  | -0.0950 | 0.0189  | -0.0247 | 0.1138  | 0.0593  | 0.0239  |
| MSPD2d | 0.8329  | 0.0202  | 0.0143  | -0.0426 | -0.0112 | 0.0133  | -0.0416 | -0.0347 | -0.0179 | 0.0534  | 0.0247  | 0.0178  |
| MSPD2e | 0.8305  | 0.0321  | 0.0155  | -0.0160 | -0.0299 | -0.0066 | -0.0055 | 0.0331  | -0.0165 | -0.0015 | 0.0089  | 0.0424  |
| MSPD3a | 0.0340  | -0.0225 | -0.0320 | 0.0176  | -0.0162 | -0.0154 | 0.7990  | 0.0230  | -0.0051 | -0.0194 | -0.0699 | -0.0515 |
| MSPD3b | 0.3169  | 0.0383  | 0.0218  | 0.0474  | -0.0170 | -0.0359 | -0.0208 | 0.0096  | -0.0127 | 0.6197  | 0.0543  | 0.0246  |
| MSPD3c | 0.7074  | -0.0088 | -0.0112 | -0.0071 | 0.0179  | -0.0069 | -0.0806 | 0.0422  | 0.0507  | 0.1047  | 0.0331  | 0.0982  |
| MSPD3d | 0.7579  | 0.0167  | -0.0254 | -0.0053 | -0.0145 | -0.0287 | -0.0185 | 0.0062  | 0.0613  | -0.0162 | -0.0138 | 0.1313  |
| MSPD3e | 0.7617  | 0.0331  | -0.0169 | 0.0152  | -0.0263 | -0.0072 | 0.0119  | 0.0485  | 0.0398  | -0.0524 | 0.0046  | 0.1256  |

|         |         |         |         |         |         |         |         |         |         |         |         |         |
|---------|---------|---------|---------|---------|---------|---------|---------|---------|---------|---------|---------|---------|
| MSPD4a  | 0.0793  | -0.0222 | 0.0018  | 0.0107  | 0.0085  | 0.0054  | 0.7576  | 0.0127  | -0.0024 | 0.0262  | -0.0658 | -0.0566 |
| MSPD4b  | 0.1988  | 0.0842  | -0.0058 | -0.0445 | -0.0108 | 0.0232  | 0.0435  | 0.1053  | 0.0165  | 0.5813  | 0.0356  | 0.0792  |
| MSPD4c  | 0.5951  | 0.0552  | -0.0011 | -0.0471 | 0.0250  | 0.0309  | -0.0392 | 0.0290  | 0.0170  | 0.1702  | 0.0554  | 0.1443  |
| MSPD4d  | 0.6271  | 0.0522  | -0.0158 | -0.0650 | 0.0109  | 0.0146  | -0.0182 | 0.0074  | 0.0131  | 0.1265  | 0.0579  | 0.1496  |
| MSPD4e  | 0.6921  | 0.0640  | -0.0163 | -0.0321 | -0.0021 | 0.0127  | -0.0003 | 0.0744  | 0.0041  | 0.0578  | -0.0269 | 0.1407  |
| MSPD5a  | 0.0859  | -0.0290 | -0.0297 | -0.0424 | 0.0703  | 0.0200  | 0.7408  | -0.0317 | -0.0342 | 0.0877  | 0.0730  | -0.0335 |
| MSPD5b  | 0.1961  | 0.1074  | 0.0387  | -0.0066 | -0.0401 | -0.0347 | 0.1657  | 0.0403  | 0.0268  | 0.5480  | -0.0609 | 0.0162  |
| MSPD5c  | 0.6673  | 0.0233  | 0.0126  | -0.0149 | 0.0144  | -0.0209 | 0.0312  | -0.0177 | 0.0540  | 0.0306  | 0.1653  | 0.0574  |
| MSPD5d  | 0.6836  | 0.0489  | 0.0082  | -0.0036 | 0.0052  | -0.0352 | 0.0526  | -0.0527 | 0.0698  | -0.0301 | 0.1168  | 0.1024  |
| MSPD5e  | 0.7285  | 0.0481  | 0.0106  | 0.0305  | -0.0038 | -0.0242 | 0.0925  | 0.0127  | 0.0451  | -0.0634 | 0.0661  | 0.1175  |
| MSPD6a  | -0.1917 | -0.0042 | 0.0142  | -0.0312 | -0.0156 | -0.0146 | 0.7371  | -0.0141 | 0.0334  | -0.0021 | -0.0955 | 0.1770  |
| MSPD6b  | -0.1356 | 0.0642  | 0.0072  | -0.0308 | 0.0048  | -0.0017 | 0.0476  | -0.0096 | 0.0323  | 0.6074  | 0.0221  | 0.4501  |
| MSPD6c  | 0.1310  | 0.0234  | -0.0025 | -0.0254 | 0.0202  | 0.0153  | -0.0725 | 0.0210  | 0.0456  | 0.0856  | 0.0997  | 0.7414  |
| MSPD6d  | 0.1538  | 0.0316  | -0.0075 | -0.0167 | 0.0131  | -0.0012 | -0.0321 | -0.0027 | 0.0538  | 0.0014  | 0.0785  | 0.7842  |
| MSPD6e  | 0.2144  | 0.0558  | 0.0090  | -0.0024 | 0.0142  | 0.0130  | 0.0061  | 0.0413  | 0.0498  | -0.0318 | 0.0329  | 0.7126  |
| MSPD7a  | -0.0250 | 0.1141  | 0.0273  | -0.0164 | 0.0796  | 0.0356  | 0.5317  | 0.0263  | -0.0390 | 0.0937  | 0.1177  | 0.0107  |
| MSPD7b  | 0.0321  | 0.0152  | -0.0067 | -0.0517 | -0.0464 | -0.0389 | 0.0986  | 0.0415  | 0.1623  | 0.5009  | -0.0544 | 0.0517  |
| MSPD7c  | 0.3501  | 0.0119  | 0.0110  | -0.0596 | 0.0361  | 0.0224  | -0.0398 | 0.0231  | 0.1622  | 0.0886  | 0.2695  | 0.1325  |
| MSPD7d  | 0.3975  | -0.0077 | -0.0085 | -0.0201 | 0.0092  | 0.0206  | 0.0254  | -0.0276 | 0.1825  | 0.0251  | 0.2010  | 0.2023  |
| MSPD7e  | 0.4550  | 0.0132  | 0.0125  | -0.0181 | 0.0120  | 0.0254  | 0.0389  | 0.0085  | 0.1879  | -0.0064 | 0.1289  | 0.1530  |
| MSPD8a  | -0.0969 | 0.1191  | -0.0055 | -0.0306 | 0.0191  | -0.0027 | 0.5387  | -0.0352 | 0.0798  | 0.1306  | 0.0632  | 0.0260  |
| MSPD8b  | -0.1167 | 0.1178  | -0.0196 | -0.0040 | -0.0299 | -0.0237 | 0.1300  | 0.0177  | 0.4545  | 0.4546  | -0.0356 | 0.0262  |
| MSPD8c  | -0.0265 | 0.0045  | 0.0010  | -0.0194 | 0.0040  | -0.0070 | -0.0429 | -0.0109 | 0.9477  | 0.0176  | 0.0441  | -0.0150 |
| MSPD8d  | -0.0009 | -0.0047 | -0.0105 | 0.0116  | 0.0065  | 0.0042  | -0.0020 | -0.0180 | 0.9669  | -0.0214 | 0.0256  | 0.0204  |
| MSPD8e  | 0.0747  | -0.0007 | -0.0068 | 0.0020  | -0.0287 | -0.0022 | 0.0131  | 0.0158  | 0.9038  | -0.0327 | 0.0057  | 0.0050  |
| MSPD9a  | -0.1579 | 0.1103  | 0.0122  | 0.0587  | -0.0279 | 0.0458  | 0.5520  | -0.0368 | -0.0992 | 0.0864  | 0.2996  | 0.0032  |
| MSPD9b  | -0.0911 | 0.1196  | 0.0455  | 0.0172  | -0.0274 | -0.0234 | 0.0612  | 0.0292  | 0.0174  | 0.5070  | 0.3956  | 0.0245  |
| MSPD9c  | 0.0476  | -0.0017 | 0.0049  | -0.0127 | 0.0265  | 0.0074  | -0.0425 | 0.0086  | 0.0894  | 0.0296  | 0.8572  | 0.0364  |
| MSPD9d  | 0.0720  | 0.0162  | -0.0002 | 0.0068  | 0.0004  | -0.0025 | 0.0068  | -0.0201 | 0.0855  | -0.0389 | 0.8453  | 0.0650  |
| MSPD9e  | 0.1913  | 0.0473  | 0.0099  | 0.0348  | -0.0197 | -0.0005 | 0.0151  | 0.0392  | 0.0700  | -0.0634 | 0.7043  | 0.0512  |
| MSPD10a | 0.0038  | 0.7875  | -0.0158 | -0.0163 | 0.0014  | 0.0084  | 0.0481  | -0.0194 | -0.0141 | 0.0430  | 0.0699  | 0.0274  |

|         |         |         |         |         |         |         |         |         |         |         |         |         |
|---------|---------|---------|---------|---------|---------|---------|---------|---------|---------|---------|---------|---------|
| MSPD10b | -0.0193 | 0.8183  | -0.0191 | 0.0427  | -0.0693 | 0.0148  | 0.0457  | -0.0347 | -0.0211 | 0.0393  | 0.0971  | 0.0086  |
| MSPD10c | -0.0269 | 0.7106  | 0.0252  | 0.0335  | -0.1496 | -0.0331 | 0.0511  | -0.0123 | -0.0089 | -0.0102 | 0.0174  | 0.0353  |
| MSPD10d | 0.0023  | 0.7364  | -0.0044 | 0.0609  | -0.1068 | 0.0032  | 0.0101  | 0.0401  | -0.0399 | 0.0593  | -0.0260 | 0.0308  |
| MSPD10e | -0.0283 | 0.6109  | 0.0205  | 0.0108  | -0.0865 | -0.0361 | 0.0456  | 0.0468  | -0.0052 | 0.0239  | 0.0039  | 0.0562  |
| MSPD10f | 0.0404  | 0.8426  | -0.0221 | -0.0306 | 0.0512  | 0.0085  | 0.0683  | 0.0025  | 0.0021  | -0.0514 | -0.0344 | -0.0095 |
| MSPD10g | -0.0140 | 0.6754  | 0.0396  | 0.0296  | -0.1193 | -0.0481 | 0.0366  | -0.0072 | -0.0710 | 0.0198  | -0.0726 | 0.0649  |
| MSPD10h | 0.0036  | 0.7907  | 0.0182  | -0.0702 | 0.0285  | 0.0031  | -0.0082 | -0.0093 | 0.0360  | 0.0334  | 0.0321  | 0.0022  |
| MSPD10i | 0.0155  | 0.8353  | 0.0089  | -0.0155 | 0.0235  | 0.0136  | -0.0288 | 0.0042  | 0.0028  | 0.0345  | 0.0493  | 0.0043  |
| MSPD10j | 0.0077  | 0.8121  | 0.0066  | -0.0437 | 0.1212  | -0.0270 | 0.0002  | -0.0059 | 0.0482  | -0.0076 | -0.0353 | -0.0150 |
| MIQ11   | -0.0032 | -0.0436 | 0.0190  | 0.6905  | -0.0064 | -0.0236 | -0.0457 | 0.0277  | -0.0150 | 0.0238  | -0.0021 | 0.0318  |
| MIQ12   | -0.0083 | 0.0532  | -0.0121 | 0.0032  | -0.8059 | 0.0354  | -0.0729 | 0.0637  | 0.0264  | 0.0184  | 0.0135  | 0.0075  |
| MIQ13   | -0.0195 | 0.0019  | 0.0012  | 0.0285  | 0.8380  | -0.0483 | 0.0307  | 0.1021  | -0.0015 | -0.0198 | 0.0259  | 0.0078  |
| TCS6    | -0.0109 | 0.0175  | -0.0621 | 0.7781  | 0.1002  | 0.0725  | -0.0031 | -0.1181 | 0.0113  | 0.0077  | -0.0153 | -0.0344 |
| TCS7    | 0.0134  | 0.0181  | -0.0197 | 0.0677  | -0.7956 | 0.1145  | 0.0046  | -0.0176 | -0.0172 | 0.0289  | -0.0025 | -0.0346 |
| TCS8    | -0.0118 | -0.0346 | 0.0006  | 0.0804  | 0.8076  | -0.0461 | 0.1178  | -0.0065 | 0.0256  | -0.0190 | -0.0488 | -0.0089 |
| OSRI19  | 0.0522  | 0.0597  | -0.0423 | 0.1678  | 0.0433  | -0.0407 | 0.0944  | 0.0495  | 0.0101  | -0.0471 | -0.1099 | 0.0143  |
| OSRI20  | -0.0135 | -0.0545 | -0.0041 | 0.4713  | -0.0189 | 0.0283  | 0.1238  | -0.2468 | -0.0051 | -0.0832 | -0.0055 | -0.0393 |
| SOQ4a   | 0.0095  | -0.0176 | 0.5863  | 0.0922  | 0.0862  | -0.6109 | 0.0363  | -0.0813 | 0.0273  | -0.0174 | -0.0294 | -0.0033 |
| SOQ4b   | 0.0624  | -0.0245 | 0.4338  | 0.0206  | -0.1583 | 0.6607  | 0.0237  | -0.0754 | 0.0307  | 0.0030  | -0.0188 | -0.0063 |
| SOQ4c   | -0.0057 | 0.0122  | 0.9004  | -0.0530 | -0.0759 | -0.0465 | 0.0223  | 0.0352  | 0.0136  | -0.0170 | -0.0020 | 0.0232  |
| SOQ4d   | 0.0143  | 0.0364  | 0.8895  | -0.0257 | 0.0829  | 0.1423  | -0.0089 | 0.0015  | 0.0294  | 0.0352  | -0.0228 | -0.0019 |
| SOQ4e   | -0.0006 | 0.0362  | 0.7722  | -0.0862 | -0.037  | -0.0414 | -0.0441 | 0.1537  | -0.0067 | 0.0419  | 0.0585  | -0.0203 |
| SOQ5a   | 0.0570  | 0.0090  | 0.0590  | 0.0632  | 0.1606  | -0.6768 | 0.0655  | 0.2421  | 0.0440  | -0.0160 | 0.0099  | -0.0435 |
| SOQ5b   | 0.0045  | 0.0121  | 0.0257  | 0.0674  | -0.1868 | 0.7340  | -0.0120 | 0.1938  | 0.0217  | -0.0384 | 0.0158  | 0.0039  |
| SOQ5c   | 0.0536  | -0.0014 | 0.0904  | -0.1339 | -0.1000 | -0.1835 | 0.0113  | 0.7179  | 0.0049  | -0.0068 | 0.0304  | 0.0578  |
| SOQ5d   | 0.0244  | 0.0756  | 0.0703  | -0.0455 | 0.2045  | 0.2977  | -0.0213 | 0.6814  | 0.0366  | 0.0476  | -0.0233 | 0.0473  |
| SOQ5e   | 0.0425  | 0.0184  | 0.0362  | -0.1301 | 0.0157  | -0.0239 | -0.0782 | 0.7538  | -0.0178 | 0.0837  | 0.0561  | 0.0255  |
| MSPD10k | 0.0185  | 0.9121  | 0.0105  | -0.0307 | 0.0169  | -0.0005 | -0.0624 | 0.0117  | 0.0263  | -0.0324 | -0.0210 | -0.0352 |
| MSPD10l | 0.0262  | 0.9554  | 0.0158  | 0.0003  | 0.0146  | -0.0149 | -0.0599 | -0.0231 | 0.0224  | -0.0509 | -0.0392 | -0.0191 |

Table SF97: EFA for Total Sample (Including Supplementary Items): 12 Factors Using Oblimin Rotation.

|        | <b>F1</b> | <b>F2</b> | <b>F3</b> | <b>F4</b> | <b>F5</b> | <b>F6</b> | <b>F7</b> | <b>F8</b> |
|--------|-----------|-----------|-----------|-----------|-----------|-----------|-----------|-----------|
| MIQ1   | 0.0156    | -0.0455   | -0.0396   | 0.5941    | 0.0059    | -0.0914   | -0.0084   | 0.1695    |
| MIQ3   | -0.0773   | 0.0379    | -0.0106   | 0.0917    | -0.6640   | 0.0245    | 0.0255    | 0.1183    |
| MIQ4   | 0.1185    | 0.0049    | -0.0001   | 0.0747    | 0.6516    | -0.0110   | -0.0091   | -0.0066   |
| MIQ5   | 0.0051    | 0.0072    | 0.0054    | -0.0067   | 0.8482    | 0.0081    | -0.0695   | 0.0889    |
| MIQ6   | -0.0383   | 0.0779    | -0.0691   | -0.4024   | -0.0303   | 0.0306    | -0.0542   | 0.2485    |
| MIQ7   | 0.0286    | 0.0796    | -0.0928   | -0.4243   | -0.0307   | -0.0315   | -0.0561   | 0.3177    |
| MIQ9   | 0.0814    | 0.1045    | 0.0456    | -0.5033   | 0.1104    | -0.0041   | 0.0742    | 0.1905    |
| MIQ10  | 0.0484    | 0.1662    | 0.0867    | -0.4331   | 0.2001    | -0.0220   | 0.0849    | 0.1984    |
| TCS1   | -0.0430   | 0.0151    | -0.0839   | 0.7504    | 0.1080    | 0.0127    | 0.0699    | -0.0881   |
| TCS2   | -0.0880   | 0.0016    | -0.0545   | 0.8449    | 0.0352    | -0.0169   | 0.0014    | -0.0065   |
| TCS3   | -0.0292   | -0.0683   | -0.0292   | 0.8000    | -0.0808   | 0.0265    | -0.0181   | -0.0556   |
| TCS4   | 0.0254    | -0.0488   | 0.0201    | 0.7877    | -0.0904   | -0.0080   | -0.0578   | 0.1396    |
| TCS5   | 0.1293    | 0.0326    | 0.0300    | 0.7218    | 0.0164    | -0.0835   | -0.0066   | 0.0743    |
| OSRI1  | -0.0177   | 0.0852    | -0.0597   | -0.0105   | 0.1652    | 0.1501    | -0.0089   | 0.0821    |
| OSRI2  | 0.0349    | 0.1333    | -0.0491   | 0.1326    | -0.0584   | 0.0048    | 0.1029    | 0.2473    |
| OSRI3  | 0.2189    | 0.0287    | 0.0974    | -0.1514   | -0.0246   | 0.0402    | 0.0357    | 0.0715    |
| OSRI4  | 0.0623    | 0.0977    | 0.0111    | 0.0013    | -0.0839   | 0.0560    | 0.0014    | 0.0477    |
| OSRI5  | -0.1899   | -0.0522   | 0.0403    | 0.0499    | 0.1838    | 0.0526    | -0.0405   | -0.1338   |
| OSRI6  | -0.0110   | 0.0770    | -0.0329   | 0.0188    | 0.1581    | 0.1640    | -0.0992   | 0.1317    |
| OSRI7  | -0.0087   | 0.1452    | -0.0889   | 0.1224    | -0.1720   | -0.0359   | 0.1087    | 0.1466    |
| OSRI8  | -0.1600   | 0.1208    | -0.0492   | 0.0298    | 0.1643    | 0.0888    | -0.1056   | -0.0371   |
| OSRI9  | 0.0738    | 0.1145    | 0.0056    | -0.1098   | -0.1258   | 0.0744    | -0.0009   | 0.1268    |
| OSRI10 | -0.0445   | 0.0209    | 0.0572    | -0.0959   | 0.0948    | 0.1852    | 0.0206    | 0.0004    |
| OSRI11 | 0.0198    | 0.1090    | 0.0675    | -0.0213   | -0.1128   | 0.1255    | 0.0374    | 0.1744    |
| OSRI12 | 0.0830    | 0.0939    | -0.0732   | 0.0466    | -0.1439   | -0.0022   | 0.1211    | 0.1473    |
| OSRI13 | 0.0005    | 0.0522    | -0.0530   | 0.0569    | 0.2801    | 0.1154    | -0.1107   | 0.1001    |
| OSRI14 | -0.0144   | 0.1185    | -0.0725   | 0.1835    | -0.1112   | 0.0698    | 0.0592    | 0.1125    |
| OSRI15 | -0.0431   | 0.0848    | -0.0397   | 0.0051    | 0.1852    | 0.1991    | -0.1145   | 0.0890    |
| OSRI16 | -0.0143   | 0.1278    | -0.0874   | 0.1750    | -0.2297   | 0.0421    | 0.0950    | 0.1811    |
| OSRI17 | -0.0470   | 0.0399    | -0.0017   | 0.0361    | 0.1290    | 0.1503    | -0.0967   | -0.0017   |
| OSRI18 | 0.0790    | 0.1071    | -0.0331   | 0.0364    | -0.1499   | 0.0233    | 0.0432    | 0.2890    |
| SOQ1a  | 0.0286    | -0.0153   | 0.2762    | 0.0577    | -0.1220   | -0.0034   | 0.7429    | -0.0372   |
| SOQ1b  | -0.0272   | 0.0213    | 0.6674    | -0.0175   | 0.1667    | 0.0023    | 0.2253    | 0.1111    |
| SOQ1c  | -0.0047   | -0.0467   | 0.3972    | 0.0804    | 0.1454    | 0.0492    | -0.6029   | -0.0319   |
| SOQ1d  | -0.0447   | 0.0080    | 0.7042    | -0.0519   | -0.0078   | -0.0055   | -0.0057   | 0.1169    |
| SOQ1e  | 0.0228    | 0.0199    | 0.5525    | -0.0635   | 0.0308    | -0.0614   | 0.0140    | 0.2719    |
| SOQ2a  | -0.0020   | 0.0437    | 0.0098    | 0.0863    | -0.1941   | -0.0123   | 0.7309    | 0.1930    |
| SOQ2b  | -0.0046   | 0.0982    | 0.0962    | -0.0001   | 0.1908    | -0.0005   | 0.2507    | 0.7178    |
| SOQ2c  | 0.0204    | 0.0006    | 0.0858    | 0.0479    | 0.1865    | 0.0935    | -0.6646   | 0.2598    |
| SOQ2d  | 0.0408    | 0.0175    | 0.1305    | -0.0802   | -0.0529   | 0.0157    | -0.1435   | 0.7442    |
| SOQ2e  | 0.0805    | 0.0446    | 0.0574    | -0.0900   | -0.0261   | -0.0369   | -0.0859   | 0.7762    |
| SOQ3a  | 0.0705    | -0.0322   | 0.4338    | 0.0163    | -0.1689   | 0.0080    | 0.6824    | -0.0942   |
| SOQ3b  | 0.0269    | 0.0296    | 0.8821    | -0.0279   | 0.0759    | 0.0134    | 0.1444    | -0.0011   |
| SOQ3c  | 0.0002    | -0.0228   | 0.6052    | 0.0847    | 0.1178    | 0.0507    | -0.5912   | -0.1069   |
| SOQ3d  | 0.0044    | 0.0089    | 0.8973    | -0.0631   | -0.0523   | 0.0210    | -0.0265   | 0.0097    |
| SOQ3e  | 0.0296    | 0.0360    | 0.7753    | -0.0684   | -0.0335   | -0.0353   | -0.0339   | 0.1551    |
| MSPD1a | -0.0512   | 0.0098    | -0.0009   | -0.0453   | 0.0497    | 0.6910    | -0.0223   | -0.0288   |
| MSPD1b | 0.3469    | 0.0363    | -0.0186   | -0.0941   | -0.1068   | 0.1965    | 0.0036    | 0.2230    |

|         |         |         |         |         |         |         |         |         |
|---------|---------|---------|---------|---------|---------|---------|---------|---------|
| MSPD1c  | 0.7751  | -0.0253 | -0.0002 | -0.0114 | 0.0188  | -0.0172 | 0.0078  | 0.0302  |
| MSPD1d  | 0.7692  | -0.0674 | -0.0081 | 0.0020  | 0.0035  | 0.0228  | 0.0002  | -0.0577 |
| MSPD1e  | 0.7424  | -0.0244 | -0.0012 | -0.0048 | 0.0301  | 0.0412  | 0.0082  | 0.0183  |
| MSPD2a  | -0.0623 | -0.0267 | 0.0162  | -0.0311 | 0.0743  | 0.7290  | 0.0371  | -0.044  |
| MSPD2b  | 0.5426  | 0.0665  | -0.0172 | -0.0479 | -0.1233 | 0.1398  | -0.0241 | 0.1863  |
| MSPD2c  | 0.8413  | -0.0310 | 0.0121  | -0.0547 | -0.0225 | -0.0826 | -0.0016 | 0.0432  |
| MSPD2d  | 0.8632  | -0.0407 | 0.0095  | -0.058  | -0.0340 | -0.0528 | -0.008  | -0.0257 |
| MSPD2e  | 0.8389  | -0.0299 | 0.0169  | -0.0342 | -0.035  | -0.0421 | -0.0234 | 0.0241  |
| MSPD3a  | -0.1005 | -0.0421 | -0.0215 | 0.0115  | 0.0047  | 0.7717  | -0.0159 | -0.0010 |
| MSPD3b  | 0.6177  | 0.0573  | -0.0197 | 0.0402  | -0.1387 | 0.1574  | -0.0616 | 0.1398  |
| MSPD3c  | 0.8714  | -0.0505 | -0.0164 | -0.0157 | -0.0081 | -0.0668 | -0.0218 | 0.0555  |
| MSPD3d  | 0.8647  | -0.0366 | -0.0219 | -0.0172 | -0.0156 | -0.0468 | -0.0376 | -0.0079 |
| MSPD3e  | 0.8463  | -0.0213 | -0.0102 | 0.0009  | -0.0142 | -0.0387 | -0.0143 | 0.0196  |
| MSPD4a  | -0.0327 | -0.0448 | 0.0079  | 0.0029  | 0.01492 | 0.7502  | 0.0008  | 0.0012  |
| MSPD4b  | 0.5223  | 0.1111  | -0.0420 | -0.0451 | -0.1235 | 0.2127  | -0.0015 | 0.2273  |
| MSPD4c  | 0.8177  | 0.0242  | -0.0135 | -0.0502 | -0.0201 | -0.0019 | 0.0107  | 0.0631  |
| MSPD4d  | 0.8348  | 0.0160  | -0.0253 | -0.0687 | -0.0250 | 0.0024  | -0.0044 | 0.0305  |
| MSPD4e  | 0.7920  | 0.0159  | -0.0193 | -0.0471 | -0.0222 | -0.0109 | -0.0045 | 0.0807  |
| MSPD5a  | 0.1046  | -0.0445 | -0.0312 | -0.0389 | 0.0666  | 0.7524  | 0.0127  | -0.0310 |
| MSPD5b  | 0.3962  | 0.1254  | 0.0063  | -0.0176 | -0.1431 | 0.3242  | -0.0539 | 0.1500  |
| MSPD5c  | 0.8755  | -0.0174 | 0.0136  | -0.0105 | 0.0164  | 0.0146  | -0.0286 | -0.0352 |
| MSPD5d  | 0.8729  | 0.0040  | 0.0129  | -0.0018 | 0.0185  | 0.0161  | -0.0386 | -0.0824 |
| MSPD5e  | 0.8548  | -0.0037 | 0.0186  | 0.0228  | 0.0168  | 0.0359  | -0.0281 | -0.0263 |
| MSPD6a  | -0.1460 | 0.0075  | 0.0204  | -0.0264 | -0.0016 | 0.7262  | -0.0058 | -0.0260 |
| MSPD6b  | 0.4698  | 0.1387  | -0.0376 | -0.0159 | -0.1133 | 0.2294  | -0.0110 | 0.1285  |
| MSPD6c  | 0.7876  | 0.0586  | -0.0158 | 0.0006  | -0.0054 | -0.0530 | 0.0217  | 0.0505  |
| MSPD6d  | 0.7928  | 0.0611  | -0.0153 | 0.0086  | 0.0051  | -0.0427 | 0.0101  | 0.0096  |
| MSPD6e  | 0.7516  | 0.0745  | 0.0057  | 0.0128  | 0.0177  | -0.0239 | 0.0246  | 0.0376  |
| MSPD7a  | 0.0608  | 0.1148  | 0.0231  | -0.0053 | 0.0721  | 0.5518  | 0.0300  | 0.0378  |
| MSPD7b  | 0.3397  | 0.0550  | -0.0310 | -0.0475 | -0.1237 | 0.2588  | -0.0398 | 0.1274  |
| MSPD7c  | 0.7910  | 0.0173  | 0.0113  | -0.0290 | 0.0488  | -0.0210 | 0.0341  | 0.0044  |
| MSPD7d  | 0.8231  | -0.0095 | -0.0044 | 0.0058  | 0.0332  | 0.0216  | 0.0368  | -0.0600 |
| MSPD7e  | 0.7805  | 0.0020  | 0.0209  | -0.0033 | 0.0451  | 0.0200  | 0.0424  | -0.0366 |
| MSPD8a  | 0.0538  | 0.1342  | -0.0076 | -0.0165 | 0.0154  | 0.5824  | 0.0043  | -0.0282 |
| MSPD8b  | 0.3466  | 0.1828  | -0.0290 | 0.0181  | -0.0692 | 0.3033  | 0.0020  | 0.0639  |
| MSPD8c  | 0.5957  | 0.0689  | 0.0390  | 0.0369  | 0.0898  | 0.0329  | 0.0645  | -0.1077 |
| MSPD8d  | 0.6241  | 0.0574  | 0.0304  | 0.0657  | 0.1007  | 0.0577  | 0.0774  | -0.1237 |
| MSPD8e  | 0.6276  | 0.0514  | 0.0344  | 0.0482  | 0.0677  | 0.0574  | 0.0682  | -0.0931 |
| MSPD9a  | 0.0175  | 0.1283  | 0.0053  | 0.0842  | -0.0224 | 0.5503  | 0.0435  | -0.0332 |
| MSPD9b  | 0.4332  | 0.1804  | 0.0132  | 0.0519  | -0.0955 | 0.1996  | -0.0296 | 0.1164  |
| MSPD9c  | 0.7633  | 0.0442  | 0.0060  | 0.0653  | 0.0742  | -0.0593 | 0.0221  | -0.0312 |
| MSPD9d  | 0.7665  | 0.0563  | 0.0048  | 0.0832  | 0.0640  | -0.0389 | 0.0162  | -0.0743 |
| MSPD9e  | 0.7510  | 0.0701  | 0.0183  | 0.0930  | 0.04590 | -0.0448 | 0.0162  | -0.0229 |
| MSPD10a | 0.0723  | 0.7964  | -0.0192 | -0.0116 | -0.0056 | 0.0574  | 0.0038  | -0.0108 |
| MSPD10b | 0.0493  | 0.8292  | -0.0221 | 0.0491  | -0.0729 | 0.0511  | 0.0119  | -0.0297 |
| MSPD10c | -0.0128 | 0.7182  | 0.0279  | 0.0343  | -0.1435 | 0.0402  | -0.0303 | -0.0194 |
| MSPD10d | -0.0099 | 0.7406  | -0.0080 | 0.0542  | -0.1221 | 0.0214  | -0.0027 | 0.0567  |
| MSPD10e | 0.0067  | 0.6196  | 0.0215  | 0.0106  | -0.0886 | 0.0473  | -0.0359 | 0.0501  |
| MSPD10f | -0.0259 | 0.8367  | -0.0172 | -0.0383 | 0.0609  | 0.0497  | 0.0061  | -0.0098 |

|         |         |         |         |         |         |         |         |         |
|---------|---------|---------|---------|---------|---------|---------|---------|---------|
| MSPD10g | -0.0698 | 0.6760  | 0.0372  | 0.0180  | -0.1316 | 0.0337  | -0.0527 | 0.0045  |
| MSPD10h | 0.0557  | 0.8011  | 0.0181  | -0.0690 | 0.0280  | 0.0031  | 0.0041  | -0.0089 |
| MSPD10i | 0.0617  | 0.8441  | 0.0072  | -0.0144 | 0.0203  | -0.0215 | 0.0112  | 0.0078  |
| MSPD10j | -0.0089 | 0.8161  | 0.0099  | -0.0489 | 0.1268  | 0.0023  | -0.0256 | -0.0130 |
| MIQ11   | 0.0211  | -0.0439 | 0.0161  | 0.6929  | -0.0172 | -0.0400 | -0.0258 | 0.0408  |
| MIQ12   | 0.0146  | 0.0614  | -0.0052 | 0.0122  | -0.7937 | -0.0795 | 0.0497  | 0.0528  |
| MIQ13   | 0.0033  | 0.0021  | -0.0015 | 0.0258  | 0.8361  | 0.0335  | -0.0595 | 0.1111  |
| TCS6    | -0.0240 | 0.0116  | -0.0676 | 0.7752  | 0.0897  | 0.0092  | 0.0702  | -0.1122 |
| TCS7    | -0.0266 | 0.0168  | -0.0176 | 0.0698  | -0.7920 | 0.0008  | 0.1240  | -0.0229 |
| TCS8    | -0.0354 | -0.0409 | -0.0023 | 0.0713  | 0.8011  | 0.1303  | -0.0556 | -0.0000 |
| OSRI19  | -0.0391 | 0.0455  | -0.0368 | 0.1554  | 0.0501  | 0.0843  | -0.0390 | 0.0408  |
| OSRI20  | -0.0708 | -0.0672 | -0.0032 | 0.4686  | -0.0085 | 0.1060  | 0.0335  | -0.2693 |
| SOQ4a   | 0.0003  | -0.0181 | 0.5984  | 0.0925  | 0.0869  | 0.03840 | -0.6015 | -0.0952 |
| SOQ4b   | 0.0553  | -0.0319 | 0.4247  | 0.0138  | -0.1575 | 0.0282  | 0.6730  | -0.0779 |
| SOQ4c   | -0.0047 | 0.0150  | 0.9060  | -0.0530 | -0.0726 | 0.0158  | -0.0344 | 0.0259  |
| SOQ4d   | 0.0180  | 0.0374  | 0.8850  | -0.0298 | 0.0702  | 0.0091  | 0.1491  | 0.0117  |
| SOQ4e   | 0.0208  | 0.0414  | 0.7734  | -0.0807 | -0.0459 | -0.0349 | -0.0389 | 0.1664  |
| SOQ5a   | 0.0436  | 0.0063  | 0.0795  | 0.0654  | 0.1798  | 0.0576  | -0.6698 | 0.2225  |
| SOQ5b   | -0.0070 | 0.0100  | 0.0225  | 0.0658  | -0.1687 | -0.0315 | 0.7395  | 0.1869  |
| SOQ5c   | 0.0656  | 0.0030  | 0.1119  | -0.1318 | -0.0715 | -0.0177 | -0.1787 | 0.7065  |
| SOQ5d   | 0.0350  | 0.0799  | 0.0757  | -0.0493 | 0.2109  | -0.0165 | 0.2937  | 0.7022  |
| SOQ5e   | 0.0738  | 0.0255  | 0.0454  | -0.1260 | 0.0176  | -0.0738 | -0.0313 | 0.7813  |
| MSPD10k | -0.0300 | 0.9125  | 0.0151  | -0.0369 | 0.0258  | -0.0714 | 0.0001  | 0.0017  |
| MSPD10l | -0.0324 | 0.9530  | 0.0209  | -0.0076 | 0.0241  | -0.0736 | -0.0141 | -0.0359 |

Table SF98: EFA for Total Sample (Including Supplementary Items): 8 Factors Using Oblimin Rotation.

Based on the EFA results for the entire dataset over the entire sample in Table SF94, we checked the loadings of the data and identified that three factors have very similar items. We hierarchically reduced the number of factors to check whether the items of the factors load on the same factor when we have fewer factors.

We performed a hierarchical reduction of factors to assess whether we could consolidate them and refine the construct of the EFA while preserving the same information. This approach aimed to address the overlap among some factors measuring similar constructs, such as Factors 11, 12, and 13. In our EFA analysis, reducing the number of factors to n=12 revealed constructs similar to those with n=13. However, with n=11, items MSPD8c-e and MSPD9c-e loaded onto separate factors. A further reduction to n=8 showed that BGD and SGD items measuring discrimination against women merged with those measuring discrimination against non-cisgender individuals, resulting in a conflation of gender identity and discrimination.

**Factor 1 (Blatant and Subtle Group Discrimination against women and non-cisgender individuals)**

- MSPD1b: In society, women are visibly rejected.
- MSPD1c: In society, transwomen are visibly rejected.
- MSPD1d: In society, transmen are visibly rejected.
- MSPD1e: In society, non-binary individuals are visibly rejected.
- MSPD2b: Society treats women unfairly.
- MSPD2c: Society treats transwomen unfairly.
- MSPD2d: Society treats transmen unfairly.
- MSPD2e: Society treats non-binary individuals unfairly.

MSPD3b: Women suffer from occupational discrimination.  
MSPD3c: Transwomen suffer from occupational discrimination.  
MSPD3d: Transmen suffer from occupational discrimination.  
MSPD3e: Non-binary individuals suffer from occupational discrimination.  
MSPD4b: Women suffer from discrimination in the health sphere.  
MSPD4c: Transwomen suffer from discrimination in the health sphere.  
MSPD4d: Transmen suffer from discrimination in the health sphere.  
MSPD4e: Non-binary individuals suffer from discrimination in the health sphere.  
MSPD5b: Women suffer from rejection in their daily social relations.  
MSPD5c: Transwomen suffer from rejection in their daily social relations.  
MSPD5d: Transmen suffer from rejection in their daily social relations.  
MSPD5e: Non-binary individuals suffer from rejection in their daily social relations.  
MSPD6b: Women suffer from discrimination by some private institutions (e.g., banks, insurance companies, etc.).  
MSPD6c: Transwomen suffer from discrimination by some private institutions (e.g., banks, insurance companies, etc.).  
MSPD6d: Transmen suffer from discrimination by some private institutions (e.g., banks, insurance companies, etc.).  
MSPD6e: Non-binary individuals suffer from discrimination by some private institutions (e.g., banks, insurance companies, etc.).  
MSPD7b: Society mistrusts women.  
MSPD7c: Society mistrusts transwomen.  
MSPD7d: Society mistrusts transmen.  
MSPD7e: Society mistrusts non-binary individuals.  
MSPD8b: Even when people seem to accept women, I think that, deep down, they have some misgivings.  
MSPD8c: Even when people seem to accept transwomen, I think that, deep down, they have some misgivings.  
MSPD8d: Even when people seem to accept transmen, I think that, deep down, they have some misgivings.  
MSPD8e: Even when people seem to accept non-binary individuals, I think that, deep down, they have some misgivings.  
MSPD9c: Even though there is no express rejection, people treat transwomen differently.  
MSPD9b: Even though there is no express rejection, people treat women differently.  
MSPD9c: Even though there is no express rejection, people treat transwomen differently.  
MSPD9d: Even though there is no express rejection, people treat transmen differently.  
MSPD9e: Even though there is no express rejection, people treat non-binary individuals differently.

**Factor 2 (Blatant and Subtle Individual Discrimination)**

MSPD10a: I have felt personally rejected for being a (gender).  
MSPD10b: I have been treated unfairly for being a (gender).  
MSPD10c: I have been discriminated at work for being a (gender).  
MSPD10d: I have been discriminated in the health sphere for being a (gender).  
MSPD10e: I have been discriminated in the legal sphere for being a (gender).  
MSPD10f: I have been rejected in my daily social relations for being a (gender).  
MSPD10g: I have been the target of discriminatory actions by some private institutions (e.g., banks, insurance companies, etc.) for being a (gender).  
MSPD10h: Even when people seem to accept me, deep down, I think they have some misgivings because I am a (gender).  
MSPD10i: Even though there is no express rejection, people treat me differently when they see I am a (gender).  
MSPD10j: I feel that people mistrust me for being a (gender).  
MSPD10k: I feel discriminated by others based on my gender.  
MSPD10l: If I think about how I am perceived by others, others discriminate against me because I am a (gender).

**Factor 3 (Sexual relationships with women and non-cisgender individuals)**

SOQ1b: In the past 12 months, has/have your romantic relationship(s) been with transmen?  
SOQ1c: In the past 12 months, has/have your romantic relationship(s) been with women?  
SOQ1d: In the past 12 months, has/have your romantic relationship(s) been with transwomen?  
SOQ1e: In the past 12 months, has/have your romantic relationship(s) been with non-binary individuals?  
SOQ3b: In the past 12 months, when you had sex, was it with transmen?  
SOQ3c: In the past 12 months, when you had sex, was it with women?  
SOQ3d: In the past 12 months, when you had sex, was it with transwomen?  
SOQ3e: In the past 12 months, when you had sex, was it with non-binary individuals?  
SOQ4a: Over the past 12 months, have you had sexual activities with women?  
SOQ4c: Over the past 12 months, have you had sexual activities with transwomen?  
SOQ4d: Over the past 12 months, have you had sexual activities with transmen?  
SOQ4e: Over the past 12 months, have you had sexual activities with non-binary individuals?

**Factor 4 (Satisfaction with gender identity and appearance)**

MIQ1: In the past 12 months, have you felt satisfied being a woman?  
MIQ11: In the past 12 months, have you felt contentment with your own gender?  
TCS1: My outward appearance represents my gender identity.  
TCS2: I am happy with the way my appearance expresses my gender identity.  
TCS3: I feel that my mind and body are consistent with one another.  
TCS4: I am happy that I have the gender identity that I do.  
TCS5: I have accepted my gender identity.  
TCS6: My external gender identity (e.g., my body, outward appearance, or how I dress) represents my gender identity.  
OSRI20: My gender identity matches contemporary gender stereotypes assigned by friends, family, co-workers, and others, as well as those imposed by political, educational, media, medical, cultural and social institutions.

**Factor 5 (Feeling as a man and external representation like a man)**

MIQ4: In the past 12 months, have you worn the clothes typically associated with males, such as pants or suits?  
MIQ5: In the past 12 months, have you felt more like a man than like a woman?  
MIQ13: If you think about the self-perception of your gender, how much do you feel as a man?  
TCS8: If I think about the external representation of my gender, I feel like a man.

**Factor 6 (Blatant and Subtle Group Discrimination against men)**

MSPD1a: In society, men are visibly rejected.  
MSPD2a: Society treats men unfairly.  
MSPD3a: Men suffer from occupational discrimination.  
MSPD4a: Men suffer from discrimination in the health sphere.  
MSPD5a: Men suffer from rejection in their daily social relations.  
MSPD6a: Men suffer from discrimination by some private institutions (e.g., banks, insurance companies, etc.).  
MSPD7a: Society mistrusts men.  
MSPD8a: Even when people seem to accept men, I think that, deep down, they have some misgivings.  
MSPD9a: Even though there is no express rejection, people treat men differently.

**Factor 7 (Sexual relationships with men)**

SOQ1a: In the past 12 months, has/have your romantic relationship(s) been with men?  
SOQ2a: In the past 12 months, when you felt sexually attracted, was this to men?  
SOQ3a: In the past 12 months, when you had sex, was it with men?  
SOQ4b: Over the past 12 months, have you had sexual activities with men?  
SOQ5b: If you think about your sexual behavior, how much do you feel attracted to men?

**Factor 8 (Feeling as both men and women, and Sexual attraction to non-cisgender individuals)**

MIQ7: In the past 12 months, have you felt somewhere in between a woman and a man?

SOQ2b: In the past 12 months, when you felt sexually attracted, was this to transmen?  
 SOQ2d: In the past 12 months, when you felt sexually attracted, was this to transwomen?  
 SOQ2e: In the past 12 months, when you felt sexually attracted, was this to non-binary individuals?  
 SOQ5c: If you think about your sexual behavior, how much do you feel attracted to transwomen?  
 SOQ5d: If you think about your sexual behavior, how much do you feel attracted to transmen?  
 SOQ5e: If you think about your sexual behavior, how much do you feel attracted to non-binary individuals?

### 5.7. Exploratory Factor Analysis - All Items - Cisgender

We conducted EFA for the cisgender individuals, Tables SF100 (how participants registered on Prolific.com) and SF102 (when individuals selected female (male) as sex and woman (man) as their gender) on the full dataset.

| Factor | Eigenvalue | VAR    | CUM    |
|--------|------------|--------|--------|
| 1      | 8.2672     | 0.0683 | 0.0683 |
| 2      | 7.5724     | 0.0626 | 0.1309 |
| 3      | 6.2929     | 0.0520 | 0.1829 |
| 4      | 5.6638     | 0.0468 | 0.2297 |
| 5      | 5.6298     | 0.0465 | 0.2762 |
| 6      | 5.2731     | 0.0436 | 0.3198 |
| 7      | 4.6989     | 0.0388 | 0.3587 |
| 8      | 3.9648     | 0.0328 | 0.3914 |
| 9      | 3.4471     | 0.0285 | 0.4199 |
| 10     | 3.0946     | 0.0256 | 0.4455 |
| 11     | 2.8623     | 0.0237 | 0.4691 |
| 12     | 2.7426     | 0.0227 | 0.4918 |
| 13     | 2.6249     | 0.0217 | 0.5135 |

Table SF99: Factors, Eigenvalues, Variance Explained, and Cumulative Variance for Prolific Cisgender Sample: Including Supplementary Items for 13 Factors (Oblimin Rotation).

| Factor | Items                                                      |
|--------|------------------------------------------------------------|
| 1      | MSPD1c-e, MSPD2c-e, MSPD3c-e, MSPD4c-e, MSPD5c-e, MSPD7d-e |
| 2      | MSPD10a-l                                                  |
| 3      | MIQ4, MIQ5, MIQ13, TCS8                                    |
| 4      | MIQ1, TCS1-5, MIQ11, TCS6, OSRI20                          |
| 5      | SOQ1c, 2c, 3c, 4a, 5a                                      |
| 6      | SOQ3a,b,d,e, SOQ4c-e                                       |
| 7      | MSPD1a-9a                                                  |
| 8      | SOQ2b,d,e, SOQ5c,d,e                                       |
| 9      | MSPD1b-9b                                                  |
| 10     | MSPD8c-e                                                   |
| 11     | SOQ1a,b,d,e                                                |
| 12     | MSPD6c-e                                                   |
| 13     | MSPD9c-e                                                   |

Table SF100: Prolific Cisgender Sample: Factor Structure and Items (13 Factors and Oblimin Rotation).

| Items         | F1     | F2     | F3     | F4     | F5     | F6     | F7     | F8     | F9     | F10    | F11    | F12    | F13    |
|---------------|--------|--------|--------|--------|--------|--------|--------|--------|--------|--------|--------|--------|--------|
| <b>MIQ1</b>   | -0.044 | -0.086 | -0.053 | 0.590  | 0.025  | -0.070 | 0.004  | -0.005 | -0.002 | 0.003  | -0.022 | -0.017 | 0.041  |
| <b>MIQ3</b>   | -0.033 | 0.011  | -0.686 | 0.080  | -0.068 | -0.100 | 0.020  | 0.043  | -0.031 | 0.060  | 0.034  | -0.003 | -0.090 |
| <b>MIQ4</b>   | 0.026  | 0.041  | 0.657  | 0.103  | 0.065  | -0.001 | -0.048 | 0.023  | 0.077  | -0.012 | 0.033  | 0.017  | 0.029  |
| <b>MIQ5</b>   | 0.023  | 0.007  | 0.889  | -0.013 | 0.050  | -0.022 | 0.015  | -0.010 | -0.035 | -0.006 | 0.033  | -0.011 | -0.002 |
| <b>MIQ6</b>   | -0.043 | 0.032  | 0.008  | -0.480 | 0.003  | -0.018 | 0.021  | 0.110  | 0.048  | -0.006 | 0.019  | 0.004  | -0.041 |
| <b>MIQ7</b>   | -0.042 | 0.055  | 0.028  | -0.530 | -0.025 | -0.053 | -0.027 | 0.122  | 0.056  | 0.007  | 0.030  | -0.023 | -0.012 |
| <b>MIQ9</b>   | -0.018 | 0.021  | -0.044 | -0.519 | -0.061 | -0.037 | 0.027  | 0.071  | 0.051  | 0.109  | 0.053  | -0.006 | -0.011 |
| <b>MIQ10</b>  | -0.087 | 0.028  | 0.050  | -0.561 | -0.072 | -0.019 | 0.062  | 0.060  | 0.018  | 0.130  | 0.056  | 0.029  | -0.051 |
| <b>TCS1</b>   | -0.003 | -0.006 | 0.126  | 0.662  | -0.076 | -0.086 | -0.002 | -0.035 | -0.049 | 0.069  | 0.013  | -0.003 | -0.027 |
| <b>TCS2</b>   | -0.021 | 0.009  | 0.040  | 0.805  | 0.051  | -0.048 | -0.041 | 0.084  | -0.027 | -0.004 | -0.010 | 0.011  | -0.069 |
| <b>TCS3</b>   | -0.004 | -0.029 | -0.038 | 0.763  | -0.010 | -0.010 | 0.014  | -0.005 | 0.024  | 0.004  | -0.056 | 0.036  | -0.031 |
| <b>TCS4</b>   | 0.007  | -0.024 | -0.096 | 0.842  | 0.022  | 0.023  | 0.051  | 0.025  | -0.009 | 0.001  | -0.021 | -0.024 | -0.010 |
| <b>TCS5</b>   | -0.015 | -0.029 | 0.011  | 0.736  | -0.036 | 0.006  | -0.013 | -0.047 | 0.055  | -0.019 | -0.012 | -0.014 | 0.144  |
| <b>OSRI1</b>  | 0.012  | 0.084  | 0.168  | -0.065 | 0.082  | -0.151 | 0.085  | 0.070  | 0.015  | -0.076 | 0.096  | -0.031 | 0.088  |
| <b>OSRI2</b>  | 0.006  | 0.075  | -0.186 | 0.100  | -0.007 | -0.030 | 0.022  | 0.196  | -0.073 | -0.017 | 0.011  | 0.045  | 0.024  |
| <b>OSRI3</b>  | 0.080  | 0.010  | -0.051 | -0.150 | -0.017 | 0.111  | 0.051  | 0.017  | 0.066  | 0.037  | -0.001 | -0.036 | 0.131  |
| <b>OSRI4</b>  | 0.023  | 0.099  | -0.229 | -0.012 | 0.126  | -0.019 | 0.083  | 0.078  | -0.054 | 0.040  | 0.020  | 0.051  | 0.004  |
| <b>OSRI5</b>  | -0.082 | -0.013 | 0.322  | 0.071  | -0.038 | -0.014 | 0.045  | -0.058 | -0.112 | -0.020 | 0.037  | 0.092  | -0.084 |
| <b>OSRI6</b>  | -0.108 | 0.073  | 0.173  | -0.061 | 0.144  | -0.102 | 0.072  | 0.121  | 0.042  | 0.063  | 0.073  | 0.024  | 0.033  |
| <b>OSRI7</b>  | 0.047  | 0.114  | -0.247 | 0.048  | -0.049 | -0.134 | -0.072 | 0.111  | 0.022  | 0.049  | 0.059  | -0.017 | -0.064 |
| <b>OSRI8</b>  | -0.153 | 0.112  | 0.094  | -0.016 | 0.242  | -0.055 | -0.055 | 0.051  | -0.015 | 0.094  | -0.061 | -0.055 | -0.007 |
| <b>OSRI9</b>  | 0.077  | 0.098  | -0.155 | -0.077 | 0.005  | 0.010  | 0.065  | 0.094  | 0.079  | 0.029  | 0.003  | -0.152 | 0.029  |
| <b>OSRI10</b> | -0.014 | 0.026  | 0.118  | -0.139 | 0.020  | -0.010 | 0.105  | 0.090  | 0.002  | 0.008  | 0.075  | -0.057 | 0.026  |
| <b>OSRI11</b> | 0.052  | 0.126  | -0.176 | -0.062 | 0.045  | -0.009 | 0.113  | 0.110  | -0.023 | 0.031  | 0.049  | -0.081 | -0.004 |
| <b>OSRI12</b> | 0.062  | 0.126  | -0.209 | 0.026  | -0.059 | -0.068 | -0.020 | 0.087  | -0.044 | 0.101  | -0.034 | 0.090  | -0.135 |
| <b>OSRI13</b> | 0.034  | 0.053  | 0.356  | -0.029 | 0.068  | -0.096 | 0.065  | 0.069  | -0.061 | 0.012  | 0.041  | 0.059  | -0.046 |
| <b>OSRI14</b> | -0.052 | 0.063  | -0.254 | 0.126  | 0.092  | -0.038 | 0.093  | 0.068  | -0.043 | 0.116  | -0.061 | 0.067  | -0.107 |
| <b>OSRI15</b> | -0.016 | 0.089  | 0.226  | -0.074 | 0.126  | -0.060 | 0.182  | 0.113  | -0.102 | -0.029 | 0.003  | 0.064  | 0.024  |
| <b>OSRI16</b> | 0.039  | 0.141  | -0.292 | 0.125  | -0.033 | -0.003 | -0.015 | 0.135  | -0.056 | 0.079  | -0.068 | 0.047  | -0.132 |
| <b>OSRI17</b> | 0.021  | 0.072  | 0.155  | -0.055 | 0.160  | -0.033 | 0.070  | 0.065  | -0.052 | 0.043  | -0.005 | -0.029 | -0.044 |

|               |        |        |        |        |        |        |        |        |        |        |        |        |        |
|---------------|--------|--------|--------|--------|--------|--------|--------|--------|--------|--------|--------|--------|--------|
| <b>OSRI18</b> | 0.029  | 0.025  | -0.338 | 0.048  | 0.106  | -0.088 | 0.092  | 0.182  | -0.018 | 0.055  | 0.051  | 0.016  | -0.051 |
| <b>SOQ1a</b>  | -0.018 | 0.035  | -0.086 | 0.062  | -0.788 | 0.039  | -0.057 | -0.047 | 0.012  | 0.041  | 0.309  | 0.027  | -0.019 |
| <b>SOQ1b</b>  | 0.020  | -0.007 | 0.053  | -0.014 | -0.071 | 0.063  | 0.009  | 0.016  | 0.005  | -0.021 | 0.930  | -0.020 | 0.009  |
| <b>SOQ1c</b>  | 0.019  | 0.053  | 0.106  | 0.096  | 0.727  | -0.046 | 0.040  | -0.049 | -0.024 | 0.042  | 0.395  | 0.033  | -0.062 |
| <b>SOQ1d</b>  | -0.018 | -0.013 | -0.012 | -0.054 | 0.021  | 0.071  | 0.000  | 0.032  | -0.010 | -0.014 | 0.893  | 0.014  | 0.007  |
| <b>SOQ1e</b>  | 0.013  | -0.005 | -0.010 | -0.046 | 0.005  | 0.095  | -0.002 | 0.068  | 0.008  | -0.006 | 0.843  | -0.001 | 0.010  |
| <b>SOQ2a</b>  | -0.005 | 0.063  | -0.278 | 0.080  | -0.689 | 0.007  | -0.029 | 0.070  | -0.021 | -0.011 | -0.025 | 0.032  | -0.007 |
| <b>SOQ2b</b>  | -0.043 | 0.074  | 0.050  | 0.032  | -0.112 | 0.061  | -0.001 | 0.703  | -0.051 | -0.033 | 0.080  | 0.040  | 0.010  |
| <b>SOQ2c</b>  | -0.031 | 0.010  | 0.266  | 0.034  | 0.670  | 0.044  | 0.037  | 0.110  | 0.031  | 0.022  | 0.022  | -0.037 | 0.048  |
| <b>SOQ2d</b>  | -0.021 | -0.062 | 0.030  | -0.011 | 0.035  | 0.008  | 0.021  | 0.797  | 0.031  | 0.040  | 0.042  | 0.046  | -0.008 |
| <b>SOQ2e</b>  | 0.002  | 0.009  | -0.015 | -0.082 | 0.047  | 0.028  | -0.030 | 0.721  | 0.040  | 0.012  | 0.041  | -0.006 | 0.045  |
| <b>SOQ3a</b>  | 0.024  | 0.031  | -0.083 | 0.052  | -0.785 | 0.362  | -0.055 | -0.054 | 0.021  | 0.041  | 0.019  | -0.005 | 0.004  |
| <b>SOQ3b</b>  | 0.013  | 0.010  | 0.060  | -0.016 | -0.077 | 0.969  | 0.019  | 0.017  | 0.002  | 0.005  | -0.009 | -0.012 | -0.000 |
| <b>SOQ3c</b>  | -0.002 | 0.020  | 0.114  | 0.116  | 0.719  | 0.418  | 0.012  | -0.050 | -0.038 | 0.015  | 0.006  | 0.017  | -0.018 |
| <b>SOQ3d</b>  | -0.007 | 0.010  | 0.032  | -0.044 | -0.015 | 0.957  | -0.000 | 0.017  | -0.012 | -0.008 | -0.010 | 0.005  | 0.015  |
| <b>SOQ3e</b>  | 0.003  | -0.010 | -0.030 | -0.022 | 0.011  | 0.930  | 0.006  | 0.021  | 0.005  | -0.011 | 0.024  | -0.009 | 0.035  |
| <b>MSPD1a</b> | 0.073  | 0.002  | 0.016  | -0.095 | 0.040  | -0.007 | 0.760  | 0.009  | -0.075 | -0.004 | 0.012  | -0.048 | -0.012 |
| <b>MSPD1b</b> | 0.148  | -0.031 | -0.069 | -0.108 | 0.011  | -0.001 | 0.067  | 0.131  | 0.535  | -0.008 | -0.017 | -0.065 | -0.006 |
| <b>MSPD1c</b> | 0.670  | -0.045 | -0.015 | 0.011  | -0.006 | -0.005 | -0.017 | -0.002 | 0.108  | 0.112  | -0.010 | -0.122 | 0.145  |
| <b>MSPD1d</b> | 0.699  | -0.042 | -0.029 | 0.013  | 0.026  | 0.006  | 0.016  | -0.022 | 0.036  | 0.118  | -0.014 | -0.098 | 0.118  |
| <b>MSPD1e</b> | 0.749  | 0.009  | -0.057 | 0.012  | 0.053  | -0.047 | 0.112  | 0.025  | -0.040 | 0.085  | -0.006 | -0.087 | 0.046  |
| <b>MSPD2a</b> | 0.020  | 0.017  | 0.044  | 0.005  | -0.031 | -0.002 | 0.803  | 0.009  | -0.093 | 0.074  | 0.034  | -0.069 | -0.031 |
| <b>MSPD2b</b> | 0.178  | 0.039  | -0.011 | -0.054 | -0.011 | 0.005  | -0.063 | 0.039  | 0.661  | 0.061  | -0.015 | 0.014  | -0.013 |
| <b>MSPD2c</b> | 0.810  | 0.066  | 0.031  | 0.005  | -0.047 | 0.039  | -0.100 | 0.029  | 0.064  | -0.059 | -0.004 | 0.075  | 0.034  |
| <b>MSPD2d</b> | 0.865  | 0.071  | 0.034  | 0.019  | -0.051 | 0.024  | -0.071 | 0.015  | 0.048  | -0.067 | 0.018  | 0.034  | 0.032  |
| <b>MSPD2e</b> | 0.860  | 0.082  | -0.011 | 0.021  | -0.003 | 0.006  | 0.010  | 0.024  | -0.050 | -0.036 | 0.032  | 0.066  | -0.008 |
| <b>MSPD3a</b> | 0.046  | -0.045 | -0.008 | 0.012  | 0.009  | -0.025 | 0.825  | 0.007  | 0.005  | -0.055 | -0.004 | -0.027 | -0.056 |
| <b>MSPD3b</b> | 0.274  | 0.043  | -0.016 | 0.042  | 0.031  | 0.005  | -0.015 | 0.014  | 0.645  | 0.004  | 0.001  | 0.025  | 0.050  |
| <b>MSPD3c</b> | 0.687  | -0.017 | 0.034  | -0.000 | -0.016 | -0.001 | -0.070 | -0.004 | 0.141  | 0.093  | 0.021  | 0.122  | 0.001  |
| <b>MSPD3d</b> | 0.699  | 0.008  | 0.018  | -0.001 | 0.005  | -0.003 | -0.025 | -0.019 | 0.049  | 0.123  | 0.007  | 0.157  | -0.022 |
| <b>MSPD3e</b> | 0.715  | 0.007  | -0.032 | 0.002  | 0.029  | -0.019 | 0.019  | -0.023 | -0.015 | 0.106  | 0.017  | 0.145  | -0.024 |

|                |        |        |        |        |        |        |        |        |        |        |        |        |        |
|----------------|--------|--------|--------|--------|--------|--------|--------|--------|--------|--------|--------|--------|--------|
| <b>MSPD4a</b>  | 0.027  | -0.000 | 0.059  | 0.007  | -0.025 | 0.065  | 0.726  | 0.025  | 0.040  | -0.014 | -0.027 | -0.005 | -0.056 |
| <b>MSPD4b</b>  | 0.124  | 0.092  | -0.044 | -0.034 | -0.035 | -0.020 | 0.081  | 0.074  | 0.623  | 0.009  | 0.026  | 0.072  | 0.026  |
| <b>MSPD4c</b>  | 0.538  | 0.019  | 0.009  | -0.044 | -0.035 | 0.024  | -0.017 | 0.036  | 0.201  | 0.035  | -0.035 | 0.215  | 0.037  |
| <b>MSPD4d</b>  | 0.554  | 0.009  | 0.001  | -0.063 | -0.029 | 0.001  | -0.003 | -0.007 | 0.180  | 0.022  | -0.029 | 0.224  | 0.058  |
| <b>MSPD4e</b>  | 0.646  | 0.014  | -0.041 | -0.059 | 0.014  | -0.014 | 0.040  | 0.012  | 0.101  | 0.018  | -0.002 | 0.170  | -0.023 |
| <b>MSPD5a</b>  | 0.086  | -0.010 | 0.102  | -0.023 | -0.016 | 0.022  | 0.727  | -0.026 | 0.144  | -0.011 | -0.010 | -0.047 | 0.074  |
| <b>MSPD5b</b>  | 0.167  | 0.098  | 0.000  | 0.003  | -0.021 | 0.030  | 0.145  | 0.061  | 0.598  | 0.038  | -0.029 | -0.034 | -0.087 |
| <b>MSPD5c</b>  | 0.640  | -0.027 | 0.020  | -0.045 | 0.023  | 0.024  | 0.027  | 0.042  | 0.064  | 0.076  | -0.023 | 0.056  | 0.193  |
| <b>MSPD5d</b>  | 0.638  | 0.011  | 0.046  | -0.019 | 0.013  | 0.029  | 0.046  | 0.026  | 0.015  | 0.084  | -0.034 | 0.109  | 0.165  |
| <b>MSPD5e</b>  | 0.693  | 0.004  | -0.006 | -0.023 | 0.046  | -0.031 | 0.101  | 0.005  | -0.027 | 0.088  | 0.019  | 0.110  | 0.082  |
| <b>MSPD6a</b>  | -0.209 | 0.050  | 0.039  | -0.028 | 0.023  | 0.035  | 0.693  | -0.037 | 0.016  | 0.009  | -0.031 | 0.201  | -0.086 |
| <b>MSPD6b</b>  | -0.119 | 0.096  | 0.023  | 0.005  | -0.035 | 0.006  | 0.054  | 0.018  | 0.568  | 0.011  | 0.017  | 0.445  | 0.019  |
| <b>MSPD6c</b>  | 0.109  | 0.008  | 0.028  | -0.016 | -0.037 | -0.006 | -0.062 | 0.015  | 0.078  | 0.031  | 0.001  | 0.800  | 0.094  |
| <b>MSPD6d</b>  | 0.112  | 0.026  | 0.002  | -0.009 | 0.005  | -0.010 | -0.028 | 0.028  | -0.000 | 0.052  | 0.003  | 0.833  | 0.073  |
| <b>MSPD6e</b>  | 0.188  | 0.013  | -0.031 | -0.020 | 0.023  | 0.002  | 0.047  | 0.021  | -0.053 | 0.054  | -0.004 | 0.751  | 0.027  |
| <b>MSPD7a</b>  | -0.076 | 0.119  | 0.018  | 0.046  | 0.018  | -0.017 | 0.613  | -0.004 | 0.094  | 0.002  | 0.079  | 0.013  | 0.084  |
| <b>MSPD7b</b>  | 0.033  | 0.038  | -0.037 | -0.008 | 0.037  | 0.002  | 0.072  | -0.010 | 0.555  | 0.213  | -0.047 | 0.011  | -0.122 |
| <b>MSPD7c</b>  | 0.271  | -0.019 | -0.044 | 0.018  | 0.013  | 0.034  | -0.015 | 0.010  | 0.097  | 0.242  | -0.038 | 0.234  | 0.234  |
| <b>MSPD7d</b>  | 0.321  | -0.002 | -0.029 | 0.035  | -0.009 | 0.014  | 0.033  | -0.027 | 0.041  | 0.235  | -0.025 | 0.277  | 0.181  |
| <b>MSPD7e</b>  | 0.380  | -0.012 | -0.067 | -0.004 | 0.006  | 0.002  | 0.065  | 0.008  | -0.015 | 0.284  | 0.003  | 0.210  | 0.093  |
| <b>MSPD8a</b>  | -0.083 | 0.181  | 0.014  | 0.005  | 0.065  | 0.031  | 0.535  | -0.009 | 0.106  | 0.084  | -0.027 | 0.047  | 0.032  |
| <b>MSPD8b</b>  | -0.090 | 0.155  | 0.017  | -0.012 | 0.019  | -0.025 | 0.074  | 0.043  | 0.504  | 0.295  | 0.038  | 0.076  | -0.029 |
| <b>MSPD8c</b>  | -0.027 | 0.022  | -0.005 | -0.023 | 0.018  | 0.027  | -0.040 | 0.004  | 0.035  | 0.910  | -0.031 | 0.005  | 0.082  |
| <b>MSPD8d</b>  | -0.001 | 0.016  | 0.031  | 0.014  | -0.034 | 0.013  | 0.002  | -0.007 | 0.010  | 0.910  | -0.029 | 0.037  | 0.068  |
| <b>MSPD8e</b>  | 0.093  | 0.012  | -0.031 | 0.006  | -0.006 | -0.039 | 0.027  | -0.007 | -0.004 | 0.871  | 0.029  | -0.007 | 0.025  |
| <b>MSPD9a</b>  | -0.102 | 0.169  | -0.073 | 0.054  | 0.045  | 0.053  | 0.496  | -0.057 | 0.075  | -0.127 | -0.006 | -0.023 | 0.359  |
| <b>MSPD9b</b>  | -0.079 | 0.144  | -0.028 | -0.011 | 0.046  | 0.009  | -0.013 | 0.022  | 0.520  | -0.019 | 0.050  | 0.028  | 0.375  |
| <b>MSPD9c</b>  | 0.058  | -0.003 | 0.013  | 0.010  | -0.001 | 0.014  | -0.049 | 0.028  | 0.009  | 0.148  | -0.009 | 0.059  | 0.824  |
| <b>MSPD9d</b>  | 0.077  | 0.008  | 0.034  | 0.023  | -0.028 | 0.016  | -0.010 | 0.007  | -0.023 | 0.132  | 0.001  | 0.088  | 0.813  |
| <b>MSPD9e</b>  | 0.187  | 0.034  | -0.028 | 0.029  | 0.020  | -0.026 | 0.014  | 0.021  | -0.070 | 0.111  | 0.044  | 0.069  | 0.697  |
| <b>MSPD10a</b> | -0.001 | 0.686  | -0.033 | 0.012  | -0.028 | -0.007 | 0.143  | -0.018 | 0.107  | -0.012 | -0.006 | 0.008  | 0.101  |

|                |        |        |        |        |        |        |        |        |        |        |        |        |        |
|----------------|--------|--------|--------|--------|--------|--------|--------|--------|--------|--------|--------|--------|--------|
| <b>MSPD10b</b> | -0.015 | 0.697  | -0.095 | 0.025  | -0.042 | -0.013 | 0.109  | -0.013 | 0.118  | -0.041 | 0.011  | -0.008 | 0.160  |
| <b>MSPD10c</b> | -0.051 | 0.686  | -0.136 | 0.050  | -0.007 | -0.048 | 0.077  | 0.040  | 0.028  | -0.029 | 0.043  | 0.070  | 0.078  |
| <b>MSPD10d</b> | -0.031 | 0.686  | -0.114 | 0.013  | -0.026 | 0.002  | -0.030 | 0.042  | 0.121  | -0.048 | -0.036 | 0.078  | -0.009 |
| <b>MSPD10e</b> | -0.055 | 0.550  | -0.063 | -0.035 | -0.027 | -0.008 | 0.056  | 0.045  | 0.092  | -0.003 | 0.045  | 0.072  | 0.052  |
| <b>MSPD10f</b> | 0.042  | 0.798  | 0.118  | -0.035 | -0.075 | -0.016 | 0.098  | 0.020  | -0.018 | 0.019  | -0.022 | -0.009 | -0.044 |
| <b>MSPD10g</b> | -0.024 | 0.729  | -0.051 | -0.016 | -0.000 | -0.016 | -0.021 | 0.042  | 0.019  | -0.054 | 0.028  | 0.079  | -0.058 |
| <b>MSPD10h</b> | -0.008 | 0.819  | -0.004 | -0.034 | 0.028  | 0.021  | 0.027  | -0.032 | 0.030  | 0.075  | -0.004 | 0.002  | 0.008  |
| <b>MSPD10i</b> | -0.000 | 0.826  | -0.087 | 0.001  | 0.082  | -0.045 | 0.003  | -0.033 | 0.041  | 0.032  | 0.016  | 0.022  | 0.011  |
| <b>MSPD10j</b> | -0.007 | 0.792  | 0.136  | -0.069 | 0.019  | 0.037  | 0.017  | -0.023 | -0.002 | 0.076  | -0.042 | 0.001  | -0.054 |
| <b>MIQ11</b>   | 0.029  | -0.009 | -0.031 | 0.611  | 0.048  | -0.010 | 0.007  | -0.078 | 0.063  | -0.006 | 0.039  | -0.019 | -0.026 |
| <b>MIQ12</b>   | -0.013 | 0.048  | -0.864 | -0.009 | -0.066 | 0.001  | -0.045 | -0.013 | 0.017  | -0.012 | -0.001 | 0.009  | 0.008  |
| <b>MIQ13</b>   | -0.027 | -0.037 | 0.881  | 0.023  | 0.018  | -0.029 | 0.064  | 0.033  | 0.008  | 0.017  | 0.028  | -0.011 | -0.002 |
| <b>TCS6</b>    | -0.024 | -0.002 | 0.170  | 0.684  | -0.106 | -0.073 | -0.071 | -0.033 | 0.020  | 0.053  | -0.015 | -0.021 | 0.032  |
| <b>TCS7</b>    | 0.018  | 0.005  | -0.901 | 0.039  | -0.079 | -0.004 | -0.017 | 0.012  | 0.019  | 0.004  | 0.005  | -0.023 | -0.012 |
| <b>TCS8</b>    | -0.005 | -0.010 | 0.886  | 0.054  | 0.064  | -0.015 | 0.063  | 0.049  | -0.027 | 0.027  | -0.003 | -0.003 | -0.048 |
| <b>OSRI19</b>  | 0.088  | 0.012  | -0.047 | 0.084  | 0.187  | -0.097 | 0.081  | -0.024 | -0.093 | 0.065  | 0.091  | 0.027  | -0.131 |
| <b>OSRI20</b>  | 0.007  | -0.028 | 0.032  | 0.385  | -0.013 | -0.080 | 0.039  | -0.084 | -0.089 | 0.080  | -0.011 | -0.026 | 0.064  |
| <b>SOQ4a</b>   | 0.008  | -0.002 | 0.040  | 0.137  | 0.760  | 0.346  | 0.009  | -0.035 | -0.014 | 0.035  | 0.060  | 0.016  | -0.057 |
| <b>SOQ4b</b>   | 0.017  | 0.011  | -0.091 | 0.060  | -0.747 | 0.249  | -0.036 | -0.022 | 0.034  | 0.061  | 0.131  | -0.004 | -0.031 |
| <b>SOQ4c</b>   | -0.017 | -0.014 | -0.054 | -0.012 | 0.053  | 0.778  | 0.002  | 0.055  | -0.004 | 0.002  | 0.185  | 0.013  | -0.014 |
| <b>SOQ4d</b>   | 0.025  | -0.006 | -0.010 | 0.007  | -0.010 | 0.796  | 0.016  | 0.054  | 0.004  | 0.012  | 0.177  | -0.001 | -0.025 |
| <b>SOQ4e</b>   | -0.008 | -0.034 | -0.087 | -0.026 | 0.068  | 0.782  | 0.016  | 0.086  | 0.022  | 0.025  | 0.158  | 0.003  | -0.005 |
| <b>SOQ5a</b>   | 0.003  | 0.024  | 0.277  | 0.071  | 0.647  | 0.053  | 0.011  | 0.088  | 0.050  | 0.057  | 0.006  | -0.057 | 0.008  |
| <b>SOQ5b</b>   | 0.003  | 0.032  | -0.264 | 0.062  | -0.699 | -0.014 | -0.019 | 0.089  | -0.042 | -0.003 | 0.014  | 0.025  | -0.009 |
| <b>SOQ5c</b>   | -0.004 | -0.064 | -0.005 | -0.018 | 0.068  | -0.008 | 0.014  | 0.824  | -0.011 | 0.034  | -0.010 | 0.001  | -0.002 |
| <b>SOQ5d</b>   | 0.019  | 0.071  | 0.012  | 0.081  | -0.100 | 0.052  | 0.006  | 0.786  | -0.014 | -0.032 | 0.006  | -0.013 | -0.031 |
| <b>SOQ5e</b>   | 0.032  | 0.001  | -0.006 | -0.075 | 0.026  | 0.031  | -0.045 | 0.794  | 0.039  | -0.033 | -0.040 | -0.036 | 0.035  |
| <b>MSPD10k</b> | 0.050  | 0.967  | 0.027  | -0.007 | -0.014 | 0.025  | -0.077 | 0.014  | -0.050 | 0.013  | -0.007 | -0.055 | -0.022 |
| <b>MSPD10l</b> | 0.068  | 0.958  | 0.012  | -0.042 | 0.010  | -0.006 | -0.042 | 0.009  | -0.067 | -0.004 | -0.011 | -0.028 | -0.014 |

Table SF101: EFA for Prolific Cisgender Sample (Including Supplementary Items): 13 Factors Using Oblimin Rotation.

| Factor | Items                                                      |
|--------|------------------------------------------------------------|
| 1      | MSPD1c-e, MSPD2c-e, MSPD3c-e, MSPD4c-e, MSPD5c-e, MSPD7c-e |
| 2      | MSPD10a-l                                                  |
| 3      | MIQ3, MIQ12, TCS7, OSRI14, OSRI18                          |
| 4      | MIQ1, TCS1-5, MIQ11, TCS6, OSRI20                          |
| 5      | SOQ1c, SOQ2c, SOQ3c, SOQ4a, SOQ5a                          |
| 6      | SOQ3a, SOQ3b, SOQ3d, SOQ3e, SOQ4c-e                        |
| 7      | MSPD1a-9a                                                  |
| 8      | SOQ2b, SOQ2d, SOQ2e, SOQ5c, SOQ5d, SOQ5e                   |
| 9      | MSPD8c-e                                                   |
| 10     | MSPD1b-9b                                                  |
| 11     | SOQ1a, SOQ1b, SOQ1d, SOQ1e                                 |
| 12     | MSPD6c-e                                                   |
| 13     | MSPD9c-e                                                   |

Table SF102: Factor Structure and Items for Self-entered Data (Gender: Woman (Man), Sex: Female Male) (Oblimin Rotation).

Upon comparing the structures of the Tables SF100 and SF102 with the MGSI SF94, several similarities and differences emerge regarding how the items are grouped within each factor. In Factor 1, all tables feature the same items: MSPD1c-e, MSPD2c-e, MSPD3c-e, MSPD4c-e, and MSPD5c-e. The last item varies slightly between tables, with Prolific listing MSPD7d-e and the Self-entered data listing MSPD7c-e. Factor 2 consistently contains MSPD10a-l across all three tables. Factor 3 shows a difference between the tables. The Prolific table lists items MIQ4, MIQ5, MIQ13, and TCS8, which aligns with Factor 4 in the MGSI. In contrast, the Self-entered data table lists MIQ3, MIQ12, TCS7, OSRI14, and OSRI18, which differ from both the MGSI and the Prolific table. Factors 4 and 3 have a notable relationship, as both the Prolific and Self-entered data tables share the same items for Factor 4: MIQ1, TCS1-5, MIQ11, TCS6, and OSRI20, matching Factor 3 in the MGSI. In the Prolific table, Factor 5's items match the MGSI's Factor 9, which includes SOQ1c, SOQ2c, SOQ3c, SOQ4a, and SOQ5a.

Factors 6 and 7 exhibit consistency across the Prolific and Self-entered data tables, with both tables listing MSPD1a-9a, aligning with Factor 6 in the MGSI. Similarly, both tables share items for Factor 10, which consistently includes MSPD1b-9b, matching Factor 10 in the MGSI.

Finally, Factors 11, 12, and 13 in both tables maintain a clear alignment. Factor 11 includes SOQ1a, SOQ1b, SOQ1d, and SOQ1e in the Prolific table, partially matching Factor 8 in the MGSI. Factor 12 features MSPD6c-e, consistent with Factor 13 in the given list, while Factor 13 includes MSPD9c-e, matching Factor 12 in the MGSI.

## 5.8. Exploratory Factor Analysis - All Items - Non-cisgender

We conducted EFA for the non-cisgender individuals, including all items. In Table SF103, we present the eigenvalues, proportion of variance, and cumulative variance for the 13 factors. Table SF105 shows the factor loadings for the 13 factors, while Table SF104 provides an overview of the factors and lists the items with loadings exceeding the 0.40 threshold.

| <b>Factor</b> | <b>Eigenvalue</b> | <b>VAR</b> | <b>CUM</b> |
|---------------|-------------------|------------|------------|
| 1             | 10.6207           | 0.0878     | 0.0878     |
| 2             | 7.5434            | 0.0623     | 0.1501     |
| 3             | 5.2938            | 0.0438     | 0.1939     |
| 4             | 4.7284            | 0.0391     | 0.2329     |
| 5             | 4.4357            | 0.0367     | 0.2696     |
| 6             | 4.1146            | 0.0340     | 0.3036     |
| 7             | 4.1134            | 0.0340     | 0.3376     |
| 8             | 4.0830            | 0.0337     | 0.3713     |
| 9             | 3.7341            | 0.0309     | 0.4022     |
| 10            | 3.5790            | 0.0296     | 0.4318     |
| 11            | 3.4505            | 0.0285     | 0.4603     |
| 12            | 2.1209            | 0.0175     | 0.4778     |
| 13            | 1.2094            | 0.0100     | 0.4878     |

Table SF103: Factors, Eigenvalues, Variance Explained, and Cumulative Variance for Prolific Non-cisgender Sample: Including Supplementary Items for 13 Factors (Oblimin Rotation).

| <b>Factor</b> | <b>Items</b>                                                         |
|---------------|----------------------------------------------------------------------|
| 1             | MSPD1c-e, MSPD2c-e, MSPD3c-e, MSPD4c-e, MSPD5c-e, MSPD7c-e, MSPD9c-e |
| 2             | MSPD10a-l                                                            |
| 3             | MIQ1, TCS1-5, MIQ11, TCS6, OSRI20                                    |
| 4             | MSP1a-9a                                                             |
| 5             | SOQ1a-3a, SOQ4b, SOQ5b                                               |
| 6             | SOQ2b, d-e, SOQ5c-e                                                  |
| 7             | MIQ4, MIQ5, MIQ10, MIQ13, TCS8                                       |
| 8             | SOQ1c, SOQ2c, SOQ3c, SOQ4a, SOQ5a                                    |
| 9             | MSPD1b-7b, MSPD9b                                                    |
| 10            | SOQ1e, SOQ3b, d, e, SOQ4c-e                                          |
| 11            | MSPD8b-e                                                             |
| 12            | MSPD6c-e                                                             |
| 13            | SOQ1b, SOQ1d                                                         |

Table SF104: Prolific Non-cisgender Sample: Factor Structure and Items (13 Factors and Oblimin Rotation).

| Items         | F1     | F2     | F3     | F4     | F5     | F6     | F7     | F8     | F9     | F10    | F11    | F12    | F13    |
|---------------|--------|--------|--------|--------|--------|--------|--------|--------|--------|--------|--------|--------|--------|
| <b>MIQ1</b>   | 0.018  | -0.051 | 0.517  | -0.129 | 0.010  | 0.190  | 0.033  | -0.005 | 0.012  | -0.014 | 0.028  | 0.055  | 0.032  |
| <b>MIQ3</b>   | -0.037 | 0.055  | 0.121  | 0.090  | -0.033 | 0.112  | -0.624 | -0.066 | -0.002 | 0.137  | 0.014  | -0.010 | -0.001 |
| <b>MIQ4</b>   | 0.037  | -0.051 | 0.052  | -0.057 | -0.004 | -0.114 | 0.629  | 0.035  | 0.118  | -0.051 | 0.025  | -0.009 | 0.048  |
| <b>MIQ5</b>   | 0.007  | 0.006  | 0.024  | 0.028  | -0.087 | 0.126  | 0.774  | -0.017 | -0.046 | 0.063  | -0.026 | 0.016  | -0.029 |
| <b>MIQ6</b>   | -0.043 | 0.082  | -0.302 | 0.027  | -0.104 | 0.192  | -0.049 | -0.068 | 0.076  | 0.001  | -0.004 | -0.084 | 0.031  |
| <b>MIQ7</b>   | -0.001 | 0.042  | -0.312 | -0.055 | -0.164 | 0.222  | -0.064 | -0.121 | 0.132  | 0.032  | 0.029  | -0.049 | 0.063  |
| <b>MIQ9</b>   | 0.078  | 0.103  | -0.433 | 0.019  | -0.008 | 0.110  | 0.216  | -0.017 | -0.003 | 0.062  | 0.054  | -0.064 | 0.003  |
| <b>MIQ10</b>  | 0.077  | 0.172  | -0.308 | 0.011  | 0.016  | 0.059  | 0.307  | 0.072  | -0.039 | 0.034  | 0.030  | -0.091 | 0.059  |
| <b>TCS1</b>   | 0.003  | 0.049  | 0.773  | 0.039  | -0.018 | -0.097 | 0.107  | -0.030 | -0.012 | -0.016 | -0.007 | -0.075 | 0.024  |
| <b>TCS2</b>   | -0.068 | 0.013  | 0.863  | -0.000 | -0.020 | -0.031 | 0.017  | -0.019 | -0.015 | 0.005  | -0.018 | -0.018 | 0.008  |
| <b>TCS3</b>   | -0.004 | -0.071 | 0.809  | 0.021  | 0.003  | -0.018 | -0.105 | 0.038  | -0.021 | 0.006  | -0.024 | -0.005 | 0.019  |
| <b>TCS4</b>   | 0.012  | -0.075 | 0.684  | -0.036 | -0.027 | 0.168  | -0.063 | 0.067  | 0.049  | 0.031  | 0.057  | 0.057  | -0.021 |
| <b>TCS5</b>   | 0.144  | 0.028  | 0.610  | -0.106 | 0.050  | 0.097  | 0.045  | 0.078  | 0.014  | 0.001  | 0.023  | 0.065  | -0.070 |
| <b>OSRI1</b>  | -0.015 | 0.090  | 0.007  | 0.186  | -0.012 | 0.069  | 0.079  | -0.019 | -0.044 | -0.057 | 0.107  | -0.060 | 0.090  |
| <b>OSRI2</b>  | -0.023 | 0.161  | 0.178  | 0.015  | 0.033  | 0.122  | 0.012  | -0.164 | 0.162  | 0.034  | -0.047 | 0.043  | -0.012 |
| <b>OSRI3</b>  | 0.136  | 0.021  | -0.132 | -0.060 | 0.127  | 0.051  | 0.024  | 0.073  | 0.203  | 0.011  | 0.039  | -0.063 | -0.036 |
| <b>OSRI4</b>  | 0.001  | 0.075  | -0.004 | -0.024 | 0.083  | -0.001 | -0.015 | 0.054  | 0.136  | -0.058 | 0.032  | -0.066 | -0.003 |
| <b>OSRI5</b>  | -0.169 | -0.020 | -0.000 | 0.083  | -0.007 | -0.066 | 0.057  | 0.088  | -0.158 | -0.007 | 0.031  | -0.029 | -0.014 |
| <b>OSRI6</b>  | -0.025 | 0.068  | 0.043  | 0.168  | -0.072 | 0.116  | 0.102  | 0.070  | 0.060  | -0.049 | 0.097  | -0.066 | 0.067  |
| <b>OSRI7</b>  | -0.054 | 0.171  | 0.151  | -0.035 | 0.079  | 0.107  | -0.132 | -0.103 | 0.072  | -0.038 | -0.049 | -0.029 | 0.016  |
| <b>OSRI8</b>  | -0.137 | 0.128  | 0.022  | 0.191  | -0.054 | -0.043 | 0.119  | 0.069  | -0.007 | -0.069 | 0.060  | -0.070 | 0.039  |
| <b>OSRI9</b>  | 0.033  | 0.111  | -0.122 | 0.048  | 0.027  | 0.127  | -0.098 | -0.002 | 0.059  | -0.030 | 0.066  | 0.070  | -0.043 |
| <b>OSRI10</b> | -0.023 | 0.048  | -0.072 | 0.190  | 0.072  | -0.061 | 0.049  | 0.052  | 0.088  | -0.006 | 0.001  | -0.086 | 0.057  |
| <b>OSRI11</b> | -0.033 | 0.090  | 0.021  | 0.085  | 0.103  | 0.131  | -0.119 | -0.003 | 0.119  | 0.054  | 0.063  | -0.008 | 0.023  |
| <b>OSRI12</b> | -0.034 | 0.058  | 0.042  | -0.038 | 0.072  | 0.110  | -0.115 | -0.135 | 0.191  | 0.026  | 0.027  | 0.021  | 0.055  |
| <b>OSRI13</b> | -0.019 | 0.082  | 0.106  | 0.169  | -0.093 | 0.116  | 0.190  | 0.136  | -0.017 | -0.124 | -0.031 | 0.033  | 0.074  |
| <b>OSRI14</b> | -0.038 | 0.138  | 0.211  | 0.044  | 0.091  | 0.053  | -0.091 | -0.111 | 0.083  | -0.039 | -0.046 | 0.002  | 0.020  |
| <b>OSRI15</b> | 0.019  | 0.121  | 0.013  | 0.213  | -0.052 | 0.122  | 0.092  | 0.070  | 0.038  | -0.047 | -0.040 | -0.083 | 0.027  |
| <b>OSRI16</b> | -0.018 | 0.147  | 0.167  | 0.106  | 0.076  | 0.190  | -0.202 | -0.125 | 0.042  | -0.071 | -0.011 | -0.042 | 0.023  |
| <b>OSRI17</b> | -0.047 | 0.069  | 0.057  | 0.171  | -0.018 | 0.000  | 0.055  | 0.053  | 0.071  | 0.011  | -0.027 | -0.026 | 0.012  |

|               |        |        |        |        |        |        |        |        |        |        |        |        |        |
|---------------|--------|--------|--------|--------|--------|--------|--------|--------|--------|--------|--------|--------|--------|
| <b>OSRI18</b> | -0.000 | 0.117  | 0.092  | -0.031 | 0.042  | 0.152  | -0.115 | -0.143 | 0.175  | 0.068  | -0.010 | 0.045  | -0.020 |
| <b>SOQ1a</b>  | 0.066  | -0.011 | 0.013  | -0.010 | 0.816  | -0.056 | -0.074 | -0.059 | 0.007  | -0.113 | 0.018  | -0.010 | 0.279  |
| <b>SOQ1b</b>  | -0.069 | 0.046  | -0.048 | -0.008 | 0.370  | -0.004 | 0.145  | 0.250  | 0.027  | 0.212  | 0.022  | 0.068  | 0.519  |
| <b>SOQ1c</b>  | 0.030  | -0.025 | -0.001 | -0.008 | -0.152 | 0.006  | 0.047  | 0.849  | 0.009  | -0.057 | -0.024 | -0.031 | 0.328  |
| <b>SOQ1d</b>  | -0.016 | 0.040  | -0.071 | 0.015  | 0.202  | 0.065  | -0.044 | 0.422  | -0.071 | 0.252  | -0.025 | 0.083  | 0.441  |
| <b>SOQ1e</b>  | 0.114  | -0.008 | -0.006 | -0.002 | -0.153 | 0.073  | -0.021 | -0.044 | -0.016 | 0.724  | -0.010 | -0.017 | 0.481  |
| <b>SOQ2a</b>  | 0.008  | 0.031  | 0.081  | 0.019  | 0.634  | 0.241  | -0.016 | -0.271 | 0.002  | -0.119 | 0.058  | -0.030 | 0.105  |
| <b>SOQ2b</b>  | -0.075 | 0.096  | 0.012  | -0.011 | 0.295  | 0.642  | 0.212  | -0.105 | 0.098  | -0.043 | 0.071  | -0.007 | 0.141  |
| <b>SOQ2c</b>  | 0.085  | 0.023  | -0.025 | 0.068  | -0.234 | 0.504  | 0.008  | 0.522  | -0.047 | -0.173 | -0.007 | -0.054 | -0.089 |
| <b>SOQ2d</b>  | 0.017  | 0.053  | -0.074 | 0.033  | 0.031  | 0.788  | -0.057 | 0.180  | -0.012 | -0.010 | -0.017 | 0.041  | -0.009 |
| <b>SOQ2e</b>  | 0.085  | 0.025  | -0.024 | -0.040 | -0.114 | 0.735  | -0.025 | -0.086 | 0.097  | 0.233  | 0.014  | -0.058 | 0.027  |
| <b>SOQ3a</b>  | 0.058  | -0.035 | -0.023 | 0.006  | 0.889  | -0.044 | -0.068 | 0.003  | -0.003 | 0.082  | -0.007 | 0.011  | -0.147 |
| <b>SOQ3b</b>  | -0.094 | 0.026  | -0.031 | -0.009 | 0.469  | -0.017 | 0.139  | 0.293  | 0.037  | 0.470  | 0.039  | 0.091  | -0.084 |
| <b>SOQ3c</b>  | -0.020 | -0.023 | 0.006  | 0.012  | 0.019  | -0.013 | 0.081  | 0.865  | 0.022  | 0.153  | 0.012  | -0.019 | -0.128 |
| <b>SOQ3d</b>  | -0.087 | 0.008  | -0.061 | 0.037  | 0.342  | 0.049  | -0.004 | 0.426  | -0.036 | 0.470  | 0.025  | 0.107  | -0.126 |
| <b>SOQ3e</b>  | 0.022  | 0.019  | -0.013 | 0.020  | 0.008  | 0.071  | 0.019  | 0.041  | 0.010  | 0.919  | -0.001 | -0.013 | -0.075 |
| <b>MSPD1a</b> | 0.024  | 0.049  | 0.038  | 0.653  | 0.025  | -0.021 | 0.020  | 0.069  | 0.037  | -0.037 | -0.030 | -0.104 | -0.023 |
| <b>MSPD1b</b> | 0.088  | 0.014  | -0.058 | 0.028  | 0.041  | 0.056  | -0.016 | 0.003  | 0.545  | -0.006 | 0.041  | -0.031 | 0.031  |
| <b>MSPD1c</b> | 0.655  | 0.061  | 0.029  | -0.029 | 0.020  | 0.013  | 0.057  | 0.004  | 0.174  | 0.036  | 0.104  | -0.132 | -0.017 |
| <b>MSPD1d</b> | 0.605  | 0.010  | -0.011 | 0.071  | 0.043  | -0.031 | -0.004 | 0.000  | 0.058  | -0.032 | 0.109  | -0.025 | -0.012 |
| <b>MSPD1e</b> | 0.629  | 0.012  | 0.017  | 0.076  | 0.058  | 0.019  | 0.011  | 0.010  | 0.052  | 0.005  | 0.082  | 0.055  | 0.026  |
| <b>MSPD2a</b> | 0.053  | -0.035 | -0.042 | 0.757  | -0.004 | -0.040 | 0.041  | -0.039 | -0.063 | 0.039  | 0.001  | 0.017  | 0.046  |
| <b>MSPD2b</b> | 0.294  | -0.011 | -0.008 | -0.044 | 0.025  | 0.032  | -0.022 | 0.043  | 0.685  | 0.008  | -0.006 | -0.074 | 0.011  |
| <b>MSPD2c</b> | 0.792  | -0.012 | -0.049 | -0.089 | 0.002  | 0.014  | 0.028  | -0.012 | 0.141  | 0.047  | -0.009 | -0.077 | 0.022  |
| <b>MSPD2d</b> | 0.812  | -0.002 | -0.103 | 0.005  | 0.011  | -0.032 | -0.018 | -0.004 | 0.028  | 0.007  | 0.002  | 0.006  | 0.005  |
| <b>MSPD2e</b> | 0.808  | -0.019 | -0.036 | -0.003 | 0.022  | 0.035  | -0.068 | 0.016  | 0.017  | -0.001 | -0.008 | 0.072  | 0.048  |
| <b>MSPD3a</b> | -0.035 | -0.003 | 0.027  | 0.787  | -0.036 | 0.045  | -0.006 | -0.001 | -0.028 | 0.024  | 0.028  | -0.039 | -0.005 |
| <b>MSPD3b</b> | 0.287  | -0.001 | 0.036  | -0.062 | 0.014  | 0.006  | -0.049 | 0.052  | 0.669  | -0.005 | -0.053 | -0.022 | 0.026  |
| <b>MSPD3c</b> | 0.721  | -0.009 | 0.007  | -0.117 | -0.012 | 0.067  | 0.004  | -0.003 | 0.104  | -0.011 | 0.008  | 0.047  | 0.046  |
| <b>MSPD3d</b> | 0.730  | 0.028  | -0.031 | -0.015 | -0.014 | 0.052  | -0.049 | -0.021 | -0.058 | -0.009 | -0.018 | 0.114  | 0.019  |
| <b>MSPD3e</b> | 0.743  | 0.034  | 0.024  | 0.023  | 0.025  | 0.065  | -0.079 | -0.013 | -0.066 | -0.021 | -0.013 | 0.190  | 0.089  |

|                |        |        |        |        |        |        |        |        |        |        |        |        |        |
|----------------|--------|--------|--------|--------|--------|--------|--------|--------|--------|--------|--------|--------|--------|
| <b>MSPD4a</b>  | 0.072  | -0.029 | 0.019  | 0.782  | -0.019 | 0.001  | 0.006  | -0.015 | 0.004  | 0.017  | -0.006 | -0.081 | 0.018  |
| <b>MSPD4b</b>  | 0.253  | 0.003  | -0.014 | -0.002 | 0.003  | 0.088  | 0.015  | -0.014 | 0.625  | -0.002 | 0.019  | 0.040  | -0.030 |
| <b>MSPD4c</b>  | 0.709  | 0.066  | 0.010  | -0.076 | 0.030  | 0.009  | 0.045  | -0.027 | 0.164  | 0.035  | -0.008 | 0.013  | -0.040 |
| <b>MSPD4d</b>  | 0.747  | 0.065  | -0.024 | -0.032 | 0.014  | 0.008  | 0.034  | -0.001 | 0.093  | 0.012  | -0.008 | 0.036  | -0.043 |
| <b>MSPD4e</b>  | 0.675  | 0.052  | 0.018  | -0.010 | -0.007 | 0.073  | -0.021 | -0.070 | 0.024  | 0.050  | -0.012 | 0.179  | 0.039  |
| <b>MSPD5a</b>  | 0.102  | -0.035 | -0.029 | 0.726  | 0.035  | 0.000  | 0.075  | -0.032 | 0.035  | -0.028 | -0.047 | -0.017 | -0.122 |
| <b>MSPD5b</b>  | 0.071  | 0.082  | -0.011 | 0.200  | 0.006  | 0.030  | -0.059 | 0.068  | 0.553  | 0.005  | 0.003  | 0.110  | -0.086 |
| <b>MSPD5c</b>  | 0.704  | 0.075  | 0.005  | 0.032  | 0.040  | -0.025 | -0.002 | 0.038  | 0.028  | 0.006  | 0.053  | 0.113  | -0.099 |
| <b>MSPD5d</b>  | 0.674  | 0.092  | -0.025 | 0.051  | 0.039  | -0.037 | -0.031 | 0.030  | -0.039 | -0.002 | 0.055  | 0.173  | -0.114 |
| <b>MSPD5e</b>  | 0.677  | 0.065  | 0.049  | 0.094  | 0.063  | 0.029  | -0.048 | 0.037  | -0.057 | -0.001 | 0.025  | 0.253  | -0.045 |
| <b>MSPD6a</b>  | -0.183 | -0.036 | -0.039 | 0.760  | -0.003 | 0.012  | -0.042 | -0.013 | -0.001 | 0.024  | 0.030  | 0.135  | 0.081  |
| <b>MSPD6b</b>  | -0.185 | 0.049  | -0.068 | 0.013  | -0.058 | -0.014 | 0.007  | -0.021 | 0.734  | -0.034 | 0.022  | 0.388  | 0.002  |
| <b>MSPD6c</b>  | 0.243  | 0.051  | 0.008  | -0.108 | -0.047 | 0.024  | 0.042  | -0.043 | 0.171  | -0.004 | 0.055  | 0.637  | -0.017 |
| <b>MSPD6d</b>  | 0.281  | 0.042  | -0.009 | -0.053 | -0.046 | -0.010 | 0.039  | -0.040 | 0.076  | -0.028 | 0.054  | 0.693  | -0.008 |
| <b>MSPD6e</b>  | 0.243  | 0.079  | 0.028  | -0.026 | -0.014 | 0.025  | 0.020  | -0.040 | 0.053  | -0.023 | 0.056  | 0.742  | 0.045  |
| <b>MSPD7a</b>  | 0.135  | 0.065  | 0.018  | 0.459  | 0.051  | -0.027 | 0.105  | -0.015 | 0.080  | 0.032  | -0.042 | -0.050 | -0.064 |
| <b>MSPD7b</b>  | -0.049 | -0.012 | -0.087 | 0.133  | -0.032 | 0.065  | -0.067 | -0.005 | 0.475  | 0.004  | 0.110  | 0.081  | 0.022  |
| <b>MSPD7c</b>  | 0.615  | 0.037  | -0.081 | -0.057 | 0.029  | 0.022  | 0.132  | 0.016  | 0.082  | -0.013 | 0.136  | -0.032 | 0.012  |
| <b>MSPD7d</b>  | 0.594  | -0.009 | -0.065 | 0.024  | 0.040  | 0.000  | 0.070  | 0.042  | 0.035  | -0.078 | 0.159  | 0.100  | 0.030  |
| <b>MSPD7e</b>  | 0.593  | 0.017  | -0.030 | 0.055  | 0.022  | 0.001  | 0.070  | 0.035  | 0.009  | -0.026 | 0.143  | 0.126  | 0.049  |
| <b>MSPD8a</b>  | -0.015 | 0.079  | -0.032 | 0.498  | 0.047  | -0.043 | 0.011  | -0.006 | 0.175  | -0.006 | 0.073  | -0.052 | -0.031 |
| <b>MSPD8b</b>  | -0.135 | 0.093  | -0.010 | 0.154  | -0.024 | 0.008  | -0.075 | -0.017 | 0.407  | -0.018 | 0.560  | -0.071 | -0.018 |
| <b>MSPD8c</b>  | 0.008  | -0.002 | -0.014 | -0.040 | -0.007 | -0.017 | 0.002  | -0.010 | -0.004 | 0.018  | 0.960  | -0.032 | -0.012 |
| <b>MSPD8d</b>  | 0.016  | -0.008 | 0.003  | -0.005 | 0.010  | -0.008 | 0.002  | 0.025  | -0.033 | -0.037 | 0.980  | 0.015  | -0.006 |
| <b>MSPD8e</b>  | 0.058  | -0.008 | 0.004  | 0.016  | -0.020 | 0.007  | -0.040 | -0.000 | -0.054 | 0.006  | 0.931  | 0.046  | 0.026  |
| <b>MSPD9a</b>  | -0.023 | 0.093  | 0.048  | 0.553  | -0.006 | -0.022 | 0.039  | -0.082 | 0.130  | 0.062  | -0.043 | 0.022  | 0.024  |
| <b>MSPD9b</b>  | 0.125  | 0.098  | 0.066  | 0.087  | -0.053 | -0.004 | -0.013 | 0.007  | 0.540  | 0.081  | 0.125  | -0.008 | -0.000 |
| <b>MSPD9c</b>  | 0.572  | 0.049  | 0.057  | -0.128 | -0.034 | -0.035 | 0.103  | 0.003  | 0.107  | 0.043  | 0.200  | -0.029 | -0.043 |
| <b>MSPD9d</b>  | 0.578  | 0.076  | 0.060  | -0.066 | -0.052 | -0.053 | 0.047  | -0.007 | 0.017  | 0.042  | 0.207  | 0.025  | -0.045 |
| <b>MSPD9e</b>  | 0.598  | 0.081  | 0.100  | -0.046 | -0.030 | 0.001  | 0.004  | -0.022 | -0.007 | 0.066  | 0.182  | 0.061  | 0.015  |
| <b>MSPD10a</b> | 0.043  | 0.813  | -0.028 | -0.010 | -0.050 | -0.027 | 0.028  | -0.062 | 0.009  | 0.045  | -0.017 | 0.041  | -0.036 |

|                |        |        |        |        |        |        |        |        |        |        |        |        |        |
|----------------|--------|--------|--------|--------|--------|--------|--------|--------|--------|--------|--------|--------|--------|
| <b>MSPD10b</b> | 0.001  | 0.844  | 0.037  | -0.000 | -0.031 | -0.024 | -0.044 | -0.036 | -0.003 | -0.004 | -0.001 | 0.038  | -0.022 |
| <b>MSPD10c</b> | -0.035 | 0.650  | -0.012 | 0.021  | 0.027  | -0.000 | -0.159 | 0.065  | 0.001  | -0.042 | -0.005 | 0.021  | 0.065  |
| <b>MSPD10d</b> | -0.023 | 0.705  | 0.052  | 0.045  | 0.022  | 0.057  | -0.090 | 0.036  | 0.066  | -0.064 | -0.048 | -0.013 | 0.102  |
| <b>MSPD10e</b> | -0.040 | 0.595  | -0.029 | 0.013  | 0.012  | 0.104  | -0.081 | 0.100  | 0.036  | -0.100 | -0.020 | 0.038  | 0.066  |
| <b>MSPD10f</b> | 0.022  | 0.825  | -0.035 | 0.066  | -0.004 | 0.010  | 0.016  | -0.009 | -0.052 | -0.021 | -0.014 | -0.005 | -0.003 |
| <b>MSPD10g</b> | -0.083 | 0.595  | -0.004 | 0.044  | 0.054  | 0.045  | -0.151 | 0.092  | 0.072  | -0.062 | -0.101 | 0.072  | 0.002  |
| <b>MSPD10h</b> | 0.050  | 0.759  | -0.062 | -0.041 | 0.052  | -0.014 | 0.027  | 0.003  | 0.037  | -0.012 | 0.016  | -0.029 | -0.081 |
| <b>MSPD10i</b> | 0.095  | 0.815  | 0.006  | -0.024 | 0.017  | -0.025 | 0.043  | -0.038 | 0.027  | 0.048  | 0.002  | -0.024 | 0.009  |
| <b>MSPD10j</b> | 0.010  | 0.783  | -0.014 | 0.030  | -0.060 | -0.011 | 0.102  | -0.010 | -0.020 | 0.031  | 0.030  | -0.015 | 0.007  |
| <b>MIQ11</b>   | -0.003 | -0.088 | 0.662  | -0.076 | 0.013  | 0.094  | 0.004  | 0.011  | -0.016 | 0.054  | -0.011 | 0.111  | -0.063 |
| <b>MIQ12</b>   | 0.031  | 0.028  | 0.009  | -0.094 | 0.001  | 0.120  | -0.664 | -0.021 | 0.010  | 0.034  | 0.084  | 0.009  | -0.052 |
| <b>MIQ13</b>   | 0.023  | 0.018  | 0.051  | 0.021  | -0.075 | 0.112  | 0.773  | 0.001  | -0.058 | 0.036  | -0.015 | 0.029  | -0.033 |
| <b>TCS6</b>    | -0.021 | 0.033  | 0.811  | 0.050  | -0.010 | -0.133 | 0.080  | -0.027 | 0.002  | 0.005  | 0.006  | -0.027 | 0.016  |
| <b>TCS7</b>    | 0.002  | 0.047  | 0.050  | 0.016  | 0.123  | -0.005 | -0.659 | -0.026 | 0.069  | -0.054 | -0.026 | -0.071 | -0.012 |
| <b>TCS8</b>    | -0.055 | -0.023 | 0.081  | 0.160  | 0.018  | -0.038 | 0.689  | 0.077  | 0.002  | -0.083 | 0.002  | -0.018 | -0.001 |
| <b>OSRI19</b>  | -0.099 | 0.132  | 0.167  | 0.079  | 0.060  | 0.063  | -0.004 | 0.011  | 0.079  | -0.087 | -0.051 | -0.036 | 0.045  |
| <b>OSRI20</b>  | -0.070 | -0.007 | 0.448  | 0.136  | 0.150  | -0.213 | -0.043 | 0.141  | -0.038 | -0.108 | -0.071 | -0.059 | 0.000  |
| <b>SOQ4a</b>   | -0.009 | 0.000  | 0.005  | -0.001 | -0.014 | -0.021 | 0.055  | 0.853  | 0.013  | 0.150  | 0.011  | -0.017 | -0.037 |
| <b>SOQ4b</b>   | 0.082  | -0.015 | -0.031 | 0.034  | 0.857  | -0.059 | -0.090 | 0.004  | -0.013 | 0.063  | -0.006 | -0.021 | -0.025 |
| <b>SOQ4c</b>   | -0.053 | 0.032  | -0.070 | 0.041  | 0.322  | 0.040  | -0.039 | 0.429  | -0.044 | 0.454  | 0.033  | 0.088  | -0.012 |
| <b>SOQ4d</b>   | -0.080 | 0.053  | -0.053 | -0.003 | 0.457  | -0.031 | 0.113  | 0.282  | 0.032  | 0.450  | 0.040  | 0.064  | 0.042  |
| <b>SOQ4e</b>   | 0.026  | 0.041  | -0.041 | 0.015  | -0.016 | 0.053  | -0.016 | 0.029  | 0.006  | 0.901  | 0.009  | -0.019 | 0.046  |
| <b>SOQ5a</b>   | 0.110  | 0.022  | -0.012 | 0.035  | -0.287 | 0.443  | 0.001  | 0.474  | -0.052 | -0.119 | 0.005  | -0.039 | -0.115 |
| <b>SOQ5b</b>   | 0.033  | 0.001  | 0.062  | -0.009 | 0.616  | 0.226  | 0.013  | -0.294 | -0.036 | -0.057 | 0.049  | -0.034 | 0.067  |
| <b>SOQ5c</b>   | 0.061  | 0.019  | -0.139 | -0.000 | -0.028 | 0.719  | -0.080 | 0.161  | -0.027 | 0.035  | -0.006 | 0.095  | -0.052 |
| <b>SOQ5d</b>   | -0.038 | 0.054  | -0.063 | -0.027 | 0.312  | 0.571  | 0.248  | -0.206 | 0.072  | 0.017  | 0.057  | 0.074  | 0.101  |
| <b>SOQ5e</b>   | 0.048  | -0.012 | -0.094 | -0.106 | -0.065 | 0.713  | 0.041  | -0.152 | 0.087  | 0.241  | -0.005 | 0.038  | 0.020  |
| <b>MSPD10k</b> | 0.005  | 0.852  | -0.038 | -0.031 | -0.034 | 0.011  | 0.009  | -0.030 | -0.041 | 0.027  | 0.038  | -0.014 | 0.003  |
| <b>MSPD10l</b> | -0.029 | 0.914  | 0.025  | -0.058 | -0.009 | -0.028 | -0.003 | 0.024  | -0.038 | 0.019  | 0.034  | -0.005 | -0.014 |

Table SF105: EFA for Prolific Non-cisgender Sample (Including Supplementary Items): 18 Factors Using Oblimin Rotation.

## 5.9. Exploratory Factor Analysis - MIQ Items - Including Supplementary Items

We conducted EFA for the full dataset comprising MIQ items to inspect different groups. To determine the optimal number of factors, we computed (a) EKC and (b) PA as factor retention methods. Both methods suggest that two factors are sufficient. Based on the factor loadings in Table SF107, Factor 1 has an eigenvalue (variance explained) of 3.20 (0.29) and Factor 2 of 2.72 (0.25).

As in Table SF106, which shows the factor loadings for n=2 factors excluding the supplementary items, the loadings of MIQ1 and MIQ3 are negative in both factors in Table SF107, which shows the factor loadings for n=2 factors including the supplementary items, indicating that they are not related to the remaining MIQ items.

Unlike Table SF106, MIQ6–7 and MIQ9–10 load onto Factor 2 in Table SF107. MIQ4–5 load onto Factor 1 together with the supplementary item MIQ13, which refers to the desire to be and dress like a man. As a result, the inclusion of the supplementary items did not alter the structure of the factor loadings.

| <b>Item</b> | <b>F1</b> | <b>F2</b> |
|-------------|-----------|-----------|
| MIQ1        | -0.348    | 0.041     |
| MIQ3        | 0.055     | -0.807    |
| MIQ4        | 0.017     | 0.762     |
| MIQ5        | 0.055     | 0.737     |
| MIQ6        | 0.718     | -0.063    |
| MIQ7        | 0.783     | -0.054    |
| MIQ9        | 0.747     | 0.034     |
| MIQ10       | 0.734     | 0.095     |

Table SF106: Factor Loadings for MIQ Items (Oblimin Rotation).

| <b>Item</b> | <b>F1</b> | <b>F2</b> |
|-------------|-----------|-----------|
| MIQ1        | 0.039     | -0.435    |
| MIQ3        | -0.711    | 0.042     |
| MIQ4        | 0.686     | -0.007    |
| MIQ5        | 0.894     | 0.034     |
| MIQ6        | -0.052    | 0.684     |
| MIQ7        | -0.056    | 0.741     |
| MIQ9        | 0.034     | 0.763     |
| MIQ10       | 0.102     | 0.734     |
| MIQ11       | 0.047     | -0.624    |
| MIQ12       | -0.807    | 0.059     |
| MIQ13       | 0.867     | 0.037     |

Table SF107: Factor Loadings for MIQ and Supplementary Items (Oblimin Rotation).

## 5.10. Exploratory Factor Analysis - SOQ Items - Including Supplementary Items

We conducted EFA for the full dataset comprising SOQ items to inspect different groups. To determine the optimal number of factors, we computed (a) EKC and (b) PA as factor retention methods. While the EKC suggests four factors as sufficient, the PA suggests three. We conducted the factor analysis (oblimin rotation) for three factors.

Based on the factor loadings in Table SF109, Factor 1 has an eigenvalue (variance explained) of 7.15 (0.29), Factor 2 of 5.91 (0.24) and Factor 3 of 4.50 (0.18).

Table SF108 shows that the loadings of SOQ1a–3a, relating to sexual relationships with men, load onto one factor. Items relating to relationships with women and non-cisgender individuals converge onto one factor, such as SOQ1b–e and SOQ2b–e load onto one factor, and SOQ3b–e load onto another factor.

| <b>Item</b> | <b>F1</b> | <b>F2</b> | <b>F3</b> |
|-------------|-----------|-----------|-----------|
| SOQ1a       | 0.338     | 0.805     | -0.083    |
| SOQ1b       | 0.764     | 0.104     | 0.098     |
| SOQ1c       | 0.447     | -0.708    | -0.090    |
| SOQ1d       | 0.775     | -0.007    | 0.107     |
| SOQ1e       | 0.634     | 0.006     | 0.274     |
| SOQ2a       | -0.003    | 0.819     | 0.183     |
| SOQ2b       | 0.110     | 0.140     | 0.754     |
| SOQ2c       | 0.063     | -0.759    | 0.280     |
| SOQ2d       | 0.096     | -0.093    | 0.827     |
| SOQ2e       | 0.039     | -0.040    | 0.895     |
| SOQ3a       | 0.433     | 0.762     | -0.105    |
| SOQ3b       | 0.869     | 0.085     | 0.026     |
| SOQ3c       | 0.574     | -0.678    | -0.151    |
| SOQ3d       | 0.864     | 0.002     | 0.038     |
| SOQ3e       | 0.755     | -0.002    | 0.190     |

Table SF108: Factor Loadings for SOQ Items (Oblimin Rotation).

Table SF109 shows that the loadings of SOQ1a–3a and SOQ4b–5b, relating to sexual relationship with men, load onto one factor as in Table SF108. Also in Table SF109, items relating to relationships with women and non-cisgender individuals converge onto one factor, such as SOQ1b–e, SOQ3b–e as well as the supplementary items SOQ4b–e. In Table SF109, SOQ2b–e load onto another factor together with the supplementary items SOQ5c–e. Thus, the inclusion of the supplementary items did not alter the structure of the factor loadings.

| <b>Item</b> | <b>F1</b> | <b>F2</b> | <b>F3</b> |
|-------------|-----------|-----------|-----------|
| SOQ1a       | 0.324     | 0.794     | -0.083    |
| SOQ1b       | 0.723     | 0.105     | 0.111     |
| SOQ1c       | 0.420     | -0.701    | -0.098    |
| SOQ1d       | 0.738     | -0.006    | 0.114     |
| SOQ1e       | 0.602     | 0.006     | 0.293     |
| SOQ2a       | 0.009     | 0.841     | 0.161     |
| SOQ2b       | 0.099     | 0.134     | 0.756     |
| SOQ2c       | 0.066     | -0.794    | 0.257     |
| SOQ2d       | 0.095     | -0.110    | 0.816     |
| SOQ2e       | 0.038     | -0.055    | 0.870     |
| SOQ3a       | 0.445     | 0.764     | -0.105    |
| SOQ3b       | 0.879     | 0.083     | 0.037     |
| SOQ3c       | 0.588     | -0.678    | -0.160    |
| SOQ3d       | 0.878     | 0.000     | 0.043     |
| SOQ3e       | 0.767     | -0.005    | 0.205     |
| SOQ4a       | 0.578     | -0.665    | -0.151    |
| SOQ4b       | 0.443     | 0.741     | -0.095    |
| SOQ4c       | 0.895     | 0.006     | 0.048     |
| SOQ4d       | 0.892     | 0.093     | 0.046     |
| SOQ4e       | 0.773     | -0.001    | 0.218     |
| SOQ5a       | 0.055     | -0.786    | 0.221     |
| SOQ5b       | 0.020     | 0.833     | 0.154     |
| SOQ5c       | 0.074     | -0.129    | 0.802     |
| SOQ5d       | 0.079     | 0.165     | 0.779     |
| SOQ5e       | 0.021     | -0.023    | 0.892     |

Table SF109: Factor Loadings for SOQ and Supplementary Items (Oblimin Rotation).

### 5.11. Exploratory Factor Analysis - TCS Items - Including Supplementary Items

We conducted EFA for the full dataset comprising TCS items to inspect different groups. To determine the optimal number of factors, we computed (a) EKC and (b) PA as factor retention methods. Both methods suggest that two factors are sufficient. Based on the factor loadings in Table SF111, Factor 1 has an eigenvalue (variance explained) of 3.87 (0.48) and Factor 2 of 1.48 (0.18). Table SF110 shows that the five TCS items load strongly on Factor 1 (TCS1-3) - “the Appearance Congruence” factor of Kozee et al. (2012), and Factor 2 (TCS4-5) - “the Gender Identity Appearance” factor of Kozee et al. (2012).

| <b>Item</b> | <b>F1</b> | <b>F2</b> |
|-------------|-----------|-----------|
| TCS1        | 0.795     | 0.017     |
| TCS2        | 0.998     | -0.055    |
| TCS3        | 0.758     | 0.128     |
| TCS4        | -0.016    | 0.991     |
| TCS5        | 0.070     | 0.700     |

Table SF110: Factor Loadings for TCS Items (Oblimin Rotation).

In Table SF111, TCS1–6, referring to satisfaction with gender identity and appearance, load onto Factor 1 and TCS8, referring to feeling as a man in terms of external representation, load onto Factor 2. TCS7,

which refers to feeling as a man in terms of external representation, does not exceed the threshold of 0.40 in any factor. Thus, the inclusion of the supplementary items converges the factor structure of Kozee et al. (2012) into one factor.

| <b>Item</b> | <b>F1</b> | <b>F2</b> |
|-------------|-----------|-----------|
| TCS1        | 0.823     | 0.064     |
| TCS2        | 0.888     | 0.029     |
| TCS3        | 0.853     | -0.075    |
| TCS4        | 0.726     | -0.078    |
| TCS5        | 0.631     | -0.032    |
| TCS6        | 0.861     | 0.048     |
| TCS7        | 0.113     | -0.742    |
| TCS8        | 0.055     | 0.953     |

Table SF111: Factor Loadings for TCS and Supplementary Items (Oblimin Rotation).

### 5.12. Exploratory Factor Analysis - OSRI Items - Including Supplementary Items

We conducted EFA for the full dataset comprising OSRI items to inspect different groups. To determine the optimal number of factors, we computed (a) EKC and (b) PA as factor retention methods. Both methods suggest that four factors are sufficient. Table SF112 shows that the items OSRI2, OSRI7, OSRI12, OSRI14, OSRI16, and OSRI18, referring to creative expression and social interaction, load onto Factor 1. OSRI1, OSRI13, and OSRI15, referring to exploratory and experimental behavior, load onto Factor 2. OSRI3, OSRI4, OSRI9 and OSRI11, referring to private and personal preferences, load onto Factor 3. OSRI5, OSRI6, OSRI8, OSRI10, and OSRI17 load onto Factor 4.

| <b>Item</b> | <b>F1</b> | <b>F2</b> | <b>F3</b> | <b>F4</b> |
|-------------|-----------|-----------|-----------|-----------|
| OSRI1       | -0.004    | 0.605     | 0.021     | -0.062    |
| OSRI2       | 0.477     | 0.183     | 0.035     | -0.210    |
| OSRI3       | -0.087    | -0.011    | 0.602     | -0.022    |
| OSRI4       | 0.174     | -0.141    | 0.340     | 0.096     |
| OSRI5       | -0.111    | 0.044     | -0.218    | 0.389     |
| OSRI6       | 0.018     | 0.281     | 0.172     | 0.311     |
| OSRI7       | 0.435     | -0.048    | 0.041     | 0.015     |
| OSRI8       | 0.041     | 0.228     | -0.045    | 0.389     |
| OSRI9       | 0.083     | 0.063     | 0.443     | 0.062     |
| OSRI10      | -0.009    | 0.142     | 0.235     | 0.454     |
| OSRI11      | 0.255     | 0.030     | 0.367     | 0.101     |
| OSRI12      | 0.460     | -0.076    | 0.187     | 0.061     |
| OSRI13      | 0.057     | 0.494     | -0.091    | 0.193     |
| OSRI14      | 0.541     | -0.007    | -0.069    | 0.036     |
| OSRI15      | -0.031    | 0.701     | 0.001     | 0.023     |
| OSRI16      | 0.597     | -0.076    | -0.148    | 0.110     |
| OSRI17      | 0.037     | 0.242     | 0.054     | 0.289     |
| OSRI18      | 0.501     | 0.081     | 0.194     | -0.199    |

Table SF112: Factor Loadings for OSRI Items (Oblimin Rotation).

As in Table SF112, the items OSRI2, OSRI7, OSRI12, OSRI14, OSRI16, and OSRI18, referring to creative

expression and social interaction, load onto Factor 1 in Table SF113. The inclusion of the supplementary items diminished the factor loadings of OSRI4, OSRI6, OSRI8, OSRI10 and OSRI17 below 0.40. Also, the supplementary item OSRI19 is cross-loading and therefore not considered in the primary loadings and the supplementary items OSRI20 did not exceed the threshold of 0.40.

| <b>Item</b> | <b>F1</b> | <b>F2</b> | <b>F3</b> | <b>F4</b> |
|-------------|-----------|-----------|-----------|-----------|
| OSRI1       | 0.000     | 0.587     | -0.001    | -0.097    |
| OSRI2       | 0.436     | 0.154     | 0.031     | -0.307    |
| OSRI3       | -0.069    | -0.011    | 0.537     | -0.086    |
| OSRI4       | 0.175     | -0.151    | 0.368     | 0.069     |
| OSRI5       | -0.101    | 0.110     | -0.124    | 0.412     |
| OSRI6       | 0.008     | 0.352     | 0.243     | 0.213     |
| OSRI7       | 0.412     | -0.068    | 0.089     | -0.017    |
| OSRI8       | 0.018     | 0.305     | 0.064     | 0.312     |
| OSRI9       | 0.032     | 0.070     | 0.488     | -0.051    |
| OSRI10      | -0.035    | 0.230     | 0.349     | 0.341     |
| OSRI11      | 0.242     | 0.024     | 0.408     | 0.035     |
| OSRI12      | 0.441     | -0.090    | 0.240     | 0.008     |
| OSRI13      | 0.033     | 0.561     | -0.036    | 0.086     |
| OSRI14      | 0.582     | -0.041    | -0.038    | 0.057     |
| OSRI15      | -0.032    | 0.705     | -0.002    | -0.036    |
| OSRI16      | 0.547     | -0.065    | -0.044    | 0.050     |
| OSRI17      | 0.053     | 0.289     | 0.114     | 0.265     |
| OSRI18      | 0.504     | 0.051     | 0.165     | -0.285    |
| OSRI19      | 0.460     | 0.173     | -0.173    | 0.300     |
| OSRI20      | 0.090     | -0.086    | -0.241    | 0.370     |

Table SF113: Factor Loadings for OSRI and Supplementary Items (Oblimin Rotation).

### 5.13. Exploratory Factor Analysis - MSPD Items - Including Supplementary Items

We conducted EFA for the full dataset comprising MSPD items to inspect different groups. To determine the optimal number of factors, we computed (a) EKC and (b) PA as factor retention methods. While the EKC suggests eight factors as sufficient, the PA suggests six. Based on the factor loadings in Table SF115, Factor 1 has an eigenvalue (variance explained) of 10.42 (0.19), Factor 2 of 6.51 (0.12), Factor 3 of 4.52 (0.08), Factor 4 of 4.10 (0.07), Factor 5 of 3.77 (0.07) and Factor 6 of 1.72 (0.03). The loading of Table SF114 shows that the BID and SID factors are combined into a single factor. The BGD and SGD items are organized into the following factors: one factor for items measuring subtle and group discrimination against men, another for items measuring subtle and group discrimination against women, two factors for items measuring subtle group discrimination against non-cisgender individuals, and one factor for blatant and subtle group discrimination against non-cisgender individuals, see Table SF54.

| <b>Item</b> | <b>F1</b> | <b>F2</b> | <b>F3</b> | <b>F4</b> | <b>F5</b> | <b>F6</b> |
|-------------|-----------|-----------|-----------|-----------|-----------|-----------|
| MSPD1a      | -0.062    | 0.043     | 0.715     | -0.015    | -0.030    | 0.127     |
| MSPD1b      | -0.113    | 0.054     | -0.018    | 0.689     | -0.031    | 0.214     |
| MSPD1c      | 0.220     | 0.058     | -0.061    | 0.203     | 0.163     | 0.583     |
| MSPD1d      | 0.250     | 0.018     | 0.003     | 0.108     | 0.160     | 0.582     |
| MSPD1e      | 0.345     | 0.058     | 0.037     | 0.097     | 0.100     | 0.503     |
| MSPD2a      | -0.031    | -0.005    | 0.789     | -0.085    | 0.028     | 0.078     |

|         |        |        |        |        |        |        |
|---------|--------|--------|--------|--------|--------|--------|
| MSPD2b  | 0.049  | 0.032  | -0.077 | 0.774  | -0.007 | 0.137  |
| MSPD2c  | 0.630  | 0.030  | -0.085 | 0.148  | -0.020 | 0.270  |
| MSPD2d  | 0.646  | 0.025  | -0.040 | 0.097  | -0.020 | 0.307  |
| MSPD2e  | 0.695  | 0.043  | -0.019 | 0.051  | -0.022 | 0.254  |
| MSPD3a  | -0.037 | -0.023 | 0.791  | -0.019 | -0.041 | 0.015  |
| MSPD3b  | 0.209  | 0.007  | -0.025 | 0.672  | -0.025 | 0.078  |
| MSPD3c  | 0.719  | -0.016 | -0.067 | 0.123  | 0.031  | 0.136  |
| MSPD3d  | 0.771  | 0.008  | -0.012 | 0.002  | 0.030  | 0.138  |
| MSPD3e  | 0.801  | 0.028  | -0.003 | -0.021 | 0.028  | 0.096  |
| MSPD4a  | 0.050  | -0.032 | 0.758  | 0.010  | -0.056 | -0.024 |
| MSPD4b  | 0.228  | 0.106  | 0.022  | 0.643  | -0.044 | -0.022 |
| MSPD4c  | 0.732  | 0.061  | -0.020 | 0.160  | -0.012 | 0.038  |
| MSPD4d  | 0.765  | 0.058  | -0.003 | 0.118  | -0.016 | 0.050  |
| MSPD4e  | 0.797  | 0.069  | -0.003 | 0.073  | -0.051 | 0.028  |
| MSPD5a  | 0.105  | -0.054 | 0.781  | 0.061  | -0.010 | 0.024  |
| MSPD5b  | 0.074  | 0.084  | 0.137  | 0.657  | -0.051 | 0.004  |
| MSPD5c  | 0.677  | 0.017  | 0.041  | 0.035  | 0.113  | 0.189  |
| MSPD5d  | 0.711  | 0.031  | 0.063  | -0.024 | 0.111  | 0.173  |
| MSPD5e  | 0.779  | 0.031  | 0.083  | -0.039 | 0.067  | 0.115  |
| MSPD6a  | 0.007  | 0.002  | 0.733  | 0.005  | -0.037 | -0.162 |
| MSPD6b  | 0.260  | 0.042  | 0.048  | 0.677  | -0.019 | -0.241 |
| MSPD6c  | 0.855  | 0.030  | -0.056 | 0.111  | 0.047  | -0.217 |
| MSPD6d  | 0.891  | 0.034  | -0.019 | 0.033  | 0.056  | -0.214 |
| MSPD6e  | 0.888  | 0.055  | 0.004  | 0.014  | 0.042  | -0.225 |
| MSPD7a  | 0.070  | 0.116  | 0.573  | 0.047  | 0.014  | -0.002 |
| MSPD7b  | -0.064 | 0.002  | 0.058  | 0.628  | 0.126  | -0.036 |
| MSPD7c  | 0.450  | 0.038  | -0.050 | 0.116  | 0.317  | 0.139  |
| MSPD7d  | 0.507  | -0.002 | 0.008  | 0.067  | 0.309  | 0.127  |
| MSPD7e  | 0.521  | 0.018  | 0.012  | 0.044  | 0.291  | 0.090  |
| MSPD8a  | -0.068 | 0.104  | 0.565  | 0.130  | 0.132  | -0.030 |
| MSPD8b  | -0.202 | 0.083  | 0.112  | 0.571  | 0.422  | -0.089 |
| MSPD8c  | -0.034 | 0.022  | -0.030 | 0.037  | 0.905  | 0.003  |
| MSPD8d  | 0.004  | 0.001  | 0.006  | 0.009  | 0.917  | -0.003 |
| MSPD8e  | 0.061  | 0.006  | 0.008  | 0.012  | 0.854  | -0.006 |
| MSPD9a  | -0.030 | 0.092  | 0.540  | 0.060  | 0.093  | -0.066 |
| MSPD9b  | 0.007  | 0.111  | 0.040  | 0.548  | 0.218  | -0.035 |
| MSPD9c  | 0.367  | 0.045  | -0.059 | 0.002  | 0.499  | 0.108  |
| MSPD9d  | 0.400  | 0.054  | -0.020 | -0.057 | 0.496  | 0.103  |
| MSPD9e  | 0.446  | 0.082  | -0.025 | -0.063 | 0.433  | 0.097  |
| MSPD10a | 0.018  | 0.822  | 0.037  | 0.005  | 0.020  | 0.029  |
| MSPD10b | -0.018 | 0.853  | 0.011  | -0.009 | 0.033  | 0.013  |
| MSPD10c | -0.022 | 0.797  | -0.020 | -0.043 | -0.012 | -0.024 |
| MSPD10d | -0.004 | 0.819  | -0.059 | 0.034  | -0.081 | -0.034 |
| MSPD10e | 0.020  | 0.714  | -0.018 | -0.001 | -0.044 | -0.036 |
| MSPD10f | -0.006 | 0.873  | 0.060  | -0.072 | -0.019 | 0.037  |
| MSPD10g | -0.002 | 0.749  | -0.028 | 0.005  | -0.126 | -0.060 |
| MSPD10h | 0.017  | 0.788  | -0.002 | 0.031  | 0.053  | -0.014 |
| MSPD10i | 0.012  | 0.818  | -0.024 | 0.032  | 0.042  | 0.016  |

|         |        |       |       |       |       |       |
|---------|--------|-------|-------|-------|-------|-------|
| MSPD10j | -0.039 | 0.742 | 0.041 | 0.018 | 0.055 | 0.024 |
|---------|--------|-------|-------|-------|-------|-------|

Table SF114: Factor Loadings for MSPD Items (Oblimin Rotation).

Table SF115 shows that the inclusion of the supplementary items does not alter the structure of the factor loadings compared to Table SF114. Also in Table SF115, the items MSPD2c–e, MSPD3c–e, MSPD4c–e, MSPD5c–e, MSPD6c–e and MSPD7e load onto Factor 1. The items MSPD10a–j load together with the supplementary items MSPD10k–l onto Factor 2. Also MSPD1a–9a load onto Factor 3, MSPD1b–7b, and MSPD9b onto Factor 4. MSPD8c–e load onto Factor 5 without the MSPD9c–e items as they are cross-loading. And the MSPD1c–e items load onto Factor 6.

| Item   | F1     | F2     | F3     | F4     | F5     | F6     |
|--------|--------|--------|--------|--------|--------|--------|
| MSPD1a | -0.059 | 0.043  | 0.716  | -0.015 | -0.029 | 0.126  |
| MSPD1b | -0.110 | 0.052  | -0.018 | 0.692  | -0.031 | 0.212  |
| MSPD1c | 0.245  | 0.055  | -0.059 | 0.204  | 0.161  | 0.569  |
| MSPD1d | 0.276  | 0.012  | 0.006  | 0.110  | 0.159  | 0.567  |
| MSPD1e | 0.366  | 0.058  | 0.039  | 0.098  | 0.098  | 0.492  |
| MSPD2a | -0.030 | -0.003 | 0.789  | -0.087 | 0.028  | 0.079  |
| MSPD2b | 0.048  | 0.031  | -0.079 | 0.778  | -0.006 | 0.136  |
| MSPD2c | 0.638  | 0.035  | -0.087 | 0.147  | -0.020 | 0.264  |
| MSPD2d | 0.655  | 0.030  | -0.042 | 0.095  | -0.021 | 0.301  |
| MSPD2e | 0.705  | 0.045  | -0.019 | 0.051  | -0.023 | 0.247  |
| MSPD3a | -0.037 | -0.026 | 0.791  | -0.019 | -0.040 | 0.016  |
| MSPD3b | 0.210  | 0.002  | -0.025 | 0.676  | -0.024 | 0.074  |
| MSPD3c | 0.723  | -0.013 | -0.068 | 0.122  | 0.031  | 0.132  |
| MSPD3d | 0.776  | 0.010  | -0.013 | 0.002  | 0.029  | 0.134  |
| MSPD3e | 0.807  | 0.027  | -0.004 | -0.020 | 0.027  | 0.091  |
| MSPD4a | 0.047  | -0.033 | 0.758  | 0.010  | -0.055 | -0.022 |
| MSPD4b | 0.227  | 0.097  | 0.023  | 0.651  | -0.044 | -0.026 |
| MSPD4c | 0.733  | 0.061  | -0.020 | 0.162  | -0.013 | 0.034  |
| MSPD4d | 0.767  | 0.058  | -0.003 | 0.119  | -0.016 | 0.045  |
| MSPD4e | 0.799  | 0.068  | -0.003 | 0.075  | -0.052 | 0.023  |
| MSPD5a | 0.102  | -0.049 | 0.778  | 0.057  | -0.008 | 0.026  |
| MSPD5b | 0.070  | 0.082  | 0.136  | 0.660  | -0.050 | 0.005  |
| MSPD5c | 0.686  | 0.020  | 0.040  | 0.035  | 0.112  | 0.181  |
| MSPD5d | 0.719  | 0.035  | 0.063  | -0.025 | 0.110  | 0.165  |
| MSPD5e | 0.786  | 0.032  | 0.083  | -0.039 | 0.065  | 0.108  |
| MSPD6a | 0.001  | -0.004 | 0.734  | 0.007  | -0.036 | -0.160 |
| MSPD6b | 0.250  | 0.036  | 0.047  | 0.682  | -0.019 | -0.242 |
| MSPD6c | 0.851  | 0.029  | -0.058 | 0.112  | 0.046  | -0.222 |
| MSPD6d | 0.888  | 0.033  | -0.020 | 0.035  | 0.054  | -0.219 |
| MSPD6e | 0.884  | 0.054  | 0.003  | 0.015  | 0.041  | -0.230 |
| MSPD7a | 0.072  | 0.113  | 0.575  | 0.048  | 0.014  | -0.004 |
| MSPD7b | -0.070 | 0.003  | 0.056  | 0.630  | 0.127  | -0.033 |
| MSPD7c | 0.460  | 0.036  | -0.049 | 0.118  | 0.315  | 0.131  |
| MSPD7d | 0.516  | -0.003 | 0.008  | 0.068  | 0.307  | 0.119  |
| MSPD7e | 0.529  | 0.017  | 0.012  | 0.046  | 0.289  | 0.083  |
| MSPD8a | -0.068 | 0.101  | 0.566  | 0.132  | 0.132  | -0.029 |
| MSPD8b | -0.210 | 0.088  | 0.110  | 0.572  | 0.421  | -0.084 |

|         |        |       |        |        |        |        |
|---------|--------|-------|--------|--------|--------|--------|
| MSPD8c  | -0.030 | 0.024 | -0.030 | 0.038  | 0.902  | 0.004  |
| MSPD8d  | 0.008  | 0.004 | 0.007  | 0.010  | 0.914  | -0.002 |
| MSPD8e  | 0.063  | 0.013 | 0.008  | 0.011  | 0.852  | -0.004 |
| MSPD9a  | -0.028 | 0.086 | 0.542  | 0.062  | 0.092  | -0.070 |
| MSPD9b  | 0.008  | 0.106 | 0.041  | 0.554  | 0.217  | -0.041 |
| MSPD9c  | 0.384  | 0.034 | -0.055 | 0.007  | 0.495  | 0.093  |
| MSPD9d  | 0.417  | 0.043 | -0.016 | -0.052 | 0.493  | 0.087  |
| MSPD9e  | 0.463  | 0.072 | -0.021 | -0.058 | 0.429  | 0.082  |
| MSPD10a | 0.035  | 0.803 | 0.053  | 0.019  | 0.012  | 0.016  |
| MSPD10b | 0.001  | 0.832 | 0.028  | 0.007  | 0.024  | -0.003 |
| MSPD10c | 0.000  | 0.762 | -0.000 | -0.021 | -0.020 | -0.044 |
| MSPD10d | 0.017  | 0.786 | -0.040 | 0.055  | -0.089 | -0.054 |
| MSPD10e | 0.042  | 0.675 | 0.001  | 0.021  | -0.051 | -0.056 |
| MSPD10f | 0.009  | 0.863 | 0.075  | -0.061 | -0.028 | 0.026  |
| MSPD10g | 0.015  | 0.717 | -0.010 | 0.025  | -0.132 | -0.077 |
| MSPD10h | 0.022  | 0.795 | 0.007  | 0.035  | 0.046  | -0.017 |
| MSPD10i | 0.016  | 0.831 | -0.016 | 0.034  | 0.034  | 0.014  |
| MSPD10j | -0.043 | 0.775 | 0.045  | 0.011  | 0.049  | 0.030  |
| MSPD10k | -0.040 | 0.907 | -0.053 | -0.020 | 0.020  | 0.025  |
| MSPD10l | -0.032 | 0.938 | -0.043 | -0.054 | 0.011  | 0.032  |

Table SF115: Factor Loadings for MSPD and Supplementary Items (Oblimin Rotation).

### 5.14. Principal Component Analysis - All Items

We conducted a PCA to check whether we can reduce the number of dimensions in our data. We find that we cannot identify clear patterns using PCA and present the results in SF116.

| Item  | PC1    | PC2    | PC3    | PC4    | PC5    | PC6    | PC7   |
|-------|--------|--------|--------|--------|--------|--------|-------|
| MIQ1  | -0.221 | -0.160 | 0.287  | -0.074 | 0.237  | 0.337  | 0.224 |
| MIQ3  | 0.013  | -0.532 | -0.305 | 0.089  | 0.079  | 0.035  | 0.095 |
| MIQ4  | 0.045  | 0.492  | 0.337  | -0.063 | -0.014 | 0.060  | 0.067 |
| MIQ5  | 0.018  | 0.726  | 0.298  | -0.062 | -0.100 | 0.060  | 0.043 |
| MIQ6  | 0.338  | 0.165  | -0.306 | 0.075  | -0.366 | -0.091 | 0.139 |
| MIQ7  | 0.438  | 0.142  | -0.299 | 0.026  | -0.428 | -0.066 | 0.140 |
| MIQ9  | 0.506  | 0.213  | -0.329 | -0.031 | -0.295 | -0.152 | 0.049 |
| MIQ10 | 0.494  | 0.276  | -0.320 | -0.038 | -0.254 | -0.101 | 0.016 |
| TCS1  | -0.451 | -0.177 | 0.416  | 0.095  | 0.385  | 0.237  | 0.154 |
| TCS2  | -0.494 | -0.190 | 0.403  | 0.058  | 0.395  | 0.305  | 0.169 |
| TCS3  | -0.481 | -0.249 | 0.398  | 0.036  | 0.425  | 0.245  | 0.136 |
| TCS4  | -0.297 | -0.199 | 0.347  | -0.037 | 0.407  | 0.356  | 0.248 |
| TCS5  | -0.158 | -0.188 | 0.376  | -0.061 | 0.381  | 0.382  | 0.181 |
| OSRI1 | 0.087  | 0.232  | 0.025  | 0.188  | -0.007 | -0.004 | 0.250 |
| OSRI2 | 0.207  | -0.131 | -0.115 | 0.102  | 0.008  | 0.168  | 0.380 |
| OSRI3 | 0.379  | 0.040  | -0.098 | -0.046 | -0.020 | -0.070 | 0.093 |
| OSRI4 | 0.173  | -0.043 | -0.072 | 0.095  | 0.036  | 0.034  | 0.161 |
| OSRI5 | -0.312 | 0.220  | 0.090  | 0.025  | 0.086  | -0.015 | 0.022 |
| OSRI6 | 0.107  | 0.308  | 0.047  | 0.175  | -0.008 | 0.030  | 0.311 |
| OSRI7 | 0.110  | -0.271 | -0.128 | 0.130  | 0.002  | 0.157  | 0.293 |

|        |        |        |        |        |        |        |        |
|--------|--------|--------|--------|--------|--------|--------|--------|
| OSRI8  | -0.115 | 0.262  | 0.064  | 0.209  | -0.004 | 0.069  | 0.194  |
| OSRI9  | 0.293  | -0.014 | -0.164 | 0.112  | -0.047 | -0.006 | 0.180  |
| OSRI10 | 0.055  | 0.227  | -0.079 | 0.126  | 0.055  | -0.108 | 0.244  |
| OSRI11 | 0.249  | 0.009  | -0.208 | 0.113  | 0.061  | 0.024  | 0.318  |
| OSRI12 | 0.208  | -0.229 | -0.118 | 0.098  | -0.020 | 0.083  | 0.367  |
| OSRI13 | 0.041  | 0.372  | 0.148  | 0.139  | -0.024 | 0.091  | 0.313  |
| OSRI14 | 0.048  | -0.161 | -0.042 | 0.186  | 0.089  | 0.139  | 0.385  |
| OSRI15 | 0.056  | 0.359  | 0.060  | 0.218  | 0.001  | 0.015  | 0.271  |
| OSRI16 | 0.092  | -0.278 | -0.126 | 0.173  | 0.055  | 0.133  | 0.352  |
| OSRI17 | -0.030 | 0.260  | 0.073  | 0.157  | 0.054  | 0.006  | 0.250  |
| OSRI18 | 0.305  | -0.124 | -0.170 | 0.079  | -0.042 | 0.124  | 0.398  |
| SOQ1a  | 0.108  | -0.519 | -0.420 | -0.192 | 0.375  | -0.155 | 0.086  |
| SOQ1b  | 0.257  | 0.287  | -0.414 | -0.396 | 0.390  | 0.019  | 0.019  |
| SOQ1c  | -0.026 | 0.697  | 0.163  | -0.193 | 0.165  | 0.195  | -0.066 |
| SOQ1d  | 0.250  | 0.335  | -0.424 | -0.405 | 0.348  | 0.070  | -0.029 |
| SOQ1e  | 0.366  | 0.293  | -0.394 | -0.393 | 0.207  | 0.090  | 0.042  |
| SOQ2a  | 0.160  | -0.640 | -0.407 | -0.037 | 0.171  | -0.117 | 0.189  |
| SOQ2b  | 0.501  | 0.163  | -0.363 | -0.122 | -0.101 | 0.091  | 0.348  |
| SOQ2c  | 0.115  | 0.721  | 0.237  | -0.003 | -0.117 | 0.215  | 0.037  |
| SOQ2d  | 0.529  | 0.286  | -0.316 | -0.152 | -0.199 | 0.134  | 0.247  |
| SOQ2e  | 0.586  | 0.216  | -0.307 | -0.143 | -0.250 | 0.137  | 0.273  |
| SOQ3a  | 0.160  | -0.467 | -0.445 | -0.253 | 0.427  | -0.178 | 0.023  |
| SOQ3b  | 0.307  | 0.304  | -0.425 | -0.445 | 0.482  | 0.004  | -0.072 |
| SOQ3c  | 0.007  | 0.714  | 0.098  | -0.254 | 0.278  | 0.184  | -0.115 |
| SOQ3d  | 0.291  | 0.347  | -0.433 | -0.445 | 0.443  | 0.026  | -0.108 |
| SOQ3e  | 0.378  | 0.328  | -0.431 | -0.434 | 0.329  | 0.069  | -0.043 |
| MSPD1a | 0.013  | 0.364  | -0.006 | 0.439  | 0.286  | -0.359 | 0.063  |
| MSPD1b | 0.549  | 0.005  | -0.037 | 0.091  | -0.034 | -0.130 | 0.153  |
| MSPD1c | 0.714  | -0.098 | 0.301  | -0.142 | 0.001  | -0.060 | -0.000 |
| MSPD1d | 0.625  | -0.113 | 0.351  | -0.121 | 0.042  | -0.100 | -0.025 |
| MSPD1e | 0.677  | -0.068 | 0.294  | -0.100 | 0.029  | -0.077 | 0.022  |
| MSPD2a | -0.028 | 0.353  | -0.003 | 0.418  | 0.345  | -0.402 | 0.032  |
| MSPD2b | 0.696  | -0.060 | 0.070  | 0.054  | -0.012 | -0.077 | 0.098  |
| MSPD2c | 0.781  | -0.135 | 0.261  | -0.190 | -0.048 | -0.029 | -0.001 |
| MSPD2d | 0.758  | -0.147 | 0.296  | -0.171 | -0.019 | -0.059 | -0.044 |
| MSPD2e | 0.764  | -0.126 | 0.278  | -0.165 | -0.013 | -0.031 | -0.012 |
| MSPD3a | -0.077 | 0.336  | -0.001 | 0.468  | 0.334  | -0.375 | 0.066  |
| MSPD3b | 0.684  | -0.078 | 0.170  | 0.066  | 0.056  | -0.040 | 0.091  |
| MSPD3c | 0.776  | -0.126 | 0.317  | -0.176 | -0.043 | -0.013 | 0.038  |
| MSPD3d | 0.741  | -0.128 | 0.338  | -0.144 | -0.024 | -0.022 | 0.003  |
| MSPD3e | 0.750  | -0.133 | 0.312  | -0.141 | -0.004 | -0.009 | 0.022  |
| MSPD4a | -0.006 | 0.332  | 0.003  | 0.433  | 0.338  | -0.371 | 0.084  |
| MSPD4b | 0.724  | -0.045 | 0.033  | 0.131  | 0.009  | -0.077 | 0.084  |
| MSPD4c | 0.806  | -0.117 | 0.237  | -0.095 | -0.028 | -0.035 | -0.008 |
| MSPD4d | 0.802  | -0.117 | 0.257  | -0.088 | -0.037 | -0.047 | -0.014 |
| MSPD4e | 0.783  | -0.110 | 0.228  | -0.102 | -0.044 | -0.019 | 0.007  |
| MSPD5a | 0.109  | 0.334  | 0.086  | 0.434  | 0.315  | -0.420 | 0.050  |
| MSPD5b | 0.585  | 0.037  | 0.018  | 0.223  | 0.102  | -0.115 | 0.078  |
| MSPD5c | 0.763  | -0.081 | 0.351  | -0.120 | 0.034  | -0.055 | -0.041 |

|         |        |        |        |        |        |        |        |
|---------|--------|--------|--------|--------|--------|--------|--------|
| MSPD5d  | 0.742  | -0.084 | 0.372  | -0.100 | 0.051  | -0.048 | -0.074 |
| MSPD5e  | 0.746  | -0.076 | 0.344  | -0.097 | 0.062  | -0.030 | -0.010 |
| MSPD6a  | -0.068 | 0.336  | -0.068 | 0.461  | 0.332  | -0.354 | 0.037  |
| MSPD6b  | 0.633  | -0.041 | 0.066  | 0.185  | 0.066  | -0.078 | 0.056  |
| MSPD6c  | 0.775  | -0.146 | 0.254  | -0.098 | -0.011 | 0.020  | 0.004  |
| MSPD6d  | 0.753  | -0.136 | 0.283  | -0.087 | 0.007  | 0.017  | -0.021 |
| MSPD6e  | 0.748  | -0.111 | 0.244  | -0.078 | 0.023  | 0.024  | 0.013  |
| MSPD7a  | 0.205  | 0.283  | -0.019 | 0.380  | 0.282  | -0.249 | 0.053  |
| MSPD7b  | 0.479  | 0.006  | 0.041  | 0.172  | 0.049  | -0.139 | 0.095  |
| MSPD7c  | 0.755  | -0.090 | 0.293  | -0.123 | 0.018  | -0.055 | -0.009 |
| MSPD7d  | 0.713  | -0.121 | 0.352  | -0.098 | 0.066  | -0.081 | -0.017 |
| MSPD7e  | 0.707  | -0.095 | 0.308  | -0.104 | 0.067  | -0.072 | -0.015 |
| MSPD8a  | 0.182  | 0.241  | -0.001 | 0.453  | 0.291  | -0.280 | 0.056  |
| MSPD8b  | 0.516  | 0.011  | 0.072  | 0.274  | 0.155  | -0.129 | 0.067  |
| MSPD8c  | 0.549  | -0.067 | 0.297  | -0.040 | 0.150  | -0.084 | -0.061 |
| MSPD8d  | 0.543  | -0.076 | 0.334  | -0.028 | 0.180  | -0.094 | -0.050 |
| MSPD8e  | 0.569  | -0.084 | 0.304  | -0.040 | 0.163  | -0.098 | -0.045 |
| MSPD9a  | 0.097  | 0.159  | 0.003  | 0.426  | 0.358  | -0.242 | 0.009  |
| MSPD9b  | 0.603  | -0.016 | 0.081  | 0.169  | 0.134  | -0.046 | 0.025  |
| MSPD9c  | 0.682  | -0.109 | 0.361  | -0.121 | 0.073  | -0.002 | -0.063 |
| MSPD9d  | 0.660  | -0.119 | 0.383  | -0.095 | 0.105  | -0.003 | -0.083 |
| MSPD9e  | 0.683  | -0.119 | 0.341  | -0.102 | 0.101  | 0.021  | -0.053 |
| MSPD10a | 0.601  | 0.011  | -0.194 | 0.481  | 0.064  | 0.234  | -0.182 |
| MSPD10b | 0.565  | -0.064 | -0.199 | 0.508  | 0.109  | 0.268  | -0.198 |
| MSPD10c | 0.464  | -0.061 | -0.244 | 0.441  | 0.116  | 0.280  | -0.227 |
| MSPD10d | 0.505  | -0.074 | -0.259 | 0.451  | 0.078  | 0.312  | -0.164 |
| MSPD10e | 0.466  | 0.005  | -0.225 | 0.391  | 0.070  | 0.271  | -0.140 |
| MSPD10f | 0.546  | 0.082  | -0.236 | 0.507  | 0.042  | 0.257  | -0.186 |
| MSPD10g | 0.406  | -0.022 | -0.272 | 0.429  | 0.083  | 0.298  | -0.175 |
| MSPD10h | 0.620  | 0.046  | -0.230 | 0.428  | 0.029  | 0.235  | -0.183 |
| MSPD10i | 0.634  | 0.014  | -0.222 | 0.433  | 0.042  | 0.272  | -0.182 |
| MSPD10j | 0.551  | 0.148  | -0.195 | 0.442  | 0.018  | 0.246  | -0.184 |
| MIQ11   | -0.318 | -0.177 | 0.353  | -0.051 | 0.373  | 0.311  | 0.106  |
| MIQ12   | 0.112  | -0.680 | -0.329 | 0.029  | 0.031  | 0.032  | -0.036 |
| MIQ13   | 0.013  | 0.712  | 0.301  | -0.048 | -0.078 | 0.061  | 0.084  |
| TCS6    | -0.454 | -0.204 | 0.431  | 0.085  | 0.413  | 0.240  | 0.139  |
| TCS7    | -0.015 | -0.723 | -0.308 | 0.079  | 0.118  | -0.033 | 0.010  |
| TCS8    | -0.123 | 0.703  | 0.347  | 0.017  | 0.007  | -0.012 | 0.103  |
| OSRI19  | -0.062 | 0.076  | 0.076  | 0.141  | 0.088  | 0.119  | 0.383  |
| OSRI20  | -0.473 | -0.144 | 0.304  | 0.099  | 0.390  | 0.060  | 0.037  |
| SOQ4a   | 0.012  | 0.691  | 0.089  | -0.255 | 0.273  | 0.199  | -0.120 |
| SOQ4b   | 0.156  | -0.439 | -0.452 | -0.238 | 0.427  | -0.179 | 0.040  |
| SOQ4c   | 0.295  | 0.343  | -0.452 | -0.448 | 0.450  | 0.044  | -0.093 |
| SOQ4d   | 0.314  | 0.303  | -0.445 | -0.446 | 0.483  | 0.013  | -0.065 |
| SOQ4e   | 0.387  | 0.329  | -0.451 | -0.428 | 0.320  | 0.072  | -0.038 |
| SOQ5a   | 0.106  | 0.689  | 0.269  | -0.014 | -0.118 | 0.232  | 0.025  |
| SOQ5b   | 0.139  | -0.625 | -0.406 | -0.077 | 0.158  | -0.134 | 0.179  |
| SOQ5c   | 0.534  | 0.274  | -0.297 | -0.168 | -0.250 | 0.123  | 0.211  |
| SOQ5d   | 0.532  | 0.132  | -0.361 | -0.140 | -0.139 | 0.050  | 0.333  |

|         |       |       |        |        |        |       |        |
|---------|-------|-------|--------|--------|--------|-------|--------|
| SOQ5e   | 0.581 | 0.203 | -0.322 | -0.177 | -0.294 | 0.115 | 0.270  |
| MSPD10k | 0.596 | 0.028 | -0.277 | 0.446  | 0.013  | 0.312 | -0.200 |
| MSPD10l | 0.587 | 0.024 | -0.260 | 0.469  | 0.036  | 0.332 | -0.219 |

Table SF116: PCA Loadings of 7 Components Including Supplementary Items.

## 6. MGSI Robustness Tests

In section 4.2, we conducted an EFA on all the items that were drawn from the five scales. The purpose of this combined EFA was to explore the underlying factor structure across all items collectively, and thus validate the MGSI. To verify the robustness of our findings, we performed additional EFAs separately for each of the five scales. This allowed us to examine whether the factor structures identified within each individual scale aligned with the structure we found in the combined EFA.

For the MIQ scale, we selected a two-factor solution, as the first two eigenvalues were greater than 1, see Table SF117. As shown in bold in Table SF118, Factor 1 comprises MIQ4, MIQ5 and MIQ13, and Factor 2 comprises MIQ6, MIQ7, MIQ9 and MIQ10. The items of Factor 1 collectively assess a dimension of masculine gender identity and expression, and Factor 2 relates to gender fluidity and incongruence. However, we also examined a three-factor solution, since the third eigenvalue was still greater than 1, see Table SF117. The key difference was that the items MIQ6 and MIQ7 would load on Factor 2, and MIQ9 and MIQ10 would form an additional third factor. Thus, the original second factor would split into two. Given the interpretability and parsimony, we decided to retain the two-factor model.

Table SF117: Eigenvalues, Explained Variance, and Cumulative Variance for MIQ Items.

| <b>Factor</b> | <b>Eigenvalue</b> | <b>Variance Explained</b> | <b>Cumulative Variance</b> |
|---------------|-------------------|---------------------------|----------------------------|
| 1             | 3.59              | 32.68                     | 32.68                      |
| 2             | 3.16              | 28.70                     | 61.38                      |
| 3             | 1.12              | 10.18                     | 71.56                      |
| 4             | 0.87              | 7.91                      | 79.47                      |
| ...           | ...               | ...                       | ...                        |
| 11            | 0.15              | 1.34                      | 100.00                     |

For the TCS scale, we chose a one-factor solution, as the first factor already explained the majority of the variance, see Table SF119. As shown in bold in Table SF120, the factor measures gender congruence and well-being — the degree to which a person feels alignment, satisfaction, and acceptance with their gender identity and its expression. Still, we checked a two-factor solution since the second eigenvalue also exceeded 1. In this model, TCS1–TCS6 would load on Factor 1, while TCS7 would load on a separate second factor. However, since only one item would define the second factor, we opted for the one-factor solution.

For the OSRI scale, we selected a two-factor solution, as the first two factors accounted for most of the explained variance, see Table SF121. As shown in bold in Table SF122, Factor 1 comprises OSRI2, OSRI7, OSRI11, OSRI12, OSRI14, OSRI16 and OSRI18, which according to De Roover and Vermunt (2019) are measuring masculinity, and Factor 2 comprises OSRI2, OSRI7, OSRI11, OSRI12, OSRI16 and OSRI18, all relating to femininity. We also tested a three-factor solution, since the third eigenvalue is greater than 1, see Table SF121. In this model, the first two factors remained unchanged, and a third factor emerged, comprising OSRI3 and OSRI9. However, since this third factor would include only two items and the first two eigenvalues were substantially higher, we ultimately retained the two-factor model.

Table SF118: Factor Loadings for MIQ Items on Two Factors.

| <b>Item</b> | <b>F1</b>   | <b>F2</b>   |
|-------------|-------------|-------------|
| MIQ1        | 0.04        | -0.39       |
| MIQ3        | -0.67       | 0.05        |
| MIQ4        | <b>0.64</b> | 0.01        |
| MIQ5        | <b>0.92</b> | 0.02        |
| MIQ6        | -0.03       | <b>0.59</b> |
| MIQ7        | -0.05       | <b>0.65</b> |
| MIQ9        | -0.00       | <b>0.85</b> |
| MIQ10       | 0.06        | <b>0.83</b> |
| MIQ11       | 0.07        | -0.58       |
| MIQ12       | -0.79       | 0.05        |
| MIQ13       | <b>0.90</b> | 0.03        |

Table SF119: Eigenvalues, Explained Variance, and Cumulative Variance for TCS Items.

| <b>Factor</b> | <b>Eigenvalue</b> | <b>Variance Explained</b> | <b>Cumulative Variance</b> |
|---------------|-------------------|---------------------------|----------------------------|
| 1             | 4.20              | 52.51                     | 52.51                      |
| 2             | 1.72              | 21.48                     | 73.99                      |
| 3             | 0.85              | 10.58                     | 84.57                      |
| ...           | ...               | ...                       | ...                        |
| 8             | 0.16              | 2.04                      | 100.00                     |

Table SF122: Factor Loadings for OSRI Items on Two Factors.

| <b>Item</b> | <b>F1</b>   | <b>F2</b>   |
|-------------|-------------|-------------|
| OSRI1       | <b>0.49</b> | 0.03        |
| OSRI2       | 0.01        | <b>0.51</b> |
| OSRI3       | 0.07        | 0.26        |
| OSRI4       | -0.00       | 0.34        |
| OSRI5       | 0.30        | -0.31       |
| OSRI6       | <b>0.52</b> | 0.07        |
| OSRI7       | -0.02       | <b>0.41</b> |
| OSRI8       | <b>0.49</b> | -0.07       |
| OSRI9       | 0.16        | 0.31        |
| OSRI10      | <b>0.49</b> | 0.04        |
| OSRI11      | 0.16        | <b>0.42</b> |
| OSRI12      | 0.01        | <b>0.52</b> |
| OSRI13      | <b>0.57</b> | -0.02       |
| OSRI14      | 0.03        | <b>0.45</b> |
| OSRI15      | <b>0.62</b> | -0.01       |
| OSRI16      | 0.00        | <b>0.42</b> |
| OSRI17      | <b>0.46</b> | 0.01        |
| OSRI18      | -0.04       | <b>0.64</b> |
| OSRI19      | 0.30        | 0.18        |
| OSRI20      | 0.07        | -0.20       |

Table SF120: Factor Loadings for TCS Items on One Factor.

| <b>Item</b> | <b>F1</b>   |
|-------------|-------------|
| TCS1        | <b>0.85</b> |
| TCS2        | <b>0.91</b> |
| TCS3        | <b>0.85</b> |
| TCS4        | <b>0.67</b> |
| TCS5        | <b>0.58</b> |
| TCS6        | <b>0.87</b> |
| TCS7        | 0.07        |
| TCS8        | 0.11        |

Table SF121: Eigenvalues, Explained Variance, and Cumulative Variance for OSRI Items.

| <b>Factor</b> | <b>Eigenvalue</b> | <b>Variance Explained</b> | <b>Cumulative Variance</b> |
|---------------|-------------------|---------------------------|----------------------------|
| 1             | 3.21              | 16.04                     | 16.04                      |
| 2             | 2.58              | 12.92                     | 28.96                      |
| 3             | 1.73              | 8.67                      | 37.63                      |
| ...           | ...               | ...                       | ...                        |
| 20            | 0.48              | 2.40                      | 100.00                     |

For the MSPD scale, we chose a five-factor solution, as the first five eigenvalues were well above 1, see Table SF123. Although an eight-factor solution was also technically justifiable (with all eigenvalues greater than 1), it resulted in the original Factor 1 splitting: items from MSPD4, MSPD6, and MSPD9 would redistribute across three new factors. Given that these items conceptually measure the same construct, we maintained the five-factor model for clarity and interpretability.

Table SF123: Eigenvalues, Explained Variance, and Cumulative Variance for MSPD Items

| <b>Factor</b> | <b>Eigenvalue</b> | <b>Variance Explained</b> | <b>Cumulative Variance</b> |
|---------------|-------------------|---------------------------|----------------------------|
| 1             | 22.20             | 40.36                     | 40.36                      |
| 2             | 6.79              | 12.34                     | 52.70                      |
| 3             | 3.82              | 6.94                      | 59.64                      |
| 4             | 2.34              | 4.25                      | 63.89                      |
| 5             | 2.07              | 3.78                      | 67.67                      |
| 6             | 1.30              | 2.37                      | 70.04                      |
| 7             | 1.26              | 2.30                      | 72.34                      |
| 8             | 1.02              | 1.85                      | 74.20                      |
| 9             | 0.97              | 1.76                      | 75.96                      |
| ...           | ...               | ...                       | ...                        |
| 55            | 0.04              | 0.06                      | 100.00                     |

Table SF124: Factor Loadings for MSPD Items on Five Factors.

| <b>Item</b> | <b>F1</b> | <b>F2</b> | <b>F3</b> | <b>F4</b>   | <b>F5</b>   |
|-------------|-----------|-----------|-----------|-------------|-------------|
| MSPD1a      | 0.03      | 0.03      | -0.03     | <b>0.72</b> | -0.04       |
| MSPD1b      | 0.06      | 0.03      | -0.01     | 0.01        | <b>0.60</b> |

Table SF124: Factor Loadings for MSPD Items on Five Factors (continued).

| Item    | F1          | F2          | F3          | F4          | F5          |
|---------|-------------|-------------|-------------|-------------|-------------|
| MSPD1c  | <b>0.69</b> | -0.01       | 0.10        | -0.02       | 0.06        |
| MSPD1d  | <b>0.72</b> | -0.05       | 0.10        | 0.05        | -0.04       |
| MSPD1e  | <b>0.75</b> | 0.01        | 0.04        | 0.08        | -0.04       |
| MSPD2a  | 0.03        | 0.00        | 0.02        | <b>0.79</b> | -0.10       |
| MSPD2b  | 0.16        | 0.02        | 0.00        | -0.06       | <b>0.72</b> |
| MSPD2c  | <b>0.84</b> | 0.01        | -0.06       | -0.08       | 0.09        |
| MSPD2d  | <b>0.89</b> | 0.00        | -0.06       | -0.03       | 0.01        |
| MSPD2e  | <b>0.90</b> | 0.02        | -0.07       | -0.01       | -0.02       |
| MSPD3a  | -0.03       | -0.03       | -0.03       | <b>0.81</b> | -0.03       |
| MSPD3b  | 0.26        | -0.02       | -0.03       | -0.02       | <b>0.67</b> |
| MSPD3c  | <b>0.82</b> | -0.03       | 0.00        | -0.07       | 0.10        |
| MSPD3d  | <b>0.88</b> | -0.01       | -0.01       | -0.01       | -0.03       |
| MSPD3e  | <b>0.89</b> | 0.02        | -0.02       | 0.00        | -0.05       |
| MSPD4a  | 0.01        | -0.04       | -0.03       | <b>0.76</b> | 0.03        |
| MSPD4b  | 0.18        | 0.08        | -0.02       | 0.02        | <b>0.69</b> |
| MSPD4c  | <b>0.74</b> | 0.04        | -0.03       | -0.04       | 0.19        |
| MSPD4d  | <b>0.78</b> | 0.04        | -0.04       | -0.02       | 0.15        |
| MSPD4e  | <b>0.80</b> | 0.06        | -0.07       | -0.01       | 0.09        |
| MSPD5a  | 0.11        | -0.05       | -0.02       | <b>0.77</b> | 0.07        |
| MSPD5b  | 0.08        | 0.08        | -0.02       | 0.15        | <b>0.62</b> |
| MSPD5c  | <b>0.85</b> | 0.00        | 0.05        | 0.06        | -0.02       |
| MSPD5d  | <b>0.88</b> | 0.02        | 0.05        | 0.08        | -0.08       |
| MSPD5e  | <b>0.90</b> | 0.02        | 0.01        | 0.10        | -0.08       |
| MSPD6a  | -0.15       | 0.01        | 0.00        | <b>0.72</b> | 0.06        |
| MSPD6b  | 0.04        | 0.05        | 0.01        | 0.02        | <b>0.77</b> |
| MSPD6c  | <b>0.65</b> | 0.05        | 0.02        | -0.10       | 0.22        |
| MSPD6d  | <b>0.69</b> | 0.05        | 0.02        | -0.06       | 0.15        |
| MSPD6e  | <b>0.68</b> | 0.08        | 0.00        | -0.03       | 0.12        |
| MSPD7a  | 0.06        | 0.11        | -0.01       | <b>0.55</b> | 0.09        |
| MSPD7b  | -0.06       | 0.01        | 0.12        | 0.07        | <b>0.61</b> |
| MSPD7c  | <b>0.61</b> | 0.02        | 0.19        | -0.04       | 0.10        |
| MSPD7d  | <b>0.66</b> | -0.01       | 0.20        | 0.02        | 0.05        |
| MSPD7e  | <b>0.65</b> | 0.01        | 0.18        | 0.02        | 0.02        |
| MSPD8a  | -0.07       | 0.11        | 0.10        | <b>0.54</b> | 0.15        |
| MSPD8b  | -0.22       | 0.10        | 0.43        | 0.11        | 0.56        |
| MSPD8c  | 0.02        | 0.02        | <b>0.93</b> | -0.04       | 0.04        |
| MSPD8d  | 0.05        | 0.00        | <b>0.95</b> | 0.00        | 0.00        |
| MSPD8e  | 0.11        | 0.01        | <b>0.87</b> | 0.00        | 0.00        |
| MSPD9a  | -0.03       | 0.10        | 0.00        | <b>0.53</b> | 0.08        |
| MSPD9b  | 0.05        | 0.11        | 0.12        | 0.04        | <b>0.56</b> |
| MSPD9c  | <b>0.55</b> | 0.02        | 0.31        | -0.05       | 0.01        |
| MSPD9d  | <b>0.58</b> | 0.03        | 0.31        | -0.01       | -0.05       |
| MSPD9e  | <b>0.62</b> | 0.06        | 0.25        | -0.02       | -0.06       |
| MSPD10a | 0.05        | <b>0.79</b> | 0.00        | 0.05        | 0.03        |
| MSPD10b | 0.01        | <b>0.82</b> | 0.01        | 0.03        | 0.03        |

Table SF124: Factor Loadings for MSPD Items on Five Factors (continued).

| Item    | F1    | F2          | F3    | F4    | F5    |
|---------|-------|-------------|-------|-------|-------|
| MSPD10c | -0.03 | <b>0.73</b> | -0.01 | 0.01  | 0.01  |
| MSPD10d | -0.04 | <b>0.75</b> | -0.05 | -0.03 | 0.10  |
| MSPD10e | -0.02 | <b>0.63</b> | -0.02 | 0.00  | 0.07  |
| MSPD10f | 0.03  | <b>0.85</b> | -0.01 | 0.08  | -0.06 |
| MSPD10g | -0.06 | <b>0.68</b> | -0.10 | 0.00  | 0.06  |
| MSPD10h | 0.02  | <b>0.81</b> | 0.03  | 0.00  | 0.04  |
| MSPD10i | 0.04  | <b>0.84</b> | 0.01  | -0.02 | 0.03  |
| MSPD10j | 0.00  | <b>0.80</b> | 0.03  | 0.04  | -0.02 |
| MSPD10k | -0.01 | <b>0.93</b> | 0.01  | -0.05 | -0.05 |
| MSPD10l | 0.00  | <b>0.96</b> | 0.01  | -0.04 | -0.08 |

For the SOQ scale, we selected a three-factor solution supported by clearly larger eigenvalues for the first three factors, see Table SF125. As shown in Table SF126, Factor 1 comprises SOQ1b, SOQ1d, SOQ1e, SOQ3b-e, SOQ4a, and SOQ4c-e, which reflect romantic and sexual behavior involving gender-diverse individuals, including trans and non-binary partners. Factor 2 includes SOQ1a, SOQ2a, SOQ3a, SOQ4b, and SOQ5b, capturing aspects of romantic, sexual, and emotional involvement with cisgender men. Factor 3 comprises SOQ2b, SOQ2c, SOQ2e, and SOQ5c-e, which are related to sexual attraction toward gender-diverse individuals, independent of behavior. A four-factor solution was also considered, as the fourth eigenvalue was slightly above 1. However, this did not alter the structure of the first three factors. Therefore, we retained the three-factor model as the most parsimonious and interpretable solution.

Table SF125: Eigenvalues, Explained Variance, and Cumulative Variance for SOQ Items

| Factor | Eigenvalue | Variance Explained | Cumulative Variance |
|--------|------------|--------------------|---------------------|
| 1      | 9.08       | 36.32              | 36.32               |
| 2      | 6.18       | 24.72              | 61.04               |
| 3      | 3.55       | 14.21              | 75.25               |
| 4      | 1.03       | 4.13               | 79.38               |
| 5      | 1.00       | 4.01               | 83.39               |
| 6      | 0.70       | 2.79               | 86.18               |
| ...    | ...        | ...                | ...                 |
| 25     | 0.01       | 0.06               | 100.00              |

Table SF126: Factor Loadings for SOQ Items on Two Factors.

| Item  | F1          | F2          | F3          |
|-------|-------------|-------------|-------------|
| SOQ1a | 0.30        | <b>0.80</b> | -0.08       |
| SOQ1b | <b>0.69</b> | 0.11        | 0.12        |
| SOQ1c | 0.39        | -0.71       | -0.10       |
| SOQ1d | <b>0.70</b> | -0.01       | 0.13        |
| SOQ1e | <b>0.54</b> | 0.01        | 0.33        |
| SOQ2a | 0.01        | <b>0.83</b> | 0.14        |
| SOQ2b | 0.10        | 0.13        | <b>0.74</b> |
| SOQ2c | 0.07        | -0.78       | 0.25        |

|       |             |             |             |
|-------|-------------|-------------|-------------|
| SOQ2d | 0.10        | -0.11       | <b>0.81</b> |
| SOQ2e | 0.03        | -0.05       | <b>0.88</b> |
| SOQ3a | 0.45        | <b>0.77</b> | -0.10       |
| SOQ3b | <b>0.89</b> | 0.09        | 0.04        |
| SOQ3c | <b>0.60</b> | -0.68       | -0.17       |
| SOQ3d | <b>0.89</b> | 0.00        | 0.05        |
| SOQ3e | <b>0.76</b> | 0.00        | 0.23        |
| SOQ4a | <b>0.59</b> | -0.67       | -0.16       |
| SOQ4b | 0.45        | <b>0.75</b> | -0.10       |
| SOQ4c | <b>0.90</b> | 0.01        | 0.06        |
| SOQ4d | <b>0.90</b> | 0.10        | 0.05        |
| SOQ4e | <b>0.76</b> | 0.00        | 0.24        |
| SOQ5a | 0.06        | -0.78       | 0.22        |
| SOQ5b | 0.03        | <b>0.82</b> | 0.14        |
| SOQ5c | 0.08        | -0.12       | <b>0.81</b> |
| SOQ5d | 0.09        | 0.16        | <b>0.76</b> |
| SOQ5e | 0.02        | -0.02       | <b>0.90</b> |

As the next step, we compared the results of the individual EFAs with the factor structure of the MGSI. Regarding the differences, we observed that MIQ1 does not load on any factor in the individual analysis, unlike in the MGSI. Furthermore, MGSI Factors 6, 9, 11, and 12 merge into a single coherent factor when conducting EFA for the MSPD items individually, which we label as Factor 1 in the MSPD EFA. Additionally, we identified that the items SOQ1a, SOQ2a, SOQ3a, SOQ4b, and SOQ5b – all referring to men – which were not loading greater than 0.40 in the MGSI, form an additional factor (Factor 2) in the SOQ EFA. Instead, in the MGSI only SOQ3a loads on Factor 5 together with items referring to non-cisgender individuals.

Despite these differences, there are several strong similarities. MGSI Factor 1 corresponds to items MSPD10a-j, which also form a distinct factor (Factor 2) when the MSPD scale is analyzed separately. MGSI Factor 2 includes MSPD1a-9a, which align with Factor 4 in the separate MSPD analysis. MGSI Factor 3 consists of MIQ4, MIQ5, SOQ1c, and SOQ2c. When the MIQ scale is analyzed separately, the items MIQ4 and MIQ5 also form a distinct factor (Factor 1). While MIQ1 does not load in the individual analysis, all TCS items clearly load on a single factor in the individual analysis of TCS items, consistent with the MGSI Factor 4. MGSI Factor 5 mostly overlaps with our Factor 1, except that in our model, SOQ3a loads separately. MGSI Factor 6 contains MSPD1c-e, MSPD2c-e, MSPD3c-e, MSPD5d-e, and MSPD7e, while in the MSPD EFA these items together with MSPD4c-e, MSPD6c-e, and MSPD9c-e (which are part of MGSI Factors 9, 11, and 12) form a unified factor (Factor 1), which is also conceptually coherent. Furthermore, MGSI Factor 7 includes MSPD8c-e, which also load together on Factor 3 in the individual analysis of MSPD. MGSI Factor 8, containing MSPD1b, MSPD2b, MSPD3b, MSPD5b, and MSPD7b, corresponds to Factor 5 in the individual analysis of MSPD items. Finally, MGSI Factor 10 corresponds to Factor 3 in the individual analysis of SOQ items, which includes SOQ2b, SOQ2d, SOQ2e, and SOQ5c-5e.

Overall, this comparison shows a high degree of conceptual overlap between the factor structures, supporting the robustness of the MGSI. Based on this comparison, we can confidently conclude that the factor structures are largely consistent across the analyses.

## References

- Bem, S.L. 1974. The measurement of psychological androgyny. *Journal of Consulting and Clinical Psychology* **42**(2) 155.
- Berry, W.D. 1985. *Multiple regression in practice*. Sage.
- Brenøe, A.A., Heursen, L., Ranehill, E., Weber, R.A. 2022. Continuous gender identity and economics. *AEA Papers and Proceedings* **112** 573–577.
- Croteau, Terri A, Morrison, Todd G. 2023. Development of the nonbinary gender microaggressions (nbgm) scale. *International Journal of Transgender Health* **24**(4) 417–435.
- De Roover, K., Vermunt, J.K. 2019. On the exploratory road to unraveling factor loading non-invariance: A new multigroup rotation approach. *Structural Equation Modeling: A Multidisciplinary Journal* **26**(6) 905–923.
- Eagly, A.H. 1987. Reporting sex difference. *American Psychologist Journal of the American Psychological Association* **42**(7).
- Egan, S.K., Perry, D.G. 2001. Gender identity: A multidimensional analysis with implications for psychosocial adjustment. *Developmental Psychology* **37**(4) 451–463.
- Gruber, Freya M, Distlberger, Eva, Scherndl, Thomas, Ortner, Tuulia M, Pletzer, Belinda. 2019. Psychometric properties of the multifaceted gender-related attributes survey (geras). *European Journal of Psychological Assessment* .
- Helmreich, Robert L, Spence, Janet T, Wilhelm, John A. 1981. A psychometric analysis of the personal attributes questionnaire. *Sex Roles* **7**(11) 1097–1108.
- Herek, Gregory M, Cogan, Jeanine C, Gillis, J Roy, Glunt, Eric K, et al. 1998. Correlates of internalized homophobia in a community sample of lesbians and gay men. *Journal of the Gay and Lesbian Medical Association* **2** 17–26.
- Howard, M.C. 2016. A review of exploratory factor analysis decisions and overview of current practices: What we are doing and how can we improve? *International Journal of Human-Computer Interaction* **32**(1) 51–62.
- Hyde, J.S., Bigler, R.S., Joel, D., Tate, C.C., van Anders, S.M. 2019. The future of sex and gender in psychology: Five challenges to the gender binary. *American Psychologist* **74**(2) 171.
- Jacobson, R., Joel, D. 2018. An exploration of the relations between self-reported gender identity and sexual orientation in an online sample of cisgender individuals. *Archives of Sexual Behavior* **47** 2407–2426.
- Jones, Bethany A, Bouman, Walter Pierre, Haycraft, Emma, Arcelus, Jon. 2019. The gender congruence and life satisfaction scale (gcls): Development and validation of a scale to measure outcomes from transgender health services. *International Journal of Transgenderism* **20**(1) 63–80.
- Kachel, S., Steffens, M.C., Niedlich, C. 2016. Traditional masculinity and femininity: Validation of a new scale assessing gender roles. *Frontiers in Psychology* .
- Kerr, Paula S, Holden, Ronald R. 1996. Development of the gender role beliefs scale (grbs). *Journal of Social Behavior and Personality* **11**(5) 3.
- Kinsey, Alfred C, Pomeroy, Wardell B, Martin, Clyde E. 1949. Sexual behavior in the human male. *The Journal of Nervous and Mental Disease* **109**(3) 283.
- Klein, Fritz, Sepekoff, Barry, Wolf, Timothy J. 1985. Sexual orientation: A multi-variable dynamic process. *Journal of Homosexuality* **11**(1-2) 35–49.

- Kozee, H.B., Tylka, T.L., Bauerband, L.A. 2012. Measuring transgender individuals' comfort with gender identity and appearance: Development and validation of the transgender congruence scale. *Psychology of Women Quarterly* **36**(2) 179–196.
- Lewis, Jioni A, Neville, Helen A. 2015. Construction and initial validation of the gendered racial microaggressions scale for black women. *Journal of Counseling Psychology* **62**(2) 289.
- Magliozzi, D., Saperstein, A., Westbrook, L. 2016. Scaling up: Representing gender diversity in survey research. *Socius* **2**.
- McGuire, Jenifer K, Berg, Dianne R, Catalpa, Jory M, Rider, G Nic, Steensma, Thomas D. 2019. Genderqueer identity scale. *Handbook of Sexuality-Related Measures*. Taylor and Francis, 355–359.
- Mohr, Jonathan J, Kendra, Matthew S. 2011. Revision and extension of a multidimensional measure of sexual minority identity: the lesbian, gay, and bisexual identity scale. *Journal of Counseling Psychology* **58**(2) 234.
- Molero, F., Recio, P., García-Ael, C., Fuster, M.J., Sanjuán, P. 2013. Measuring dimensions of perceived discrimination in five stigmatized groups. *Social Indicators Research* **114** 901–914.
- Nadal, Kevin L. 2019. Measuring lgbtq microaggressions: The sexual orientation microaggressions scale (soms) and the gender identity microaggressions scale (gims). *Journal of Homosexuality* .
- O'Brien, R.M. 2007. A caution regarding rules of thumb for variance inflation factors. *Quality & Quantity* **41** 673–690.
- Parsons, T. 1942. Age and sex in the social structure of the united states. *American Sociological Review* 604–616.
- Piasenti, S., Süer, M. 2024. Predictive power of biological sex and gender identity on economic behavior. Tech. rep., CRC TRR 190 Rationality and Competition.
- Szymanski, Dawn M. 2006. Does internalized heterosexism moderate the link between heterosexist events and lesbians' psychological distress? *Sex Roles* **54** 227–234.
- Tate, C.C., Bettergarcia, J.N., Brent, L.M. 2015. Re-assessing the role of gender-related cognitions for self-esteem: The importance of gender typicality for cisgender adults. *Sex Roles* **72**(5–6) 221–236.
